# Supplementary material
Source: publisher figshare collection journal article supplement (https://acs.figshare.com/ndownloader/files/14022170)
Supplement: Supplementary file 1 [file 14022170]

## Sheet: Dataset 1
Supplemental Dataset 1
Four different phosphopeptide enrichment resins, ALL PSMs
Reference	Trimmed Peptide	Pept. Length	Obs m/z	z	SrchName	resin	ratio	method	replicate	phos(1) non(0)	PPM	XCorr	dCn	dCn'
sp|P13807|GYS1_HUMAN	AAAHCAHVFTTVSQITAIEAQHLLK	25	544.292	5	Anatase_10x_LA_1_f10498	Anatase	10x	LA	1	0	5.12	2.999	0.28	0.28
sp|P13807|GYS1_HUMAN	AAAHCAHVFTTVSQITAIEAQHLLK	25	906.484	3	Anatase_10x_LA_1_f10498	Anatase	10x	LA	1	0	6.59	6.584	0.625	0.625
sp|P31948|STIP1_HUMAN	AAALEFLNRFEEAK	14	536.952	3	Anatase_10x_LA_1_f10498	Anatase	10x	LA	1	0	2.83	1.889	0.298	0.298
sp|Q8NAF0|ZN579_HUMAN	AAALQALQAQAPT#SPPPPPPPLK	23	781.085	3	Anatase_10x_LA_1_f10498	Anatase	10x	LA	1	1	3.65	3.09	0.003	0.404
sp|O43837|IDH3B_HUMAN	AAAVPVEFQEHHLSEVQNMASEEK	24	894.096	3	Anatase_10x_LA_1_f10498	Anatase	10x	LA	1	0	2.83	1.87	0.342	0.342
sp|P13796|PLSL_HUMAN	AACLPLPGYR	10	559.296	2	Anatase_10x_LA_1_f10498	Anatase	10x	LA	1	0	2.3	1.947	0.29	0.29
sp|Q9Y277|VDAC3_HUMAN	AADFQLHTHVNDGTEFGGSIYQK	23	845.737	3	Anatase_10x_LA_1_f10498	Anatase	10x	LA	1	0	2.32	5.883	0.467	0.467
sp|Q9Y277|VDAC3_HUMAN	AADFQLHTHVNDGTEFGGSIYQK	23	845.737	3	Anatase_10x_LA_1_f10498	Anatase	10x	LA	1	0	2.64	4.885	0.545	0.545
sp|Q6PK04|CC137_HUMAN	AADRLEQELLRDTVK	15	586.325	3	Anatase_10x_LA_1_f10498	Anatase	10x	LA	1	0	2.61	3.062	0.406	0.406
sp|O60784|TOM1_HUMAN	AADRLPNLS#SPSAEGPPGPPSGPAPR	26	859.083	3	Anatase_10x_LA_1_f10498	Anatase	10x	LA	1	1	2.15	3.037	0.006	0.225
sp|O60784|TOM1_HUMAN	AADRLPNLSS#PSAEGPPGPPSGPAPR	26	859.083	3	Anatase_10x_LA_1_f10498	Anatase	10x	LA	1	1	2.06	3.142	0.037	0.405
sp|P55263|ADK_HUMAN	AAEAHVDAHYYEQNEQPTGTCAACITGDNR	30	1117.15	3	Anatase_10x_LA_1_f10498	Anatase	10x	LA	1	0	2.64	6.03	0.547	0.547
sp|P55263|ADK_HUMAN	AAEAHVDAHYYEQNEQPTGTCAACITGDNR	30	838.114	4	Anatase_10x_LA_1_f10498	Anatase	10x	LA	1	0	3.02	3.881	0.433	0.433
sp|P55263|ADK_HUMAN	AAEAHVDAHYYEQNEQPTGTCAACITGDNR	30	1117.15	3	Anatase_10x_LA_1_f10498	Anatase	10x	LA	1	0	2.59	4.497	0.33	0.33
sp|P06454|PTMA_HUMAN	AAEDDEDDDVDTKK	14	783.328	2	Anatase_10x_LA_1_f10498	Anatase	10x	LA	1	0	2.85	2.326	0.465	0.465
sp|P06454|PTMA_HUMAN	AAEDDEDDDVDTKK	14	783.328	2	Anatase_10x_LA_1_f10498	Anatase	10x	LA	1	0	2.13	2.719	0.472	0.472
sp|O76021|RL1D1_HUMAN	AAESET#PGKS#PEK	13	745.796	2	Anatase_10x_LA_1_f10498	Anatase	10x	LA	1	1	2.42	1.884	0.129	0.191
sp|O76021|RL1D1_HUMAN	AAESET#PGKSPEK	13	470.877	3	Anatase_10x_LA_1_f10498	Anatase	10x	LA	1	1	2.19	1.669	0.146	0.327
sp|O76021|RL1D1_HUMAN	AAESETPGKS#PEK	13	705.813	2	Anatase_10x_LA_1_f10498	Anatase	10x	LA	1	1	2.54	2.36	0.273	0.448
sp|P62258|1433E_HUMAN	AAFDDAIAELDTLS#EESYK	19	1084.47	2	Anatase_10x_LA_1_f10498	Anatase	10x	LA	1	1	2.26	3.07	0.107	0.513
sp|Q9H4A6|GOLP3_HUMAN	AAGGGAGSSEDDAQSRRDEQDDDDKGDSK	29	980.41	3	Anatase_10x_LA_1_f10498	Anatase	10x	LA	1	0	1.68	2.869	0.431	0.431
sp|P47736|RPGP1_HUMAN	AAGISLIVPGKS#PTR	15	773.924	2	Anatase_10x_LA_1_f10498	Anatase	10x	LA	1	1	3.76	2.351	0.255	0.255
sp|P47736|RPGP1_HUMAN	AAGISLIVPGKS#PTRK	16	558.983	3	Anatase_10x_LA_1_f10498	Anatase	10x	LA	1	1	2.22	2.194	0.067	0.38
sp|Q9Y520|PRC2C_HUMAN	AAGS#PSS#SDQDEKLPGQDESTAGTSEQNDILK	32	1141.48	3	Anatase_10x_LA_1_f10498	Anatase	10x	LA	1	1	1.52	3.585	0.037	0.245
sp|Q9Y520|PRC2C_HUMAN	AAGS#PSSSDQDEKLPGQDESTAGTSEQNDILK	32	1114.83	3	Anatase_10x_LA_1_f10498	Anatase	10x	LA	1	1	6.82	3.749	0.015	0.373
sp|Q8WZ64|ARAP2_HUMAN	AAGT#DGNALQDQQLSKNDVPIIVNS#CIAFVT#QYGLGCK	38	1077.23	4	Anatase_10x_LA_1_f10498	Anatase	10x	LA	1	1	3.68	2.933	0.083	0.288
sp|Q8TEX9|IPO4_HUMAN	AAHEALGQFCCALHK	15	571.606	3	Anatase_10x_LA_1_f10498	Anatase	10x	LA	1	0	2.22	4.045	0.548	0.548
sp|Q8TEX9|IPO4_HUMAN	AAHEALGQFCCALHK	15	856.906	2	Anatase_10x_LA_1_f10498	Anatase	10x	LA	1	0	2.66	3.959	0.55	0.55
sp|Q8TEX9|IPO4_HUMAN	AAHEALGQFCCALHK	15	428.956	4	Anatase_10x_LA_1_f10498	Anatase	10x	LA	1	0	1.86	3.259	0.231	0.231
sp|Q9UJX2|CDC23_HUMAN	AAHFLHGCNSK	11	414.534	3	Anatase_10x_LA_1_f10498	Anatase	10x	LA	1	0	1.86	2.822	0.452	0.452
sp|Q9UJX2|CDC23_HUMAN	AAHFLHGCNSK	11	621.297	2	Anatase_10x_LA_1_f10498	Anatase	10x	LA	1	0	2.22	3.158	0.563	0.563
sp|Q9UQ80|PA2G4_HUMAN	AAHLCAEAALR	11	394.874	3	Anatase_10x_LA_1_f10498	Anatase	10x	LA	1	0	1.02	2.937	0.389	0.389
sp|Q3B7T1|EDRF1_HUMAN	AAHLEEFHYQTK	12	737.363	2	Anatase_10x_LA_1_f10498	Anatase	10x	LA	1	0	4.42	2.15	0.339	0.339
sp|P49902|5NTC_HUMAN	AAHVLM*PHESTVEHTHVDINEMESPLATR	29	817.644	4	Anatase_10x_LA_1_f10498	Anatase	10x	LA	1	0	0.26	3.99	0.24	0.24
sp|P49902|5NTC_HUMAN	AAHVLM*PHESTVEHTHVDINEMESPLATR	29	817.645	4	Anatase_10x_LA_1_f10498	Anatase	10x	LA	1	0	2.45	4.808	0.531	0.531
sp|P49902|5NTC_HUMAN	AAHVLMPHESTVEHTHVDINEM*ESPLATR	29	817.645	4	Anatase_10x_LA_1_f10498	Anatase	10x	LA	1	0	1.98	6.003	0.493	0.551
sp|P49902|5NTC_HUMAN	AAHVLMPHESTVEHTHVDINEMESPLATR	29	813.647	4	Anatase_10x_LA_1_f10498	Anatase	10x	LA	1	0	2.8	5.773	0.452	0.452
sp|P49902|5NTC_HUMAN	AAHVLMPHESTVEHTHVDINEMESPLATR	29	651.119	5	Anatase_10x_LA_1_f10498	Anatase	10x	LA	1	0	2.69	3.289	0.223	0.223
sp|P49902|5NTC_HUMAN	AAHVLMPHESTVEHTHVDINEMESPLATR	29	1084.53	3	Anatase_10x_LA_1_f10498	Anatase	10x	LA	1	0	2.94	2.461	0.319	0.319
sp|Q9H2Y7|ZN106_HUMAN	AAHVPENS#DT#EQDVLTVKPVRK	22	865.074	3	Anatase_10x_LA_1_f10498	Anatase	10x	LA	1	1	0.83	3.193	0.433	0.433
sp|Q9H2Y7|ZN106_HUMAN	AAHVPENS#DTEQDVLTVK	18	1016.97	2	Anatase_10x_LA_1_f10498	Anatase	10x	LA	1	1	2.48	1.708	0.078	0.285
sp|Q9H2Y7|ZN106_HUMAN	AAHVPENS#DTEQDVLTVKPVRK	22	838.42	3	Anatase_10x_LA_1_f10498	Anatase	10x	LA	1	1	2.4	2.891	0.06	0.463
sp|Q9H2Y7|ZN106_HUMAN	AAHVPENS#DTEQDVLTVKPVRK	22	629.067	4	Anatase_10x_LA_1_f10498	Anatase	10x	LA	1	1	2.83	2.786	0.246	0.246
sp|Q96EK5|KBP_HUMAN	AAHYCHSTLK	10	594.287	2	Anatase_10x_LA_1_f10498	Anatase	10x	LA	1	0	3.28	2.43	0.347	0.347
sp|P35637|FUS_HUMAN	AAIDWFDGK	9	511.751	2	Anatase_10x_LA_1_f10498	Anatase	10x	LA	1	0	1.45	2.398	0.205	0.205
##sp|P35573|GDE_HUMAN	AAIIGSQFNVEGT#NSPLAEPNWK	23	505.446	5	Anatase_10x_LA_1_f10498	Anatase	10x	LA	1	1	2.92	2.574	0.009	0.184
sp|Q8NDI1|EHBP1_HUMAN	AAITETQRKPS#EDEVLNK	18	703.681	3	Anatase_10x_LA_1_f10498	Anatase	10x	LA	1	1	2.91	2.424	0.23	0.23
sp|Q9UKV3|ACINU_HUMAN	AAKLS#EGS#QPAEEEEDQETPSR	22	850.011	3	Anatase_10x_LA_1_f10498	Anatase	10x	LA	1	1	2.71	3.716	0.338	0.338
sp|Q9UKV3|ACINU_HUMAN	AAKLS#EGS#QPAEEEEDQETPSR	22	1274.51	2	Anatase_10x_LA_1_f10498	Anatase	10x	LA	1	1	0.96	1.896	0.329	0.329
sp|Q99986|VRK1_HUMAN	AAKPEQIQK	9	506.794	2	Anatase_10x_LA_1_f10498	Anatase	10x	LA	1	0	2.11	2.327	0.349	0.349
sp|Q9UPT8|ZC3H4_HUMAN	AAKPGPAEAPSPT#ASPS#GDASPPATAPYDPR	31	1031.12	3	Anatase_10x_LA_1_f10498	Anatase	10x	LA	1	1	2.91	3.084	0.03	0.284
sp|Q9UPT8|ZC3H4_HUMAN	AAKPGPAEAPSPT#ASPSGDAS#PPATAPYDPR	31	1031.12	3	Anatase_10x_LA_1_f10498	Anatase	10x	LA	1	1	2.67	3.29	0.013	0.208
sp|Q9UPT8|ZC3H4_HUMAN	AAKPGPAEAPSPTASPSGDAS#PPATAPYDPR	31	1004.47	3	Anatase_10x_LA_1_f10498	Anatase	10x	LA	1	1	2.14	2.774	0.032	0.269
sp|P24941|CDK2_HUMAN	AALAHPFFQDVTKPVPHLR	19	536.8	4	Anatase_10x_LA_1_f10498	Anatase	10x	LA	1	0	1.14	2.264	0.524	0.524
sp|Q13428|TCOF_HUMAN	AALAPAKES#PRK	12	659.849	2	Anatase_10x_LA_1_f10498	Anatase	10x	LA	1	1	2.72	1.486	0.178	0.178
sp|Q13428|TCOF_HUMAN	AALAPAKES#PRK	12	440.235	3	Anatase_10x_LA_1_f10498	Anatase	10x	LA	1	1	2.01	1.567	0.201	0.201
sp|Q9UKF6|CPSF3_HUMAN	AALIREYEDNDEVHIEVHNPR	21	630.564	4	Anatase_10x_LA_1_f10498	Anatase	10x	LA	1	0	2.73	2.588	0.336	0.336
sp|Q96MW1|CCD43_HUMAN	AALLAQYADVT#DEEDEADEKDDSGATTM*NIGSDK	34	1228.85	3	Anatase_10x_LA_1_f10498	Anatase	10x	LA	1	1	1.37	3.018	0.389	0.414
sp|Q96MW1|CCD43_HUMAN	AALLAQYADVT#DEEDEADEKDDSGATTM*NIGSDK	34	1228.85	3	Anatase_10x_LA_1_f10498	Anatase	10x	LA	1	1	1.57	3.757	0.169	0.565
sp|Q96MW1|CCD43_HUMAN	AALLAQYADVT#DEEDEADEKDDSGATTMNIGSDK	34	1223.52	3	Anatase_10x_LA_1_f10498	Anatase	10x	LA	1	1	2.16	5.428	0.202	0.563
sp|P39880|CUX1_HUMAN	AANLNSIIHRLEK	13	493.621	3	Anatase_10x_LA_1_f10498	Anatase	10x	LA	1	0	2.75	1.732	0.359	0.359
sp|Q5VZL5|ZMYM4_HUMAN	AANQVEETLHTHLPQT#PETNFR	22	871.743	3	Anatase_10x_LA_1_f10498	Anatase	10x	LA	1	1	2.41	2.813	0.175	0.303
sp|P11586|C1TC_HUMAN	AAQAPSSFQLLYDLK	15	826.44	2	Anatase_10x_LA_1_f10498	Anatase	10x	LA	1	0	2.4	3.215	0.573	0.573
sp|Q9BTC0|DIDO1_HUMAN	AAQDIKDEEPGDLGRPKPECEGYDPNALYCICR	33	959.943	4	Anatase_10x_LA_1_f10498	Anatase	10x	LA	1	0	4.63	3.511	0.291	0.291
sp|Q9BTC0|DIDO1_HUMAN	AAQDIKDEEPGDLGRPKPECEGYDPNALYCICR	33	768.154	5	Anatase_10x_LA_1_f10498	Anatase	10x	LA	1	0	2.3	2.672	0.253	0.253
sp|Q96B54|ZN428_HUMAN	AAQPPAQPCQLCGRS#PLGEAPPGTPPCR	28	1017.47	3	Anatase_10x_LA_1_f10498	Anatase	10x	LA	1	1	3.07	2.531	0.273	0.273
sp|Q96B54|ZN428_HUMAN	AAQPPAQPCQLCGRS#PLGEAPPGTPPCR	28	1017.47	3	Anatase_10x_LA_1_f10498	Anatase	10x	LA	1	1	2.08	2.114	0.332	0.332
sp|P78318|IGBP1_HUMAN	AAQQQEEQEEKEEEDDEQTLHR	22	675.549	4	Anatase_10x_LA_1_f10498	Anatase	10x	LA	1	0	2.3	3.639	0.442	0.442
sp|P78318|IGBP1_HUMAN	AAQQQEEQEEKEEEDDEQTLHR	22	900.396	3	Anatase_10x_LA_1_f10498	Anatase	10x	LA	1	0	2.16	5.183	0.457	0.457
sp|P78318|IGBP1_HUMAN	AAQQQEEQEEKEEEDDEQTLHR	22	900.396	3	Anatase_10x_LA_1_f10498	Anatase	10x	LA	1	0	2.89	5.381	0.515	0.515
sp|Q86U86|PB1_HUMAN	AAQQQQPSAS#PR	12	674.805	2	Anatase_10x_LA_1_f10498	Anatase	10x	LA	1	1	2.31	2.457	0.273	0.325
sp|Q99459|CDC5L_HUMAN	AAQRDNEEETTDDPRK	16	625.622	3	Anatase_10x_LA_1_f10498	Anatase	10x	LA	1	0	2.14	4.395	0.511	0.511
sp|Q99459|CDC5L_HUMAN	AAQRDNEEETTDDPRK	16	469.468	4	Anatase_10x_LA_1_f10498	Anatase	10x	LA	1	0	2.12	2.995	0.567	0.567
sp|Q96A26|F162A_HUMAN	AAQRHETLTSLNLEK	15	570.977	3	Anatase_10x_LA_1_f10498	Anatase	10x	LA	1	0	1.94	4.048	0.487	0.487
sp|O00116|ADAS_HUMAN	AAS#AATAAPTATPAAQESGTIPK	23	1082.02	2	Anatase_10x_LA_1_f10498	Anatase	10x	LA	1	1	2.57	2.079	0.079	0.245
sp|Q9ULR3|PPM1H_HUMAN	AAS#LRGGVGAPGSPSTPPTR	20	639.319	3	Anatase_10x_LA_1_f10498	Anatase	10x	LA	1	1	2.74	2.439	0.26	0.326
sp|Q5VSL9|STRP1_HUMAN	AAS#PPASASDLIEQQQK	17	910.928	2	Anatase_10x_LA_1_f10498	Anatase	10x	LA	1	1	2.95	2.662	0.27	0.382
sp|P51948|MAT1_HUMAN	AAS#PQDLAGGYTSSLACHR	19	1021.45	2	Anatase_10x_LA_1_f10498	Anatase	10x	LA	1	1	2.09	2.281	0.363	0.418
sp|Q14126|DSG2_HUMAN	AAS#YTEEDENHTAK	14	823.324	2	Anatase_10x_LA_1_f10498	Anatase	10x	LA	1	1	2.41	1.716	0.199	0.416
sp|O15127|SCAM2_HUMAN	AASS#AAQGAFQGN	13	630.258	2	Anatase_10x_LA_1_f10498	Anatase	10x	LA	1	1	1.99	2.575	0.011	0.555
sp|Q96B36|AKTS1_HUMAN	AATAARPPAPPPAPQPPSPT#PS#PPRPTLAR	30	1042.19	3	Anatase_10x_LA_1_f10498	Anatase	10x	LA	1	1	2.88	4.278	0.002	0.57
sp|Q9H0E3|SP130_HUMAN	AATDDDLHRINELIQGNM*QR	20	776.048	3	Anatase_10x_LA_1_f10498	Anatase	10x	LA	1	0	4.08	4.419	0.451	0.451
sp|Q9H0E3|SP130_HUMAN	AATDDDLHRINELIQGNMQR	20	770.717	3	Anatase_10x_LA_1_f10498	Anatase	10x	LA	1	0	4.84	5.045	0.458	0.458
sp|P10809|CH60_HUMAN	AAVEEGIVLGGGCALLR	17	842.959	2	Anatase_10x_LA_1_f10498	Anatase	10x	LA	1	0	3.04	3.502	0.422	0.422
sp|P10809|CH60_HUMAN	AAVEEGIVLGGGCALLR	17	562.308	3	Anatase_10x_LA_1_f10498	Anatase	10x	LA	1	0	2.96	2.946	0.331	0.331
sp|P10809|CH60_HUMAN	AAVEEGIVLGGGCALLR	17	842.958	2	Anatase_10x_LA_1_f10498	Anatase	10x	LA	1	0	1.91	2.931	0.386	0.386
sp|Q86V81|THOC4_HUMAN	AAVHYDR	7	416.21	2	Anatase_10x_LA_1_f10498	Anatase	10x	LA	1	0	2.05	1.91	0.203	0.203
sp|Q96ST2|IWS1_HUMAN	AAVLS#DS#EDEEK	12	726.764	2	Anatase_10x_LA_1_f10498	Anatase	10x	LA	1	1	2.54	2.186	0.622	0.622
sp|P06733|ENOA_HUMAN	AAVPSGASTGIYEALELR	18	902.983	2	Anatase_10x_LA_1_f10498	Anatase	10x	LA	1	0	8.62	3.353	0.557	0.557
sp|B0I1T2|MYO1G_HUMAN	AAVSALLEQHGLQGDVAFGHSK	22	745.724	3	Anatase_10x_LA_1_f10498	Anatase	10x	LA	1	0	2.11	4.43	0.549	0.549
sp|P35611|ADDA_HUMAN	AAVVTS#PPPTTAPHK	15	777.392	2	Anatase_10x_LA_1_f10498	Anatase	10x	LA	1	1	2.27	3.156	0.088	0.516
sp|Q9H0E3|SP130_HUMAN	AAYHHFQR	8	515.256	2	Anatase_10x_LA_1_f10498	Anatase	10x	LA	1	0	3.27	1.776	0.27	0.27
sp|P04083|ANXA1_HUMAN	AAYLQETGKPLDETLKK	17	635.684	3	Anatase_10x_LA_1_f10498	Anatase	10x	LA	1	0	2.31	2.788	0.358	0.358
sp|P04083|ANXA1_HUMAN	AAYLQETGKPLDETLKK	17	477.014	4	Anatase_10x_LA_1_f10498	Anatase	10x	LA	1	0	1.5	1.47	0.272	0.272
sp|P04083|ANXA1_HUMAN	AAYLQETGKPLDETLKK	17	953.023	2	Anatase_10x_LA_1_f10498	Anatase	10x	LA	1	0	3.34	2.766	0.449	0.449
sp|P00558|PGK1_HUMAN	ACANPAAGSVILLENLR	17	884.976	2	Anatase_10x_LA_1_f10498	Anatase	10x	LA	1	0	4.09	4.014	0.587	0.587
sp|Q9Y5A7|NUB1_HUMAN	ACDGNVDHAATHITNR	16	584.602	3	Anatase_10x_LA_1_f10498	Anatase	10x	LA	1	0	2.71	3.115	0.31	0.31
sp|Q9Y490|TLN1_HUMAN	ACEFAGFQCQIQFGPHNEQK	20	799.359	3	Anatase_10x_LA_1_f10498	Anatase	10x	LA	1	0	3.29	2.191	0.233	0.233
sp|Q9Y490|TLN1_HUMAN	ACEFAGFQCQIQFGPHNEQK	20	799.359	3	Anatase_10x_LA_1_f10498	Anatase	10x	LA	1	0	3.38	2.125	0.294	0.294
sp|Q9Y6D6|BIG1_HUMAN	ACEVALEEIKAETEKQS#PPHGEAK	24	911.094	3	Anatase_10x_LA_1_f10498	Anatase	10x	LA	1	1	1.55	3.053	0.125	0.347
sp|Q14847|LASP1_HUMAN	ACFHCETCK	9	606.735	2	Anatase_10x_LA_1_f10498	Anatase	10x	LA	1	0	2.78	1.757	0.325	0.325
sp|Q86UA6|RIP_HUMAN	ACLEGSINEHSAHCPHTPEFSVTGGTEEK	29	1061.14	3	Anatase_10x_LA_1_f10498	Anatase	10x	LA	1	0	1.74	2.963	0.402	0.402
sp|Q86UA6|RIP_HUMAN	ACLEGSINEHSAHCPHTPEFSVTGGTEEK	29	796.106	4	Anatase_10x_LA_1_f10498	Anatase	10x	LA	1	0	2.37	3.899	0.333	0.333
sp|Q86UA6|RIP_HUMAN	ACLEGSINEHSAHCPHTPEFSVTGGTEEK	29	637.086	5	Anatase_10x_LA_1_f10498	Anatase	10x	LA	1	0	2.45	2.597	0.202	0.202
sp|Q86UA6|RIP_HUMAN	ACLEGSINEHSAHCPHTPEFSVTGGTEEK	29	1061.14	3	Anatase_10x_LA_1_f10498	Anatase	10x	LA	1	0	1.8	3.806	0.371	0.371
sp|O95782|AP2A1_HUMAN	ACNQLGQFLQHR	12	491.246	3	Anatase_10x_LA_1_f10498	Anatase	10x	LA	1	0	1.62	2.947	0.378	0.378
sp|Q9P2E3|ZNFX1_HUMAN	ACQHLILIGDHQQLRPSANVYDLAK	25	715.88	4	Anatase_10x_LA_1_f10498	Anatase	10x	LA	1	0	3.07	2.829	0.213	0.213
sp|P61247|RS3A_HUMAN	ACQSIYPLHDVFVR	14	568.957	3	Anatase_10x_LA_1_f10498	Anatase	10x	LA	1	0	2.33	2.781	0.369	0.369
sp|P61247|RS3A_HUMAN	ACQSIYPLHDVFVRK	15	458.993	4	Anatase_10x_LA_1_f10498	Anatase	10x	LA	1	0	1.73	2.941	0.523	0.523
sp|Q9Y490|TLN1_HUMAN	ADAEGESDLENSRK	14	760.847	2	Anatase_10x_LA_1_f10498	Anatase	10x	LA	1	0	2.28	2.415	0.241	0.241
sp|Q3YEC7|RABL6_HUMAN	ADDFPVRDDPS#DVT#DEDEGPAEPPPPPK	28	1055.43	3	Anatase_10x_LA_1_f10498	Anatase	10x	LA	1	1	2.72	2.399	0.23	0.23
sp|Q3YEC7|RABL6_HUMAN	ADDFPVRDDPS#DVT#DEDEGPAEPPPPPK	28	1055.43	3	Anatase_10x_LA_1_f10498	Anatase	10x	LA	1	1	2.32	4.043	0.509	0.509
sp|P04075|ALDOA_HUMAN	ADDGRPFPQVIK	12	448.243	3	Anatase_10x_LA_1_f10498	Anatase	10x	LA	1	0	1.66	2.646	0.368	0.368
sp|O43290|SNUT1_HUMAN	ADDLLPLGDQT#QDGDFGSR	19	1050.45	2	Anatase_10x_LA_1_f10498	Anatase	10x	LA	1	1	2.57	2.088	0.271	0.271
sp|Q12888|TP53B_HUMAN	ADDPLRLDQELQQPQTQEK	19	751.379	3	Anatase_10x_LA_1_f10498	Anatase	10x	LA	1	0	3.15	3.014	0.234	0.234
sp|Q8NEM7|SP20H_HUMAN	ADEESDSQMSPSHSST#DDHSNWFIIGSK	28	1058.76	3	Anatase_10x_LA_1_f10498	Anatase	10x	LA	1	1	2.21	2.964	0.025	0.279
sp|Q06830|PRDX1_HUMAN	ADEGISFR	8	447.72	2	Anatase_10x_LA_1_f10498	Anatase	10x	LA	1	0	2.02	2.636	0.496	0.496
sp|Q9NX40|OCAD1_HUMAN	ADFREPNAEVPRPIPHIGPDYIPTEEERR	29	680.948	5	Anatase_10x_LA_1_f10498	Anatase	10x	LA	1	0	2.89	2.503	0.292	0.292
##sp|O15068|MCF2L_HUMAN	ADGKVNETIGVAAM*NLSQK	19	491.256	4	Anatase_10x_LA_1_f10498	Anatase	10x	LA	1	0	2.79	1.78	0.191	0.191
sp|P62241|RS8_HUMAN	ADGYVLEGK	9	476.244	2	Anatase_10x_LA_1_f10498	Anatase	10x	LA	1	0	2.64	1.936	0.213	0.213
sp|P62333|PRS10_HUMAN	ADHDFVVQEDFMK	13	790.859	2	Anatase_10x_LA_1_f10498	Anatase	10x	LA	1	0	3.27	2.39	0.413	0.413
sp|P08238|HS90B_HUMAN	ADHGEPIGR	9	476.237	2	Anatase_10x_LA_1_f10498	Anatase	10x	LA	1	0	2.04	1.815	0.312	0.312
sp|P08238|HS90B_HUMAN	ADHGEPIGR	9	476.237	2	Anatase_10x_LA_1_f10498	Anatase	10x	LA	1	0	2.11	2.169	0.398	0.398
sp|P08865|RSSA_HUMAN	ADHQPLTEASYVNLPTIALCNTDSPLR	27	999.503	3	Anatase_10x_LA_1_f10498	Anatase	10x	LA	1	0	5.56	5.341	0.525	0.525
sp|P36542|ATPG_HUMAN	ADIKGPEDK	9	486.754	2	Anatase_10x_LA_1_f10498	Anatase	10x	LA	1	0	1.7	2.129	0.228	0.228
sp|Q99797|MIPEP_HUMAN	ADKPHQDCHFTIR	13	406.947	4	Anatase_10x_LA_1_f10498	Anatase	10x	LA	1	0	1.85	3.772	0.527	0.527
sp|Q99797|MIPEP_HUMAN	ADKPHQDCHFTIR	13	542.261	3	Anatase_10x_LA_1_f10498	Anatase	10x	LA	1	0	2.3	3.072	0.445	0.445
sp|Q99797|MIPEP_HUMAN	ADKPHQDCHFTIR	13	812.888	2	Anatase_10x_LA_1_f10498	Anatase	10x	LA	1	0	2.82	2.397	0.315	0.315
sp|Q969V3|NCLN_HUMAN	ADKRDPEFVFYDQLK	15	624.318	3	Anatase_10x_LA_1_f10498	Anatase	10x	LA	1	0	3.07	3.427	0.269	0.269
##sp|Q86UP3|ZFHX4_HUMAN	ADLHTDK	7	400.202	2	Anatase_10x_LA_1_f10498	Anatase	10x	LA	1	0	1.59	2.098	0.136	0.136
sp|Q58FF8|H90B2_HUMAN	ADLINNLGTIAK	12	621.858	2	Anatase_10x_LA_1_f10498	Anatase	10x	LA	1	0	2.93	3.473	0.506	0.506
sp|P08195|4F2_HUMAN	ADLLLSTQPGREEGSPLELER	21	770.739	3	Anatase_10x_LA_1_f10498	Anatase	10x	LA	1	0	3.5	2.507	0.341	0.341
sp|Q15269|PWP2_HUMAN	ADLLQREEEEEEEEDQEGDRETTIR	25	1016.79	3	Anatase_10x_LA_1_f10498	Anatase	10x	LA	1	0	2.6	3.221	0.313	0.313
sp|Q9NUQ3|TXLNG_HUMAN	ADMLCNSQSNDILQHQGSNCGGTSNK	26	946.075	3	Anatase_10x_LA_1_f10498	Anatase	10x	LA	1	0	1.89	4.532	0.511	0.511
sp|Q9NUQ3|TXLNG_HUMAN	ADMLCNSQSNDILQHQGSNCGGTSNK	26	946.075	3	Anatase_10x_LA_1_f10498	Anatase	10x	LA	1	0	2.07	3.372	0.363	0.363
sp|P13612|ITA4_HUMAN	ADPHCLNFLCNFGK	14	564.927	3	Anatase_10x_LA_1_f10498	Anatase	10x	LA	1	0	2.03	3.804	0.415	0.415
sp|Q00534|CDK6_HUMAN	ADQQYECVAEIGEGAYGK	18	994.439	2	Anatase_10x_LA_1_f10498	Anatase	10x	LA	1	0	0.64	3.998	0.606	0.606
sp|P62263|RS14_HUMAN	ADRDESSPYAAM*LAAQDVAQR	21	761.024	3	Anatase_10x_LA_1_f10498	Anatase	10x	LA	1	0	3	4.587	0.516	0.516
sp|P62263|RS14_HUMAN	ADRDESSPYAAM*LAAQDVAQR	21	761.024	3	Anatase_10x_LA_1_f10498	Anatase	10x	LA	1	0	3.29	3.894	0.457	0.457
sp|P62263|RS14_HUMAN	ADRDESSPYAAMLAAQDVAQR	21	1133.03	2	Anatase_10x_LA_1_f10498	Anatase	10x	LA	1	0	2.11	2.976	0.543	0.543
sp|Q9Y5B9|SP16H_HUMAN	ADRESRYEEEEEQSR	15	638.282	3	Anatase_10x_LA_1_f10498	Anatase	10x	LA	1	0	2.1	2.95	0.28	0.28
sp|Q9Y5B9|SP16H_HUMAN	ADRESRYEEEEEQSR	15	638.282	3	Anatase_10x_LA_1_f10498	Anatase	10x	LA	1	0	2.17	3.231	0.374	0.374
sp|Q9Y5B9|SP16H_HUMAN	ADRESRYEEEEEQSR	15	956.919	2	Anatase_10x_LA_1_f10498	Anatase	10x	LA	1	0	2.37	1.925	0.301	0.301
sp|O60841|IF2P_HUMAN	ADRETVAVKPTENNEEEFTSK	21	798.721	3	Anatase_10x_LA_1_f10498	Anatase	10x	LA	1	0	2.57	3.861	0.387	0.387
sp|O60841|IF2P_HUMAN	ADRETVAVKPTENNEEEFTSK	21	599.292	4	Anatase_10x_LA_1_f10498	Anatase	10x	LA	1	0	2.45	4.099	0.218	0.218
sp|O60841|IF2P_HUMAN	ADRETVAVKPTENNEEEFTSK	21	1197.58	2	Anatase_10x_LA_1_f10498	Anatase	10x	LA	1	0	2.37	2.318	0.407	0.407
sp|O60841|IF2P_HUMAN	ADRETVAVKPTENNEEEFTSK	21	1197.58	2	Anatase_10x_LA_1_f10498	Anatase	10x	LA	1	0	2.41	3.271	0.42	0.42
sp|Q9Y388|RBMX2_HUMAN	ADREVQAEQPSSSS#PR	16	608.603	3	Anatase_10x_LA_1_f10498	Anatase	10x	LA	1	1	2.07	3.688	0.06	0.312
sp|Q7Z4V5|HDGR2_HUMAN	ADRGEAERGS#GGS#S#GDELREDDEPVK	26	986.714	3	Anatase_10x_LA_1_f10498	Anatase	10x	LA	1	1	2.61	2.192	0.286	0.286
sp|Q96JM7|LMBL3_HUMAN	ADTKEDGEERDDEMENK	17	670.946	3	Anatase_10x_LA_1_f10498	Anatase	10x	LA	1	0	2.53	2.803	0.244	0.244
sp|P25440|BRD2_HUMAN	ADTTTPTPTAILAPGS#PAS#PPGSLEPK	27	1367.64	2	Anatase_10x_LA_1_f10498	Anatase	10x	LA	1	1	2.95	2.564	0.219	0.369
sp|Q86VP6|CAND1_HUMAN	ADVFHAYLSLLK	12	688.884	2	Anatase_10x_LA_1_f10498	Anatase	10x	LA	1	0	2.99	1.75	0.318	0.318
sp|Q53EZ4|CEP55_HUMAN	ADVQHLEDDRHK	12	731.857	2	Anatase_10x_LA_1_f10498	Anatase	10x	LA	1	0	2.91	2.473	0.33	0.33
sp|Q13263|TIF1B_HUMAN	ADVQSIIGLQR	11	600.342	2	Anatase_10x_LA_1_f10498	Anatase	10x	LA	1	0	2.82	1.815	0.243	0.243
sp|O75362|ZN217_HUMAN	ADVTPPPDGSTTHNLEVS#PK	20	1071.49	2	Anatase_10x_LA_1_f10498	Anatase	10x	LA	1	1	2.3	1.808	0.281	0.281
sp|Q5T5Y3|CAMP1_HUMAN	ADVVPQQADPEFPRAS#PR	18	1030.49	2	Anatase_10x_LA_1_f10498	Anatase	10x	LA	1	1	2.36	1.844	0.292	0.292
sp|Q99490|AGAP2_HUMAN	AEAAAVAGLSTPGS#LHR	17	844.414	2	Anatase_10x_LA_1_f10498	Anatase	10x	LA	1	1	2.22	3.401	0.054	0.53
sp|Q9BRJ6|CG050_HUMAN	AEALMRELDEEGS#DPPLPGR	20	754.677	3	Anatase_10x_LA_1_f10498	Anatase	10x	LA	1	1	2.45	2.661	0.313	0.313
sp|Q66PJ3|AR6P4_HUMAN	AEAQQVEALPGPSLDQWHRS#AGEEEDGPVLTDEQK	35	1299.6	3	Anatase_10x_LA_1_f10498	Anatase	10x	LA	1	1	2.91	4.073	0.03	0.352
sp|Q02790|FKBP4_HUMAN	AEASSGDHPTDTEM*KEEQK	19	702.638	3	Anatase_10x_LA_1_f10498	Anatase	10x	LA	1	0	2.89	3.106	0.378	0.378
sp|Q02790|FKBP4_HUMAN	AEASSGDHPTDTEMK	15	788.335	2	Anatase_10x_LA_1_f10498	Anatase	10x	LA	1	0	2.46	2.178	0.2	0.2
sp|Q02790|FKBP4_HUMAN	AEASSGDHPTDTEMKEEQK	19	697.306	3	Anatase_10x_LA_1_f10498	Anatase	10x	LA	1	0	2.35	3.985	0.568	0.568
sp|Q02790|FKBP4_HUMAN	AEASSGDHPTDTEMKEEQK	19	1045.46	2	Anatase_10x_LA_1_f10498	Anatase	10x	LA	1	0	2.52	2.997	0.524	0.524
sp|Q8WYQ5|DGCR8_HUMAN	AECGLLLS#PVSGDVHACPFGGSVGDGVGIGGESADKKDEENELDQEK	47	1228.05	4	Anatase_10x_LA_1_f10498	Anatase	10x	LA	1	1	3.27	3.67	0.004	0.395
sp|Q8WYQ5|DGCR8_HUMAN	AECGLLLSPVSGDVHACPFGGSVGDGVGIGGESADKKDEENELDQEK	47	966.652	5	Anatase_10x_LA_1_f10498	Anatase	10x	LA	1	0	3.02	3.549	0.334	0.334
sp|Q01664|TFAP4_HUMAN	AEDKDEGIGS#PDIWEDEK	18	1056.94	2	Anatase_10x_LA_1_f10498	Anatase	10x	LA	1	1	2.43	3.294	0.534	0.534
sp|Q9Y6G9|DC1L1_HUMAN	AEDNFEDIITKPPVRK	16	468.753	4	Anatase_10x_LA_1_f10498	Anatase	10x	LA	1	0	1.89	3.59	0.453	0.453
sp|Q9Y6G9|DC1L1_HUMAN	AEDNFEDIITKPPVRK	16	624.669	3	Anatase_10x_LA_1_f10498	Anatase	10x	LA	1	0	2.56	3.594	0.509	0.509
sp|Q7Z5K2|WAPL_HUMAN	AEDS#ICLADSKPLPHQNVTNHVGK	24	678.324	4	Anatase_10x_LA_1_f10498	Anatase	10x	LA	1	1	2.6	2.259	0.188	0.188
sp|Q7Z5K2|WAPL_HUMAN	AEDSICLADSKPLPHQNVTNHVGK	24	658.332	4	Anatase_10x_LA_1_f10498	Anatase	10x	LA	1	0	2.65	2.079	0.379	0.379
sp|Q7Z5K2|WAPL_HUMAN	AEDSICLADSKPLPHQNVTNHVGK	24	877.44	3	Anatase_10x_LA_1_f10498	Anatase	10x	LA	1	0	2.56	3.816	0.586	0.586
sp|P27824|CALX_HUMAN	AEEDEILNRS#PR	12	754.843	2	Anatase_10x_LA_1_f10498	Anatase	10x	LA	1	1	2.68	1.738	0.439	0.439
##sp|Q9UMN6|KMT2B_HUMAN	AEEKEAAPMMEEAVAREEK	19	716.673	3	Anatase_10x_LA_1_f10498	Anatase	10x	LA	1	0	4.12	2.679	0.199	0.199
sp|Q9UK58|CCNL1_HUMAN	AEEKS#PISINVK	12	697.852	2	Anatase_10x_LA_1_f10498	Anatase	10x	LA	1	1	2.6	2.613	0.133	0.351
sp|Q9NU22|MDN1_HUMAN	AEENTDQAS#PQEDYAGFER	19	1118.94	2	Anatase_10x_LA_1_f10498	Anatase	10x	LA	1	1	1.69	2.575	0.323	0.386
sp|Q9NU22|MDN1_HUMAN	AEENTDQAS#PQEDYAGFER	19	1118.94	2	Anatase_10x_LA_1_f10498	Anatase	10x	LA	1	1	2.28	2.85	0.284	0.594
sp|Q8NDT2|RB15B_HUMAN	AEETRYPQQYQPS#PLPVHYELLTDGYTR	28	1144.54	3	Anatase_10x_LA_1_f10498	Anatase	10x	LA	1	1	2.68	4.519	0.27	0.509
sp|Q6UN15|FIP1_HUMAN	AEFTS#PPSLFK	11	652.304	2	Anatase_10x_LA_1_f10498	Anatase	10x	LA	1	1	2.4	1.707	0.164	0.3
sp|P78559|MAP1A_HUMAN	AEGEREEEGRAEAPDK	16	886.908	2	Anatase_10x_LA_1_f10498	Anatase	10x	LA	1	0	2.75	1.975	0.292	0.292
sp|P78559|MAP1A_HUMAN	AEGEREEEGRAEAPDK	16	591.608	3	Anatase_10x_LA_1_f10498	Anatase	10x	LA	1	0	2.32	2.391	0.302	0.302
sp|Q9NYF8|BCLF1_HUMAN	AEGEWEDQEALDY#FSDK	17	1056.41	2	Anatase_10x_LA_1_f10498	Anatase	10x	LA	1	1	1.26	1.949	0.033	0.286
sp|Q9NYF8|BCLF1_HUMAN	AEGEWEDQEALDYFS#DK	17	1056.41	2	Anatase_10x_LA_1_f10498	Anatase	10x	LA	1	1	1.41	3.441	0.046	0.538
sp|Q00839|HNRPU_HUMAN	AEGGGGGGRPGAPAAGDGKTEQK	23	675.664	3	Anatase_10x_LA_1_f10498	Anatase	10x	LA	1	0	2.17	4.375	0.508	0.508
sp|Q00839|HNRPU_HUMAN	AEGGGGGGRPGAPAAGDGKTEQK	23	675.664	3	Anatase_10x_LA_1_f10498	Anatase	10x	LA	1	0	2.15	4.662	0.607	0.607
sp|Q00839|HNRPU_HUMAN	AEGGGGGGRPGAPAAGDGKTEQK	23	1012.99	2	Anatase_10x_LA_1_f10498	Anatase	10x	LA	1	0	3.76	1.643	0.272	0.272
sp|Q00839|HNRPU_HUMAN	AEGGGGGGRPGAPAAGDGKTEQK	23	1012.99	2	Anatase_10x_LA_1_f10498	Anatase	10x	LA	1	0	1.63	2.427	0.425	0.425
sp|Q9P2D1|CHD7_HUMAN	AEGGPFKDGETLEGS#DAEESLDK	23	1231.02	2	Anatase_10x_LA_1_f10498	Anatase	10x	LA	1	1	2.89	1.715	0.095	0.268
sp|P14618|KPYM_HUMAN	AEGSDVANAVLDGADCIM*LSGETAK	25	1255.58	2	Anatase_10x_LA_1_f10498	Anatase	10x	LA	1	0	4.81	3.022	0.492	0.492
sp|P14618|KPYM_HUMAN	AEGSDVANAVLDGADCIMLSGETAK	25	1247.58	2	Anatase_10x_LA_1_f10498	Anatase	10x	LA	1	0	2.54	2.52	0.405	0.405
sp|P20700|LMNB1_HUMAN	AEHDQLLLNYAK	12	472.25	3	Anatase_10x_LA_1_f10498	Anatase	10x	LA	1	0	1.35	3.602	0.422	0.422
sp|P20700|LMNB1_HUMAN	AEHDQLLLNYAK	12	707.872	2	Anatase_10x_LA_1_f10498	Anatase	10x	LA	1	0	2.57	2.982	0.403	0.403
sp|Q01082|SPTB2_HUMAN	AEHERELALRNELIR	15	617.007	3	Anatase_10x_LA_1_f10498	Anatase	10x	LA	1	0	1.98	3.126	0.274	0.274
sp|Q01082|SPTB2_HUMAN	AEHERELALRNELIR	15	463.007	4	Anatase_10x_LA_1_f10498	Anatase	10x	LA	1	0	1.59	2.559	0.385	0.385
sp|O95394|AGM1_HUMAN	AEHLDHVMFR	10	418.874	3	Anatase_10x_LA_1_f10498	Anatase	10x	LA	1	0	1.16	2.679	0.47	0.47
sp|Q9UH99|SUN2_HUMAN	AEHQQDSEDLFKK	13	525.587	3	Anatase_10x_LA_1_f10498	Anatase	10x	LA	1	0	1.57	3.192	0.416	0.416
sp|P54886|P5CS_HUMAN	AEIIHHLADLLTDQRDEILLANKK	24	693.14	4	Anatase_10x_LA_1_f10498	Anatase	10x	LA	1	0	4.65	4.242	0.514	0.514
sp|P54886|P5CS_HUMAN	AEIIHHLADLLTDQRDEILLANKK	24	693.139	4	Anatase_10x_LA_1_f10498	Anatase	10x	LA	1	0	3.74	5.773	0.553	0.553
sp|P54886|P5CS_HUMAN	AEIIHHLADLLTDQRDEILLANKK	24	554.713	5	Anatase_10x_LA_1_f10498	Anatase	10x	LA	1	0	3.81	3.724	0.463	0.463
sp|P54886|P5CS_HUMAN	AEIIHHLADLLTDQRDEILLANKK	24	923.849	3	Anatase_10x_LA_1_f10498	Anatase	10x	LA	1	0	2.9	6.215	0.548	0.548
sp|Q8WW33|GTSF1_HUMAN	AEISHHISSCDDR	13	763.838	2	Anatase_10x_LA_1_f10498	Anatase	10x	LA	1	0	2.57	3.509	0.512	0.512
sp|Q8WW33|GTSF1_HUMAN	AEISHHISSCDDR	13	509.561	3	Anatase_10x_LA_1_f10498	Anatase	10x	LA	1	0	1.99	3.037	0.489	0.489
sp|Q8WW33|GTSF1_HUMAN	AEISHHISSCDDRSCIEQDVVNQTR	25	739.839	4	Anatase_10x_LA_1_f10498	Anatase	10x	LA	1	0	2.8	3.806	0.356	0.356
sp|Q8WW33|GTSF1_HUMAN	AEISHHISSCDDRSCIEQDVVNQTR	25	986.115	3	Anatase_10x_LA_1_f10498	Anatase	10x	LA	1	0	1.28	2.802	0.319	0.319
sp|Q8WW33|GTSF1_HUMAN	AEISHHISSCDDRSCIEQDVVNQTR	25	986.116	3	Anatase_10x_LA_1_f10498	Anatase	10x	LA	1	0	1.89	3.567	0.456	0.456
sp|Q8WW33|GTSF1_HUMAN	AEISHHISSCDDRSCIEQDVVNQTR	25	986.117	3	Anatase_10x_LA_1_f10498	Anatase	10x	LA	1	0	3.48	3.892	0.425	0.425
sp|Q8WW33|GTSF1_HUMAN	AEISHHISSCDDRSCIEQDVVNQTR	25	739.839	4	Anatase_10x_LA_1_f10498	Anatase	10x	LA	1	0	2.91	4.036	0.341	0.341
sp|P78559|MAP1A_HUMAN	AELEEM*EEVHPS#DEEEEDATK	21	847.997	3	Anatase_10x_LA_1_f10498	Anatase	10x	LA	1	1	2.24	2.325	0.06	0.256
sp|P78559|MAP1A_HUMAN	AELEEM*EEVHPS#DEEEEDATK	21	1271.49	2	Anatase_10x_LA_1_f10498	Anatase	10x	LA	1	1	1.74	1.941	0.364	0.364
sp|P78559|MAP1A_HUMAN	AELEEM*EEVHPS#DEEEEDATKAEGFYQK	28	1122.46	3	Anatase_10x_LA_1_f10498	Anatase	10x	LA	1	1	2.21	4.335	0.318	0.447
sp|P78559|MAP1A_HUMAN	AELEEM*EEVHPS#DEEEEDATKAEGFYQK	28	1122.46	3	Anatase_10x_LA_1_f10498	Anatase	10x	LA	1	1	1.09	2.945	0.075	0.232
sp|P78559|MAP1A_HUMAN	AELEEMEEVHPS#DEEEEDATK	21	842.666	3	Anatase_10x_LA_1_f10498	Anatase	10x	LA	1	1	2.93	2.691	0.159	0.386
sp|P78559|MAP1A_HUMAN	AELEEMEEVHPS#DEEEEDATKAEGFYQK	28	1117.13	3	Anatase_10x_LA_1_f10498	Anatase	10x	LA	1	1	1.35	4.917	0.379	0.566
sp|Q8N1B4|VPS52_HUMAN	AELINIHHLMVELKK	15	447.762	4	Anatase_10x_LA_1_f10498	Anatase	10x	LA	1	0	4.35	2.696	0.555	0.555
sp|O00231|PSD11_HUMAN	AELRDDPIISTHLAK	15	420.484	4	Anatase_10x_LA_1_f10498	Anatase	10x	LA	1	0	1.42	3.74	0.421	0.421
sp|Q92922|SMRC1_HUMAN	AENKVENETDEGDK	14	789.352	2	Anatase_10x_LA_1_f10498	Anatase	10x	LA	1	0	2.48	3.403	0.477	0.477
sp|Q92922|SMRC1_HUMAN	AENKVENETDEGDKAQDGENEK	22	817.027	3	Anatase_10x_LA_1_f10498	Anatase	10x	LA	1	0	3.12	3.685	0.426	0.426
sp|Q92922|SMRC1_HUMAN	AENKVENETDEGDKAQDGENEK	22	613.022	4	Anatase_10x_LA_1_f10498	Anatase	10x	LA	1	0	2.3	3.481	0.324	0.324
sp|Q92922|SMRC1_HUMAN	AENKVENETDEGDKAQDGENEK	22	613.022	4	Anatase_10x_LA_1_f10498	Anatase	10x	LA	1	0	2.32	3.364	0.365	0.365
sp|Q92922|SMRC1_HUMAN	AENKVENETDEGDKAQDGENEK	22	1225.04	2	Anatase_10x_LA_1_f10498	Anatase	10x	LA	1	0	1.85	2.085	0.381	0.381
sp|Q92922|SMRC1_HUMAN	AENKVENETDEGDKAQDGENEK	22	1225.04	2	Anatase_10x_LA_1_f10498	Anatase	10x	LA	1	0	1.89	3.022	0.276	0.276
sp|P22314|UBA1_HUMAN	AENYDIPSADRHK	13	758.365	2	Anatase_10x_LA_1_f10498	Anatase	10x	LA	1	0	2.75	2.185	0.287	0.287
sp|P22314|UBA1_HUMAN	AENYDIPSADRHK	13	505.912	3	Anatase_10x_LA_1_f10498	Anatase	10x	LA	1	0	2	2.488	0.4	0.4
sp|P22314|UBA1_HUMAN	AENYDIPSADRHK	13	379.686	4	Anatase_10x_LA_1_f10498	Anatase	10x	LA	1	0	1.7	1.812	0.249	0.249
sp|Q8NE71|ABCF1_HUMAN	AEQGS#EEEGEGEEEEEEGGESKADDPYAHLSK	32	1177.8	3	Anatase_10x_LA_1_f10498	Anatase	10x	LA	1	1	1.63	4.542	0.495	0.512
sp|Q8NE71|ABCF1_HUMAN	AEQGS#EEEGEGEEEEEEGGESKADDPYAHLSK	32	1177.8	3	Anatase_10x_LA_1_f10498	Anatase	10x	LA	1	1	1.63	3.389	0.434	0.471
sp|P14735|IDE_HUMAN	AEQPHQHAMYYLR	13	548.598	3	Anatase_10x_LA_1_f10498	Anatase	10x	LA	1	0	2.93	3.131	0.439	0.439
sp|P14735|IDE_HUMAN	AEQPHQHAMYYLR	13	822.393	2	Anatase_10x_LA_1_f10498	Anatase	10x	LA	1	0	2.86	1.501	0.167	0.167
sp|Q9Y383|LC7L2_HUMAN	AERVHELNEEIGK	13	508.6	3	Anatase_10x_LA_1_f10498	Anatase	10x	LA	1	0	2.22	2.319	0.367	0.367
sp|Q9UKV3|ACINU_HUMAN	AES#PAEKVPEESVLPLVQK	19	1065.54	2	Anatase_10x_LA_1_f10498	Anatase	10x	LA	1	1	2.33	2.746	0.439	0.439
sp|Q9NTI5|PDS5B_HUMAN	AES#PESSAIESTQST#PQK	18	1018.91	2	Anatase_10x_LA_1_f10498	Anatase	10x	LA	1	1	1.89	2.933	0.042	0.305
sp|Q9NTI5|PDS5B_HUMAN	AES#PESSAIESTQSTPQK	18	978.928	2	Anatase_10x_LA_1_f10498	Anatase	10x	LA	1	1	2.65	3.913	0.177	0.536
sp|Q9BUA3|CK084_HUMAN	AES#PSPAPPPGLR	13	678.323	2	Anatase_10x_LA_1_f10498	Anatase	10x	LA	1	1	2.54	1.847	0.233	0.243
sp|Q68EM7|RHG17_HUMAN	AESSSGGGTVPSSAGILEQGPSPGDGS#PPKPK	32	1005.81	3	Anatase_10x_LA_1_f10498	Anatase	10x	LA	1	1	3.38	2.776	0.203	0.383
sp|P18858|DNLI1_HUMAN	AET#PTESVS#EPEVATK	16	917.876	2	Anatase_10x_LA_1_f10498	Anatase	10x	LA	1	1	2.45	2.534	0.164	0.491
sp|P18858|DNLI1_HUMAN	AET#PTESVS#EPEVATK	16	917.876	2	Anatase_10x_LA_1_f10498	Anatase	10x	LA	1	1	2.62	1.974	0.068	0.276
sp|P18858|DNLI1_HUMAN	AET#PTESVSEPEVATKQELQEEEEQTKPPR	30	1159.54	3	Anatase_10x_LA_1_f10498	Anatase	10x	LA	1	1	1.43	4.107	0.059	0.509
sp|Q9BTA9|WAC_HUMAN	AETHSSSTPVQHPIK	15	540.279	3	Anatase_10x_LA_1_f10498	Anatase	10x	LA	1	0	2.69	2.401	0.366	0.366
sp|Q9BTA9|WAC_HUMAN	AETHSSSTPVQHPIKPVVHPTATPSTVPSSPFTLQSDHQPK	41	871.848	5	Anatase_10x_LA_1_f10498	Anatase	10x	LA	1	0	1.42	4.121	0.25	0.25
sp|Q9Y6A5|TACC3_HUMAN	AETPHGAEEECKAETPHGAEEECR	24	908.716	3	Anatase_10x_LA_1_f10498	Anatase	10x	LA	1	0	2.68	2.766	0.224	0.224
sp|Q9Y6A5|TACC3_HUMAN	AETPHGAEEECKAETPHGAEEECR	24	681.789	4	Anatase_10x_LA_1_f10498	Anatase	10x	LA	1	0	2.65	3.256	0.298	0.298
sp|Q9Y6A5|TACC3_HUMAN	AETPHGAEEECKAETPHGAEEECR	24	908.716	3	Anatase_10x_LA_1_f10498	Anatase	10x	LA	1	0	2.54	3.386	0.392	0.392
sp|O60841|IF2P_HUMAN	AETPTAAEDDNEGDKK	16	845.876	2	Anatase_10x_LA_1_f10498	Anatase	10x	LA	1	0	2.86	2.619	0.53	0.53
sp|P51608|MECP2_HUMAN	AETSEGSGSAPAVPEAS#ASPK	21	1005.44	2	Anatase_10x_LA_1_f10498	Anatase	10x	LA	1	1	-1.03	2.242	0.069	0.322
sp|Q9P2K5|MYEF2_HUMAN	AEVPGATGGDS#PHLQPAEPPGEPR	24	816.042	3	Anatase_10x_LA_1_f10498	Anatase	10x	LA	1	1	2.84	3.194	0.18	0.439
sp|Q9P2K5|MYEF2_HUMAN	AEVPGATGGDS#PHLQPAEPPGEPR	24	1223.56	2	Anatase_10x_LA_1_f10498	Anatase	10x	LA	1	1	2.82	4.138	0.094	0.503
sp|Q9H6R4|NOL6_HUMAN	AFDHVLHLRPLSR	13	390.975	4	Anatase_10x_LA_1_f10498	Anatase	10x	LA	1	0	1.36	2.507	0.434	0.434
sp|Q9H6R4|NOL6_HUMAN	AFDHVLHLRPLSR	13	520.964	3	Anatase_10x_LA_1_f10498	Anatase	10x	LA	1	0	1.52	3.021	0.502	0.502
sp|P62316|SMD2_HUMAN	AFDRHCNMVLENVK	14	578.281	3	Anatase_10x_LA_1_f10498	Anatase	10x	LA	1	0	1.51	3.818	0.443	0.443
sp|Q92608|DOCK2_HUMAN	AFFTEEYVRDHPEDQDK	17	709.321	3	Anatase_10x_LA_1_f10498	Anatase	10x	LA	1	0	1.36	3.1	0.315	0.315
sp|P25325|THTM_HUMAN	AFGHHAVSLLDGGLR	15	517.281	3	Anatase_10x_LA_1_f10498	Anatase	10x	LA	1	0	3.26	4.047	0.45	0.45
sp|Q9Y520|PRC2C_HUMAN	AFGSGIDIKPGT#PPIAGR	18	917.47	2	Anatase_10x_LA_1_f10498	Anatase	10x	LA	1	1	3.48	2.036	0.267	0.267
sp|Q9Y520|PRC2C_HUMAN	AFGSGIDIKPGT#PPIAGR	18	611.982	3	Anatase_10x_LA_1_f10498	Anatase	10x	LA	1	1	2.84	3.384	0.471	0.471
sp|P17987|TCPA_HUMAN	AFHNEAQVNPERK	13	770.389	2	Anatase_10x_LA_1_f10498	Anatase	10x	LA	1	0	2.91	3.091	0.284	0.284
sp|P17987|TCPA_HUMAN	AFHNEAQVNPERK	13	513.928	3	Anatase_10x_LA_1_f10498	Anatase	10x	LA	1	0	2.1	3.581	0.369	0.369
sp|P17987|TCPA_HUMAN	AFHNEAQVNPERK	13	385.698	4	Anatase_10x_LA_1_f10498	Anatase	10x	LA	1	0	1.86	3.874	0.442	0.442
sp|P23634|AT2B4_HUMAN	AFHSSLHESIQK	12	461.906	3	Anatase_10x_LA_1_f10498	Anatase	10x	LA	1	0	1.84	2.368	0.324	0.324
sp|P23634|AT2B4_HUMAN	AFHSSLHESIQK	12	692.356	2	Anatase_10x_LA_1_f10498	Anatase	10x	LA	1	0	2.51	3.677	0.512	0.512
sp|P52272|HNRPM_HUMAN	AFITNIPFDVK	11	632.852	2	Anatase_10x_LA_1_f10498	Anatase	10x	LA	1	0	3.06	3.029	0.529	0.529
sp|P46013|KI67_HUMAN	AFKES#PK	7	443.708	2	Anatase_10x_LA_1_f10498	Anatase	10x	LA	1	1	1.71	1.474	0.156	0.156
sp|P36776|LONM_HUMAN	AFLM*QHAPANDYLVTSHIHLHVPEGATPK	29	642.931	5	Anatase_10x_LA_1_f10498	Anatase	10x	LA	1	0	2.71	3.076	0.44	0.44
sp|P36776|LONM_HUMAN	AFLMQHAPANDYLVTSHIHLHVPEGATPK	29	639.732	5	Anatase_10x_LA_1_f10498	Anatase	10x	LA	1	0	3.68	2.683	0.31	0.31
sp|P36776|LONM_HUMAN	AFLMQHAPANDYLVTSHIHLHVPEGATPK	29	799.412	4	Anatase_10x_LA_1_f10498	Anatase	10x	LA	1	0	2.29	3.035	0.182	0.182
sp|Q6AW86|Z324B_HUMAN	AFSHGSNLSQHRK	13	490.253	3	Anatase_10x_LA_1_f10498	Anatase	10x	LA	1	0	2.22	3.082	0.463	0.463
sp|P31939|PUR9_HUMAN	AFTHTAQYDEAISDYFRK	18	721.678	3	Anatase_10x_LA_1_f10498	Anatase	10x	LA	1	0	2.82	4.938	0.54	0.54
sp|P31939|PUR9_HUMAN	AFTHTAQYDEAISDYFRK	18	541.51	4	Anatase_10x_LA_1_f10498	Anatase	10x	LA	1	0	2.11	2.359	0.316	0.316
sp|Q07021|C1QBP_HUMAN	AFVDFLSDEIK	11	642.332	2	Anatase_10x_LA_1_f10498	Anatase	10x	LA	1	0	3.51	3.475	0.567	0.567
sp|Q07021|C1QBP_HUMAN	AFVDFLSDEIKEERK	15	609.318	3	Anatase_10x_LA_1_f10498	Anatase	10x	LA	1	0	2.84	2.235	0.472	0.472
sp|Q07021|C1QBP_HUMAN	AFVDFLSDEIKEERK	15	457.24	4	Anatase_10x_LA_1_f10498	Anatase	10x	LA	1	0	2.03	1.87	0.342	0.342
sp|Q8ND82|Z280C_HUMAN	AFVNHMMSSHSNHPGK	16	594.273	3	Anatase_10x_LA_1_f10498	Anatase	10x	LA	1	0	2.49	2.81	0.443	0.443
sp|O95365|ZBT7A_HUMAN	AGAAAGDS#DEESRADDK	17	872.839	2	Anatase_10x_LA_1_f10498	Anatase	10x	LA	1	1	2.92	3.101	0.174	0.599
sp|Q96RY5|CRML_HUMAN	AGADGPPAPPGAPQAPS#PPQGSPQDQHHFLR	31	1054.83	3	Anatase_10x_LA_1_f10498	Anatase	10x	LA	1	1	3	2.653	0.251	0.251
sp|Q9NWH9|SLTM_HUMAN	AGAGMITQHSSNAS#PINR	18	946.429	2	Anatase_10x_LA_1_f10498	Anatase	10x	LA	1	1	1.84	3.237	0.208	0.528
sp|Q9NWH9|SLTM_HUMAN	AGAGMITQHSSNAS#PINR	18	631.29	3	Anatase_10x_LA_1_f10498	Anatase	10x	LA	1	1	3.29	3.12	0.293	0.466
sp|Q8NHW5|RLA0L_HUMAN	AGAIAPCEVTVPAQNTGLGPEK	22	1090.56	2	Anatase_10x_LA_1_f10498	Anatase	10x	LA	1	0	3.42	2.534	0.344	0.344
sp|Q8NHW5|RLA0L_HUMAN	AGAIAPCEVTVPAQNTGLGPEK	22	1090.56	2	Anatase_10x_LA_1_f10498	Anatase	10x	LA	1	0	2.9	2.995	0.204	0.204
sp|P15923|TFE2_HUMAN	AGAPGALS#PSYDGGLHGLQSK	21	1031.99	2	Anatase_10x_LA_1_f10498	Anatase	10x	LA	1	1	4.78	2.843	0.078	0.601
sp|O43396|TXNL1_HUMAN	AGCECLNESDEHGFDNCLRK	20	603.502	4	Anatase_10x_LA_1_f10498	Anatase	10x	LA	1	0	2.01	3.527	0.442	0.442
sp|O43396|TXNL1_HUMAN	AGCECLNESDEHGFDNCLRK	20	804.333	3	Anatase_10x_LA_1_f10498	Anatase	10x	LA	1	0	2.04	4.447	0.54	0.54
sp|O43396|TXNL1_HUMAN	AGCECLNESDEHGFDNCLRK	20	1205.99	2	Anatase_10x_LA_1_f10498	Anatase	10x	LA	1	0	-1.09	2.441	0.409	0.409
sp|P21912|SDHB_HUMAN	AGDKPHM*QTYEVDLNK	16	621.298	3	Anatase_10x_LA_1_f10498	Anatase	10x	LA	1	0	2.26	4.394	0.529	0.529
sp|P21912|SDHB_HUMAN	AGDKPHM*QTYEVDLNK	16	931.443	2	Anatase_10x_LA_1_f10498	Anatase	10x	LA	1	0	2.37	3.999	0.511	0.511
sp|P21912|SDHB_HUMAN	AGDKPHM*QTYEVDLNK	16	466.225	4	Anatase_10x_LA_1_f10498	Anatase	10x	LA	1	0	1.51	3.11	0.321	0.321
sp|P21912|SDHB_HUMAN	AGDKPHMQTYEVDLNK	16	462.226	4	Anatase_10x_LA_1_f10498	Anatase	10x	LA	1	0	1.52	2.498	0.292	0.292
sp|P21912|SDHB_HUMAN	AGDKPHMQTYEVDLNK	16	923.446	2	Anatase_10x_LA_1_f10498	Anatase	10x	LA	1	0	2.35	4.645	0.512	0.512
sp|P21912|SDHB_HUMAN	AGDKPHMQTYEVDLNK	16	615.966	3	Anatase_10x_LA_1_f10498	Anatase	10x	LA	1	0	1.76	4.983	0.55	0.55
sp|P51858|HDGF_HUMAN	AGDLLEDS#PK	10	562.748	2	Anatase_10x_LA_1_f10498	Anatase	10x	LA	1	1	1.97	2.621	0.452	0.452
sp|P51858|HDGF_HUMAN	AGDLLEDS#PKRPK	13	753.374	2	Anatase_10x_LA_1_f10498	Anatase	10x	LA	1	1	2.58	2.032	0.406	0.406
sp|P51858|HDGF_HUMAN	AGDLLEDS#PKRPK	13	502.585	3	Anatase_10x_LA_1_f10498	Anatase	10x	LA	1	1	2.32	2.251	0.294	0.294
sp|P12956|XRCC6_HUMAN	AGDLRDTGIFLDLMHLK	17	639.011	3	Anatase_10x_LA_1_f10498	Anatase	10x	LA	1	0	3.94	3.346	0.421	0.421
sp|Q96S55|WRIP1_HUMAN	AGEEHYNCISALHK	14	543.588	3	Anatase_10x_LA_1_f10498	Anatase	10x	LA	1	0	1.43	3.866	0.444	0.444
sp|Q96S55|WRIP1_HUMAN	AGEEHYNCISALHK	14	814.878	2	Anatase_10x_LA_1_f10498	Anatase	10x	LA	1	0	-0.49	2.533	0.246	0.246
sp|Q96S55|WRIP1_HUMAN	AGEEHYNCISALHK	14	407.943	4	Anatase_10x_LA_1_f10498	Anatase	10x	LA	1	0	1.17	3.004	0.128	0.128
sp|Q08J23|NSUN2_HUMAN	AGEPNS#PDAEEANS#PDVTAGCDPAGVHPPR	30	1058.76	3	Anatase_10x_LA_1_f10498	Anatase	10x	LA	1	1	2.28	4.43	0.251	0.587
sp|Q08J23|NSUN2_HUMAN	AGEPNS#PDAEEANS#PDVTAGCDPAGVHPPR	30	1058.76	3	Anatase_10x_LA_1_f10498	Anatase	10x	LA	1	1	2.26	4.569	0.19	0.648
sp|Q08J23|NSUN2_HUMAN	AGEPNS#PDAEEANS#PDVTAGCDPAGVHPPR	30	1058.76	3	Anatase_10x_LA_1_f10498	Anatase	10x	LA	1	1	2.42	3.238	0.172	0.442
sp|Q08J23|NSUN2_HUMAN	AGEPNSPDAEEANS#PDVTAGCDPAGVHPPR	30	1032.1	3	Anatase_10x_LA_1_f10498	Anatase	10x	LA	1	1	3.49	3.135	0.26	0.503
sp|Q08J23|NSUN2_HUMAN	AGEPNSPDAEEANS#PDVTAGCDPAGVHPPR	30	1032.1	3	Anatase_10x_LA_1_f10498	Anatase	10x	LA	1	1	1.07	3.408	0.301	0.428
sp|Q93009|UBP7_HUMAN	AGEQQLS#EPEDMEMEAGDTDDPPR	24	1364.03	2	Anatase_10x_LA_1_f10498	Anatase	10x	LA	1	1	2.28	2.261	0.381	0.381
sp|P13639|EF2_HUMAN	AGET#RFTDT#RKDEQER	16	1049.94	2	Anatase_10x_LA_1_f10498	Anatase	10x	LA	1	1	2.15	1.633	0.142	0.34
sp|Q15233|NONO_HUMAN	AGEVFIHK	8	450.751	2	Anatase_10x_LA_1_f10498	Anatase	10x	LA	1	0	1.66	2.258	0.287	0.287
sp|P60709|ACTB_HUMAN	AGFAGDDAPR	10	488.729	2	Anatase_10x_LA_1_f10498	Anatase	10x	LA	1	0	2.2	2.939	0.476	0.476
sp|Q86XL3|ANKL2_HUMAN	AGFLHHVK	8	454.759	2	Anatase_10x_LA_1_f10498	Anatase	10x	LA	1	0	1.71	2.406	0.365	0.365
sp|O15234|CASC3_HUMAN	AGFRPVEAGGQHGGR	15	499.256	3	Anatase_10x_LA_1_f10498	Anatase	10x	LA	1	0	1.66	3.85	0.376	0.376
sp|Q9P258|RCC2_HUMAN	AGGAAVVITEPEHTK	15	740.396	2	Anatase_10x_LA_1_f10498	Anatase	10x	LA	1	0	2.67	3.068	0.264	0.264
sp|Q8IU81|I2BP1_HUMAN	AGGAS#PAASSTAQPPTQHR	19	624.62	3	Anatase_10x_LA_1_f10498	Anatase	10x	LA	1	1	3.07	2.681	0.169	0.169
sp|Q9Y606|TRUA_HUMAN	AGGDRVWEDGEHPAK	15	406.694	4	Anatase_10x_LA_1_f10498	Anatase	10x	LA	1	0	1.63	2.633	0.315	0.315
sp|Q9Y606|TRUA_HUMAN	AGGDRVWEDGEHPAKK	16	584.621	3	Anatase_10x_LA_1_f10498	Anatase	10x	LA	1	0	2.05	2.91	0.331	0.331
sp|Q9Y606|TRUA_HUMAN	AGGDRVWEDGEHPAKK	16	584.621	3	Anatase_10x_LA_1_f10498	Anatase	10x	LA	1	0	1.91	2.718	0.274	0.274
sp|Q5JTZ9|SYAM_HUMAN	AGGHHNDLEDVGR	13	688.82	2	Anatase_10x_LA_1_f10498	Anatase	10x	LA	1	0	2.6	2.853	0.374	0.374
##sp|Q9BXL8|CDCA4_HUMAN	AGGMMGT#LVT#DLDY#YPSDVDSFLEEMCSPNK	31	1228.13	3	Anatase_10x_LA_1_f10498	Anatase	10x	LA	1	1	1	2.619	0.128	0.278
sp|Q9NU22|MDN1_HUMAN	AGGQINHDLHER	12	673.833	2	Anatase_10x_LA_1_f10498	Anatase	10x	LA	1	0	2.34	2.946	0.42	0.42
sp|Q92522|H1X_HUMAN	AGGSAALS#PSK	11	513.238	2	Anatase_10x_LA_1_f10498	Anatase	10x	LA	1	1	2.12	3.17	0.109	0.616
sp|Q92522|H1X_HUMAN	AGGSAALSPS#KK	12	577.286	2	Anatase_10x_LA_1_f10498	Anatase	10x	LA	1	1	2.98	2.163	0.018	0.246
sp|P78559|MAP1A_HUMAN	AGGVSGTHHPRPGHDPPPLPQPDPR	25	516.064	5	Anatase_10x_LA_1_f10498	Anatase	10x	LA	1	0	2.25	1.884	0.296	0.296
sp|Q9BQA9|CQ062_HUMAN	AGHDQVVVLLHDVR	14	519.956	3	Anatase_10x_LA_1_f10498	Anatase	10x	LA	1	0	2.15	3.034	0.358	0.358
sp|O94966|UBP19_HUMAN	AGHSEHHPDLGPAAEAAASQASR	23	756.359	3	Anatase_10x_LA_1_f10498	Anatase	10x	LA	1	0	3.13	4.515	0.528	0.528
sp|P13639|EF2_HUMAN	AGIIASAR	8	379.73	2	Anatase_10x_LA_1_f10498	Anatase	10x	LA	1	0	1.56	2.378	0.202	0.202
sp|Q15223|PVRL1_HUMAN	AGIPQHHPPMAQNLQYPDDS#DDEK	24	928.4	3	Anatase_10x_LA_1_f10498	Anatase	10x	LA	1	1	3.17	4.822	0.308	0.478
sp|Q15223|PVRL1_HUMAN	AGIPQHHPPMAQNLQYPDDS#DDEKK	25	971.096	3	Anatase_10x_LA_1_f10498	Anatase	10x	LA	1	1	0.37	4.247	0.308	0.528
sp|Q99808|S29A1_HUMAN	AGKEESGVSVSNSQPTNESHSIK	23	791.384	3	Anatase_10x_LA_1_f10498	Anatase	10x	LA	1	0	2.72	6	0.548	0.548
sp|Q99808|S29A1_HUMAN	AGKEESGVSVSNSQPTNESHSIK	23	593.79	4	Anatase_10x_LA_1_f10498	Anatase	10x	LA	1	0	2.04	2.551	0.188	0.188
sp|Q99808|S29A1_HUMAN	AGKEESGVSVSNSQPTNESHSIK	23	1186.57	2	Anatase_10x_LA_1_f10498	Anatase	10x	LA	1	0	2.01	2.994	0.486	0.486
sp|P62906|RL10A_HUMAN	AGKFPSLLTHNENM*VAK	17	624.994	3	Anatase_10x_LA_1_f10498	Anatase	10x	LA	1	0	2.1	2.067	0.188	0.188
sp|P62906|RL10A_HUMAN	AGKFPSLLTHNENMVAK	17	464.998	4	Anatase_10x_LA_1_f10498	Anatase	10x	LA	1	0	1.65	4.215	0.494	0.494
sp|P35579|MYH9_HUMAN	AGKLDPHLVLDQLR	14	525.64	3	Anatase_10x_LA_1_f10498	Anatase	10x	LA	1	0	2.8	1.849	0.525	0.525
sp|P35579|MYH9_HUMAN	AGKLDPHLVLDQLR	14	787.957	2	Anatase_10x_LA_1_f10498	Anatase	10x	LA	1	0	3.05	3.018	0.601	0.601
sp|P14618|KPYM_HUMAN	AGKPVICATQM*LESMIK	17	631.662	3	Anatase_10x_LA_1_f10498	Anatase	10x	LA	1	0	3.49	3.678	0.092	0.302
sp|P14618|KPYM_HUMAN	AGKPVICATQMLESM*IK	17	631.662	3	Anatase_10x_LA_1_f10498	Anatase	10x	LA	1	0	3.8	4.29	0.321	0.489
sp|P14618|KPYM_HUMAN	AGKPVICATQMLESMIK	17	626.33	3	Anatase_10x_LA_1_f10498	Anatase	10x	LA	1	0	3.94	4.13	0.496	0.496
sp|O60832|DKC1_HUMAN	AGLESGAEPGDGDS#DTTKK	19	957.904	2	Anatase_10x_LA_1_f10498	Anatase	10x	LA	1	1	1.83	3.235	0.082	0.517
sp|O60832|DKC1_HUMAN	AGLESGAEPGDGDS#DTTKK	19	957.904	2	Anatase_10x_LA_1_f10498	Anatase	10x	LA	1	1	2.25	4.179	0.097	0.473
sp|O60832|DKC1_HUMAN	AGLESGAEPGDGDSDTT#K	18	893.857	2	Anatase_10x_LA_1_f10498	Anatase	10x	LA	1	1	2.9	2.819	0.002	0.452
sp|Q9H6F5|CCD86_HUMAN	AGLGSPERPPKTS#PGSPR	18	624.311	3	Anatase_10x_LA_1_f10498	Anatase	10x	LA	1	1	1.23	3.029	0.093	0.428
sp|Q9UKN8|TF3C4_HUMAN	AGLNVHNSHVTGLHSLPIVSM*TADK	25	654.343	4	Anatase_10x_LA_1_f10498	Anatase	10x	LA	1	0	3.03	2.324	0.222	0.222
sp|Q9UKN8|TF3C4_HUMAN	AGLNVHNSHVTGLHSLPIVSMTADK	25	650.343	4	Anatase_10x_LA_1_f10498	Anatase	10x	LA	1	0	2.25	4.117	0.45	0.45
sp|Q96KM6|Z512B_HUMAN	AGLNYHTMAEHSAKPSDAEASEGGEQEERER	31	678.107	5	Anatase_10x_LA_1_f10498	Anatase	10x	LA	1	0	2.99	4.745	0.402	0.402
sp|Q96KM6|Z512B_HUMAN	AGLNYHTMAEHSAKPSDAEASEGGEQEERER	31	847.381	4	Anatase_10x_LA_1_f10498	Anatase	10x	LA	1	0	2.43	4.066	0.418	0.418
sp|Q16777|H2A2C_HUMAN	AGLQFPVGR	9	472.77	2	Anatase_10x_LA_1_f10498	Anatase	10x	LA	1	0	2.14	2.674	0.357	0.357
sp|Q14692|BMS1_HUMAN	AGLS#PANCQSDRVNLEK	17	646.965	3	Anatase_10x_LA_1_f10498	Anatase	10x	LA	1	1	2.69	1.661	0.256	0.256
sp|Q8NHH9|ATLA2_HUMAN	AGLTDQVSHHAR	12	431.222	3	Anatase_10x_LA_1_f10498	Anatase	10x	LA	1	0	1.39	2.063	0.187	0.187
sp|Q14558|KPRA_HUMAN	AGLTHIITM*DLHQK	14	531.953	3	Anatase_10x_LA_1_f10498	Anatase	10x	LA	1	0	2.05	3.367	0	0.487
sp|Q14558|KPRA_HUMAN	AGLTHIITM*DLHQK	14	399.217	4	Anatase_10x_LA_1_f10498	Anatase	10x	LA	1	0	1.76	2.173	0	0.3
sp|Q14558|KPRA_HUMAN	AGLTHIITMDLHQK	14	395.218	4	Anatase_10x_LA_1_f10498	Anatase	10x	LA	1	0	1.95	1.59	0	0.288
sp|Q14558|KPRA_HUMAN	AGLTHIITMDLHQK	14	526.622	3	Anatase_10x_LA_1_f10498	Anatase	10x	LA	1	0	2.55	3.173	0	0.486
sp|Q14558|KPRA_HUMAN	AGLTHIITMDLHQK	14	395.218	4	Anatase_10x_LA_1_f10498	Anatase	10x	LA	1	0	1.78	3.549	0	0.523
sp|Q9UQ35|SRRM2_HUMAN	AGM*SSNQSIS#SPVLDAVPRT#PSRER	25	940.094	3	Anatase_10x_LA_1_f10498	Anatase	10x	LA	1	1	3.07	3.373	0.039	0.381
sp|Q9UQ35|SRRM2_HUMAN	AGM*SSNQSISSPVLDAVPRT#PSRER	25	913.439	3	Anatase_10x_LA_1_f10498	Anatase	10x	LA	1	1	3.07	2.757	0.106	0.295
sp|Q9UQ35|SRRM2_HUMAN	AGMSSNQSIS#SPVLDAVPRT#PSR	23	839.713	3	Anatase_10x_LA_1_f10498	Anatase	10x	LA	1	1	1.78	5.04	0.005	0.405
sp|Q9UQ35|SRRM2_HUMAN	AGMSSNQSISS#PVLDAVPRT#PSRER	25	934.763	3	Anatase_10x_LA_1_f10498	Anatase	10x	LA	1	1	3.32	3.386	0.015	0.375
##sp|Q04721|NOTC2_HUMAN	AGNLCPTS#SCDDIDIQCVPGT#FGPPCLCQFRNVK	34	1348.56	3	Anatase_10x_LA_1_f10498	Anatase	10x	LA	1	1	2.54	2.742	0.035	0.304
sp|P35268|RL22_HUMAN	AGNLGGGVVTIER	13	621.845	2	Anatase_10x_LA_1_f10498	Anatase	10x	LA	1	0	2.11	2.304	0.338	0.338
sp|O60506|HNRPQ_HUMAN	AGPIWDLR	8	464.257	2	Anatase_10x_LA_1_f10498	Anatase	10x	LA	1	0	1.45	1.844	0.286	0.286
sp|Q9HCC6|HES4_HUMAN	AGPQGPGGPWR	11	540.274	2	Anatase_10x_LA_1_f10498	Anatase	10x	LA	1	0	1.89	1.353	0.168	0.168
sp|P29372|3MG_HUMAN	AGQPHSSSDAAQAPAEQPHSSSDAAQAPCPR	31	1038.47	3	Anatase_10x_LA_1_f10498	Anatase	10x	LA	1	0	2.69	3.782	0.369	0.369
sp|P29372|3MG_HUMAN	AGQPHSSSDAAQAPAEQPHSSSDAAQAPCPR	31	1038.47	3	Anatase_10x_LA_1_f10498	Anatase	10x	LA	1	0	3.07	4.149	0.5	0.5
sp|Q92619|HMHA1_HUMAN	AGS#PSPQPSGELPRK	15	794.383	2	Anatase_10x_LA_1_f10498	Anatase	10x	LA	1	1	3.65	2.117	0.141	0.28
sp|O15027|SC16A_HUMAN	AGSALPGFANSPAGST#SVVLVPPAHGTLVPDGNK	34	1089.22	3	Anatase_10x_LA_1_f10498	Anatase	10x	LA	1	1	3.45	3.09	0.008	0.274
sp|Q02241|KIF23_HUMAN	AGSQLGPGYQHHAQPK	16	559.283	3	Anatase_10x_LA_1_f10498	Anatase	10x	LA	1	0	2	1.865	0.265	0.265
sp|Q02241|KIF23_HUMAN	AGSQLGPGYQHHAQPK	16	838.42	2	Anatase_10x_LA_1_f10498	Anatase	10x	LA	1	0	1.72	2.842	0.502	0.502
sp|Q86XP3|DDX42_HUMAN	AGSSAAGASGWTSAGSLNSVPTNSAQQGHNS#PDSPVTSAAK	41	1298.25	3	Anatase_10x_LA_1_f10498	Anatase	10x	LA	1	1	2.3	3.564	0.078	0.289
sp|Q7Z6Z7|HUWE1_HUMAN	AGSST#PGDAPPAVAEVQGR	19	923.922	2	Anatase_10x_LA_1_f10498	Anatase	10x	LA	1	1	1.98	2.31	0.035	0.378
sp|Q92882|OSTF1_HUMAN	AGSTALYWACHGGHK	15	539.254	3	Anatase_10x_LA_1_f10498	Anatase	10x	LA	1	0	2.55	1.911	0.276	0.276
sp|Q92882|OSTF1_HUMAN	AGSTALYWACHGGHK	15	404.692	4	Anatase_10x_LA_1_f10498	Anatase	10x	LA	1	0	1.39	2.169	0.334	0.334
sp|O43379|WDR62_HUMAN	AGTGY#ASPDRTHVLAAGK	18	926.443	2	Anatase_10x_LA_1_f10498	Anatase	10x	LA	1	1	2.08	2.236	0.034	0.347
sp|O43379|WDR62_HUMAN	AGTGYAS#PDRTHVLAAGK	18	617.964	3	Anatase_10x_LA_1_f10498	Anatase	10x	LA	1	1	2.11	2.278	0.06	0.311
sp|P10644|KAP0_HUMAN	AGTRTDSREDEIS#PPPPNPVVK	22	814.729	3	Anatase_10x_LA_1_f10498	Anatase	10x	LA	1	1	2.64	2.703	0.249	0.249
sp|O75369|FLNB_HUMAN	AGVENGKPTHFTVYTK	16	583.638	3	Anatase_10x_LA_1_f10498	Anatase	10x	LA	1	0	1.8	2.408	0.327	0.327
sp|P35579|MYH9_HUMAN	AGVLAHLEEERDLK	14	527.287	3	Anatase_10x_LA_1_f10498	Anatase	10x	LA	1	0	2.16	2.49	0.263	0.263
sp|P35579|MYH9_HUMAN	AGVLAHLEEERDLK	14	790.428	2	Anatase_10x_LA_1_f10498	Anatase	10x	LA	1	0	2.48	3.268	0.375	0.375
sp|P35579|MYH9_HUMAN	AGVLAHLEEERDLK	14	395.717	4	Anatase_10x_LA_1_f10498	Anatase	10x	LA	1	0	2.15	2.292	0.307	0.307
sp|Q6NXE6|ARMC6_HUMAN	AGVLPLLTGAITHHGHHTDVVR	22	461.058	5	Anatase_10x_LA_1_f10498	Anatase	10x	LA	1	0	2.09	2.688	0.353	0.353
sp|Q6NXE6|ARMC6_HUMAN	AGVLPLLTGAITHHGHHTDVVR	22	767.759	3	Anatase_10x_LA_1_f10498	Anatase	10x	LA	1	0	2.17	2.366	0.252	0.252
sp|P62424|RL7A_HUMAN	AGVNTVTTLVENKK	14	491.948	3	Anatase_10x_LA_1_f10498	Anatase	10x	LA	1	0	1.32	2.518	0.44	0.44
sp|P26358|DNMT1_HUMAN	AGVQADEDEDGDEKDEKK	18	495.219	4	Anatase_10x_LA_1_f10498	Anatase	10x	LA	1	0	1.85	3.865	0.304	0.304
sp|P26358|DNMT1_HUMAN	AGVQADEDEDGDEKDEKK	18	989.432	2	Anatase_10x_LA_1_f10498	Anatase	10x	LA	1	0	2.03	5.647	0.582	0.582
sp|P26358|DNMT1_HUMAN	AGVQADEDEDGDEKDEKK	18	659.957	3	Anatase_10x_LA_1_f10498	Anatase	10x	LA	1	0	2.35	3.567	0.423	0.423
sp|P51116|FXR2_HUMAN	AGYST#DESSSSSLHATR	17	918.378	2	Anatase_10x_LA_1_f10498	Anatase	10x	LA	1	1	2.3	2.388	0.007	0.379
sp|P46777|RL5_HUMAN	AHAAIRENPVYEK	13	499.933	3	Anatase_10x_LA_1_f10498	Anatase	10x	LA	1	0	2.06	2.299	0.339	0.339
sp|Q9BQA1|MEP50_HUMAN	AHAAQVTCVAASPHK	15	516.597	3	Anatase_10x_LA_1_f10498	Anatase	10x	LA	1	0	1.84	3.648	0.594	0.594
sp|Q9BQA1|MEP50_HUMAN	AHAAQVTCVAASPHK	15	774.392	2	Anatase_10x_LA_1_f10498	Anatase	10x	LA	1	0	1.81	3.314	0.63	0.63
sp|Q6PCB5|RSBNL_HUMAN	AHADHIGQGFER	12	446.55	3	Anatase_10x_LA_1_f10498	Anatase	10x	LA	1	0	1.78	2.54	0.321	0.321
sp|Q6PCB5|RSBNL_HUMAN	AHADHIGQGFER	12	669.323	2	Anatase_10x_LA_1_f10498	Anatase	10x	LA	1	0	2.52	3.34	0.592	0.592
sp|Q5VWQ0|RSBN1_HUMAN	AHADHVGQGFDWQSTAAVGVLK	22	765.383	3	Anatase_10x_LA_1_f10498	Anatase	10x	LA	1	0	1.26	4.002	0.478	0.478
sp|Q14697|GANAB_HUMAN	AHAHLDTGR	9	489.25	2	Anatase_10x_LA_1_f10498	Anatase	10x	LA	1	0	1.82	1.434	0.357	0.357
sp|Q14697|GANAB_HUMAN	AHAHLDTGRREPWLLPSQHNDIIR	24	567.302	5	Anatase_10x_LA_1_f10498	Anatase	10x	LA	1	0	1.83	3.961	0.58	0.58
sp|Q00653|NFKB2_HUMAN	AHAHSLVGK	9	460.26	2	Anatase_10x_LA_1_f10498	Anatase	10x	LA	1	0	2.46	2.466	0.468	0.468
sp|Q9UGU0|TCF20_HUMAN	AHAYGDPNAGLNSQLHYK	18	652.651	3	Anatase_10x_LA_1_f10498	Anatase	10x	LA	1	0	1.94	4.237	0.449	0.449
sp|Q9UK73|FEM1B_HUMAN	AHCGATALHFAAEAGHIDIVK	21	548.03	4	Anatase_10x_LA_1_f10498	Anatase	10x	LA	1	0	3.01	4.427	0.632	0.632
sp|P43403|ZAP70_HUMAN	AHCGPAELCEFYSRDPDGLPCNLRK	25	741.342	4	Anatase_10x_LA_1_f10498	Anatase	10x	LA	1	0	2.79	2.994	0.456	0.456
sp|P43403|ZAP70_HUMAN	AHCGPAELCEFYSRDPDGLPCNLRK	25	741.342	4	Anatase_10x_LA_1_f10498	Anatase	10x	LA	1	0	2.68	3.304	0.361	0.361
sp|Q05048|CSTF1_HUMAN	AHDGAEVCSAIFSK	14	746.351	2	Anatase_10x_LA_1_f10498	Anatase	10x	LA	1	0	2.89	2.782	0.509	0.509
sp|O75083|WDR1_HUMAN	AHDGGIYAISWSPDSTHLLSASGDK	25	862.416	3	Anatase_10x_LA_1_f10498	Anatase	10x	LA	1	0	2.51	6.204	0.625	0.625
sp|O75083|WDR1_HUMAN	AHDGGIYAISWSPDSTHLLSASGDK	25	647.064	4	Anatase_10x_LA_1_f10498	Anatase	10x	LA	1	0	3.24	3.656	0.337	0.337
sp|O75083|WDR1_HUMAN	AHDGGIYAISWSPDSTHLLSASGDK	25	1293.12	2	Anatase_10x_LA_1_f10498	Anatase	10x	LA	1	0	3.27	5.033	0.572	0.572
sp|P55199|ELL_HUMAN	AHDPLADVSNDLGHSGRDCEHGEAAAPAPTVR	32	665.313	5	Anatase_10x_LA_1_f10498	Anatase	10x	LA	1	0	2.68	3.707	0.434	0.434
sp|Q8NB16|MLKL_HUMAN	AHDPSVRPSVDEILKK	16	448.5	4	Anatase_10x_LA_1_f10498	Anatase	10x	LA	1	0	1.88	2.747	0.338	0.338
sp|Q9P2G1|AKIB1_HUMAN	AHDWDREK	8	528.747	2	Anatase_10x_LA_1_f10498	Anatase	10x	LA	1	0	1.83	1.774	0.168	0.168
sp|P50990|TCPQ_HUMAN	AHEILPNLVCCSAK	14	806.405	2	Anatase_10x_LA_1_f10498	Anatase	10x	LA	1	0	3.1	2.858	0.516	0.516
sp|P21333|FLNA_HUMAN	AHEPTYFTVDCAEAGQGDVSIGIK	24	855.737	3	Anatase_10x_LA_1_f10498	Anatase	10x	LA	1	0	1.06	2.648	0.225	0.225
sp|P57075|UBS3A_HUMAN	AHEVFPHVTLCDFFTCEDQK	20	620.783	4	Anatase_10x_LA_1_f10498	Anatase	10x	LA	1	0	4.2	3.182	0.35	0.35
sp|P15289|ARSA_HUMAN	AHFFTQGSAHSDTTADPACHASSSLTAHEPPLLYDLSK	38	1017.73	4	Anatase_10x_LA_1_f10498	Anatase	10x	LA	1	0	2.53	3.065	0.227	0.227
sp|Q15102|PA1B3_HUMAN	AHFLDADPGFVHSDGTISHHDM*YDYLHLSR	30	694.721	5	Anatase_10x_LA_1_f10498	Anatase	10x	LA	1	0	2.64	3.208	0.348	0.348
sp|Q15102|PA1B3_HUMAN	AHFLDADPGFVHSDGTISHHDMYDYLHLSR	30	691.522	5	Anatase_10x_LA_1_f10498	Anatase	10x	LA	1	0	2.69	3.34	0.431	0.431
sp|Q8WUA4|TF3C2_HUMAN	AHFNAMFQPSS#PTRRPGFS#PTSHR	24	719.069	4	Anatase_10x_LA_1_f10498	Anatase	10x	LA	1	1	2.3	2.461	0.033	0.509
sp|Q8WUA4|TF3C2_HUMAN	AHFNAMFQPSSPT#RRPGFSPTSHR	24	699.078	4	Anatase_10x_LA_1_f10498	Anatase	10x	LA	1	1	2.35	2.199	0.049	0.247
sp|Q9UHI6|DDX20_HUMAN	AHGDHM*ASSR	10	542.735	2	Anatase_10x_LA_1_f10498	Anatase	10x	LA	1	0	3.54	1.663	0.568	0.568
sp|Q96N67|DOCK7_HUMAN	AHGELHEQFK	10	598.298	2	Anatase_10x_LA_1_f10498	Anatase	10x	LA	1	0	2.16	2.538	0.395	0.395
sp|A5YKK6|CNOT1_HUMAN	AHGGPNFMMHSGISQASEYDDPPGLR	26	693.564	4	Anatase_10x_LA_1_f10498	Anatase	10x	LA	1	0	2.22	3.997	0.357	0.357
sp|P06576|ATPB_HUMAN	AHGGYSVFAGVGER	14	703.846	2	Anatase_10x_LA_1_f10498	Anatase	10x	LA	1	0	2.47	3.004	0.631	0.631
sp|P06576|ATPB_HUMAN	AHGGYSVFAGVGER	14	469.566	3	Anatase_10x_LA_1_f10498	Anatase	10x	LA	1	0	2.09	3.323	0.279	0.279
sp|O00116|ADAS_HUMAN	AHGHCLHEIFLLR	13	401.464	4	Anatase_10x_LA_1_f10498	Anatase	10x	LA	1	0	1.56	2.703	0.367	0.367
sp|O00116|ADAS_HUMAN	AHGHCLHEIFLLR	13	801.922	2	Anatase_10x_LA_1_f10498	Anatase	10x	LA	1	0	2.68	2.304	0.215	0.215
sp|O00116|ADAS_HUMAN	AHGHCLHEIFLLR	13	534.95	3	Anatase_10x_LA_1_f10498	Anatase	10x	LA	1	0	2.02	2.466	0.484	0.484
sp|Q6YHU6|THADA_HUMAN	AHGHLQSATDTWENLVSDAR	20	736.688	3	Anatase_10x_LA_1_f10498	Anatase	10x	LA	1	0	3.65	4.468	0.504	0.504
sp|Q6YHU6|THADA_HUMAN	AHGHLQSATDTWENLVSDAR	20	552.767	4	Anatase_10x_LA_1_f10498	Anatase	10x	LA	1	0	1.55	3.484	0.308	0.308
sp|O75369|FLNB_HUMAN	AHGPGLEGGLVGKPAEFTIDTK	22	732.056	3	Anatase_10x_LA_1_f10498	Anatase	10x	LA	1	0	2.08	3.272	0.486	0.486
sp|O75369|FLNB_HUMAN	AHGPGLEGGLVGKPAEFTIDTK	22	549.294	4	Anatase_10x_LA_1_f10498	Anatase	10x	LA	1	0	1.96	3.328	0.422	0.422
sp|O75369|FLNB_HUMAN	AHGPGLEGGLVGKPAEFTIDTK	22	1097.58	2	Anatase_10x_LA_1_f10498	Anatase	10x	LA	1	0	1.91	3.248	0.451	0.451
sp|Q5W0Z9|ZDH20_HUMAN	AHHCSACDSCILK	13	779.833	2	Anatase_10x_LA_1_f10498	Anatase	10x	LA	1	0	1.87	1.668	0.173	0.173
sp|Q5W0Z9|ZDH20_HUMAN	AHHCSACDSCILK	13	520.224	3	Anatase_10x_LA_1_f10498	Anatase	10x	LA	1	0	1.51	3.711	0.505	0.505
sp|Q9HAD4|WDR41_HUMAN	AHHDIVR	7	424.231	2	Anatase_10x_LA_1_f10498	Anatase	10x	LA	1	0	1.81	1.585	0.344	0.344
sp|Q99447|PCY2_HUMAN	AHHSSQEMSSEYR	13	516.889	3	Anatase_10x_LA_1_f10498	Anatase	10x	LA	1	0	2.15	2.904	0.314	0.314
sp|Q96HA1|P121A_HUMAN	AHHVYPSLPTPLLRPSR	17	486.027	4	Anatase_10x_LA_1_f10498	Anatase	10x	LA	1	0	2.33	2.585	0.33	0.33
sp|O75369|FLNB_HUMAN	AHIANPSGASTECFVTDNADGTYQVEYTPFEK	32	1173.86	3	Anatase_10x_LA_1_f10498	Anatase	10x	LA	1	0	2.59	6.249	0.574	0.574
sp|Q00610|CLH1_HUMAN	AHIAQLCEK	9	535.278	2	Anatase_10x_LA_1_f10498	Anatase	10x	LA	1	0	2.21	2.414	0.623	0.623
sp|Q9UBK9|UXT_HUMAN	AHIHMLLEGLR	11	430.577	3	Anatase_10x_LA_1_f10498	Anatase	10x	LA	1	0	1.67	4.374	0.432	0.432
sp|P30520|PURA2_HUMAN	AHIVFDFHQAADGIQEQQR	19	737.365	3	Anatase_10x_LA_1_f10498	Anatase	10x	LA	1	0	2.97	6.168	0.634	0.634
sp|P30520|PURA2_HUMAN	AHIVFDFHQAADGIQEQQR	19	1105.54	2	Anatase_10x_LA_1_f10498	Anatase	10x	LA	1	0	2.97	3.899	0.624	0.624
sp|P30520|PURA2_HUMAN	AHIVFDFHQAADGIQEQQRQEQAGK	25	713.604	4	Anatase_10x_LA_1_f10498	Anatase	10x	LA	1	0	2.77	3.306	0.389	0.389
sp|P30520|PURA2_HUMAN	AHIVFDFHQAADGIQEQQRQEQAGK	25	951.136	3	Anatase_10x_LA_1_f10498	Anatase	10x	LA	1	0	2.74	4.418	0.523	0.523
sp|Q8N2M8|CLASR_HUMAN	AHLDHIPDYTPPLLTT#ISPEQESDERK	27	796.383	4	Anatase_10x_LA_1_f10498	Anatase	10x	LA	1	1	2.29	2.812	0.018	0.303
sp|Q8N2M8|CLASR_HUMAN	AHLDHIPDYTPPLLTTIS#PEQESDERK	27	1061.51	3	Anatase_10x_LA_1_f10498	Anatase	10x	LA	1	1	4.93	3.439	0.159	0.373
sp|Q8N2M8|CLASR_HUMAN	AHLDHIPDYTPPLLTTISPEQESDERK	27	776.392	4	Anatase_10x_LA_1_f10498	Anatase	10x	LA	1	0	3.19	3.235	0.323	0.323
sp|Q8N2M8|CLASR_HUMAN	AHLDHIPDYTPPLLTTISPEQESDERK	27	776.392	4	Anatase_10x_LA_1_f10498	Anatase	10x	LA	1	0	2.48	3.147	0.271	0.271
sp|Q8N2M8|CLASR_HUMAN	AHLDHIPDYTPPLLTTISPEQESDERK	27	621.315	5	Anatase_10x_LA_1_f10498	Anatase	10x	LA	1	0	2.29	2.813	0.239	0.239
sp|Q8N2M8|CLASR_HUMAN	AHLDHIPDYTPPLLTTISPEQESDERK	27	1034.85	3	Anatase_10x_LA_1_f10498	Anatase	10x	LA	1	0	2.89	5.494	0.486	0.486
sp|P62266|RS23_HUMAN	AHLGTALK	8	405.746	2	Anatase_10x_LA_1_f10498	Anatase	10x	LA	1	0	1.64	2.264	0.113	0.113
sp|Q9H993|ARMT1_HUMAN	AHLILFK	7	421.269	2	Anatase_10x_LA_1_f10498	Anatase	10x	LA	1	0	1.45	1.908	0.48	0.48
sp|P34897|GLYM_HUMAN	AHLLADM*AHISGLVAAK	17	578.652	3	Anatase_10x_LA_1_f10498	Anatase	10x	LA	1	0	2.49	2.788	0.458	0.458
sp|P34897|GLYM_HUMAN	AHLLADMAHISGLVAAK	17	859.477	2	Anatase_10x_LA_1_f10498	Anatase	10x	LA	1	0	2.92	5.353	0.645	0.645
sp|P34897|GLYM_HUMAN	AHLLADMAHISGLVAAK	17	430.242	4	Anatase_10x_LA_1_f10498	Anatase	10x	LA	1	0	1.71	3.468	0.508	0.508
sp|P34897|GLYM_HUMAN	AHLLADMAHISGLVAAK	17	573.32	3	Anatase_10x_LA_1_f10498	Anatase	10x	LA	1	0	2.34	3.886	0.563	0.563
sp|O43166|SI1L1_HUMAN	AHLQAEVQHLREDNLR	16	483.007	4	Anatase_10x_LA_1_f10498	Anatase	10x	LA	1	0	0.9	2.981	0.415	0.415
sp|P98175|RBM10_HUMAN	AHLSENELEALEK	13	494.92	3	Anatase_10x_LA_1_f10498	Anatase	10x	LA	1	0	2.08	3.189	0.36	0.36
sp|P50995|ANX11_HUMAN	AHLVAVFNEYQR	12	482.922	3	Anatase_10x_LA_1_f10498	Anatase	10x	LA	1	0	1.6	3.5	0.375	0.375
##sp|P07199|CENPB_HUMAN	AHNKRTVHVLDHELHLIHS#QVR	22	680.607	4	Anatase_10x_LA_1_f10498	Anatase	10x	LA	1	1	0.05	1.99	0.29	0.29
sp|Q969T7|5NT3B_HUMAN	AHNLLCQQK	9	556.289	2	Anatase_10x_LA_1_f10498	Anatase	10x	LA	1	0	2.78	1.89	0.281	0.281
##sp|Q9H5H4|ZN768_HUMAN	AHPILAS#RQSFS#K	13	801.367	2	Anatase_10x_LA_1_f10498	Anatase	10x	LA	1	1	1.77	1.491	0.006	0.235
sp|Q9H7E9|CH033_HUMAN	AHPLGDEGGTASKK	14	456.569	3	Anatase_10x_LA_1_f10498	Anatase	10x	LA	1	0	1.73	2.537	0.49	0.49
sp|P62308|RUXG_HUMAN	AHPPELKK	8	460.273	2	Anatase_10x_LA_1_f10498	Anatase	10x	LA	1	0	2.15	1.427	0.372	0.372
sp|Q96CS3|FAF2_HUMAN	AHPVFYQGTYSQALNDAKR	19	722.698	3	Anatase_10x_LA_1_f10498	Anatase	10x	LA	1	0	2.47	1.718	0.431	0.431
sp|Q9UHR6|ZNHI2_HUMAN	AHQAHAVVAEEVAALTGELER	21	551.04	4	Anatase_10x_LA_1_f10498	Anatase	10x	LA	1	0	3.63	3.422	0.389	0.389
sp|Q9UHR6|ZNHI2_HUMAN	AHQAHAVVAEEVAALTGELER	21	734.384	3	Anatase_10x_LA_1_f10498	Anatase	10x	LA	1	0	3.15	3.177	0.415	0.415
sp|Q9UHR6|ZNHI2_HUMAN	AHQAHAVVAEEVAALTGELER	21	734.384	3	Anatase_10x_LA_1_f10498	Anatase	10x	LA	1	0	3.22	3.775	0.518	0.518
sp|Q9UH92|MLX_HUMAN	AHQDNPHEGEDQVSDQVK	18	678.305	3	Anatase_10x_LA_1_f10498	Anatase	10x	LA	1	0	2.1	3.084	0.412	0.412
sp|Q9UH92|MLX_HUMAN	AHQDNPHEGEDQVSDQVK	18	1016.95	2	Anatase_10x_LA_1_f10498	Anatase	10x	LA	1	0	2.12	2.027	0.289	0.289
sp|O00161|SNP23_HUMAN	AHQITDESLESTRR	14	821.913	2	Anatase_10x_LA_1_f10498	Anatase	10x	LA	1	0	2.54	2.365	0.433	0.433
sp|Q86VP1|TAXB1_HUMAN	AHQLEEDIVSVTHK	14	535.947	3	Anatase_10x_LA_1_f10498	Anatase	10x	LA	1	0	1.29	2.792	0.465	0.465
sp|O00743|PPP6_HUMAN	AHQLVHEGYK	10	591.308	2	Anatase_10x_LA_1_f10498	Anatase	10x	LA	1	0	2.22	3.108	0.682	0.682
sp|O00743|PPP6_HUMAN	AHQLVHEGYK	10	394.541	3	Anatase_10x_LA_1_f10498	Anatase	10x	LA	1	0	1.54	2.662	0.573	0.573
sp|P67775|PP2AA_HUMAN	AHQLVMEGYNWCHDR	15	639.284	3	Anatase_10x_LA_1_f10498	Anatase	10x	LA	1	0	2.33	4.852	0.667	0.667
sp|P67775|PP2AA_HUMAN	AHQLVMEGYNWCHDR	15	958.423	2	Anatase_10x_LA_1_f10498	Anatase	10x	LA	1	0	3.19	3.601	0.544	0.544
sp|P67775|PP2AA_HUMAN	AHQLVMEGYNWCHDR	15	479.715	4	Anatase_10x_LA_1_f10498	Anatase	10x	LA	1	0	2.05	2.488	0.314	0.314
sp|Q9BRV8|SIKE1_HUMAN	AHQSHSAEIESQIDR	15	569.941	3	Anatase_10x_LA_1_f10498	Anatase	10x	LA	1	0	2.25	4.073	0.261	0.261
sp|Q9BRV8|SIKE1_HUMAN	AHQSHSAEIESQIDR	15	854.408	2	Anatase_10x_LA_1_f10498	Anatase	10x	LA	1	0	2.01	4.323	0.58	0.58
sp|P36873|PP1G_HUMAN	AHQVVEDGYEFFAK	14	547.265	3	Anatase_10x_LA_1_f10498	Anatase	10x	LA	1	0	2.5	3.998	0.54	0.54
sp|P46937|YAP1_HUMAN	AHS#SPASLQLGAVSPGTLTPTGVVSGPAATPTAQHLR	37	1205.62	3	Anatase_10x_LA_1_f10498	Anatase	10x	LA	1	1	0.81	4.18	0.055	0.498
sp|Q66K64|DCA15_HUMAN	AHSEPLALCGETAPRDS#PPASEAPASEPGYVNYTK	35	1250.57	3	Anatase_10x_LA_1_f10498	Anatase	10x	LA	1	1	1.25	4.171	0.054	0.428
sp|Q02543|RL18A_HUMAN	AHSIQIM*K	8	472.256	2	Anatase_10x_LA_1_f10498	Anatase	10x	LA	1	0	1.53	1.999	0.209	0.209
sp|Q02543|RL18A_HUMAN	AHSIQIMK	8	464.259	2	Anatase_10x_LA_1_f10498	Anatase	10x	LA	1	0	2.22	2.089	0.461	0.461
sp|Q13586|STIM1_HUMAN	AHSLMELSPSAPPGGS#PHLDSSR	23	804.035	3	Anatase_10x_LA_1_f10498	Anatase	10x	LA	1	1	1.58	2.633	0.25	0.25
sp|Q13586|STIM1_HUMAN	AHSLMELSPSAPPGGS#PHLDSSR	23	804.035	3	Anatase_10x_LA_1_f10498	Anatase	10x	LA	1	1	1.51	3.228	0.221	0.422
sp|P00558|PGK1_HUMAN	AHSSM*VGVNLPQK	13	692.358	2	Anatase_10x_LA_1_f10498	Anatase	10x	LA	1	0	2.51	2.698	0.461	0.461
sp|P00558|PGK1_HUMAN	AHSSM*VGVNLPQK	13	461.908	3	Anatase_10x_LA_1_f10498	Anatase	10x	LA	1	0	2.36	4.818	0.319	0.319
sp|P00558|PGK1_HUMAN	AHSSMVGVNLPQK	13	456.575	3	Anatase_10x_LA_1_f10498	Anatase	10x	LA	1	0	1.4	4.185	0.345	0.345
sp|P00558|PGK1_HUMAN	AHSSMVGVNLPQK	13	684.36	2	Anatase_10x_LA_1_f10498	Anatase	10x	LA	1	0	1.55	3.028	0.599	0.599
sp|O60343|TBCD4_HUMAN	AHT#FSHPPSSTK	12	459.539	3	Anatase_10x_LA_1_f10498	Anatase	10x	LA	1	1	2.08	1.798	0.22	0.292
sp|O60343|TBCD4_HUMAN	AHT#FSHPPSSTK	12	688.805	2	Anatase_10x_LA_1_f10498	Anatase	10x	LA	1	1	2.49	2.5	0.218	0.576
sp|P61201|CSN2_HUMAN	AHTDFFEAFK	10	404.862	3	Anatase_10x_LA_1_f10498	Anatase	10x	LA	1	0	2.85	2.69	0.3	0.3
sp|Q9Y6Y8|S23IP_HUMAN	AHTSSTQLQEELEK	14	800.897	2	Anatase_10x_LA_1_f10498	Anatase	10x	LA	1	0	2.94	3.467	0.477	0.477
sp|Q13029|PRDM2_HUMAN	AHVEHMQSLPEDPLETSKEEEELNDS#SEELYTTIK	35	1035.22	4	Anatase_10x_LA_1_f10498	Anatase	10x	LA	1	1	3.35	3.698	0.012	0.285
sp|Q13029|PRDM2_HUMAN	AHVEHMQSLPEDPLETSKEEEELNDSSEELYTTIK	35	1015.22	4	Anatase_10x_LA_1_f10498	Anatase	10x	LA	1	0	1.19	4.083	0.361	0.361
sp|P55072|TERA_HUMAN	AHVIVM*AATNRPNSIDPALRR	21	773.423	3	Anatase_10x_LA_1_f10498	Anatase	10x	LA	1	0	1.85	3.769	0.491	0.491
sp|P55072|TERA_HUMAN	AHVIVM*AATNRPNSIDPALRR	21	580.319	4	Anatase_10x_LA_1_f10498	Anatase	10x	LA	1	0	1.95	3.935	0.526	0.526
sp|P55072|TERA_HUMAN	AHVIVM*AATNRPNSIDPALRR	21	464.457	5	Anatase_10x_LA_1_f10498	Anatase	10x	LA	1	0	2.42	2.551	0.4	0.4
sp|P55072|TERA_HUMAN	AHVIVMAATNRPNSIDPALRR	21	576.321	4	Anatase_10x_LA_1_f10498	Anatase	10x	LA	1	0	1.89	2.588	0.496	0.496
sp|P55072|TERA_HUMAN	AHVIVMAATNRPNSIDPALRR	21	768.092	3	Anatase_10x_LA_1_f10498	Anatase	10x	LA	1	0	2.32	3.624	0.437	0.437
sp|Q86UP2|KTN1_HUMAN	AHVQEVAQHNLK	12	458.582	3	Anatase_10x_LA_1_f10498	Anatase	10x	LA	1	0	2.2	3.466	0.422	0.422
sp|Q86UP2|KTN1_HUMAN	AHVQEVAQHNLK	12	687.37	2	Anatase_10x_LA_1_f10498	Anatase	10x	LA	1	0	2.78	3.49	0.649	0.649
sp|Q53GS9|SNUT2_HUMAN	AHVSPHEM*LQAVVLCSK	17	641.326	3	Anatase_10x_LA_1_f10498	Anatase	10x	LA	1	0	0.27	4.067	0.452	0.452
sp|Q53GS9|SNUT2_HUMAN	AHVSPHEMLQAVVLCSK	17	635.995	3	Anatase_10x_LA_1_f10498	Anatase	10x	LA	1	0	1.81	4.285	0.448	0.448
sp|O95478|NSA2_HUMAN	AHVTHPELK	9	516.287	2	Anatase_10x_LA_1_f10498	Anatase	10x	LA	1	0	2.54	2.291	0.504	0.504
sp|P21333|FLNA_HUMAN	AHVVPCFDASK	11	410.87	3	Anatase_10x_LA_1_f10498	Anatase	10x	LA	1	0	1.24	1.752	0.382	0.382
sp|P27708|PYR1_HUMAN	AHWTPFEGQK	10	600.795	2	Anatase_10x_LA_1_f10498	Anatase	10x	LA	1	0	1.9	1.855	0.362	0.362
sp|P02765|FETUA_HUMAN	AHYDLR	6	387.699	2	Anatase_10x_LA_1_f10498	Anatase	10x	LA	1	0	1.2	1.698	0.144	0.144
sp|P06576|ATPB_HUMAN	AIAELGIYPAVDPLDSTSR	19	994.523	2	Anatase_10x_LA_1_f10498	Anatase	10x	LA	1	0	2.22	3.138	0.468	0.468
sp|Q96PK6|RBM14_HUMAN	AIEALHGHELRPGR	14	519.288	3	Anatase_10x_LA_1_f10498	Anatase	10x	LA	1	0	1.99	2.696	0.488	0.488
sp|Q96PK6|RBM14_HUMAN	AIEALHGHELRPGR	14	778.428	2	Anatase_10x_LA_1_f10498	Anatase	10x	LA	1	0	2.58	2.859	0.334	0.334
sp|Q16222|UAP1_HUMAN	AIEGFNQS#SHQKNVDARMEPVPREVLGSAT#R	31	717.538	5	Anatase_10x_LA_1_f10498	Anatase	10x	LA	1	1	3.26	2.841	0.005	0.312
sp|Q12846|STX4_HUMAN	AIEPQKEEADENYNS#VNTR	19	1144	2	Anatase_10x_LA_1_f10498	Anatase	10x	LA	1	1	2.18	2.744	0.082	0.353
sp|P36871|PGM1_HUMAN	AIGGIILT#ASHNPGGPNGDFGIK	23	1143.57	2	Anatase_10x_LA_1_f10498	Anatase	10x	LA	1	1	1.93	2.933	0.068	0.319
sp|P36871|PGM1_HUMAN	AIGGIILTAS#HNPGGPNGDFGIK	23	762.716	3	Anatase_10x_LA_1_f10498	Anatase	10x	LA	1	1	2.91	4.076	0.035	0.546
sp|P28066|PSA5_HUMAN	AIGSASEGAQSSLQEVYHK	19	654.659	3	Anatase_10x_LA_1_f10498	Anatase	10x	LA	1	0	2.66	2.171	0.248	0.248
sp|P18887|XRCC1_HUMAN	AIGSTSKPQES#PK	13	705.339	2	Anatase_10x_LA_1_f10498	Anatase	10x	LA	1	1	2.71	2.382	0.427	0.427
sp|P18887|XRCC1_HUMAN	AIGSTSKPQES#PK	13	470.561	3	Anatase_10x_LA_1_f10498	Anatase	10x	LA	1	1	1.83	1.74	0.144	0.18
sp|Q9BXI6|TB10A_HUMAN	AILDAEPGPRPALQPS#PSIRLPLDAPLPGSK	31	1085.25	3	Anatase_10x_LA_1_f10498	Anatase	10x	LA	1	1	0.55	3.284	0.015	0.481
sp|Q13509|TBB3_HUMAN	AILVDLEPGTM*DSVR	15	816.422	2	Anatase_10x_LA_1_f10498	Anatase	10x	LA	1	0	3.09	3.57	0.452	0.452
sp|Q13509|TBB3_HUMAN	AILVDLEPGTMDSVR	15	808.424	2	Anatase_10x_LA_1_f10498	Anatase	10x	LA	1	0	3.26	2.694	0.599	0.599
sp|P00387|NB5R3_HUMAN	AIMKDPDDHTVCHLLFANQTEK	22	861.751	3	Anatase_10x_LA_1_f10498	Anatase	10x	LA	1	0	2	5.04	0.583	0.583
sp|P00387|NB5R3_HUMAN	AIMKDPDDHTVCHLLFANQTEK	22	646.565	4	Anatase_10x_LA_1_f10498	Anatase	10x	LA	1	0	1.9	2.577	0.301	0.301
sp|P08133|ANXA6_HUMAN	AINEAYKEDYHK	12	740.859	2	Anatase_10x_LA_1_f10498	Anatase	10x	LA	1	0	2.06	3.609	0.498	0.498
sp|P08133|ANXA6_HUMAN	AINEAYKEDYHK	12	494.241	3	Anatase_10x_LA_1_f10498	Anatase	10x	LA	1	0	2.07	1.903	0.381	0.381
sp|Q14676|MDC1_HUMAN	AIPGDQHPES#PVHTEPM*GIQGR	22	817.039	3	Anatase_10x_LA_1_f10498	Anatase	10x	LA	1	1	2.69	1.759	0.311	0.311
sp|Q14676|MDC1_HUMAN	AIPGDQHPES#PVHTEPMGIQGR	22	811.707	3	Anatase_10x_LA_1_f10498	Anatase	10x	LA	1	1	1.9	2.304	0.374	0.374
sp|P07814|SYEP_HUMAN	AIQGGTSHHLGQNFSK	16	561.286	3	Anatase_10x_LA_1_f10498	Anatase	10x	LA	1	0	2.2	2.249	0.498	0.498
sp|P07814|SYEP_HUMAN	AIQGGTSHHLGQNFSK	16	421.216	4	Anatase_10x_LA_1_f10498	Anatase	10x	LA	1	0	1.63	2.081	0.35	0.35
sp|O43242|PSMD3_HUMAN	AIRDGVIEASINHEK	15	413.725	4	Anatase_10x_LA_1_f10498	Anatase	10x	LA	1	0	1.97	2.627	0.191	0.191
sp|P19338|NUCL_HUMAN	AIRLELQGPRGS#PNAR	16	605.653	3	Anatase_10x_LA_1_f10498	Anatase	10x	LA	1	1	2.65	2.276	0.427	0.427
sp|Q32P44|EMAL3_HUMAN	AIS#SANLLVR	10	562.299	2	Anatase_10x_LA_1_f10498	Anatase	10x	LA	1	1	2.9	1.812	0.048	0.197
sp|P30153|2AAA_HUMAN	AISHEHSPSDLEAHFVPLVK	20	554.039	4	Anatase_10x_LA_1_f10498	Anatase	10x	LA	1	0	0.52	2.72	0.198	0.198
sp|P30153|2AAA_HUMAN	AISHEHSPSDLEAHFVPLVK	20	443.434	5	Anatase_10x_LA_1_f10498	Anatase	10x	LA	1	0	1.61	3.175	0.417	0.417
sp|P14866|HNRPL_HUMAN	AITHLNNNFMFGQK	14	545.609	3	Anatase_10x_LA_1_f10498	Anatase	10x	LA	1	0	1.9	3.567	0.378	0.378
sp|Q6KC79|NIPBL_HUMAN	AITSLLGGGS#PK	12	590.804	2	Anatase_10x_LA_1_f10498	Anatase	10x	LA	1	1	2.81	2.596	0.472	0.472
sp|O14818|PSA7_HUMAN	AITVFSPDGHLFQVEYAQEAVKK	23	859.787	3	Anatase_10x_LA_1_f10498	Anatase	10x	LA	1	0	4.96	3.095	0.442	0.442
sp|P08865|RSSA_HUMAN	AIVAIENPADVSVISSR	17	870.979	2	Anatase_10x_LA_1_f10498	Anatase	10x	LA	1	0	0.61	4.49	0.508	0.508
sp|Q13442|HAP28_HUMAN	AKDDATLSGK	10	503.265	2	Anatase_10x_LA_1_f10498	Anatase	10x	LA	1	0	1.88	2.006	0.38	0.38
sp|O60271|JIP4_HUMAN	AKDDDDSDIPTAQRK	15	558.937	3	Anatase_10x_LA_1_f10498	Anatase	10x	LA	1	0	2.25	2.854	0.348	0.348
sp|O60271|JIP4_HUMAN	AKDDDDSDIPTAQRK	15	837.902	2	Anatase_10x_LA_1_f10498	Anatase	10x	LA	1	0	2.63	1.52	0.228	0.228
sp|Q92896|GSLG1_HUMAN	AKDDSELEGQVISCLK	16	597.966	3	Anatase_10x_LA_1_f10498	Anatase	10x	LA	1	0	2.38	4.143	0.468	0.468
sp|P26641|EF1G_HUMAN	AKDPFAHLPK	10	375.214	3	Anatase_10x_LA_1_f10498	Anatase	10x	LA	1	0	1.47	3.561	0.491	0.491
sp|P26641|EF1G_HUMAN	AKDPFAHLPK	10	562.318	2	Anatase_10x_LA_1_f10498	Anatase	10x	LA	1	0	1.87	2.171	0.472	0.472
sp|Q2NL82|TSR1_HUMAN	AKEELIFHCGFR	12	502.923	3	Anatase_10x_LA_1_f10498	Anatase	10x	LA	1	0	1.69	3.455	0.456	0.456
sp|Q14643|ITPR1_HUMAN	AKEPTTQITEEVRDQLLEASAATRK	25	697.126	4	Anatase_10x_LA_1_f10498	Anatase	10x	LA	1	0	4.69	3.072	0.395	0.395
sp|Q14643|ITPR1_HUMAN	AKEPTTQITEEVRDQLLEASAATRK	25	697.125	4	Anatase_10x_LA_1_f10498	Anatase	10x	LA	1	0	3.13	2.837	0.434	0.434
sp|Q9H446|RWDD1_HUMAN	AKFDAELLEIKK	12	468.942	3	Anatase_10x_LA_1_f10498	Anatase	10x	LA	1	0	1.3	4.766	0.397	0.397
sp|Q9H446|RWDD1_HUMAN	AKFDAELLEIKK	12	702.91	2	Anatase_10x_LA_1_f10498	Anatase	10x	LA	1	0	2.75	2.598	0.337	0.337
sp|Q58FF8|H90B2_HUMAN	AKFENLCK	8	505.262	2	Anatase_10x_LA_1_f10498	Anatase	10x	LA	1	0	2.43	2.348	0.404	0.404
sp|O94973|AP2A2_HUMAN	AKHPMDTEVTK	11	628.821	2	Anatase_10x_LA_1_f10498	Anatase	10x	LA	1	0	2.67	2.085	0.385	0.385
sp|P27797|CALR_HUMAN	AKIDDPTDSKPEDWDKPEHIPDPDAK	26	740.606	4	Anatase_10x_LA_1_f10498	Anatase	10x	LA	1	0	2.39	3.796	0.414	0.414
sp|P27797|CALR_HUMAN	AKIDDPTDSKPEDWDKPEHIPDPDAK	26	592.686	5	Anatase_10x_LA_1_f10498	Anatase	10x	LA	1	0	1.86	3.337	0.427	0.427
sp|P27797|CALR_HUMAN	AKIDDPTDSKPEDWDKPEHIPDPDAK	26	987.139	3	Anatase_10x_LA_1_f10498	Anatase	10x	LA	1	0	2.07	5.097	0.488	0.488
sp|P24666|PPAC_HUMAN	AKIELLGSYDPQK	13	731.403	2	Anatase_10x_LA_1_f10498	Anatase	10x	LA	1	0	2.13	2.346	0.395	0.395
sp|P24666|PPAC_HUMAN	AKIELLGSYDPQK	13	487.938	3	Anatase_10x_LA_1_f10498	Anatase	10x	LA	1	0	2.25	2.35	0.375	0.375
sp|P27824|CALX_HUMAN	AKKDDTDDEIAK	12	674.835	2	Anatase_10x_LA_1_f10498	Anatase	10x	LA	1	0	2.69	4.13	0.566	0.566
sp|P27824|CALX_HUMAN	AKKDDTDDEIAK	12	450.225	3	Anatase_10x_LA_1_f10498	Anatase	10x	LA	1	0	2.05	4.222	0.445	0.445
sp|Q9H1P3|OSBL2_HUMAN	AKLDEDSGKADSDVADDVPVAQETVQVIPGSK	32	821.663	4	Anatase_10x_LA_1_f10498	Anatase	10x	LA	1	0	3.5	3.52	0.339	0.339
sp|Q9H1P3|OSBL2_HUMAN	AKLDEDSGKADSDVADDVPVAQETVQVIPGSK	32	1095.21	3	Anatase_10x_LA_1_f10498	Anatase	10x	LA	1	0	2.41	4.634	0.488	0.488
sp|Q6PCB5|RSBNL_HUMAN	AKLDHVQFAEFK	12	478.259	3	Anatase_10x_LA_1_f10498	Anatase	10x	LA	1	0	1.86	4.339	0.657	0.657
sp|P80303|NUCB2_HUMAN	AKLDSLQDIGM*DHQALLK	18	671.356	3	Anatase_10x_LA_1_f10498	Anatase	10x	LA	1	0	2.68	3.599	0.558	0.558
sp|P80303|NUCB2_HUMAN	AKLDSLQDIGM*DHQALLK	18	1006.53	2	Anatase_10x_LA_1_f10498	Anatase	10x	LA	1	0	3.33	1.95	0.412	0.412
sp|P80303|NUCB2_HUMAN	AKLDSLQDIGMDHQALLK	18	666.024	3	Anatase_10x_LA_1_f10498	Anatase	10x	LA	1	0	2.71	4.751	0.578	0.578
sp|O00410|IPO5_HUMAN	AKLEEHFK	8	501.275	2	Anatase_10x_LA_1_f10498	Anatase	10x	LA	1	0	2.18	2.695	0.374	0.374
sp|O60313|OPA1_HUMAN	AKNEILDEVISLSQVTPK	18	662.04	3	Anatase_10x_LA_1_f10498	Anatase	10x	LA	1	0	4.67	3.118	0.269	0.269
sp|O60313|OPA1_HUMAN	AKNEILDEVISLSQVTPK	18	662.039	3	Anatase_10x_LA_1_f10498	Anatase	10x	LA	1	0	3.95	3.506	0.422	0.422
sp|Q86SF2|GALT7_HUMAN	AKNEQEHHAGGDSQK	15	409.693	4	Anatase_10x_LA_1_f10498	Anatase	10x	LA	1	0	2.46	3.438	0.367	0.367
sp|Q86SF2|GALT7_HUMAN	AKNEQEHHAGGDSQK	15	545.92	3	Anatase_10x_LA_1_f10498	Anatase	10x	LA	1	0	-0.28	2.038	0.29	0.29
sp|P53396|ACLY_HUMAN	AKPAMPQDSVPS#PR	14	780.867	2	Anatase_10x_LA_1_f10498	Anatase	10x	LA	1	1	2.2	2.889	0.222	0.674
sp|Q9BUZ4|TRAF4_HUMAN	AKPNLECFSPAFYTHK	16	637.316	3	Anatase_10x_LA_1_f10498	Anatase	10x	LA	1	0	2.89	2.808	0.385	0.385
sp|Q9GZT9|EGLN1_HUMAN	AKPPADPAAAAS#PCR	15	780.357	2	Anatase_10x_LA_1_f10498	Anatase	10x	LA	1	1	2.59	1.99	0.431	0.431
sp|O43242|PSMD3_HUMAN	AKPPPGGGEQEPPPPPAPQDVEMKEEAATGGGSTGEADGK	40	967.706	4	Anatase_10x_LA_1_f10498	Anatase	10x	LA	1	0	1.11	3.13	0.323	0.323
sp|P40818|UBP8_HUMAN	AKPQIPAERDREPSK	15	431.239	4	Anatase_10x_LA_1_f10498	Anatase	10x	LA	1	0	2.02	2	0.353	0.353
sp|O60488|ACSL4_HUMAN	AKPTSDKPGSPYR	13	468.582	3	Anatase_10x_LA_1_f10498	Anatase	10x	LA	1	0	2.04	1.543	0.28	0.28
sp|O60488|ACSL4_HUMAN	AKPTSDKPGSPYR	13	702.369	2	Anatase_10x_LA_1_f10498	Anatase	10x	LA	1	0	2.24	1.981	0.364	0.364
sp|O95573|ACSL3_HUMAN	AKPVNSKPDSAYR	13	716.883	2	Anatase_10x_LA_1_f10498	Anatase	10x	LA	1	0	2.79	2.179	0.313	0.313
sp|P49321|NASP_HUMAN	AKQEPEVNGGSGDAVPSGNEVSENMEEEAENQAESR	36	1258.88	3	Anatase_10x_LA_1_f10498	Anatase	10x	LA	1	0	0.88	3.821	0.384	0.384
sp|P49321|NASP_HUMAN	AKQEPEVNGGSGDAVPSGNEVSENMEEEAENQAESR	36	1258.88	3	Anatase_10x_LA_1_f10498	Anatase	10x	LA	1	0	1.96	2.901	0.244	0.244
sp|Q14152|EIF3A_HUMAN	AKREEELREYQER	13	434.724	4	Anatase_10x_LA_1_f10498	Anatase	10x	LA	1	0	1.62	3.096	0.324	0.324
sp|Q14152|EIF3A_HUMAN	AKREEELREYQER	13	579.297	3	Anatase_10x_LA_1_f10498	Anatase	10x	LA	1	0	1.93	2.654	0.324	0.324
sp|Q00839|HNRPU_HUMAN	AKS#PQPPVEEEDEHFDDTVVCLDTYNCDLHFK	32	979.426	4	Anatase_10x_LA_1_f10498	Anatase	10x	LA	1	1	6.53	4.705	0.355	0.537
sp|Q00839|HNRPU_HUMAN	AKS#PQPPVEEEDEHFDDTVVCLDTYNCDLHFK	32	1305.56	3	Anatase_10x_LA_1_f10498	Anatase	10x	LA	1	1	4.91	4.854	0.168	0.525
sp|Q00839|HNRPU_HUMAN	AKS#PQPPVEEEDEHFDDTVVCLDTYNCDLHFK	32	979.426	4	Anatase_10x_LA_1_f10498	Anatase	10x	LA	1	1	6.59	6.239	0.289	0.45
sp|Q00839|HNRPU_HUMAN	AKS#PQPPVEEEDEHFDDTVVCLDTYNCDLHFK	32	783.742	5	Anatase_10x_LA_1_f10498	Anatase	10x	LA	1	1	6.22	3.776	0.402	0.402
sp|Q00839|HNRPU_HUMAN	AKS#PQPPVEEEDEHFDDTVVCLDTYNCDLHFK	32	783.739	5	Anatase_10x_LA_1_f10498	Anatase	10x	LA	1	1	3.04	3.699	0.349	0.349
sp|Q00839|HNRPU_HUMAN	AKS#PQPPVEEEDEHFDDTVVCLDTYNCDLHFK	32	1305.56	3	Anatase_10x_LA_1_f10498	Anatase	10x	LA	1	1	3	3.676	0.075	0.393
sp|Q00839|HNRPU_HUMAN	AKS#PQPPVEEEDEHFDDTVVCLDTYNCDLHFK	32	979.423	4	Anatase_10x_LA_1_f10498	Anatase	10x	LA	1	1	3.14	5.646	0.179	0.397
sp|Q00839|HNRPU_HUMAN	AKS#PQPPVEEEDEHFDDTVVCLDTYNCDLHFK	32	979.422	4	Anatase_10x_LA_1_f10498	Anatase	10x	LA	1	1	3	3.739	0.301	0.301
sp|Q00839|HNRPU_HUMAN	AKS#PQPPVEEEDEHFDDTVVCLDTYNCDLHFK	32	979.421	4	Anatase_10x_LA_1_f10498	Anatase	10x	LA	1	1	1.88	3.29	0.187	0.187
sp|Q00839|HNRPU_HUMAN	AKS#PQPPVEEEDEHFDDTVVCLDTYNCDLHFK	32	979.421	4	Anatase_10x_LA_1_f10498	Anatase	10x	LA	1	1	1.54	3.74	0.177	0.177
sp|Q00839|HNRPU_HUMAN	AKS#PQPPVEEEDEHFDDTVVCLDTYNCDLHFK	32	979.422	4	Anatase_10x_LA_1_f10498	Anatase	10x	LA	1	1	2.29	4.278	0.359	0.428
sp|Q9HAU0|PKHA5_HUMAN	AKS#PTPESSTIASYVTLR	18	994.492	2	Anatase_10x_LA_1_f10498	Anatase	10x	LA	1	1	1.65	1.927	0.207	0.207
sp|Q9UBW5|BIN2_HUMAN	AKS#QEEVLPSSTTPSPGGALSPSGQPSSSATEVVLR	36	1206.93	3	Anatase_10x_LA_1_f10498	Anatase	10x	LA	1	1	2.48	4.345	0.077	0.408
sp|Q9UBW5|BIN2_HUMAN	AKS#QEEVLPSSTTPSPGGALSPSGQPSSSATEVVLR	36	1206.93	3	Anatase_10x_LA_1_f10498	Anatase	10x	LA	1	1	3.33	5.179	0.114	0.621
sp|P24588|AKAP5_HUMAN	AKS#TQDLSEGISR	13	736.345	2	Anatase_10x_LA_1_f10498	Anatase	10x	LA	1	1	2.69	1.446	0.107	0.341
sp|P49760|CLK2_HUMAN	AKS#VEDDAEGHLIYHVGDWLQER	23	916.425	3	Anatase_10x_LA_1_f10498	Anatase	10x	LA	1	1	5.38	4.098	0.434	0.434
sp|P49760|CLK2_HUMAN	AKS#VEDDAEGHLIYHVGDWLQER	23	687.569	4	Anatase_10x_LA_1_f10498	Anatase	10x	LA	1	1	2.41	3.286	0.343	0.343
sp|Q5VZL5|ZMYM4_HUMAN	AKSEDS#DVELS#D	12	727.754	2	Anatase_10x_LA_1_f10498	Anatase	10x	LA	1	1	2.49	1.86	0.126	0.303
sp|Q00839|HNRPU_HUMAN	AKSPQPPVEEEDEHFDDTVVCLDTYNCDLHFK	32	959.43	4	Anatase_10x_LA_1_f10498	Anatase	10x	LA	1	0	1.99	3.77	0.411	0.411
sp|P42167|LAP2B_HUMAN	AKT#PVTLK	8	469.26	2	Anatase_10x_LA_1_f10498	Anatase	10x	LA	1	1	1.92	1.903	0.246	0.246
sp|P27635|RL10_HUMAN	AKVDEFPLCGHM*VSDEYEQLSSEALEAAR	29	825.134	4	Anatase_10x_LA_1_f10498	Anatase	10x	LA	1	0	2.82	3.386	0.289	0.289
sp|P27635|RL10_HUMAN	AKVDEFPLCGHM*VSDEYEQLSSEALEAAR	29	1099.84	3	Anatase_10x_LA_1_f10498	Anatase	10x	LA	1	0	2.3	3.264	0.289	0.289
sp|P27635|RL10_HUMAN	AKVDEFPLCGHM*VSDEYEQLSSEALEAAR	29	1099.84	3	Anatase_10x_LA_1_f10498	Anatase	10x	LA	1	0	2.28	4.557	0.451	0.451
sp|P27635|RL10_HUMAN	AKVDEFPLCGHM*VSDEYEQLSSEALEAAR	29	1099.84	3	Anatase_10x_LA_1_f10498	Anatase	10x	LA	1	0	1.91	6.328	0.636	0.636
sp|P27635|RL10_HUMAN	AKVDEFPLCGHM*VSDEYEQLSSEALEAAR	29	1099.85	3	Anatase_10x_LA_1_f10498	Anatase	10x	LA	1	0	8.45	4.926	0.614	0.614
sp|P27635|RL10_HUMAN	AKVDEFPLCGHMVSDEYEQLSSEALEAAR	29	1094.52	3	Anatase_10x_LA_1_f10498	Anatase	10x	LA	1	0	6.64	7.171	0.586	0.586
sp|P27635|RL10_HUMAN	AKVDEFPLCGHMVSDEYEQLSSEALEAAR	29	1094.51	3	Anatase_10x_LA_1_f10498	Anatase	10x	LA	1	0	0.76	4.476	0.536	0.536
sp|P07108|ACBP_HUMAN	AKWDAWNELK	10	420.885	3	Anatase_10x_LA_1_f10498	Anatase	10x	LA	1	0	1.41	3.157	0.1	0.1
sp|Q02539|H11_HUMAN	ALAAAGYDVEK	11	554.289	2	Anatase_10x_LA_1_f10498	Anatase	10x	LA	1	0	1.91	3.035	0.445	0.445
sp|Q4KMP7|TB10B_HUMAN	ALAAGADS#PKTEEARPSPAPGPGT#PTGTPTR	31	1040.15	3	Anatase_10x_LA_1_f10498	Anatase	10x	LA	1	1	2.49	3.847	0.027	0.608
sp|Q4KMP7|TB10B_HUMAN	ALAAGADS#PKTEEARPSPAPGPGT#PTGTPTR	31	1040.15	3	Anatase_10x_LA_1_f10498	Anatase	10x	LA	1	1	3.11	3.244	0.002	0.462
sp|Q4KMP7|TB10B_HUMAN	ALAAGADS#PKTEEARPSPAPGPGTPTGTPTR	31	1013.49	3	Anatase_10x_LA_1_f10498	Anatase	10x	LA	1	1	3.21	2.748	0.14	0.267
sp|Q4KMP7|TB10B_HUMAN	ALAAGADSPKTEEARPS#PAPGPGT#PTGT#PTR	31	1066.8	3	Anatase_10x_LA_1_f10498	Anatase	10x	LA	1	1	1.93	3.036	0.056	0.215
sp|P16401|H15_HUMAN	ALAAGGYDVEK	11	547.281	2	Anatase_10x_LA_1_f10498	Anatase	10x	LA	1	0	2.36	2.282	0.452	0.452
sp|P22830|HEMH_HUMAN	ALADLVHSHIQSNELCSK	18	674.676	3	Anatase_10x_LA_1_f10498	Anatase	10x	LA	1	0	2.46	4.071	0.586	0.586
sp|P22830|HEMH_HUMAN	ALADLVHSHIQSNELCSK	18	506.258	4	Anatase_10x_LA_1_f10498	Anatase	10x	LA	1	0	1.97	1.69	0.225	0.225
sp|P22830|HEMH_HUMAN	ALADLVHSHIQSNELCSK	18	1011.51	2	Anatase_10x_LA_1_f10498	Anatase	10x	LA	1	0	2.78	3.653	0.515	0.515
sp|P22830|HEMH_HUMAN	ALADLVHSHIQSNELCSK	18	1011.51	2	Anatase_10x_LA_1_f10498	Anatase	10x	LA	1	0	2.78	2.796	0.441	0.441
sp|P05386|RLA1_HUMAN	ALANVNIGSLICNVGAGGPAPAAGAAPAGGPAPSTAAAPAEEK	43	1270.32	3	Anatase_10x_LA_1_f10498	Anatase	10x	LA	1	0	2.58	2.577	0.318	0.318
sp|Q13813|SPTN1_HUMAN	ALCAEADRLQQSHPLSATQIQVK	23	641.838	4	Anatase_10x_LA_1_f10498	Anatase	10x	LA	1	0	2.6	2.077	0.217	0.217
sp|Q8IY81|SPB1_HUMAN	ALDIS#LS#SGEEDEGDEEDSTAGTTK	25	1358.52	2	Anatase_10x_LA_1_f10498	Anatase	10x	LA	1	1	2.95	2.302	0.006	0.461
sp|Q9C0K0|BC11B_HUMAN	ALDKDS#PPPSSR	12	675.31	2	Anatase_10x_LA_1_f10498	Anatase	10x	LA	1	1	2.69	2.708	0.035	0.299
sp|O15355|PPM1G_HUMAN	ALDMSYDHKPEDEVELAR	18	706.667	3	Anatase_10x_LA_1_f10498	Anatase	10x	LA	1	0	2.83	2.624	0.442	0.442
sp|Q32MZ4|LRRF1_HUMAN	ALDSNS#LENDDLSAPGREPGHFNPESR	27	1002.11	3	Anatase_10x_LA_1_f10498	Anatase	10x	LA	1	1	1.35	2.602	0.004	0.34
sp|P11940|PABP1_HUMAN	ALDTMNFDVIK	11	633.826	2	Anatase_10x_LA_1_f10498	Anatase	10x	LA	1	0	3.61	2.454	0.505	0.505
sp|P11940|PABP1_HUMAN	ALDTMNFDVIK	11	633.825	2	Anatase_10x_LA_1_f10498	Anatase	10x	LA	1	0	2.69	2.395	0.417	0.417
sp|P68400|CSK21_HUMAN	ALDYCHSMGIMHR	13	530.905	3	Anatase_10x_LA_1_f10498	Anatase	10x	LA	1	0	2.01	2.188	0.403	0.403
sp|P68400|CSK21_HUMAN	ALDYCHSMGIMHR	13	795.854	2	Anatase_10x_LA_1_f10498	Anatase	10x	LA	1	0	2.59	3.083	0.452	0.452
sp|P68400|CSK21_HUMAN	ALDYCHSMGIMHR	13	398.43	4	Anatase_10x_LA_1_f10498	Anatase	10x	LA	1	0	1.6	1.818	0.224	0.224
sp|O43159|RRP8_HUMAN	ALEAASLSQHPPSLCIS#DS#EEEEEERK	27	1067.79	3	Anatase_10x_LA_1_f10498	Anatase	10x	LA	1	1	3.63	4.616	0.327	0.524
sp|Q9Y490|TLN1_HUMAN	ALEATTEHIRQELAVFCSPEPPAK	24	674.347	4	Anatase_10x_LA_1_f10498	Anatase	10x	LA	1	0	3.83	2.421	0.285	0.285
sp|P38159|RBMX_HUMAN	ALEAVFGK	8	417.74	2	Anatase_10x_LA_1_f10498	Anatase	10x	LA	1	0	1.45	1.966	0.335	0.335
sp|Q00610|CLH1_HUMAN	ALEHFTDLYDIKR	13	540.952	3	Anatase_10x_LA_1_f10498	Anatase	10x	LA	1	0	2.52	4.111	0.49	0.49
sp|Q00610|CLH1_HUMAN	ALEHFTDLYDIKR	13	405.966	4	Anatase_10x_LA_1_f10498	Anatase	10x	LA	1	0	2.18	2.152	0.383	0.383
sp|Q16891|MIC60_HUMAN	ALEHHRSEIQAEQDRK	16	649.666	3	Anatase_10x_LA_1_f10498	Anatase	10x	LA	1	0	2.28	3.805	0.349	0.349
sp|Q16891|MIC60_HUMAN	ALEHHRSEIQAEQDRK	16	649.666	3	Anatase_10x_LA_1_f10498	Anatase	10x	LA	1	0	2.29	2.84	0.448	0.448
sp|Q9NRF8|PYRG2_HUMAN	ALEHSALAINHK	12	435.243	3	Anatase_10x_LA_1_f10498	Anatase	10x	LA	1	0	2.04	4.035	0.485	0.485
sp|Q9NRF8|PYRG2_HUMAN	ALEHSALAINHK	12	652.361	2	Anatase_10x_LA_1_f10498	Anatase	10x	LA	1	0	2.65	3.25	0.47	0.47
sp|Q99832|TCPH_HUMAN	ALEIIPR	7	406.256	2	Anatase_10x_LA_1_f10498	Anatase	10x	LA	1	0	1.34	2.047	0.208	0.208
sp|Q66K74|MAP1S_HUMAN	ALELPLAASSIPRPRT#PS#PESHR	23	881.435	3	Anatase_10x_LA_1_f10498	Anatase	10x	LA	1	1	2.39	3.023	0.059	0.199
sp|P19338|NUCL_HUMAN	ALELTGLK	8	422.761	2	Anatase_10x_LA_1_f10498	Anatase	10x	LA	1	0	1.48	2.087	0.244	0.244
sp|Q9BXY0|MAK16_HUMAN	ALEQQEAESDS#SDT#EEKDDDDDDEEDVGKR	30	1187.11	3	Anatase_10x_LA_1_f10498	Anatase	10x	LA	1	1	3.82	3.898	0.002	0.561
sp|P00558|PGK1_HUMAN	ALESPERPFLAILGGAK	17	590.338	3	Anatase_10x_LA_1_f10498	Anatase	10x	LA	1	0	2.97	2.856	0.568	0.568
sp|Q14152|EIF3A_HUMAN	ALEVIKPAHILQEK	14	397.991	4	Anatase_10x_LA_1_f10498	Anatase	10x	LA	1	0	1.14	2.058	0.342	0.342
sp|Q14152|EIF3A_HUMAN	ALEVIKPAHILQEK	14	530.32	3	Anatase_10x_LA_1_f10498	Anatase	10x	LA	1	0	1.52	2.271	0.455	0.455
sp|Q14152|EIF3A_HUMAN	ALEVIKPAHILQEK	14	794.976	2	Anatase_10x_LA_1_f10498	Anatase	10x	LA	1	0	2.22	3.228	0.364	0.364
sp|P31939|PUR9_HUMAN	ALFEEVPELLTEAEKK	16	616.002	3	Anatase_10x_LA_1_f10498	Anatase	10x	LA	1	0	4.23	1.945	0.249	0.249
sp|Q13769|THOC5_HUMAN	ALFKPPEDS#QDDES#DS#DAEEEQTTK	25	1017.71	3	Anatase_10x_LA_1_f10498	Anatase	10x	LA	1	1	2.45	2.944	0.406	0.501
sp|Q13769|THOC5_HUMAN	ALFKPPEDS#QDDES#DS#DAEEEQTTK	25	1017.71	3	Anatase_10x_LA_1_f10498	Anatase	10x	LA	1	1	2.01	2.774	0.215	0.235
sp|Q13769|THOC5_HUMAN	ALFKPPEDS#QDDES#DS#DAEEEQTTK	25	1017.71	3	Anatase_10x_LA_1_f10498	Anatase	10x	LA	1	1	2.62	3.462	0.314	0.392
sp|Q13769|THOC5_HUMAN	ALFKPPEDSQDDES#DS#DAEEEQTTK	25	991.05	3	Anatase_10x_LA_1_f10498	Anatase	10x	LA	1	1	2.42	3.331	0.269	0.528
sp|P43403|ZAP70_HUMAN	ALGADDSY#Y#TAR	12	731.77	2	Anatase_10x_LA_1_f10498	Anatase	10x	LA	1	1	2.52	1.978	0.034	0.506
sp|O95714|HERC2_HUMAN	ALGDHSQAFLQAIADNNIQDHNVK	24	655.58	4	Anatase_10x_LA_1_f10498	Anatase	10x	LA	1	0	2.17	4.266	0.33	0.33
sp|O95714|HERC2_HUMAN	ALGDHSQAFLQAIADNNIQDHNVK	24	873.771	3	Anatase_10x_LA_1_f10498	Anatase	10x	LA	1	0	3.05	4.276	0.416	0.416
sp|P14649|MYL6B_HUMAN	ALGQNPTNAEVLK	13	677.872	2	Anatase_10x_LA_1_f10498	Anatase	10x	LA	1	0	2.38	2.48	0.407	0.407
sp|P23771|GATA3_HUMAN	ALGSHHTASPWNLS#PFSK	18	672.984	3	Anatase_10x_LA_1_f10498	Anatase	10x	LA	1	1	2.65	3.66	0.052	0.445
sp|Q6Y288|B3GLT_HUMAN	ALHDEEATIIHHYAFSENPTVFK	23	668.082	4	Anatase_10x_LA_1_f10498	Anatase	10x	LA	1	0	3.05	4.602	0.342	0.342
sp|P14868|SYDC_HUMAN	ALHHGIDLEK	10	378.209	3	Anatase_10x_LA_1_f10498	Anatase	10x	LA	1	0	1.68	3.4	0.408	0.408
sp|P14868|SYDC_HUMAN	ALHHGIDLEK	10	566.81	2	Anatase_10x_LA_1_f10498	Anatase	10x	LA	1	0	1.92	2.562	0.427	0.427
sp|Q9NXW2|DJB12_HUMAN	ALIESLNQKPQTAGDQPPPTDTTHATHRK	29	788.91	4	Anatase_10x_LA_1_f10498	Anatase	10x	LA	1	0	2.93	4.566	0.58	0.58
sp|Q13813|SPTN1_HUMAN	ALINADELASDVAGAEALLDRHQEHK	26	558.089	5	Anatase_10x_LA_1_f10498	Anatase	10x	LA	1	0	2.78	3.356	0.387	0.387
sp|P11831|SRF_HUMAN	ALIQTCLNSPDS#PPRSDPTTDQR	23	883.738	3	Anatase_10x_LA_1_f10498	Anatase	10x	LA	1	1	1.19	2.79	0.071	0.224
sp|Q7L2H7|EIF3M_HUMAN	ALKDPNAFLFDHLLTLKPVK	20	570.835	4	Anatase_10x_LA_1_f10498	Anatase	10x	LA	1	0	3.69	3.959	0.518	0.518
sp|Q9UKF6|CPSF3_HUMAN	ALKPPHVILVHGEQNEM*AR	19	539.543	4	Anatase_10x_LA_1_f10498	Anatase	10x	LA	1	0	1.93	3.016	0.364	0.364
sp|Q9UKF6|CPSF3_HUMAN	ALKPPHVILVHGEQNEMAR	19	535.543	4	Anatase_10x_LA_1_f10498	Anatase	10x	LA	1	0	1.2	4.13	0.631	0.631
sp|Q9UKF6|CPSF3_HUMAN	ALKPPHVILVHGEQNEMAR	19	713.723	3	Anatase_10x_LA_1_f10498	Anatase	10x	LA	1	0	2.3	2.869	0.431	0.431
sp|Q9UKF6|CPSF3_HUMAN	ALKPPHVILVHGEQNEMAR	19	428.636	5	Anatase_10x_LA_1_f10498	Anatase	10x	LA	1	0	1.03	1.842	0.294	0.294
sp|Q9UKF6|CPSF3_HUMAN	ALKPPHVILVHGEQNEMAR	19	713.722	3	Anatase_10x_LA_1_f10498	Anatase	10x	LA	1	0	1.52	3.424	0.532	0.532
sp|P08238|HS90B_HUMAN	ALLFIPR	7	415.27	2	Anatase_10x_LA_1_f10498	Anatase	10x	LA	1	0	3.62	1.677	0.259	0.259
sp|P07900|HS90A_HUMAN	ALLFVPR	7	408.261	2	Anatase_10x_LA_1_f10498	Anatase	10x	LA	1	0	1.96	1.829	0	0.248
sp|O14526|FCHO1_HUMAN	ALLGSYAHSVEDTHVQIGQVHEEFK	25	699.352	4	Anatase_10x_LA_1_f10498	Anatase	10x	LA	1	0	1.99	3.194	0.397	0.397
sp|P09622|DLDH_HUMAN	ALLNNSHYYHM*AHGK	15	591.284	3	Anatase_10x_LA_1_f10498	Anatase	10x	LA	1	0	2.29	2.872	0.48	0.48
sp|P09622|DLDH_HUMAN	ALLNNSHYYHM*AHGK	15	886.423	2	Anatase_10x_LA_1_f10498	Anatase	10x	LA	1	0	2.77	2.897	0.386	0.386
sp|P09622|DLDH_HUMAN	ALLNNSHYYHMAHGK	15	585.952	3	Anatase_10x_LA_1_f10498	Anatase	10x	LA	1	0	1.81	3.515	0.574	0.574
sp|P09622|DLDH_HUMAN	ALLNNSHYYHMAHGK	15	878.425	2	Anatase_10x_LA_1_f10498	Anatase	10x	LA	1	0	2.24	4.196	0.625	0.625
sp|Q9UNF1|MAGD2_HUMAN	ALLSLRS#PK	9	532.798	2	Anatase_10x_LA_1_f10498	Anatase	10x	LA	1	1	2.42	1.843	0.255	0.257
sp|Q76EJ3|S35D2_HUMAN	ALLTTY#GFPSPIFLGIGQMAAT#IMILY#VSK	30	1152.89	3	Anatase_10x_LA_1_f10498	Anatase	10x	LA	1	1	1.39	2.477	0.029	0.319
sp|Q13601|KRR1_HUMAN	ALNEHHVNATLDLIEGSM*TVCTTK	24	890.77	3	Anatase_10x_LA_1_f10498	Anatase	10x	LA	1	0	3.15	3.781	0.461	0.461
sp|P16383|GCFC2_HUMAN	ALNQAESFIGEHHLDHLK	18	412.613	5	Anatase_10x_LA_1_f10498	Anatase	10x	LA	1	0	1.02	3.15	0.319	0.319
sp|P09211|GSTP1_HUMAN	ALPGQLKPFETLLSQNQGGK	20	709.394	3	Anatase_10x_LA_1_f10498	Anatase	10x	LA	1	0	3.81	2.975	0.198	0.198
sp|Q8N6T7|SIR6_HUMAN	ALPPLPRPPT#PKLEPK	16	611.015	3	Anatase_10x_LA_1_f10498	Anatase	10x	LA	1	1	2.74	1.339	0.211	0.211
sp|Q9UPT8|ZC3H4_HUMAN	ALPTSKPEGSLHSS#PVGPSSSK	22	744.032	3	Anatase_10x_LA_1_f10498	Anatase	10x	LA	1	1	2.72	2.626	0.03	0.516
sp|Q9UPT8|ZC3H4_HUMAN	ALPTSKPEGSLHSS#PVGPSSSK	22	1115.54	2	Anatase_10x_LA_1_f10498	Anatase	10x	LA	1	1	2.02	2.412	0.126	0.436
sp|P40227|TCPZ_HUMAN	ALQFLEEVK	9	538.804	2	Anatase_10x_LA_1_f10498	Anatase	10x	LA	1	0	1.33	2.638	0.442	0.442
sp|P63010|AP2B1_HUMAN	ALQHMTDFAIQFNK	14	555.281	3	Anatase_10x_LA_1_f10498	Anatase	10x	LA	1	0	0.96	3.676	0.516	0.516
sp|O95475|SIX6_HUMAN	ALRAEGDGTPEVLGVATS#PAAS#LSSK	26	882.083	3	Anatase_10x_LA_1_f10498	Anatase	10x	LA	1	1	3.07	3.41	0.048	0.373
sp|O95475|SIX6_HUMAN	ALRAEGDGTPEVLGVATS#PAASLSSK	26	855.427	3	Anatase_10x_LA_1_f10498	Anatase	10x	LA	1	1	2.92	5.136	0.061	0.494
sp|O95475|SIX6_HUMAN	ALRAEGDGTPEVLGVATS#PAASLSSK	26	1282.64	2	Anatase_10x_LA_1_f10498	Anatase	10x	LA	1	1	4.08	2.188	0.045	0.393
sp|P49643|PRI2_HUMAN	ALRENHHLR	9	382.548	3	Anatase_10x_LA_1_f10498	Anatase	10x	LA	1	0	1.27	2.046	0.179	0.179
##sp|Q03014|HHEX_HUMAN	ALRKREPPSLYK	12	486.625	3	Anatase_10x_LA_1_f10498	Anatase	10x	LA	1	0	1.62	2.22	0.291	0.291
sp|O75151|PHF2_HUMAN	ALRPPT#SPGVFGALQNFK	18	660.679	3	Anatase_10x_LA_1_f10498	Anatase	10x	LA	1	1	6.65	2.774	0.053	0.353
sp|Q5SNT2|TM201_HUMAN	ALS#LGTIPSLTR	12	654.852	2	Anatase_10x_LA_1_f10498	Anatase	10x	LA	1	1	3.46	1.502	0.317	0.317
sp|Q02535|ID3_HUMAN	ALS#PVRGCYEAVCCLSER	18	736.321	3	Anatase_10x_LA_1_f10498	Anatase	10x	LA	1	1	1.89	2.723	0.107	0.286
sp|P04075|ALDOA_HUMAN	ALSDHHIYLEGTLLK	15	570.648	3	Anatase_10x_LA_1_f10498	Anatase	10x	LA	1	0	3.58	3.63	0.263	0.263
sp|P04075|ALDOA_HUMAN	ALSDHHIYLEGTLLK	15	855.468	2	Anatase_10x_LA_1_f10498	Anatase	10x	LA	1	0	3.99	2.877	0.519	0.519
sp|P04075|ALDOA_HUMAN	ALSDHHIYLEGTLLKPNM*VTPGHACTQK	28	787.65	4	Anatase_10x_LA_1_f10498	Anatase	10x	LA	1	0	2.44	6.569	0.522	0.522
sp|P04075|ALDOA_HUMAN	ALSDHHIYLEGTLLKPNM*VTPGHACTQK	28	630.322	5	Anatase_10x_LA_1_f10498	Anatase	10x	LA	1	0	2.47	5.338	0.516	0.516
sp|P04075|ALDOA_HUMAN	ALSDHHIYLEGTLLKPNM*VTPGHACTQK	28	1049.86	3	Anatase_10x_LA_1_f10498	Anatase	10x	LA	1	0	1.91	4.003	0.454	0.454
sp|P04075|ALDOA_HUMAN	ALSDHHIYLEGTLLKPNM*VTPGHACTQK	28	630.321	5	Anatase_10x_LA_1_f10498	Anatase	10x	LA	1	0	1.88	4.312	0.542	0.542
sp|P04075|ALDOA_HUMAN	ALSDHHIYLEGTLLKPNM*VTPGHACTQK	28	630.321	5	Anatase_10x_LA_1_f10498	Anatase	10x	LA	1	0	1.87	3.777	0.424	0.424
sp|P04075|ALDOA_HUMAN	ALSDHHIYLEGTLLKPNMVTPGHACTQK	28	627.123	5	Anatase_10x_LA_1_f10498	Anatase	10x	LA	1	0	3.27	5.945	0.571	0.571
sp|P04075|ALDOA_HUMAN	ALSDHHIYLEGTLLKPNMVTPGHACTQK	28	783.652	4	Anatase_10x_LA_1_f10498	Anatase	10x	LA	1	0	2.67	6.043	0.673	0.673
sp|P04075|ALDOA_HUMAN	ALSDHHIYLEGTLLKPNMVTPGHACTQK	28	1044.53	3	Anatase_10x_LA_1_f10498	Anatase	10x	LA	1	0	2.66	3.302	0.261	0.261
sp|P04075|ALDOA_HUMAN	ALSDHHIYLEGTLLKPNMVTPGHACTQK	28	1044.53	3	Anatase_10x_LA_1_f10498	Anatase	10x	LA	1	0	1.82	3.555	0.462	0.462
sp|P04075|ALDOA_HUMAN	ALSDHHIYLEGTLLKPNMVTPGHACTQK	28	627.122	5	Anatase_10x_LA_1_f10498	Anatase	10x	LA	1	0	2.18	5.191	0.515	0.515
sp|P04075|ALDOA_HUMAN	ALSDHHIYLEGTLLKPNMVTPGHACTQK	28	627.117	5	Anatase_10x_LA_1_f10498	Anatase	10x	LA	1	0	-6.33	4.944	0.475	0.475
sp|P09972|ALDOC_HUMAN	ALSDHHVYLEGTLLKPNM*VTPGHACPIK	28	623.724	5	Anatase_10x_LA_1_f10498	Anatase	10x	LA	1	0	1.99	4.132	0.438	0.438
sp|P09972|ALDOC_HUMAN	ALSDHHVYLEGTLLKPNMVTPGHACPIK	28	620.526	5	Anatase_10x_LA_1_f10498	Anatase	10x	LA	1	0	3.62	5.566	0.609	0.609
sp|P09972|ALDOC_HUMAN	ALSDHHVYLEGTLLKPNMVTPGHACPIK	28	775.406	4	Anatase_10x_LA_1_f10498	Anatase	10x	LA	1	0	4.06	6.317	0.636	0.636
sp|Q5JTH9|RRP12_HUMAN	ALSQAAVEEEEEEEEEEEPAQGKGDS#IEEILADSEDEEDNEEEERSR	47	1354.81	4	Anatase_10x_LA_1_f10498	Anatase	10x	LA	1	1	2.84	3.318	0.025	0.289
sp|Q5JTH9|RRP12_HUMAN	ALSQAAVEEEEEEEEEEEPAQGKGDSIEEILADSEDEEDNEEEERS#R	47	1354.81	4	Anatase_10x_LA_1_f10498	Anatase	10x	LA	1	1	3.23	4.285	0.021	0.355
sp|Q6Y7W6|PERQ2_HUMAN	ALSSGGSITSPPLS#PALPK	19	930.482	2	Anatase_10x_LA_1_f10498	Anatase	10x	LA	1	1	3.34	2.276	0.056	0.372
sp|P11717|MPRI_HUMAN	ALSSLHGDDQDS#EDEVLTIPEVK	23	1289.09	2	Anatase_10x_LA_1_f10498	Anatase	10x	LA	1	1	1.21	4.111	0.356	0.58
sp|P11717|MPRI_HUMAN	ALSSLHGDDQDS#EDEVLTIPEVK	23	859.727	3	Anatase_10x_LA_1_f10498	Anatase	10x	LA	1	1	2.18	3.756	0.152	0.492
sp|Q6R327|RICTR_HUMAN	ALSYAS#LDKEDLLSPINQNTLQR	23	890.447	3	Anatase_10x_LA_1_f10498	Anatase	10x	LA	1	1	2.81	2.756	0.014	0.272
sp|O00231|PSD11_HUMAN	ALTDYRAELRDDPIISTHLAK	21	480.461	5	Anatase_10x_LA_1_f10498	Anatase	10x	LA	1	0	1.5	2.512	0.416	0.416
sp|Q9NUL3|STAU2_HUMAN	ALTESTLPKPVQKPPK	16	434.26	4	Anatase_10x_LA_1_f10498	Anatase	10x	LA	1	0	1.22	2.275	0.317	0.317
sp|P56192|SYMC_HUMAN	ALTHIDHSLSR	11	417.227	3	Anatase_10x_LA_1_f10498	Anatase	10x	LA	1	0	2.34	2.68	0.353	0.353
sp|A4D2P6|GRD2I_HUMAN	ALTS#DLADLHGTISEIQDACQSIS#PSS#EDK	30	1143.47	3	Anatase_10x_LA_1_f10498	Anatase	10x	LA	1	1	-1.88	1.975	0.007	0.419
sp|P26038|MOES_HUMAN	ALTSELANARDESKK	15	408.97	4	Anatase_10x_LA_1_f10498	Anatase	10x	LA	1	0	1.21	1.99	0.241	0.241
sp|Q03701|CEBPZ_HUMAN	ALTVAHELLCNKPEEEK	17	661.008	3	Anatase_10x_LA_1_f10498	Anatase	10x	LA	1	0	2.27	3.7	0.333	0.333
sp|P68371|TBB4B_HUMAN	ALTVPELTQQMFDAK	15	846.441	2	Anatase_10x_LA_1_f10498	Anatase	10x	LA	1	0	4.2	2.016	0.4	0.4
sp|P07437|TBB5_HUMAN	ALTVPELTQQVFDAK	15	830.453	2	Anatase_10x_LA_1_f10498	Anatase	10x	LA	1	0	2.56	3.162	0.489	0.489
sp|P19338|NUCL_HUMAN	ALVAT#PGKK	9	482.766	2	Anatase_10x_LA_1_f10498	Anatase	10x	LA	1	1	2.06	2.341	0.412	0.412
sp|O43175|SERA_HUMAN	ALVDHENVISCPHLGASTK	19	512.762	4	Anatase_10x_LA_1_f10498	Anatase	10x	LA	1	0	1.23	2.312	0.305	0.305
sp|Q9BQG0|MBB1A_HUMAN	ALVDILSEVSK	11	587.343	2	Anatase_10x_LA_1_f10498	Anatase	10x	LA	1	0	5.49	2.754	0.47	0.47
sp|Q9H6F5|CCD86_HUMAN	ALVEFESNPEETREPGS#PPSVQR	23	879.075	3	Anatase_10x_LA_1_f10498	Anatase	10x	LA	1	1	2.86	3.92	0.23	0.478
sp|Q07021|C1QBP_HUMAN	ALVLDCHYPEDEVGQEDEAESDIFSIR	27	1046.14	3	Anatase_10x_LA_1_f10498	Anatase	10x	LA	1	0	3.29	3.953	0.461	0.461
sp|Q07021|C1QBP_HUMAN	ALVLDCHYPEDEVGQEDEAESDIFSIR	27	1046.14	3	Anatase_10x_LA_1_f10498	Anatase	10x	LA	1	0	3.03	5.213	0.425	0.425
sp|Q5VTR2|BRE1A_HUMAN	ALVVPEPEPDSDS#NQER	17	981.431	2	Anatase_10x_LA_1_f10498	Anatase	10x	LA	1	1	2.51	2.544	0.007	0.492
sp|Q86VR2|F134C_HUMAN	AM*DNHS#DS#EEELAAFCPQLDDSTVAR	26	1028.73	3	Anatase_10x_LA_1_f10498	Anatase	10x	LA	1	1	3.39	5.001	0.498	0.498
sp|P58876|H2B1D_HUMAN	AM*GIM*NSFVNDIFER	15	888.411	2	Anatase_10x_LA_1_f10498	Anatase	10x	LA	1	0	3.24	2.689	0.437	0.437
sp|Q86VR2|F134C_HUMAN	AMDNHS#DS#EEELAAFCPQLDDSTVAR	26	1023.4	3	Anatase_10x_LA_1_f10498	Anatase	10x	LA	1	1	1.64	2.472	0.238	0.238
sp|Q86VR2|F134C_HUMAN	AMDNHS#DS#EEELAAFCPQLDDSTVAR	26	1023.4	3	Anatase_10x_LA_1_f10498	Anatase	10x	LA	1	1	2.84	4.695	0.506	0.506
sp|P58876|H2B1D_HUMAN	AMGIM*NSFVNDIFER	15	880.413	2	Anatase_10x_LA_1_f10498	Anatase	10x	LA	1	0	2.06	2.687	0.184	0.395
sp|P46013|KI67_HUMAN	AMHTPKPSVGEEK	13	470.907	3	Anatase_10x_LA_1_f10498	Anatase	10x	LA	1	0	1.83	2.319	0.272	0.272
sp|Q9Y383|LC7L2_HUMAN	AMLDQLMGT#SRDGDTTR	17	974.421	2	Anatase_10x_LA_1_f10498	Anatase	10x	LA	1	1	2.15	1.527	0.052	0.274
sp|Q9Y383|LC7L2_HUMAN	AMLDQLMGT#SRDGDTTR	17	649.95	3	Anatase_10x_LA_1_f10498	Anatase	10x	LA	1	1	2.3	3.086	0.035	0.412
sp|O95295|SNAPN_HUMAN	AMLDSGIYPPGS#PGK	15	785.356	2	Anatase_10x_LA_1_f10498	Anatase	10x	LA	1	1	1.85	1.898	0.32	0.32
sp|Q9Y618|NCOR2_HUMAN	ANAS#PQKPLDLK	12	681.346	2	Anatase_10x_LA_1_f10498	Anatase	10x	LA	1	1	1.65	2.028	0.24	0.24
sp|P55060|XPO2_HUMAN	ANDHQGFYLLNSIIEHM*PPESVDQYRK	27	805.143	4	Anatase_10x_LA_1_f10498	Anatase	10x	LA	1	0	4.11	3.917	0.337	0.337
sp|P55060|XPO2_HUMAN	ANDHQGFYLLNSIIEHMPPESVDQYRK	27	801.143	4	Anatase_10x_LA_1_f10498	Anatase	10x	LA	1	0	3.02	4.817	0.425	0.425
sp|P55060|XPO2_HUMAN	ANDHQGFYLLNSIIEHMPPESVDQYRK	27	1067.85	3	Anatase_10x_LA_1_f10498	Anatase	10x	LA	1	0	0.89	3.077	0.257	0.257
sp|Q9P253|VPS18_HUMAN	ANEPNHVELGRK	12	455.242	3	Anatase_10x_LA_1_f10498	Anatase	10x	LA	1	0	2.31	2.083	0.315	0.315
sp|P61254|RL26_HUMAN	ANGTTVHVGIHPSK	14	473.257	3	Anatase_10x_LA_1_f10498	Anatase	10x	LA	1	0	2.26	1.923	0.45	0.45
sp|P61254|RL26_HUMAN	ANGTTVHVGIHPSK	14	709.383	2	Anatase_10x_LA_1_f10498	Anatase	10x	LA	1	0	2.72	2.992	0.469	0.469
sp|Q96G21|IMP4_HUMAN	ANGVTDLLVVHEHR	14	520.616	3	Anatase_10x_LA_1_f10498	Anatase	10x	LA	1	0	2.26	1.756	0.341	0.341
sp|P00491|PNPH_HUMAN	ANHEEVLAAGK	11	380.201	3	Anatase_10x_LA_1_f10498	Anatase	10x	LA	1	0	1.97	3.48	0.241	0.241
sp|O14497|ARI1A_HUMAN	ANHEGSWPSHGTR	13	718.328	2	Anatase_10x_LA_1_f10498	Anatase	10x	LA	1	0	1.65	1.708	0.42	0.42
sp|O14497|ARI1A_HUMAN	ANHEGSWPSHGTR	13	479.221	3	Anatase_10x_LA_1_f10498	Anatase	10x	LA	1	0	1.6	3.469	0.397	0.397
sp|Q8WTS6|SETD7_HUMAN	ANHSFTPNCIYDMFVHPR	18	552.256	4	Anatase_10x_LA_1_f10498	Anatase	10x	LA	1	0	2.57	3.3	0.188	0.188
sp|O15027|SC16A_HUMAN	ANHSSHQEDTYGALDFTLSR	20	750.347	3	Anatase_10x_LA_1_f10498	Anatase	10x	LA	1	0	2.73	5.253	0.632	0.632
sp|O15027|SC16A_HUMAN	ANHSSHQEDTYGALDFTLSR	20	563.012	4	Anatase_10x_LA_1_f10498	Anatase	10x	LA	1	0	2.24	3.167	0.187	0.187
sp|Q99570|PI3R4_HUMAN	ANIVDQSHLHDSSQK	15	839.913	2	Anatase_10x_LA_1_f10498	Anatase	10x	LA	1	0	2.28	3.616	0.609	0.609
sp|P55060|XPO2_HUMAN	ANIVHLMLSSPEQIQK	16	603.33	3	Anatase_10x_LA_1_f10498	Anatase	10x	LA	1	0	1.49	2.571	0.204	0.204
sp|Q99873|ANM1_HUMAN	ANKLDHVVTIIK	12	450.942	3	Anatase_10x_LA_1_f10498	Anatase	10x	LA	1	0	1.13	4.974	0.477	0.477
sp|Q99873|ANM1_HUMAN	ANKLDHVVTIIK	12	675.91	2	Anatase_10x_LA_1_f10498	Anatase	10x	LA	1	0	2.12	3.335	0.518	0.518
sp|Q9ULW0|TPX2_HUMAN	ANLQQAIVT#PLKPVDNTYYK	20	1178.6	2	Anatase_10x_LA_1_f10498	Anatase	10x	LA	1	1	2.42	1.981	0.332	0.332
sp|Q9ULW0|TPX2_HUMAN	ANLQQAIVT#PLKPVDNTYYK	20	786.072	3	Anatase_10x_LA_1_f10498	Anatase	10x	LA	1	1	3.11	3.279	0.272	0.379
sp|Q9H246|CA021_HUMAN	ANMHISES#QQEFFR	14	902.381	2	Anatase_10x_LA_1_f10498	Anatase	10x	LA	1	1	1.35	3.521	0.13	0.532
sp|Q9BZF1|OSBL8_HUMAN	ANNLHSGDNFQLNDS#EIER	19	1126.99	2	Anatase_10x_LA_1_f10498	Anatase	10x	LA	1	1	3.36	2.154	0.34	0.34
sp|Q9BZF1|OSBL8_HUMAN	ANNLHSGDNFQLNDSEIER	19	725.003	3	Anatase_10x_LA_1_f10498	Anatase	10x	LA	1	0	1.51	3.094	0.191	0.191
sp|Q14149|MORC3_HUMAN	ANNM*GVGVVGIIECNFLKPTHNK	23	632.827	4	Anatase_10x_LA_1_f10498	Anatase	10x	LA	1	0	3.76	2.752	0.211	0.211
sp|P62266|RS23_HUMAN	ANPFGGASHAK	11	528.766	2	Anatase_10x_LA_1_f10498	Anatase	10x	LA	1	0	2.41	2.141	0.579	0.579
sp|P36402|TCF7_HUMAN	ANQPPHGVPQLSLYEHFNSPHPTPAPADISQK	32	869.438	4	Anatase_10x_LA_1_f10498	Anatase	10x	LA	1	0	3.15	4.943	0.488	0.488
sp|O15530|PDPK1_HUMAN	ANS#FVGTAQYVSPELLTEK	19	1067.51	2	Anatase_10x_LA_1_f10498	Anatase	10x	LA	1	1	3.4	1.952	0.255	0.255
sp|Q9UFC0|LRWD1_HUMAN	ANS#PEKPPEAGAAHK	15	528.58	3	Anatase_10x_LA_1_f10498	Anatase	10x	LA	1	1	2.84	2.604	0.209	0.209
sp|Q9UFC0|LRWD1_HUMAN	ANS#PEKPPEAGAAHK	15	792.366	2	Anatase_10x_LA_1_f10498	Anatase	10x	LA	1	1	1.66	1.811	0.381	0.381
sp|Q9UFC0|LRWD1_HUMAN	ANS#PEKPPEAGAAHKPR	17	612.965	3	Anatase_10x_LA_1_f10498	Anatase	10x	LA	1	1	2.13	3.783	0.51	0.51
sp|Q9UFC0|LRWD1_HUMAN	ANS#PEKPPEAGAAHKPR	17	459.975	4	Anatase_10x_LA_1_f10498	Anatase	10x	LA	1	1	1.73	2.766	0.319	0.319
sp|Q96B97|SH3K1_HUMAN	ANS#PSLFGTEGKPK	14	756.86	2	Anatase_10x_LA_1_f10498	Anatase	10x	LA	1	1	2.43	2.638	0.23	0.482
sp|Q8WUA4|TF3C2_HUMAN	ANSHFLVSAGSDRK	14	496.924	3	Anatase_10x_LA_1_f10498	Anatase	10x	LA	1	0	1.05	3.112	0.353	0.353
sp|Q8WUA4|TF3C2_HUMAN	ANSHFLVSAGSDRK	14	744.883	2	Anatase_10x_LA_1_f10498	Anatase	10x	LA	1	0	2.51	1.61	0.266	0.266
sp|Q96RT1|LAP2_HUMAN	ANTAYHLHQR	10	605.809	2	Anatase_10x_LA_1_f10498	Anatase	10x	LA	1	0	2.93	2.854	0.409	0.409
sp|Q86TI0|TBCD1_HUMAN	ANTLS#HFPIECQEPPQPARGS#PGVSQR	27	1040.8	3	Anatase_10x_LA_1_f10498	Anatase	10x	LA	1	1	3.7	2.763	0.033	0.294
sp|Q9ULJ3|ZBT21_HUMAN	ANTNKPHVPKPIEPLHNLSLTEK	23	645.11	4	Anatase_10x_LA_1_f10498	Anatase	10x	LA	1	0	1.85	2.275	0.203	0.203
sp|P0DJD0|RGPD1_HUMAN	ANTSGDFEKDDDACKTEDSDDIHFEPVVQMPEK	33	943.16	4	Anatase_10x_LA_1_f10498	Anatase	10x	LA	1	0	2.2	4.835	0.496	0.496
sp|P0DJD0|RGPD1_HUMAN	ANTSGDFEKDDDACKTEDSDDIHFEPVVQMPEK	33	943.16	4	Anatase_10x_LA_1_f10498	Anatase	10x	LA	1	0	2.2	4.347	0.412	0.412
sp|P49792|RBP2_HUMAN	ANTSGDFEKDDDAYKTEDSDDIHFEPVVQM*PEK	33	947.918	4	Anatase_10x_LA_1_f10498	Anatase	10x	LA	1	0	3.43	4.026	0.374	0.374
sp|P49792|RBP2_HUMAN	ANTSGDFEKDDDAYKTEDSDDIHFEPVVQMPEK	33	943.919	4	Anatase_10x_LA_1_f10498	Anatase	10x	LA	1	0	2.71	6.122	0.572	0.572
sp|P49792|RBP2_HUMAN	ANTSGDFEKDDDAYKTEDSDDIHFEPVVQMPEK	33	943.919	4	Anatase_10x_LA_1_f10498	Anatase	10x	LA	1	0	2.77	5.112	0.433	0.433
sp|P49792|RBP2_HUMAN	ANTSGDFEKDDDAYKTEDSDDIHFEPVVQMPEK	33	1258.22	3	Anatase_10x_LA_1_f10498	Anatase	10x	LA	1	0	3.13	3.887	0.437	0.437
sp|P49792|RBP2_HUMAN	ANTSGDFEKDDDAYKTEDSDDIHFEPVVQMPEK	33	1258.22	3	Anatase_10x_LA_1_f10498	Anatase	10x	LA	1	0	2.94	2.897	0.362	0.362
sp|Q92530|PSMF1_HUMAN	ANVSS#PHREFPPATAR	16	606.289	3	Anatase_10x_LA_1_f10498	Anatase	10x	LA	1	1	2.58	2.074	0.107	0.206
sp|Q92530|PSMF1_HUMAN	ANVSS#PHREFPPATAR	16	606.289	3	Anatase_10x_LA_1_f10498	Anatase	10x	LA	1	1	1.96	1.758	0.075	0.2
sp|Q5JTH9|RRP12_HUMAN	APAHHPAAISTAK	13	424.568	3	Anatase_10x_LA_1_f10498	Anatase	10x	LA	1	0	2.03	2.969	0.519	0.519
sp|Q5JTH9|RRP12_HUMAN	APAHHPAAISTAK	13	636.348	2	Anatase_10x_LA_1_f10498	Anatase	10x	LA	1	0	2.29	2.547	0.294	0.294
sp|Q9Y4K1|AIM1_HUMAN	APAKES#PPK	9	502.745	2	Anatase_10x_LA_1_f10498	Anatase	10x	LA	1	1	1.94	2.424	0.455	0.455
sp|P61247|RS3A_HUMAN	APAMFNIR	8	460.246	2	Anatase_10x_LA_1_f10498	Anatase	10x	LA	1	0	2.19	2.128	0.473	0.473
sp|P04843|RPN1_HUMAN	APDELHYTYLDTFGRPVIVAYKK	23	674.86	4	Anatase_10x_LA_1_f10498	Anatase	10x	LA	1	0	3.1	4.923	0.596	0.596
sp|P04843|RPN1_HUMAN	APDELHYTYLDTFGRPVIVAYKK	23	540.089	5	Anatase_10x_LA_1_f10498	Anatase	10x	LA	1	0	2.47	3.595	0.624	0.624
sp|P04843|RPN1_HUMAN	APDELHYTYLDTFGRPVIVAYKK	23	899.476	3	Anatase_10x_LA_1_f10498	Anatase	10x	LA	1	0	2.39	3.29	0.302	0.302
sp|Q8TCJ2|STT3B_HUMAN	APDNRETLDHKPR	13	774.9	2	Anatase_10x_LA_1_f10498	Anatase	10x	LA	1	0	2.61	1.778	0.274	0.274
sp|Q8TCJ2|STT3B_HUMAN	APDNRETLDHKPR	13	516.935	3	Anatase_10x_LA_1_f10498	Anatase	10x	LA	1	0	2.09	3.689	0.391	0.391
sp|Q96B97|SH3K1_HUMAN	APEKPLHEVPS#GNSLLSSETILR	23	852.104	3	Anatase_10x_LA_1_f10498	Anatase	10x	LA	1	1	2.74	2.981	0.132	0.398
sp|P52566|GDIR2_HUMAN	APEPHVEEDDDDELDSK	17	647.275	3	Anatase_10x_LA_1_f10498	Anatase	10x	LA	1	0	2.6	5.282	0.574	0.574
sp|P52566|GDIR2_HUMAN	APEPHVEEDDDDELDSK	17	970.408	2	Anatase_10x_LA_1_f10498	Anatase	10x	LA	1	0	2.53	5.426	0.565	0.565
sp|Q6EEV4|GL1AD_HUMAN	APES#PPSADPALVAGPAEEAECPPPRQPQPAQNVLAAPR	39	1354.99	3	Anatase_10x_LA_1_f10498	Anatase	10x	LA	1	1	1.81	2.626	0.047	0.315
sp|Q5PSV4|BRM1L_HUMAN	APEY#LEPLATLQENM*QIRTKVAGIYR	26	775.896	4	Anatase_10x_LA_1_f10498	Anatase	10x	LA	1	1	2.71	3.111	0.222	0.222
sp|Q58FF7|H90B3_HUMAN	APFDLFENKK	10	403.549	3	Anatase_10x_LA_1_f10498	Anatase	10x	LA	1	0	1.6	2.425	0.518	0.518
sp|P07900|HS90A_HUMAN	APFDLFENRK	10	412.885	3	Anatase_10x_LA_1_f10498	Anatase	10x	LA	1	0	1.73	1.558	0.193	0.193
sp|P10809|CH60_HUMAN	APGFGDNRK	9	481.247	2	Anatase_10x_LA_1_f10498	Anatase	10x	LA	1	0	2.1	2.284	0.363	0.363
##sp|Q9Y2Q9|RT28_HUMAN	APGMQTLPSHRLMSAFSEVNKPS#GK	25	550.87	5	Anatase_10x_LA_1_f10498	Anatase	10x	LA	1	1	2.67	2.352	0.19	0.19
sp|Q6JBY9|CPZIP_HUMAN	APGS#PLSSEGAAGEGVR	17	811.367	2	Anatase_10x_LA_1_f10498	Anatase	10x	LA	1	1	2.93	3.03	0.136	0.518
sp|Q07020|RL18_HUMAN	APGTPHSHTK	10	516.766	2	Anatase_10x_LA_1_f10498	Anatase	10x	LA	1	0	2.15	2.857	0.488	0.488
sp|Q07020|RL18_HUMAN	APGTPHSHTKPYVR	14	774.409	2	Anatase_10x_LA_1_f10498	Anatase	10x	LA	1	0	2.55	1.798	0.197	0.197
sp|Q07020|RL18_HUMAN	APGTPHSHTKPYVR	14	516.608	3	Anatase_10x_LA_1_f10498	Anatase	10x	LA	1	0	1.78	2.209	0.397	0.397
sp|Q07020|RL18_HUMAN	APGTPHSHTKPYVR	14	387.708	4	Anatase_10x_LA_1_f10498	Anatase	10x	LA	1	0	1.18	1.744	0.413	0.413
sp|Q06265|EXOS9_HUMAN	APIDTS#DVEEK	11	642.275	2	Anatase_10x_LA_1_f10498	Anatase	10x	LA	1	1	1.85	1.753	0.186	0.31
sp|Q92841|DDX17_HUMAN	APILIATDVASR	12	613.861	2	Anatase_10x_LA_1_f10498	Anatase	10x	LA	1	0	2.98	3.032	0.56	0.56
sp|P36578|RL4_HUMAN	APIRPDIVNFVHTNLR	16	621.353	3	Anatase_10x_LA_1_f10498	Anatase	10x	LA	1	0	2.2	3.033	0.303	0.303
sp|P36578|RL4_HUMAN	APIRPDIVNFVHTNLRK	17	498.291	4	Anatase_10x_LA_1_f10498	Anatase	10x	LA	1	0	3.27	2.859	0.618	0.618
sp|P36578|RL4_HUMAN	APIRPDIVNFVHTNLRK	17	398.834	5	Anatase_10x_LA_1_f10498	Anatase	10x	LA	1	0	1.96	1.667	0.241	0.241
sp|P36578|RL4_HUMAN	APIRPDIVNFVHTNLRK	17	664.052	3	Anatase_10x_LA_1_f10498	Anatase	10x	LA	1	0	3.77	4.085	0.644	0.644
sp|P35637|FUS_HUMAN	APKPDGPGGGPGGSHM*GGNYGDDR	24	756.996	3	Anatase_10x_LA_1_f10498	Anatase	10x	LA	1	0	2.5	2.693	0.321	0.321
sp|P35637|FUS_HUMAN	APKPDGPGGGPGGSHM*GGNYGDDR	24	756.996	3	Anatase_10x_LA_1_f10498	Anatase	10x	LA	1	0	2.46	2.623	0.351	0.351
sp|P35637|FUS_HUMAN	APKPDGPGGGPGGSHM*GGNYGDDRR	25	809.03	3	Anatase_10x_LA_1_f10498	Anatase	10x	LA	1	0	2.84	1.837	0.232	0.232
sp|P35637|FUS_HUMAN	APKPDGPGGGPGGSHMGGNYGDDR	24	1126.99	2	Anatase_10x_LA_1_f10498	Anatase	10x	LA	1	0	2.51	2.724	0.408	0.408
sp|P35637|FUS_HUMAN	APKPDGPGGGPGGSHMGGNYGDDR	24	564	4	Anatase_10x_LA_1_f10498	Anatase	10x	LA	1	0	2.37	3.237	0.512	0.512
sp|P35637|FUS_HUMAN	APKPDGPGGGPGGSHMGGNYGDDR	24	751.665	3	Anatase_10x_LA_1_f10498	Anatase	10x	LA	1	0	2.6	3.863	0.634	0.634
sp|Q96K17|BT3L4_HUMAN	APKPEDIDEEDDDVPDLVENFDEAS#KNEAN	30	1147.16	3	Anatase_10x_LA_1_f10498	Anatase	10x	LA	1	1	8.34	3.686	0.405	0.405
sp|Q96K17|BT3L4_HUMAN	APKPEDIDEEDDDVPDLVENFDEAS#KNEAN	30	1147.15	3	Anatase_10x_LA_1_f10498	Anatase	10x	LA	1	1	1.25	3.964	0.445	0.445
sp|Q8NHM5|KDM2B_HUMAN	APKPPTDGS#TSPTSTPSEDQEALGK	25	860.06	3	Anatase_10x_LA_1_f10498	Anatase	10x	LA	1	1	3.39	3.891	0.026	0.523
sp|P20290|BTF3_HUMAN	APLATGEDDDDEVPDLVENFDEASK	25	1346.1	2	Anatase_10x_LA_1_f10498	Anatase	10x	LA	1	0	1.97	2.749	0.403	0.403
sp|Q06323|PSME1_HUMAN	APLDIPVPDPVK	12	630.865	2	Anatase_10x_LA_1_f10498	Anatase	10x	LA	1	0	2.24	2.681	0.514	0.514
sp|P55160|NCKPL_HUMAN	APLHLHENPDLAK	13	485.597	3	Anatase_10x_LA_1_f10498	Anatase	10x	LA	1	0	1.65	3.508	0.486	0.486
sp|P41252|SYIC_HUMAN	APLKPYPVS#PSDK	13	739.87	2	Anatase_10x_LA_1_f10498	Anatase	10x	LA	1	1	2.15	2.64	0.038	0.485
sp|P41252|SYIC_HUMAN	APLKPYPVS#PSDK	13	739.87	2	Anatase_10x_LA_1_f10498	Anatase	10x	LA	1	1	2.57	2.514	0.002	0.433
sp|Q6P3S6|FBX42_HUMAN	APLSPSLNS#RPSPISATPPALVPETR	26	912.48	3	Anatase_10x_LA_1_f10498	Anatase	10x	LA	1	1	4.39	3.72	0.06	0.405
sp|Q99497|PARK7_HUMAN	APLVLKD	7	378.237	2	Anatase_10x_LA_1_f10498	Anatase	10x	LA	1	0	1.59	1.834	0.225	0.225
sp|Q9GZL7|WDR12_HUMAN	APLYDLAAHEDK	12	671.837	2	Anatase_10x_LA_1_f10498	Anatase	10x	LA	1	0	2.45	1.529	0.264	0.264
sp|P52566|GDIR2_HUMAN	APNVVVTR	8	428.257	2	Anatase_10x_LA_1_f10498	Anatase	10x	LA	1	0	1.58	2.168	0.426	0.426
sp|Q7Z3D6|CN159_HUMAN	APPGCLTPERIPEVHHISQDPLHYSIASVSASQK	34	931.228	4	Anatase_10x_LA_1_f10498	Anatase	10x	LA	1	0	4.08	3.276	0.345	0.345
sp|Q7Z3D6|CN159_HUMAN	APPGCLTPERIPEVHHISQDPLHYSIASVSASQK	34	931.228	4	Anatase_10x_LA_1_f10498	Anatase	10x	LA	1	0	4.08	3.825	0.375	0.375
sp|P46379|BAG6_HUMAN	APPQTHLPSGASSGTGSASATHGGGS#PPGTR	31	955.771	3	Anatase_10x_LA_1_f10498	Anatase	10x	LA	1	1	2.44	2.954	0.03	0.378
sp|P46379|BAG6_HUMAN	APPQTHLPSGASSGTGSASATHGGGS#PPGTR	31	955.772	3	Anatase_10x_LA_1_f10498	Anatase	10x	LA	1	1	3.74	3.919	0.137	0.384
sp|P46379|BAG6_HUMAN	APPQTHLPSGASSGTGSASATHGGGS#PPGTRGPGASVHDR	40	936.186	4	Anatase_10x_LA_1_f10498	Anatase	10x	LA	1	1	2.56	3.374	0.066	0.308
sp|P46379|BAG6_HUMAN	APPQTHLPSGASSGTGSASATHGGGSPPGT#R	31	717.08	4	Anatase_10x_LA_1_f10498	Anatase	10x	LA	1	1	2.42	4.121	0.04	0.53
sp|P46379|BAG6_HUMAN	APPQTHLPSGASSGTGSASATHGGGSPPGTR	31	929.115	3	Anatase_10x_LA_1_f10498	Anatase	10x	LA	1	0	2.01	2.883	0.249	0.249
sp|Q15418|KS6A1_HUMAN	APQAPLHSVVQQLHGK	16	855.478	2	Anatase_10x_LA_1_f10498	Anatase	10x	LA	1	0	2.09	1.683	0.225	0.225
sp|Q9Y6A5|TACC3_HUMAN	APQEVEEDDGRSGAGEDPPMPAS#RGSYHLDWDK	33	920.393	4	Anatase_10x_LA_1_f10498	Anatase	10x	LA	1	1	1.98	4.184	0.056	0.455
sp|Q8IYB3|SRRM1_HUMAN	APQTSSS#PPPVRR	13	487.241	3	Anatase_10x_LA_1_f10498	Anatase	10x	LA	1	1	2.52	1.865	0.007	0.195
sp|P49006|MRP_HUMAN	APRGDVTAEEAAGAS#PAK	18	889.412	2	Anatase_10x_LA_1_f10498	Anatase	10x	LA	1	1	2.35	2.114	0.223	0.223
sp|O15014|ZN609_HUMAN	APS#LTDLVK	9	512.261	2	Anatase_10x_LA_1_f10498	Anatase	10x	LA	1	1	2.88	2.144	0.08	0.446
sp|O75179|ANR17_HUMAN	APS#PAPSSVPLGSEK	15	752.36	2	Anatase_10x_LA_1_f10498	Anatase	10x	LA	1	1	2.61	2.355	0.381	0.482
sp|O75179|ANR17_HUMAN	APS#PAPSSVPLGSEKPSNVSQDR	23	796.382	3	Anatase_10x_LA_1_f10498	Anatase	10x	LA	1	1	2.98	3.021	0.166	0.366
sp|Q9NRA8|4ET_HUMAN	APS#PPLSQVFQTR	13	754.371	2	Anatase_10x_LA_1_f10498	Anatase	10x	LA	1	1	3.38	2.337	0.316	0.316
sp|P0C7T5|ATX1L_HUMAN	APSAT#SPSGQLPHHSSTQPLDLAPGR	26	897.098	3	Anatase_10x_LA_1_f10498	Anatase	10x	LA	1	1	2.56	2.686	0.002	0.306
sp|Q9NZB2|F120A_HUMAN	APSHSESALNNDSK	14	728.839	2	Anatase_10x_LA_1_f10498	Anatase	10x	LA	1	0	3.07	2.03	0.475	0.475
sp|Q96T88|UHRF1_HUMAN	APSRDEPCSSTSRPALEEDVIYHVK	25	711.597	4	Anatase_10x_LA_1_f10498	Anatase	10x	LA	1	0	1.64	4.397	0.526	0.526
sp|Q96T88|UHRF1_HUMAN	APSRDEPCSSTSRPALEEDVIYHVK	25	711.597	4	Anatase_10x_LA_1_f10498	Anatase	10x	LA	1	0	1.72	4.247	0.367	0.367
sp|Q96T88|UHRF1_HUMAN	APSRDEPCSSTSRPALEEDVIYHVK	25	948.461	3	Anatase_10x_LA_1_f10498	Anatase	10x	LA	1	0	1.73	2.829	0.413	0.413
##sp|O14513|NCKP5_HUMAN	APSSSSSSSSVQSSPS#ENVGLFSPK	25	840.711	3	Anatase_10x_LA_1_f10498	Anatase	10x	LA	1	1	1.93	1.954	0.146	0.223
sp|Q92804|RBP56_HUMAN	APSYDQPDYGQQDSYDQQSGYDQHQGSYDEQSNYDQQHDSYSQNQQSYHSQR	52	1236.9	5	Anatase_10x_LA_1_f10498	Anatase	10x	LA	1	0	1.46	5.909	0.522	0.522
sp|Q96JC9|EAF1_HUMAN	APTKPPVGPKT#SPLK	15	799.441	2	Anatase_10x_LA_1_f10498	Anatase	10x	LA	1	1	2.37	1.625	0.067	0.293
sp|O15504|NUPL2_HUMAN	APVAPAFGGGSSVAGFGS#PGSHSHTAFSK	29	918.091	3	Anatase_10x_LA_1_f10498	Anatase	10x	LA	1	1	2.55	3.856	0.149	0.613
sp|Q8TAP8|PPR35_HUMAN	APVPEPGLDLSLSPRPDS#PQPR	22	802.403	3	Anatase_10x_LA_1_f10498	Anatase	10x	LA	1	1	3.6	2.103	0.094	0.38
sp|Q13200|PSMD2_HUMAN	APVQPQQS#PAAAPGGTDEK	19	964.943	2	Anatase_10x_LA_1_f10498	Anatase	10x	LA	1	1	2	2.779	0.403	0.452
sp|Q13200|PSMD2_HUMAN	APVQPQQS#PAAAPGGTDEK	19	964.941	2	Anatase_10x_LA_1_f10498	Anatase	10x	LA	1	1	0.2	3.35	0.331	0.354
sp|Q13200|PSMD2_HUMAN	APVQPQQS#PAAAPGGTDEKPSGK	23	1149.54	2	Anatase_10x_LA_1_f10498	Anatase	10x	LA	1	1	2.31	3.345	0.227	0.439
sp|Q13200|PSMD2_HUMAN	APVQPQQS#PAAAPGGTDEKPSGK	23	1149.54	2	Anatase_10x_LA_1_f10498	Anatase	10x	LA	1	1	2.33	3.705	0.215	0.416
sp|Q13200|PSMD2_HUMAN	APVQPQQS#PAAAPGGTDEKPSGK	23	766.699	3	Anatase_10x_LA_1_f10498	Anatase	10x	LA	1	1	2.86	3.503	0.505	0.505
sp|Q13200|PSMD2_HUMAN	APVQPQQSPAAAPGGTDEKPSGK	23	740.043	3	Anatase_10x_LA_1_f10498	Anatase	10x	LA	1	0	2.72	4.061	0.535	0.535
sp|Q9NZN8|CNOT2_HUMAN	APYVGMVTKPANEQSQDFSIHNEDFPALPGSSYKDPTSSNDDSK	44	1193.55	4	Anatase_10x_LA_1_f10498	Anatase	10x	LA	1	0	1.46	4.56	0.382	0.382
sp|Q9NZN8|CNOT2_HUMAN	APYVGMVTKPANEQSQDFSIHNEDFPALPGSSYKDPTSSNDDSK	44	955.041	5	Anatase_10x_LA_1_f10498	Anatase	10x	LA	1	0	0.9	3.768	0.294	0.294
sp|P47914|RL29_HUMAN	AQAAAPASVPAQAPK	15	689.38	2	Anatase_10x_LA_1_f10498	Anatase	10x	LA	1	0	2.37	3.368	0.569	0.569
sp|Q9GZR7|DDX24_HUMAN	AQAVS#EEEEEEEGK	14	822.322	2	Anatase_10x_LA_1_f10498	Anatase	10x	LA	1	1	2.94	3.349	0.638	0.638
sp|P55084|ECHB_HUMAN	AQDEGLLSDVVPFKVPGK	18	633.682	3	Anatase_10x_LA_1_f10498	Anatase	10x	LA	1	0	5.47	2.988	0.419	0.419
sp|O94979|SC31A_HUMAN	AQDGSHPLSLQDLIEK	16	584.305	3	Anatase_10x_LA_1_f10498	Anatase	10x	LA	1	0	2.14	2.021	0.166	0.166
sp|O94979|SC31A_HUMAN	AQDGSHPLSLQDLIEK	16	875.957	2	Anatase_10x_LA_1_f10498	Anatase	10x	LA	1	0	5.25	1.887	0.311	0.311
sp|Q5T200|ZC3HD_HUMAN	AQDIIGHHQSEDRETSDR	18	698.66	3	Anatase_10x_LA_1_f10498	Anatase	10x	LA	1	0	2.49	2.477	0.388	0.388
sp|P38646|GRP75_HUMAN	AQFEGIVTDLIR	12	681.378	2	Anatase_10x_LA_1_f10498	Anatase	10x	LA	1	0	5.1	3.731	0.521	0.521
sp|O94979|SC31A_HUMAN	AQGEPVAGHES#PK	13	693.808	2	Anatase_10x_LA_1_f10498	Anatase	10x	LA	1	1	2.75	2.566	0.566	0.566
sp|O94979|SC31A_HUMAN	AQGEPVAGHES#PKIPYEK	18	672.987	3	Anatase_10x_LA_1_f10498	Anatase	10x	LA	1	1	2.47	1.483	0.187	0.187
sp|O94979|SC31A_HUMAN	AQGEPVAGHESPKIPY#EK	18	1008.98	2	Anatase_10x_LA_1_f10498	Anatase	10x	LA	1	1	1.46	2.102	0.003	0.39
sp|Q6P2H3|CEP85_HUMAN	AQGHDPNLSLLLGIHSAQHPETQLDLQKPDVIK	33	723.39	5	Anatase_10x_LA_1_f10498	Anatase	10x	LA	1	0	2.78	6.15	0.625	0.625
sp|O60343|TBCD4_HUMAN	AQGVRS#PLLR	10	392.881	3	Anatase_10x_LA_1_f10498	Anatase	10x	LA	1	1	1.96	1.442	0.337	0.337
sp|Q8TF50|ZN526_HUMAN	AQHLSATVAEPPVPPPLPPPTPLPPPS#PPSEVK	33	1141.27	3	Anatase_10x_LA_1_f10498	Anatase	10x	LA	1	1	2.29	3.917	0.065	0.492
sp|Q13867|BLMH_HUMAN	AQHVFQHAVPQEGK	14	788.407	2	Anatase_10x_LA_1_f10498	Anatase	10x	LA	1	0	2.9	2.931	0.484	0.484
sp|Q13867|BLMH_HUMAN	AQHVFQHAVPQEGKPITNQK	20	565.053	4	Anatase_10x_LA_1_f10498	Anatase	10x	LA	1	0	2.57	4.147	0.519	0.519
sp|Q13867|BLMH_HUMAN	AQHVFQHAVPQEGKPITNQK	20	452.243	5	Anatase_10x_LA_1_f10498	Anatase	10x	LA	1	0	1.85	2.503	0.339	0.339
sp|Q13867|BLMH_HUMAN	AQHVFQHAVPQEGKPITNQK	20	753.068	3	Anatase_10x_LA_1_f10498	Anatase	10x	LA	1	0	2.72	5.231	0.579	0.579
sp|Q13867|BLMH_HUMAN	AQHVFQHAVPQEGKPITNQK	20	1129.1	2	Anatase_10x_LA_1_f10498	Anatase	10x	LA	1	0	3.65	5.168	0.577	0.577
sp|Q13620|CUL4B_HUMAN	AQIHQFREDSLDSVLFLK	18	716.05	3	Anatase_10x_LA_1_f10498	Anatase	10x	LA	1	0	2.46	3.268	0.303	0.303
sp|Q86UP2|KTN1_HUMAN	AQIQQFHSQIAAQTSASVLAEELHK	25	684.61	4	Anatase_10x_LA_1_f10498	Anatase	10x	LA	1	0	2.65	3.577	0.54	0.54
sp|Q9H2V7|SPNS1_HUMAN	AQLHVQGLLHEAGSTDDRIVVPQR	24	660.607	4	Anatase_10x_LA_1_f10498	Anatase	10x	LA	1	0	2.66	3.624	0.457	0.457
sp|Q9H2V7|SPNS1_HUMAN	AQLHVQGLLHEAGSTDDRIVVPQR	24	528.687	5	Anatase_10x_LA_1_f10498	Anatase	10x	LA	1	0	2.21	2.962	0.472	0.472
sp|Q9H2V7|SPNS1_HUMAN	AQLHVQGLLHEAGSTDDRIVVPQR	24	660.608	4	Anatase_10x_LA_1_f10498	Anatase	10x	LA	1	0	2.74	2.745	0.243	0.243
sp|P09874|PARP1_HUMAN	AQNDLIWNIKDELK	14	567.307	3	Anatase_10x_LA_1_f10498	Anatase	10x	LA	1	0	3.48	2.91	0.328	0.328
sp|P09874|PARP1_HUMAN	AQNDLIWNIKDELKK	15	610.005	3	Anatase_10x_LA_1_f10498	Anatase	10x	LA	1	0	2.75	2.082	0.453	0.453
sp|P09874|PARP1_HUMAN	AQNDLIWNIKDELKK	15	457.756	4	Anatase_10x_LA_1_f10498	Anatase	10x	LA	1	0	2.46	2.539	0.307	0.307
sp|Q8NEN9|PDZD8_HUMAN	AQNEFKDEAQSLS#HSPK	17	665.967	3	Anatase_10x_LA_1_f10498	Anatase	10x	LA	1	1	2.18	2.518	0.021	0.383
sp|O15027|SC16A_HUMAN	AQQELVPPQQQAS#PPQLPK	19	1082.55	2	Anatase_10x_LA_1_f10498	Anatase	10x	LA	1	1	2.41	2.376	0.33	0.33
sp|Q96RU3|FNBP1_HUMAN	AQQHIETCWK	10	434.209	3	Anatase_10x_LA_1_f10498	Anatase	10x	LA	1	0	2.33	1.697	0.213	0.213
sp|Q9Y4W2|LAS1L_HUMAN	AQQQEEQGSVNDVKEEEK	18	692.324	3	Anatase_10x_LA_1_f10498	Anatase	10x	LA	1	0	2.63	3.18	0.323	0.323
sp|Q9Y4W2|LAS1L_HUMAN	AQQQEEQGSVNDVKEEEKEEK	21	821.051	3	Anatase_10x_LA_1_f10498	Anatase	10x	LA	1	0	2.52	4.862	0.565	0.565
sp|Q9Y4W2|LAS1L_HUMAN	AQQQEEQGSVNDVKEEEKEEK	21	616.04	4	Anatase_10x_LA_1_f10498	Anatase	10x	LA	1	0	1.56	3.722	0.457	0.457
sp|O00231|PSD11_HUMAN	AQS#LLSTDREASIDILHSIVK	21	792.747	3	Anatase_10x_LA_1_f10498	Anatase	10x	LA	1	1	3.64	2.185	0.3	0.3
sp|Q15276|RABE1_HUMAN	AQS#TDSLGT#SGSLQSK	16	863.851	2	Anatase_10x_LA_1_f10498	Anatase	10x	LA	1	1	1.03	2.377	0.058	0.301
sp|Q8TCG1|CIP2A_HUMAN	AQSDIEHLFQHNR	13	532.263	3	Anatase_10x_LA_1_f10498	Anatase	10x	LA	1	0	2.09	2.421	0.453	0.453
sp|Q7Z7A4|PXK_HUMAN	AQSHHGSEEER	11	633.779	2	Anatase_10x_LA_1_f10498	Anatase	10x	LA	1	0	3.65	1.186	0.277	0.277
sp|O00231|PSD11_HUMAN	AQSLLSTDREASIDILHSIVK	21	766.091	3	Anatase_10x_LA_1_f10498	Anatase	10x	LA	1	0	3.27	5.535	0.638	0.638
sp|P46013|KI67_HUMAN	AQSLVISPPAPS#PR	14	750.388	2	Anatase_10x_LA_1_f10498	Anatase	10x	LA	1	1	4.25	1.957	0.38	0.427
sp|P46013|KI67_HUMAN	AQSLVISPPAPS#PRK	15	543.292	3	Anatase_10x_LA_1_f10498	Anatase	10x	LA	1	1	2.21	2.295	0.243	0.365
sp|P56524|HDAC4_HUMAN	AQSS#PASATFPVSVQEPPTK	20	1055	2	Anatase_10x_LA_1_f10498	Anatase	10x	LA	1	1	2.53	2.11	0.007	0.203
sp|P56524|HDAC4_HUMAN	AQSS#PASATFPVSVQEPPTKPR	22	1181.58	2	Anatase_10x_LA_1_f10498	Anatase	10x	LA	1	1	2.69	1.636	0.007	0.237
sp|Q76I76|SSH2_HUMAN	AQT#PENKPGHMEQDEDSCTAQPELAK	26	997.757	3	Anatase_10x_LA_1_f10498	Anatase	10x	LA	1	1	1.89	3.792	0.467	0.467
sp|Q9UQ35|SRRM2_HUMAN	AQT#PPGPSLSGSK	13	653.807	2	Anatase_10x_LA_1_f10498	Anatase	10x	LA	1	1	2.46	2.312	0.342	0.342
sp|Q9UQ35|SRRM2_HUMAN	AQT#PPGPSLSGSKS#PCPQEK	20	738.318	3	Anatase_10x_LA_1_f10498	Anatase	10x	LA	1	1	2.48	2.106	0.253	0.428
sp|Q01082|SPTB2_HUMAN	AQTLPTSVVTITSESS#PGK	19	991.99	2	Anatase_10x_LA_1_f10498	Anatase	10x	LA	1	1	2.66	3.256	0.032	0.524
sp|Q9UQ35|SRRM2_HUMAN	AQTPPGPSLSGSKS#PCPQEK	20	1066.99	2	Anatase_10x_LA_1_f10498	Anatase	10x	LA	1	1	1.89	3.132	0.004	0.413
sp|Q9HCE0|EPG5_HUMAN	AQTQLKLPIVPSLQRLLIYR	20	784.152	3	Anatase_10x_LA_1_f10498	Anatase	10x	LA	1	0	3.38	1.085	0.281	0.281
sp|Q86WR7|PRSR2_HUMAN	AQVLATIHGHAGAFPAAGDAGEGAPGGGS#SPER	33	1031.81	3	Anatase_10x_LA_1_f10498	Anatase	10x	LA	1	1	2.87	4.364	0.075	0.494
sp|Q86WR7|PRSR2_HUMAN	AQVLATIHGHAGAFPAAGDAGEGAPGGGS#SPER	33	1031.81	3	Anatase_10x_LA_1_f10498	Anatase	10x	LA	1	1	2.14	4.612	0.043	0.515
##sp|Q96PV4|PNMA5_HUMAN	AQVT#AQPASVSAEAR	15	783.371	2	Anatase_10x_LA_1_f10498	Anatase	10x	LA	1	1	2.32	1.958	0.041	0.178
sp|P18074|ERCC2_HUMAN	AQYQHDTSLPHCR	13	538.249	3	Anatase_10x_LA_1_f10498	Anatase	10x	LA	1	0	1.96	3.119	0.49	0.49
sp|O15014|ZN609_HUMAN	ARAS#PSVTCK	10	578.764	2	Anatase_10x_LA_1_f10498	Anatase	10x	LA	1	1	2.69	1.687	0.056	0.284
sp|P36543|VATE1_HUMAN	ARDDLITDLLNEAK	14	793.929	2	Anatase_10x_LA_1_f10498	Anatase	10x	LA	1	0	7.97	3.937	0.484	0.484
sp|P36543|VATE1_HUMAN	ARDDLITDLLNEAK	14	529.621	3	Anatase_10x_LA_1_f10498	Anatase	10x	LA	1	0	6.18	4.51	0.366	0.366
sp|Q9Y676|RT18B_HUMAN	ARDHGLLIYHIPQVEPR	17	504.281	4	Anatase_10x_LA_1_f10498	Anatase	10x	LA	1	0	1.83	3.938	0.599	0.599
sp|Q9Y676|RT18B_HUMAN	ARDHGLLIYHIPQVEPR	17	672.04	3	Anatase_10x_LA_1_f10498	Anatase	10x	LA	1	0	3.2	3.58	0.486	0.486
sp|P11802|CDK4_HUMAN	ARDPHSGHFVALK	13	717.886	2	Anatase_10x_LA_1_f10498	Anatase	10x	LA	1	0	2.74	2.567	0.336	0.336
sp|P11802|CDK4_HUMAN	ARDPHSGHFVALK	13	478.926	3	Anatase_10x_LA_1_f10498	Anatase	10x	LA	1	0	2.08	2.309	0.43	0.43
sp|P11802|CDK4_HUMAN	ARDPHSGHFVALK	13	717.886	2	Anatase_10x_LA_1_f10498	Anatase	10x	LA	1	0	2.74	2.302	0.278	0.278
sp|Q15361|TTF1_HUMAN	ARDTLPQSESHQEESWLSVGPGGEITELPASAHK	34	911.699	4	Anatase_10x_LA_1_f10498	Anatase	10x	LA	1	0	3.43	5.237	0.327	0.327
sp|Q15361|TTF1_HUMAN	ARDTLPQSESHQEESWLSVGPGGEITELPASAHK	34	911.699	4	Anatase_10x_LA_1_f10498	Anatase	10x	LA	1	0	3.27	5.707	0.427	0.427
sp|Q15361|TTF1_HUMAN	ARDTLPQSESHQEESWLSVGPGGEITELPASAHK	34	729.56	5	Anatase_10x_LA_1_f10498	Anatase	10x	LA	1	0	3.01	3.657	0.372	0.372
sp|Q9NWA0|MED9_HUMAN	AREEENYSFLPLVHNIIK	18	543.793	4	Anatase_10x_LA_1_f10498	Anatase	10x	LA	1	0	3.33	1.862	0.259	0.259
sp|Q96FX7|TRM61_HUMAN	AREEFQEHR	9	401.196	3	Anatase_10x_LA_1_f10498	Anatase	10x	LA	1	0	1.78	3.167	0.089	0.089
sp|Q96FX7|TRM61_HUMAN	AREEFQEHR	9	601.291	2	Anatase_10x_LA_1_f10498	Anatase	10x	LA	1	0	2.75	2.898	0.131	0.131
sp|Q96HY6|DDRGK_HUMAN	AREEQAQREHEEYLK	15	639.315	3	Anatase_10x_LA_1_f10498	Anatase	10x	LA	1	0	2.92	3.121	0.181	0.181
sp|Q96HY6|DDRGK_HUMAN	AREEQAQREHEEYLK	15	958.469	2	Anatase_10x_LA_1_f10498	Anatase	10x	LA	1	0	2.13	1.864	0.285	0.285
sp|Q96HY6|DDRGK_HUMAN	AREEQAQREHEEYLK	15	958.469	2	Anatase_10x_LA_1_f10498	Anatase	10x	LA	1	0	2.13	2.064	0.469	0.469
sp|Q9UJU2|LEF1_HUMAN	AREHPDDGKHPDGGLYNK	18	669.322	3	Anatase_10x_LA_1_f10498	Anatase	10x	LA	1	0	2.49	3.099	0.427	0.427
sp|Q9UJU2|LEF1_HUMAN	AREHPDDGKHPDGGLYNK	18	1003.48	2	Anatase_10x_LA_1_f10498	Anatase	10x	LA	1	0	2.34	2.386	0.468	0.468
sp|Q9UJU2|LEF1_HUMAN	AREHPDDGKHPDGGLYNK	18	502.243	4	Anatase_10x_LA_1_f10498	Anatase	10x	LA	1	0	1.72	3.14	0.394	0.394
sp|Q6IA69|NADE_HUMAN	ARELAQQIGSHHISLNIDPAVK	22	600.082	4	Anatase_10x_LA_1_f10498	Anatase	10x	LA	1	0	1.98	3.261	0.287	0.287
sp|P54652|HSP72_HUMAN	ARFEELNADLFR	12	494.258	3	Anatase_10x_LA_1_f10498	Anatase	10x	LA	1	0	2.55	4.347	0.3	0.3
sp|P54652|HSP72_HUMAN	ARFEELNADLFR	12	740.883	2	Anatase_10x_LA_1_f10498	Anatase	10x	LA	1	0	3.4	2.832	0.388	0.388
sp|Q7Z3T8|ZFY16_HUMAN	ARGDFLPQHEHK	12	717.867	2	Anatase_10x_LA_1_f10498	Anatase	10x	LA	1	0	2.5	2.51	0.181	0.181
sp|Q7Z4V5|HDGR2_HUMAN	ARGDS#EALDEES	12	679.761	2	Anatase_10x_LA_1_f10498	Anatase	10x	LA	1	1	2.65	1.906	0.235	0.235
sp|Q9NZM4|GSCR1_HUMAN	ARGGS#PAPLPAK	12	601.31	2	Anatase_10x_LA_1_f10498	Anatase	10x	LA	1	1	2.95	2.191	0.297	0.297
sp|Q14157|UBP2L_HUMAN	ARGNWEQPQNQNQTQHK	17	688.665	3	Anatase_10x_LA_1_f10498	Anatase	10x	LA	1	0	2.53	3.388	0.386	0.386
sp|Q14204|DYHC1_HUMAN	ARGTFDNAETKK	12	446.566	3	Anatase_10x_LA_1_f10498	Anatase	10x	LA	1	0	1.94	3.754	0.27	0.27
sp|Q4G0A6|F188B_HUMAN	ARHDNLDGDVLGNFVSSK	18	648.659	3	Anatase_10x_LA_1_f10498	Anatase	10x	LA	1	0	3.46	3.506	0.415	0.415
sp|Q9BRD0|BUD13_HUMAN	ARHDS#PDLAPNVTYSLPR	18	697.002	3	Anatase_10x_LA_1_f10498	Anatase	10x	LA	1	1	3.09	4.287	0.51	0.51
sp|Q00341|VIGLN_HUMAN	ARHEVLLISAEQDK	14	804.941	2	Anatase_10x_LA_1_f10498	Anatase	10x	LA	1	0	2.69	4.219	0.571	0.571
sp|P12268|IMDH2_HUMAN	ARHGFCGIPITDTGR	15	553.28	3	Anatase_10x_LA_1_f10498	Anatase	10x	LA	1	0	2.26	2.967	0.418	0.418
sp|Q00688|FKBP3_HUMAN	ARLEIEPEWAYGKK	14	563.971	3	Anatase_10x_LA_1_f10498	Anatase	10x	LA	1	0	2.04	3.612	0.431	0.431
sp|Q5SW79|CE170_HUMAN	ARLGEAS#DSELADADK	16	864.379	2	Anatase_10x_LA_1_f10498	Anatase	10x	LA	1	1	1.77	2.235	0.095	0.272
sp|Q5SW79|CE170_HUMAN	ARLGEAS#DSELADADK	16	864.379	2	Anatase_10x_LA_1_f10498	Anatase	10x	LA	1	1	1.78	2.205	0.019	0.312
sp|Q96HE9|PRR11_HUMAN	ARNPLVTVSDLQHVTLKPNSK	21	580.082	4	Anatase_10x_LA_1_f10498	Anatase	10x	LA	1	0	2.42	2.336	0.251	0.251
sp|P13639|EF2_HUMAN	ARPFPDGLAEDIDK	14	515.265	3	Anatase_10x_LA_1_f10498	Anatase	10x	LA	1	0	2.57	2.757	0.268	0.268
sp|P13639|EF2_HUMAN	ARPFPDGLAEDIDKGEVSAR	20	715.033	3	Anatase_10x_LA_1_f10498	Anatase	10x	LA	1	0	2.51	4.477	0.519	0.519
sp|P13639|EF2_HUMAN	ARPFPDGLAEDIDKGEVSAR	20	536.526	4	Anatase_10x_LA_1_f10498	Anatase	10x	LA	1	0	2.4	4.375	0.479	0.479
sp|P13639|EF2_HUMAN	ARPFPDGLAEDIDKGEVSAR	20	536.526	4	Anatase_10x_LA_1_f10498	Anatase	10x	LA	1	0	2.3	3.674	0.429	0.429
sp|P13639|EF2_HUMAN	ARPFPDGLAEDIDKGEVSAR	20	715.032	3	Anatase_10x_LA_1_f10498	Anatase	10x	LA	1	0	2.21	6.382	0.628	0.628
sp|P13639|EF2_HUMAN	ARPFPDGLAEDIDKGEVSAR	20	536.526	4	Anatase_10x_LA_1_f10498	Anatase	10x	LA	1	0	2.15	4.008	0.48	0.48
sp|P13639|EF2_HUMAN	ARPFPDGLAEDIDKGEVSAR	20	715.033	3	Anatase_10x_LA_1_f10498	Anatase	10x	LA	1	0	2.5	5.269	0.581	0.581
sp|Q5JTC6|AMER1_HUMAN	ARPHEHVSSAPQVPCFEETFQAPR	24	695.088	4	Anatase_10x_LA_1_f10498	Anatase	10x	LA	1	0	2.92	3.949	0.529	0.529
sp|Q3KQU3|MA7D1_HUMAN	ARPSSPSTS#WHRPAS#PCPSPGPGHTLPPKPPS#PR	34	955.932	4	Anatase_10x_LA_1_f10498	Anatase	10x	LA	1	1	2.6	3.046	0.018	0.208
sp|Q6JBY9|CPZIP_HUMAN	ARRSS#EEVDGQHPAQEEVPESPQTSGPEAENR	32	896.647	4	Anatase_10x_LA_1_f10498	Anatase	10x	LA	1	1	-0.71	3.559	0.024	0.329
sp|Q5QP82|DCA10_HUMAN	ARRTTSS#SDLTT#SSS#SSGPRVSGSPCHHSDSNSSEK	36	1326.2	3	Anatase_10x_LA_1_f10498	Anatase	10x	LA	1	1	4.98	1.958	0.017	0.625
sp|Q86YD1|PTOV1_HUMAN	ARS#APPMEGAR	11	611.775	2	Anatase_10x_LA_1_f10498	Anatase	10x	LA	1	1	2.11	2.43	0.549	0.549
sp|Q9Y2X7|GIT1_HUMAN	ARS#M*DSSDLSDGAVTLQEYLELKK	24	918.099	3	Anatase_10x_LA_1_f10498	Anatase	10x	LA	1	1	3.18	4.321	0.018	0.478
sp|Q9Y2X7|GIT1_HUMAN	ARS#MDSSDLSDGAVTLQEYLELKK	24	912.774	3	Anatase_10x_LA_1_f10498	Anatase	10x	LA	1	1	9.7	4.197	0.095	0.468
sp|Q9UQ35|SRRM2_HUMAN	ARS#RT#PPSAPSQSR	14	553.247	3	Anatase_10x_LA_1_f10498	Anatase	10x	LA	1	1	2.58	1.843	0.209	0.209
sp|Q13247|SRSF6_HUMAN	ARS#VS#PPPK	9	549.742	2	Anatase_10x_LA_1_f10498	Anatase	10x	LA	1	1	2.18	1.94	0.45	0.45
sp|P49840|GSK3A_HUMAN	ARTSS#FAEPGGGGGGGGGGPGGSASGPGGTGGGK	34	914.065	3	Anatase_10x_LA_1_f10498	Anatase	10x	LA	1	1	3.4	5.606	0.011	0.656
sp|P08670|VIME_HUMAN	ARVEVERDNLAEDIMR	16	639.328	3	Anatase_10x_LA_1_f10498	Anatase	10x	LA	1	0	2.61	3.166	0.494	0.494
sp|P08670|VIME_HUMAN	ARVEVERDNLAEDIMR	16	479.748	4	Anatase_10x_LA_1_f10498	Anatase	10x	LA	1	0	1.93	3.083	0.299	0.299
sp|Q9NQ55|SSF1_HUMAN	ARVGGS#DEEASGIPSR	16	556.586	3	Anatase_10x_LA_1_f10498	Anatase	10x	LA	1	1	2.27	3.393	0.344	0.344
sp|Q8NCM8|DYHC2_HUMAN	ARWDQLKPGDDVIETGQHNTLDK	23	659.833	4	Anatase_10x_LA_1_f10498	Anatase	10x	LA	1	0	1.84	2.999	0.321	0.321
sp|P56211|ARP19_HUMAN	ARYPHLGQK	9	535.3	2	Anatase_10x_LA_1_f10498	Anatase	10x	LA	1	0	2.38	1.704	0.214	0.214
sp|P56211|ARP19_HUMAN	ARYPHLGQKPGGSDFLR	17	475.506	4	Anatase_10x_LA_1_f10498	Anatase	10x	LA	1	0	1.12	3.629	0.364	0.364
sp|P56211|ARP19_HUMAN	ARYPHLGQKPGGSDFLRK	18	406.225	5	Anatase_10x_LA_1_f10498	Anatase	10x	LA	1	0	1.55	3.15	0.362	0.362
##sp|Q9NRW4|DUS22_HUMAN	AS#DHVS#LIHTVKNK	14	854.896	2	Anatase_10x_LA_1_f10498	Anatase	10x	LA	1	1	1.84	1.903	0.107	0.15
sp|Q14202|ZMYM3_HUMAN	AS#EKPPERK	9	561.274	2	Anatase_10x_LA_1_f10498	Anatase	10x	LA	1	1	4.83	1.851	0.228	0.228
sp|Q8NDT2|RB15B_HUMAN	AS#GDPGAS#GMSPRASPLPPPPPPPGAEPACPGSSAAAPEYK	41	1347.6	3	Anatase_10x_LA_1_f10498	Anatase	10x	LA	1	1	2.7	4.123	0.021	0.543
sp|Q8NDT2|RB15B_HUMAN	AS#GDPGASGMSPRAS#PLPPPPPPPGAEPACPGSSAAAPEYK	41	1347.59	3	Anatase_10x_LA_1_f10498	Anatase	10x	LA	1	1	2.4	3.364	0.008	0.287
sp|Q8IU81|I2BP1_HUMAN	AS#PEPEGEAAGK	12	611.754	2	Anatase_10x_LA_1_f10498	Anatase	10x	LA	1	1	2.13	2.077	0.398	0.398
sp|Q96G74|OTUD5_HUMAN	AS#PPPQGPLPGPPGALHR	18	609.31	3	Anatase_10x_LA_1_f10498	Anatase	10x	LA	1	1	2.08	1.979	0.454	0.454
sp|Q9NPI6|DCP1A_HUMAN	AS#S#PSPLTIGTPESQR	16	894.385	2	Anatase_10x_LA_1_f10498	Anatase	10x	LA	1	1	1.23	2.11	0.051	0.277
sp|Q9NPI6|DCP1A_HUMAN	AS#SPSPLTIGTPESQR	16	854.403	2	Anatase_10x_LA_1_f10498	Anatase	10x	LA	1	1	2.47	2.768	0.027	0.497
sp|Q96T58|MINT_HUMAN	AS#TPQPAPAGVPALASQHPPEEEVHYHLPVAR	32	859.175	4	Anatase_10x_LA_1_f10498	Anatase	10x	LA	1	1	2.63	3.241	0.011	0.406
sp|P52732|KIF11_HUMAN	ASAHSIVECDPVRK	14	784.898	2	Anatase_10x_LA_1_f10498	Anatase	10x	LA	1	0	2.33	2.782	0.407	0.407
sp|P52732|KIF11_HUMAN	ASAHSIVECDPVRK	14	523.601	3	Anatase_10x_LA_1_f10498	Anatase	10x	LA	1	0	1.84	2.837	0.502	0.502
sp|Q641Q2|FA21A_HUMAN	ASALLFS#SDEEDQWNIPASQTHLASDSR	28	1052.48	3	Anatase_10x_LA_1_f10498	Anatase	10x	LA	1	1	4.98	3.895	0.042	0.407
sp|Q14258|TRI25_HUMAN	ASAPS#PNAQVACDHCLK	17	953.405	2	Anatase_10x_LA_1_f10498	Anatase	10x	LA	1	1	1.97	2.202	0.091	0.485
sp|P11274|BCR_HUMAN	ASASRPQPAPADGADPPPAEEPEARPDGEGS#PGK	34	1130.18	3	Anatase_10x_LA_1_f10498	Anatase	10x	LA	1	1	1.81	3.059	0.342	0.342
sp|P11274|BCR_HUMAN	ASASRPQPAPADGADPPPAEEPEARPDGEGS#PGK	34	847.884	4	Anatase_10x_LA_1_f10498	Anatase	10x	LA	1	1	2.16	3.352	0.315	0.315
sp|Q96G74|OTUD5_HUMAN	ASATCSSATAAASSGLEEWTSRS#PR	25	874.383	3	Anatase_10x_LA_1_f10498	Anatase	10x	LA	1	1	2.2	2.969	0.012	0.439
sp|Q9Y2W1|TR150_HUMAN	ASAVSELS#PR	10	548.756	2	Anatase_10x_LA_1_f10498	Anatase	10x	LA	1	1	1.98	2.338	0.336	0.361
sp|Q9Y2W1|TR150_HUMAN	ASAVSELS#PRERS#PALKS#PLQSVVVR	26	1001.82	3	Anatase_10x_LA_1_f10498	Anatase	10x	LA	1	1	1.64	3.039	0.102	0.419
sp|Q6PJG6|BRAT1_HUMAN	ASAVTAMGQLSSQGLHAPTS#PEHAEAR	27	928.766	3	Anatase_10x_LA_1_f10498	Anatase	10x	LA	1	1	2.5	4.38	0.058	0.593
sp|Q9ULV3|CIZ1_HUMAN	ASCSSQQEFQDHMSEPQHQQR	21	849.026	3	Anatase_10x_LA_1_f10498	Anatase	10x	LA	1	0	2.28	2.97	0.283	0.283
sp|O94782|UBP1_HUMAN	ASEIDQVVPAAQS#SPINCEK	20	1112.01	2	Anatase_10x_LA_1_f10498	Anatase	10x	LA	1	1	2.73	2.113	0.124	0.316
sp|Q8N6T3|ARFG1_HUMAN	ASELGHSLNENVLKPAQEK	19	688.697	3	Anatase_10x_LA_1_f10498	Anatase	10x	LA	1	0	2.52	5.707	0.363	0.363
sp|P18583|SON_HUMAN	ASESS#SEEKDDYEIFVK	17	1021.93	2	Anatase_10x_LA_1_f10498	Anatase	10x	LA	1	1	2.05	2.327	0.005	0.256
sp|P12814|ACTN1_HUMAN	ASFNHFDRDHSGTLGPEEFK	20	764.356	3	Anatase_10x_LA_1_f10498	Anatase	10x	LA	1	0	1.96	4.007	0.462	0.462
sp|P12814|ACTN1_HUMAN	ASFNHFDRDHSGTLGPEEFK	20	573.519	4	Anatase_10x_LA_1_f10498	Anatase	10x	LA	1	0	2.09	3.448	0.445	0.445
sp|Q8NDT2|RB15B_HUMAN	ASGDPGASGMS#PRAS#PLPPPPPPPGAEPACPGSSAAAPEYK	41	1347.59	3	Anatase_10x_LA_1_f10498	Anatase	10x	LA	1	1	2.68	3.023	0.086	0.31
sp|Q92922|SMRC1_HUMAN	ASGKVDPTYGLESSCIAGTGPDEPEKLEGAEEEK	34	1184.22	3	Anatase_10x_LA_1_f10498	Anatase	10x	LA	1	0	2.16	3.502	0.313	0.313
sp|Q92922|SMRC1_HUMAN	ASGKVDPTYGLESSCIAGTGPDEPEKLEGAEEEKMEADPDGQQPEK	46	976.047	5	Anatase_10x_LA_1_f10498	Anatase	10x	LA	1	0	2.22	3.602	0.368	0.368
sp|P62917|RL8_HUMAN	ASGNYATVISHNPETK	16	844.918	2	Anatase_10x_LA_1_f10498	Anatase	10x	LA	1	0	2.8	3.006	0.428	0.428
sp|P62917|RL8_HUMAN	ASGNYATVISHNPETKK	17	908.965	2	Anatase_10x_LA_1_f10498	Anatase	10x	LA	1	0	2.49	4.092	0.631	0.631
sp|P62917|RL8_HUMAN	ASGNYATVISHNPETKK	17	454.986	4	Anatase_10x_LA_1_f10498	Anatase	10x	LA	1	0	1.96	2.714	0.399	0.399
sp|P16403|H12_HUMAN	ASGPPVSELITK	12	599.839	2	Anatase_10x_LA_1_f10498	Anatase	10x	LA	1	0	2.32	2.627	0.509	0.509
sp|P16949|STMN1_HUMAN	ASGQAFELILS#PR	13	734.866	2	Anatase_10x_LA_1_f10498	Anatase	10x	LA	1	1	3.7	1.895	0.329	0.329
sp|Q92922|SMRC1_HUMAN	ASHHIYPYSSSQDDEEWLRPVM*R	23	705.578	4	Anatase_10x_LA_1_f10498	Anatase	10x	LA	1	0	2.25	3.569	0.395	0.395
sp|Q92922|SMRC1_HUMAN	ASHHIYPYSSSQDDEEWLRPVM*R	23	940.435	3	Anatase_10x_LA_1_f10498	Anatase	10x	LA	1	0	2.22	3.834	0.508	0.508
sp|Q92922|SMRC1_HUMAN	ASHHIYPYSSSQDDEEWLRPVM*R	23	564.664	5	Anatase_10x_LA_1_f10498	Anatase	10x	LA	1	0	2.07	3.026	0.289	0.289
sp|Q92922|SMRC1_HUMAN	ASHHIYPYSSSQDDEEWLRPVMR	23	701.579	4	Anatase_10x_LA_1_f10498	Anatase	10x	LA	1	0	2.31	3.627	0.423	0.423
sp|Q92922|SMRC1_HUMAN	ASHHIYPYSSSQDDEEWLRPVMR	23	935.104	3	Anatase_10x_LA_1_f10498	Anatase	10x	LA	1	0	2.9	2.633	0.383	0.383
sp|Q9NQX3|GEPH_HUMAN	ASHS#AVDITK	10	554.756	2	Anatase_10x_LA_1_f10498	Anatase	10x	LA	1	1	2	1.723	0.188	0.369
sp|O15144|ARPC2_HUMAN	ASHTAPQVLFSHREPPLELK	20	565.058	4	Anatase_10x_LA_1_f10498	Anatase	10x	LA	1	0	1.27	3.179	0.496	0.496
sp|O15144|ARPC2_HUMAN	ASHTAPQVLFSHREPPLELK	20	565.059	4	Anatase_10x_LA_1_f10498	Anatase	10x	LA	1	0	1.56	4.105	0.469	0.469
sp|O15144|ARPC2_HUMAN	ASHTAPQVLFSHREPPLELK	20	753.076	3	Anatase_10x_LA_1_f10498	Anatase	10x	LA	1	0	2.68	2.84	0.466	0.466
sp|Q9UQ88|CD11A_HUMAN	ASHWS#RSPPRPPR	13	403.449	4	Anatase_10x_LA_1_f10498	Anatase	10x	LA	1	1	1.55	1.824	0.012	0.358
sp|Q9UQ88|CD11A_HUMAN	ASHWSRS#PPRPPR	13	537.596	3	Anatase_10x_LA_1_f10498	Anatase	10x	LA	1	1	2.16	1.194	0.043	0.434
sp|Q9NXE4|NSMA3_HUMAN	ASIQECILPDS#PLYHNK	17	1032.98	2	Anatase_10x_LA_1_f10498	Anatase	10x	LA	1	1	3.81	2.142	0.308	0.308
sp|Q9UHV7|MED13_HUMAN	ASLHLHVPSVQSDELLHSK	19	525.034	4	Anatase_10x_LA_1_f10498	Anatase	10x	LA	1	0	1.86	3.283	0.469	0.469
sp|Q14687|GSE1_HUMAN	ASLPQAATFGELSGPLKPGS#PYRPPVPR	28	990.849	3	Anatase_10x_LA_1_f10498	Anatase	10x	LA	1	1	2.73	3.454	0.021	0.485
sp|Q9UKV3|ACINU_HUMAN	ASLVALPEQTAS#EEETPPPLLTK	23	1251.13	2	Anatase_10x_LA_1_f10498	Anatase	10x	LA	1	1	2.84	2.316	0.049	0.324
sp|Q15022|SUZ12_HUMAN	ASMSEFLES#EDGEVEQQR	18	1075.93	2	Anatase_10x_LA_1_f10498	Anatase	10x	LA	1	1	1.89	2.56	0.36	0.451
sp|Q8TEM1|PO210_HUMAN	ASPGHSPHYFAASSPTSPNALPPARK	26	662.088	4	Anatase_10x_LA_1_f10498	Anatase	10x	LA	1	0	2.63	2.879	0.395	0.395
sp|Q02880|TOP2B_HUMAN	ASPITNDGEDEFVPS#DGLDKDEYTFSPGK	29	1070.8	3	Anatase_10x_LA_1_f10498	Anatase	10x	LA	1	1	2.63	3.161	0.362	0.362
sp|Q02880|TOP2B_HUMAN	ASPITNDGEDEFVPSDGLDKDEY#TFS#PGK	29	1097.45	3	Anatase_10x_LA_1_f10498	Anatase	10x	LA	1	1	2.01	2.239	0.042	0.238
sp|Q02880|TOP2B_HUMAN	ASPITNDGEDEFVPSDGLDKDEYTFS#PGK	29	1070.8	3	Anatase_10x_LA_1_f10498	Anatase	10x	LA	1	1	2.39	2.195	0.151	0.212
sp|Q9HC35|EMAL4_HUMAN	ASPS#PQPSSQPLQIHR	16	905.437	2	Anatase_10x_LA_1_f10498	Anatase	10x	LA	1	1	1.83	2.619	0.096	0.283
sp|Q9HC35|EMAL4_HUMAN	ASPS#PQPSSQPLQIHR	16	905.438	2	Anatase_10x_LA_1_f10498	Anatase	10x	LA	1	1	2.31	2.204	0.03	0.269
sp|Q8N5I9|CL045_HUMAN	ASPSCS#SPTRDSSGVPVSK	19	662.628	3	Anatase_10x_LA_1_f10498	Anatase	10x	LA	1	1	2.89	1.383	0	0.286
sp|Q8N5I9|CL045_HUMAN	ASPSCSS#PTRDSSGVPVSK	19	993.438	2	Anatase_10x_LA_1_f10498	Anatase	10x	LA	1	1	2.61	2.706	0.011	0.352
sp|Q96CP2|FWCH2_HUMAN	ASQEPS#PKPGTEVIPAAPR	19	671.335	3	Anatase_10x_LA_1_f10498	Anatase	10x	LA	1	1	2.48	2.504	0.035	0.214
sp|Q96CP2|FWCH2_HUMAN	ASQEPS#PKPGTEVIPAAPR	19	1006.5	2	Anatase_10x_LA_1_f10498	Anatase	10x	LA	1	1	2.62	2.315	0.143	0.472
sp|O60763|USO1_HUMAN	ASQKPQPNFPSPEYMIFDHEFTK	23	685.332	4	Anatase_10x_LA_1_f10498	Anatase	10x	LA	1	0	4.78	2.559	0.332	0.332
sp|O94804|STK10_HUMAN	ASQS#RPNSS#ALETLGGEK	18	996.43	2	Anatase_10x_LA_1_f10498	Anatase	10x	LA	1	1	2.37	1.99	0.015	0.174
sp|O94804|STK10_HUMAN	ASQSRPNS#SALETLGGEK	18	956.447	2	Anatase_10x_LA_1_f10498	Anatase	10x	LA	1	1	2.65	2.69	0.102	0.392
sp|O94804|STK10_HUMAN	ASQSRPNS#SALETLGGEK	18	956.446	2	Anatase_10x_LA_1_f10498	Anatase	10x	LA	1	1	2.39	3.317	0.164	0.386
sp|Q9C0C2|TB182_HUMAN	ASRVPS#S#DEEVVEEPQSR	18	1080.95	2	Anatase_10x_LA_1_f10498	Anatase	10x	LA	1	1	2.19	2.691	0.29	0.541
sp|Q15477|SKIV2_HUMAN	ASS#LEDLVLK	10	577.79	2	Anatase_10x_LA_1_f10498	Anatase	10x	LA	1	1	2.5	2.291	0.134	0.515
sp|Q9NWB6|ARGL1_HUMAN	ASS#PPDRIDIFGR	13	504.241	3	Anatase_10x_LA_1_f10498	Anatase	10x	LA	1	1	2.56	1.311	0.223	0.285
sp|Q9NPI6|DCP1A_HUMAN	ASS#PSPLTIGTPESQRK	17	918.451	2	Anatase_10x_LA_1_f10498	Anatase	10x	LA	1	1	2.24	1.725	0.012	0.197
sp|Q9BRD0|BUD13_HUMAN	ASSKTS#PHWK	10	403.521	3	Anatase_10x_LA_1_f10498	Anatase	10x	LA	1	1	1.68	1.636	0.041	0.22
sp|Q9UGU5|HMGX4_HUMAN	ASSVGVLSPQKKS#PPTTMLLPAS#PAK	26	918.133	3	Anatase_10x_LA_1_f10498	Anatase	10x	LA	1	1	3.45	3.138	0.128	0.42
sp|Q71RC2|LARP4_HUMAN	AST#ASPCNNNINAATAVALQEPR	23	817.378	3	Anatase_10x_LA_1_f10498	Anatase	10x	LA	1	1	2.86	2.964	0.005	0.286
sp|Q96T58|MINT_HUMAN	AST#PQPAPAGVPALASQHPPEEEVHYHLPVAR	32	859.175	4	Anatase_10x_LA_1_f10498	Anatase	10x	LA	1	1	3.01	3.292	0.009	0.404
sp|Q71RC2|LARP4_HUMAN	ASTAS#PCNNNINAATAVALQEPR	23	1225.56	2	Anatase_10x_LA_1_f10498	Anatase	10x	LA	1	1	3.14	4.039	0.003	0.533
sp|Q99653|CHP1_HUMAN	ASTLLRDEELEEIKK	15	591.992	3	Anatase_10x_LA_1_f10498	Anatase	10x	LA	1	0	1.84	3.708	0.355	0.355
sp|O75832|PSD10_HUMAN	ASTNIQDTEGNTPLHLACDEERVEEAK	27	1009.8	3	Anatase_10x_LA_1_f10498	Anatase	10x	LA	1	0	1.09	3.508	0.435	0.435
sp|O75832|PSD10_HUMAN	ASTNIQDTEGNTPLHLACDEERVEEAK	27	757.606	4	Anatase_10x_LA_1_f10498	Anatase	10x	LA	1	0	2.61	2.896	0.201	0.201
sp|Q8NFH5|NUP53_HUMAN	ASTSDYQVISDRQT#PKKDESLVSK	24	921.448	3	Anatase_10x_LA_1_f10498	Anatase	10x	LA	1	1	1.9	3.046	0.049	0.346
sp|Q96G03|PGM2_HUMAN	ASYFICHDQETIKK	14	580.62	3	Anatase_10x_LA_1_f10498	Anatase	10x	LA	1	0	2.23	2.754	0.443	0.443
sp|P53041|PPP5_HUMAN	ASYIHLQGSDLRPQFHQFTAVPHPNVK	27	618.326	5	Anatase_10x_LA_1_f10498	Anatase	10x	LA	1	0	2.69	3.224	0.476	0.476
sp|P53041|PPP5_HUMAN	ASYIHLQGSDLRPQFHQFTAVPHPNVK	27	772.656	4	Anatase_10x_LA_1_f10498	Anatase	10x	LA	1	0	3.22	3.757	0.5	0.5
sp|Q5SYE7|NHSL1_HUMAN	AT#M*PQVPGGSVK	12	634.293	2	Anatase_10x_LA_1_f10498	Anatase	10x	LA	1	1	3.4	1.516	0.31	0.31
sp|P51659|DHB4_HUMAN	AT#STATSGFAGAIGQK	16	774.36	2	Anatase_10x_LA_1_f10498	Anatase	10x	LA	1	1	2.18	2.572	0.039	0.373
sp|P0DMV8|HS71A_HUMAN	ATAGDTHLGGEDFDNR	16	838.37	2	Anatase_10x_LA_1_f10498	Anatase	10x	LA	1	0	0.72	2.083	0.304	0.304
sp|P0DMV8|HS71A_HUMAN	ATAGDTHLGGEDFDNR	16	559.249	3	Anatase_10x_LA_1_f10498	Anatase	10x	LA	1	0	1.64	2.036	0.428	0.428
sp|P0DMV8|HS71A_HUMAN	ATAGDTHLGGEDFDNRLVNHFVEEFK	26	973.47	3	Anatase_10x_LA_1_f10498	Anatase	10x	LA	1	0	8.66	4.548	0.549	0.549
sp|P0DMV8|HS71A_HUMAN	ATAGDTHLGGEDFDNRLVNHFVEEFK	26	730.35	4	Anatase_10x_LA_1_f10498	Anatase	10x	LA	1	0	3	3.567	0.528	0.528
sp|P29692|EF1D_HUMAN	ATAPQT#QHVSPMRQVEPPAK	20	751.702	3	Anatase_10x_LA_1_f10498	Anatase	10x	LA	1	1	2.51	2.066	0.003	0.26
sp|P29692|EF1D_HUMAN	ATAPQTQHVS#PM*R	13	760.342	2	Anatase_10x_LA_1_f10498	Anatase	10x	LA	1	1	2.68	2.071	0.173	0.173
sp|P29692|EF1D_HUMAN	ATAPQTQHVS#PMR	13	752.344	2	Anatase_10x_LA_1_f10498	Anatase	10x	LA	1	1	2.37	2.42	0.349	0.349
sp|P29692|EF1D_HUMAN	ATAPQTQHVS#PMR	13	501.898	3	Anatase_10x_LA_1_f10498	Anatase	10x	LA	1	1	2.14	1.684	0.272	0.326
sp|P29692|EF1D_HUMAN	ATAPQTQHVS#PMRQVEPPAK	20	1127.05	2	Anatase_10x_LA_1_f10498	Anatase	10x	LA	1	1	2.25	1.857	0.006	0.172
sp|P20936|RASA1_HUMAN	ATATQFVHHALK	12	662.364	2	Anatase_10x_LA_1_f10498	Anatase	10x	LA	1	0	2.61	2.721	0.486	0.486
sp|P20936|RASA1_HUMAN	ATATQFVHHALK	12	441.911	3	Anatase_10x_LA_1_f10498	Anatase	10x	LA	1	0	1.71	1.869	0.434	0.434
sp|Q06830|PRDX1_HUMAN	ATAVMPDGQFK	11	582.791	2	Anatase_10x_LA_1_f10498	Anatase	10x	LA	1	0	2.07	1.718	0.39	0.39
sp|P21333|FLNA_HUMAN	ATCAPQHGAPGPGPADASK	19	597.282	3	Anatase_10x_LA_1_f10498	Anatase	10x	LA	1	0	1.89	3.019	0.415	0.415
sp|P21333|FLNA_HUMAN	ATCAPQHGAPGPGPADASK	19	895.42	2	Anatase_10x_LA_1_f10498	Anatase	10x	LA	1	0	2.59	2.259	0.365	0.365
sp|Q8IZD4|DCP1B_HUMAN	ATCQETVEPPQTLHQQQQQQQQQQEK	26	1050.16	3	Anatase_10x_LA_1_f10498	Anatase	10x	LA	1	0	2.6	3.065	0.329	0.329
sp|O75521|ECI2_HUMAN	ATFHTPFSHLGQSPEGCSSYTFPK	24	895.083	3	Anatase_10x_LA_1_f10498	Anatase	10x	LA	1	0	3.66	3.708	0.397	0.397
sp|Q9H2Y7|ZN106_HUMAN	ATGDGS#S#PELPSLER	15	838.337	2	Anatase_10x_LA_1_f10498	Anatase	10x	LA	1	1	2.91	2.314	0.041	0.391
sp|Q8N3X1|FNBP4_HUMAN	ATGGLCLLGAYADS#DDDDNDVSEK	24	1291.02	2	Anatase_10x_LA_1_f10498	Anatase	10x	LA	1	1	2.92	4.022	0.21	0.55
sp|Q9HCS7|SYF1_HUMAN	ATGKPHTLWVAFAK	14	509.622	3	Anatase_10x_LA_1_f10498	Anatase	10x	LA	1	0	1.89	2.932	0.36	0.36
sp|P23381|SYWC_HUMAN	ATGQRPHHFLR	11	440.575	3	Anatase_10x_LA_1_f10498	Anatase	10x	LA	1	0	1.31	2.181	0.418	0.418
sp|P23381|SYWC_HUMAN	ATGQRPHHFLR	11	660.359	2	Anatase_10x_LA_1_f10498	Anatase	10x	LA	1	0	2.08	2.407	0.182	0.182
sp|Q8IZ81|ELMD2_HUMAN	ATHVVQSEVDKYVDDIMK	18	693.017	3	Anatase_10x_LA_1_f10498	Anatase	10x	LA	1	0	4.26	2.359	0.27	0.27
sp|Q63HN8|RN213_HUMAN	ATHYHLSSQVQEM*AGK	16	601.622	3	Anatase_10x_LA_1_f10498	Anatase	10x	LA	1	0	1.92	4.238	0.536	0.536
sp|Q63HN8|RN213_HUMAN	ATHYHLSSQVQEM*AGK	16	901.931	2	Anatase_10x_LA_1_f10498	Anatase	10x	LA	1	0	2.8	3.253	0.661	0.661
sp|Q63HN8|RN213_HUMAN	ATHYHLSSQVQEMAGK	16	596.291	3	Anatase_10x_LA_1_f10498	Anatase	10x	LA	1	0	2.37	4.232	0.628	0.628
sp|Q71UI9|H2AV_HUMAN	ATIAGGGVIPHIHK	14	457.602	3	Anatase_10x_LA_1_f10498	Anatase	10x	LA	1	0	1.58	2.721	0.422	0.422
sp|Q71UI9|H2AV_HUMAN	ATIAGGGVIPHIHK	14	685.9	2	Anatase_10x_LA_1_f10498	Anatase	10x	LA	1	0	1.65	3.414	0.553	0.553
sp|Q71UI9|H2AV_HUMAN	ATIAGGGVIPHIHK	14	457.602	3	Anatase_10x_LA_1_f10498	Anatase	10x	LA	1	0	1.84	2.183	0.287	0.287
sp|P22314|UBA1_HUMAN	ATLPS#PDKLPGFK	13	725.873	2	Anatase_10x_LA_1_f10498	Anatase	10x	LA	1	1	2.58	2.014	0.237	0.237
sp|Q8WWI1|LMO7_HUMAN	ATLSSTSGLDLMSESGEGEIS#PQREVSR	28	1001.79	3	Anatase_10x_LA_1_f10498	Anatase	10x	LA	1	1	3.04	2.54	0.186	0.232
sp|O76021|RL1D1_HUMAN	ATNES#EDEIPQLVPIGK	17	960.461	2	Anatase_10x_LA_1_f10498	Anatase	10x	LA	1	1	7.74	2.877	0.02	0.423
sp|O76021|RL1D1_HUMAN	ATNES#EDEIPQLVPIGKK	18	1024.5	2	Anatase_10x_LA_1_f10498	Anatase	10x	LA	1	1	3.11	3.073	0.015	0.442
sp|O43252|PAPS1_HUMAN	ATNVTYQAHHVSR	13	495.253	3	Anatase_10x_LA_1_f10498	Anatase	10x	LA	1	0	2.13	1.777	0.299	0.299
sp|O43252|PAPS1_HUMAN	ATNVTYQAHHVSR	13	742.375	2	Anatase_10x_LA_1_f10498	Anatase	10x	LA	1	0	2.32	2.756	0.473	0.473
sp|O95267|GRP1_HUMAN	ATQTESQPWIGSEGPSGPFVLSS#PRK	26	941.786	3	Anatase_10x_LA_1_f10498	Anatase	10x	LA	1	1	3.17	2.457	0.01	0.365
sp|O14950|ML12B_HUMAN	ATS#NVFAM*FDQSQIQEFK	18	1093.98	2	Anatase_10x_LA_1_f10498	Anatase	10x	LA	1	1	1.54	2.47	0.003	0.444
sp|O14950|ML12B_HUMAN	ATS#NVFAM*FDQSQIQEFK	18	1093.98	2	Anatase_10x_LA_1_f10498	Anatase	10x	LA	1	1	4.21	4.368	0.004	0.581
sp|P30622|CLIP1_HUMAN	ATS#PLCTSTASM*VSSSPSTPSNIPQKPSQPAAK	33	1137.87	3	Anatase_10x_LA_1_f10498	Anatase	10x	LA	1	1	2.15	2.647	0	0.282
sp|P30622|CLIP1_HUMAN	ATS#PLCTSTASMVSSSPSTPSNIPQKPSQPAAK	33	1132.54	3	Anatase_10x_LA_1_f10498	Anatase	10x	LA	1	1	1.84	4.199	0.011	0.583
sp|Q96G74|OTUD5_HUMAN	ATS#PLVSLYPALECR	15	878.922	2	Anatase_10x_LA_1_f10498	Anatase	10x	LA	1	1	1.88	2.726	0.011	0.524
sp|Q86U86|PB1_HUMAN	ATS#PSSSVS#GDFDDGHHSVSTPGPSRK	27	953.728	3	Anatase_10x_LA_1_f10498	Anatase	10x	LA	1	1	2.74	4.004	0.001	0.105
sp|Q8IU81|I2BP1_HUMAN	ATS#SGRLPLPSPALEYTLGSR	21	751.716	3	Anatase_10x_LA_1_f10498	Anatase	10x	LA	1	1	2.75	3.121	0.001	0.479
sp|Q5UIP0|RIF1_HUMAN	ATSEEDVSIKS#PICEK	16	936.92	2	Anatase_10x_LA_1_f10498	Anatase	10x	LA	1	1	2.02	2.596	0.164	0.541
sp|Q14980|NUMA1_HUMAN	ATSS#TQSLAR	10	551.252	2	Anatase_10x_LA_1_f10498	Anatase	10x	LA	1	1	2.41	2.123	0.043	0.278
sp|O75179|ANR17_HUMAN	ATVPVAAATAAEGEGS#PPAVAAVAGPPAAAEVGGGVGGSSR	41	1188.92	3	Anatase_10x_LA_1_f10498	Anatase	10x	LA	1	1	3.12	3.814	0.213	0.255
sp|Q9H1E3|NUCKS_HUMAN	ATVT#PS#PVK	9	530.231	2	Anatase_10x_LA_1_f10498	Anatase	10x	LA	1	1	1.98	1.652	0.376	0.376
sp|Q9H1E3|NUCKS_HUMAN	ATVTPS#PVK	9	490.248	2	Anatase_10x_LA_1_f10498	Anatase	10x	LA	1	1	1.89	2.08	0.356	0.479
sp|Q13586|STIM1_HUMAN	AVAEEDNGSIGEETDSS#PGRK	21	1114.47	2	Anatase_10x_LA_1_f10498	Anatase	10x	LA	1	1	1.94	2.383	0.117	0.281
sp|Q6PCE3|PGM2L_HUMAN	AVAGVM*IT#ASHNR	13	711.833	2	Anatase_10x_LA_1_f10498	Anatase	10x	LA	1	1	2.48	1.696	0.054	0.147
sp|P62195|PRS8_HUMAN	AVAHHTDCTFIR	12	714.347	2	Anatase_10x_LA_1_f10498	Anatase	10x	LA	1	0	1.64	2.248	0.42	0.42
sp|P62195|PRS8_HUMAN	AVAHHTDCTFIR	12	476.567	3	Anatase_10x_LA_1_f10498	Anatase	10x	LA	1	0	1.91	2.356	0.207	0.207
sp|P43686|PRS6B_HUMAN	AVAHHTTAAFIR	12	432.239	3	Anatase_10x_LA_1_f10498	Anatase	10x	LA	1	0	1.81	3.437	0.484	0.484
sp|P22626|ROA2_HUMAN	AVAREESGKPGAHVTVK	17	579.321	3	Anatase_10x_LA_1_f10498	Anatase	10x	LA	1	0	2.25	2.727	0.448	0.448
sp|Q71U36|TBA1A_HUMAN	AVCMLSNTTAIAEAWAR	17	932.959	2	Anatase_10x_LA_1_f10498	Anatase	10x	LA	1	0	3.21	2.499	0.457	0.457
sp|P62906|RL10A_HUMAN	AVDIPHM*DIEALKK	14	399.718	4	Anatase_10x_LA_1_f10498	Anatase	10x	LA	1	0	1.39	2.25	0.475	0.475
sp|P62906|RL10A_HUMAN	AVDIPHM*DIEALKK	14	532.621	3	Anatase_10x_LA_1_f10498	Anatase	10x	LA	1	0	1.94	1.438	0.176	0.176
sp|P62906|RL10A_HUMAN	AVDIPHMDIEALK	13	484.591	3	Anatase_10x_LA_1_f10498	Anatase	10x	LA	1	0	2.09	1.943	0.124	0.124
sp|P62906|RL10A_HUMAN	AVDIPHMDIEALKK	14	395.719	4	Anatase_10x_LA_1_f10498	Anatase	10x	LA	1	0	2.04	1.567	0.248	0.248
sp|P62906|RL10A_HUMAN	AVDIPHMDIEALKK	14	790.432	2	Anatase_10x_LA_1_f10498	Anatase	10x	LA	1	0	3.18	2.028	0.402	0.402
sp|Q9H165|BC11A_HUMAN	AVDKPPS#PSPIEMK	14	788.38	2	Anatase_10x_LA_1_f10498	Anatase	10x	LA	1	1	2.55	3.054	0.201	0.488
sp|Q9BW71|HIRP3_HUMAN	AVEES#S#DEERQR	12	797.795	2	Anatase_10x_LA_1_f10498	Anatase	10x	LA	1	1	2.67	1.465	0.278	0.278
sp|P06733|ENOA_HUMAN	AVEHINK	7	405.728	2	Anatase_10x_LA_1_f10498	Anatase	10x	LA	1	0	1.32	2.241	0.215	0.215
sp|P25788|PSA3_HUMAN	AVENSSTAIGIR	12	609.329	2	Anatase_10x_LA_1_f10498	Anatase	10x	LA	1	0	2.57	2.291	0.231	0.231
sp|O14617|AP3D1_HUMAN	AVFHEEEQRRPK	12	509.268	3	Anatase_10x_LA_1_f10498	Anatase	10x	LA	1	0	1.9	2.076	0.388	0.388
sp|P60709|ACTB_HUMAN	AVFPSIVGR	9	473.281	2	Anatase_10x_LA_1_f10498	Anatase	10x	LA	1	0	2.32	1.727	0.388	0.388
sp|P60709|ACTB_HUMAN	AVFPSIVGRPR	11	599.858	2	Anatase_10x_LA_1_f10498	Anatase	10x	LA	1	0	2.36	1.844	0.37	0.37
sp|Q71U36|TBA1A_HUMAN	AVFVDLEPTVIDEVR	15	851.458	2	Anatase_10x_LA_1_f10498	Anatase	10x	LA	1	0	1.36	3.389	0.547	0.547
sp|Q71U36|TBA1A_HUMAN	AVFVDLEPTVIDEVR	15	851.466	2	Anatase_10x_LA_1_f10498	Anatase	10x	LA	1	0	11.36	4.216	0.435	0.435
sp|P31146|COR1A_HUMAN	AVFVSEGK	8	418.73	2	Anatase_10x_LA_1_f10498	Anatase	10x	LA	1	0	2.23	1.611	0.294	0.294
sp|Q01518|CAP1_HUMAN	AVGRLEAVSHTSDM*HR	16	446.224	4	Anatase_10x_LA_1_f10498	Anatase	10x	LA	1	0	1.89	2.38	0.405	0.405
sp|Q01518|CAP1_HUMAN	AVGRLEAVSHTSDMHR	16	589.298	3	Anatase_10x_LA_1_f10498	Anatase	10x	LA	1	0	2.45	2.85	0.356	0.356
sp|Q7Z3B4|NUP54_HUMAN	AVGYSCMPSNKDEDGLVVLVFNKK	24	890.783	3	Anatase_10x_LA_1_f10498	Anatase	10x	LA	1	0	2.88	3.222	0.35	0.35
sp|Q9UFN0|NPS3A_HUMAN	AVHAHVNLGYTK	12	437.239	3	Anatase_10x_LA_1_f10498	Anatase	10x	LA	1	0	1.62	2.881	0.511	0.511
sp|P25440|BRD2_HUMAN	AVHEQLAALSQGPISKPK	18	625.356	3	Anatase_10x_LA_1_f10498	Anatase	10x	LA	1	0	2.04	4.377	0.466	0.466
sp|O60885|BRD4_HUMAN	AVHEQLAALSQPQQNKPK	18	663.03	3	Anatase_10x_LA_1_f10498	Anatase	10x	LA	1	0	2.45	3.98	0.56	0.56
sp|O60885|BRD4_HUMAN	AVHEQLAALSQPQQNKPK	18	497.524	4	Anatase_10x_LA_1_f10498	Anatase	10x	LA	1	0	2.02	2.902	0.444	0.444
sp|Q86YT6|MIB1_HUMAN	AVHHAAFGDEGAVIEVLHR	19	507.767	4	Anatase_10x_LA_1_f10498	Anatase	10x	LA	1	0	2.04	5.227	0.602	0.602
sp|Q86YT6|MIB1_HUMAN	AVHHAAFGDEGAVIEVLHR	19	676.687	3	Anatase_10x_LA_1_f10498	Anatase	10x	LA	1	0	3.11	2.541	0.34	0.34
sp|Q9H0K6|PUS7L_HUMAN	AVHHFVNK	8	476.262	2	Anatase_10x_LA_1_f10498	Anatase	10x	LA	1	0	1.8	2.376	0.401	0.401
sp|Q6IA86|ELP2_HUMAN	AVHLQGHEGPVYAVHAVYQR	20	558.543	4	Anatase_10x_LA_1_f10498	Anatase	10x	LA	1	0	2.02	2.96	0.432	0.432
sp|Q6IA86|ELP2_HUMAN	AVHLQGHEGPVYAVHAVYQR	20	447.036	5	Anatase_10x_LA_1_f10498	Anatase	10x	LA	1	0	1.47	2.15	0.379	0.379
sp|Q6IA86|ELP2_HUMAN	AVHLQGHEGPVYAVHAVYQR	20	744.389	3	Anatase_10x_LA_1_f10498	Anatase	10x	LA	1	0	2.01	4.405	0.474	0.474
sp|O15144|ARPC2_HUMAN	AVIHYRDDETM*YVESKK	17	525.758	4	Anatase_10x_LA_1_f10498	Anatase	10x	LA	1	0	2.28	2.694	0.387	0.387
sp|O15144|ARPC2_HUMAN	AVIHYRDDETM*YVESKK	17	700.675	3	Anatase_10x_LA_1_f10498	Anatase	10x	LA	1	0	2.34	4.061	0.529	0.529
sp|O15144|ARPC2_HUMAN	AVIHYRDDETMYVESKK	17	521.759	4	Anatase_10x_LA_1_f10498	Anatase	10x	LA	1	0	2.07	3.334	0.415	0.415
sp|O15144|ARPC2_HUMAN	AVIHYRDDETMYVESKK	17	695.343	3	Anatase_10x_LA_1_f10498	Anatase	10x	LA	1	0	1.98	4.468	0.45	0.45
sp|Q8N3C0|ASCC3_HUMAN	AVILVHDIKK	10	568.364	2	Anatase_10x_LA_1_f10498	Anatase	10x	LA	1	0	1.58	1.083	0.294	0.294
sp|P23528|COF1_HUMAN	AVLFCLSEDKK	11	655.347	2	Anatase_10x_LA_1_f10498	Anatase	10x	LA	1	0	2.87	2.17	0.333	0.333
sp|Q92540|SMG7_HUMAN	AVPALGKS#PPHHSGFQQYQQADASK	25	683.078	4	Anatase_10x_LA_1_f10498	Anatase	10x	LA	1	1	2.01	2.984	0.153	0.295
sp|Q9Y2K6|UBP20_HUMAN	AVPIAVADEGES#ES#EDDDLKPR	22	1251.52	2	Anatase_10x_LA_1_f10498	Anatase	10x	LA	1	1	3.08	3.265	0.535	0.535
sp|Q8IWZ8|SUGP1_HUMAN	AVQQHQHGYDS#DEEVDSELGTWEHQLR	27	819.105	4	Anatase_10x_LA_1_f10498	Anatase	10x	LA	1	1	2.97	4.141	0.098	0.47
sp|Q8IWZ8|SUGP1_HUMAN	AVQQHQHGYDS#DEEVDSELGTWEHQLR	27	1091.8	3	Anatase_10x_LA_1_f10498	Anatase	10x	LA	1	1	2.59	4.14	0.067	0.419
sp|Q8IWZ8|SUGP1_HUMAN	AVQQHQHGYDS#DEEVDSELGTWEHQLR	27	819.105	4	Anatase_10x_LA_1_f10498	Anatase	10x	LA	1	1	3.17	4.16	0.085	0.514
sp|Q8IWZ8|SUGP1_HUMAN	AVQQHQHGYDS#DEEVDSELGTWEHQLR	27	1091.8	3	Anatase_10x_LA_1_f10498	Anatase	10x	LA	1	1	2.83	5.6	0.021	0.475
sp|Q9P275|UBP36_HUMAN	AVS#PAPQSSSR	11	583.765	2	Anatase_10x_LA_1_f10498	Anatase	10x	LA	1	1	2.27	1.717	0.318	0.318
sp|P29590|PML_HUMAN	AVS#PPHLDGPPS#PR	14	793.844	2	Anatase_10x_LA_1_f10498	Anatase	10x	LA	1	1	2.82	1.419	0.287	0.287
sp|Q13153|PAK1_HUMAN	AVSETPAVPPVSEDEDDDDDDAT#PPPVIAPRPEHTK	36	1296.92	3	Anatase_10x_LA_1_f10498	Anatase	10x	LA	1	1	2.16	3.235	0.124	0.352
sp|P51991|ROA3_HUMAN	AVSREDSVKPGAHLTVK	17	449.253	4	Anatase_10x_LA_1_f10498	Anatase	10x	LA	1	0	1.96	3.411	0.521	0.521
sp|P51991|ROA3_HUMAN	AVSREDSVKPGAHLTVK	17	598.668	3	Anatase_10x_LA_1_f10498	Anatase	10x	LA	1	0	2.1	2.5	0.269	0.269
sp|Q13617|CUL2_HUMAN	AVSTGLPHMIQELQNHIHDEGLR	23	865.777	3	Anatase_10x_LA_1_f10498	Anatase	10x	LA	1	0	2.97	3.788	0.623	0.623
sp|Q13617|CUL2_HUMAN	AVSTGLPHMIQELQNHIHDEGLR	23	865.783	3	Anatase_10x_LA_1_f10498	Anatase	10x	LA	1	0	9.07	2.779	0.487	0.487
sp|P14317|HCLS1_HUMAN	AVT#KRSPEAPQPVIAM*EEPAVPAPLPK	27	973.842	3	Anatase_10x_LA_1_f10498	Anatase	10x	LA	1	1	2.2	5.04	0.005	0.502
sp|P14317|HCLS1_HUMAN	AVT#KRSPEAPQPVIAMEEPAVPAPLPK	27	968.51	3	Anatase_10x_LA_1_f10498	Anatase	10x	LA	1	1	2.29	5.14	0.019	0.577
sp|P14317|HCLS1_HUMAN	AVT#KRSPEAPQPVIAMEEPAVPAPLPK	27	726.635	4	Anatase_10x_LA_1_f10498	Anatase	10x	LA	1	1	3.01	3.989	0.079	0.582
sp|Q86UW6|N4BP2_HUMAN	AVT#PENHESMTSIFPSAAVGLK	22	789.378	3	Anatase_10x_LA_1_f10498	Anatase	10x	LA	1	1	3.52	3.088	0.162	0.176
sp|Q86UW6|N4BP2_HUMAN	AVT#PENHESMTSIFPSAAVGLK	22	1183.56	2	Anatase_10x_LA_1_f10498	Anatase	10x	LA	1	1	1.33	2.025	0.065	0.322
sp|Q9HD26|GOPC_HUMAN	AVTDTHENGDLGTASETPLDDGASKLDDLHTLYHK	35	934.947	4	Anatase_10x_LA_1_f10498	Anatase	10x	LA	1	0	2.73	3.754	0.328	0.328
sp|Q8NEF9|SRFB1_HUMAN	AVTIANS#PSKPSEK	14	754.874	2	Anatase_10x_LA_1_f10498	Anatase	10x	LA	1	1	2.74	3.051	0.138	0.338
sp|Q9H2U1|DHX36_HUMAN	AVVHMDERREEQIVQLLNSVQAK	23	673.863	4	Anatase_10x_LA_1_f10498	Anatase	10x	LA	1	0	3.61	4.536	0.393	0.393
sp|Q15233|NONO_HUMAN	AVVIVDDR	8	443.754	2	Anatase_10x_LA_1_f10498	Anatase	10x	LA	1	0	1.35	1.87	0.249	0.249
sp|Q9BQ52|RNZ2_HUMAN	AWLQQYHNQCQEVLHHISMIPAK	23	708.604	4	Anatase_10x_LA_1_f10498	Anatase	10x	LA	1	0	2.73	2.958	0.233	0.233
sp|Q9BQ52|RNZ2_HUMAN	AWLQQYHNQCQEVLHHISMIPAK	23	567.084	5	Anatase_10x_LA_1_f10498	Anatase	10x	LA	1	0	1.91	2.777	0.267	0.267
sp|Q14204|DYHC1_HUMAN	AWTQVLLGQAEDKAEVDM*DTDAPQVSHKPGGEPK	34	916.698	4	Anatase_10x_LA_1_f10498	Anatase	10x	LA	1	0	2.57	4.438	0.484	0.484
sp|Q14204|DYHC1_HUMAN	AWTQVLLGQAEDKAEVDMDTDAPQVSHKPGGEPK	34	912.701	4	Anatase_10x_LA_1_f10498	Anatase	10x	LA	1	0	4.43	3.945	0.368	0.368
sp|Q14204|DYHC1_HUMAN	AWTQVLLGQAEDKAEVDMDTDAPQVSHKPGGEPK	34	730.36	5	Anatase_10x_LA_1_f10498	Anatase	10x	LA	1	0	2.22	3.813	0.392	0.392
sp|P18074|ERCC2_HUMAN	AY#PLEVTK	8	500.743	2	Anatase_10x_LA_1_f10498	Anatase	10x	LA	1	1	3.6	1.712	0.184	0.184
sp|P18074|ERCC2_HUMAN	AY#PLEVTK	8	500.743	2	Anatase_10x_LA_1_f10498	Anatase	10x	LA	1	1	3.6	1.803	0.255	0.255
sp|Q9NY33|DPP3_HUMAN	AYAANSHQGQM*LAQYIESFTQGSIEAHK	28	774.869	4	Anatase_10x_LA_1_f10498	Anatase	10x	LA	1	0	2.61	4.667	0.528	0.528
sp|Q9NY33|DPP3_HUMAN	AYAANSHQGQM*LAQYIESFTQGSIEAHK	28	1032.82	3	Anatase_10x_LA_1_f10498	Anatase	10x	LA	1	0	2.98	3.648	0.276	0.276
sp|Q9NY33|DPP3_HUMAN	AYAANSHQGQMLAQYIESFTQGSIEAHK	28	770.873	4	Anatase_10x_LA_1_f10498	Anatase	10x	LA	1	0	5.8	4.32	0.355	0.355
sp|Q7Z3K3|POGZ_HUMAN	AYANHMINNHVPR	13	512.922	3	Anatase_10x_LA_1_f10498	Anatase	10x	LA	1	0	1.08	1.8	0.207	0.207
sp|Q9Y2Z0|SGT1_HUMAN	AYCHILLGNYCVAVADAKK	19	542.277	4	Anatase_10x_LA_1_f10498	Anatase	10x	LA	1	0	1.94	3.805	0.453	0.453
sp|Q9NVP1|DDX18_HUMAN	AYDSHSLK	8	460.728	2	Anatase_10x_LA_1_f10498	Anatase	10x	LA	1	0	2.03	1.576	0.308	0.308
sp|Q9UPN3|MACF1_HUMAN	AYHDLCDGSANQLQQLQSQLAHQTEQK	27	1037.83	3	Anatase_10x_LA_1_f10498	Anatase	10x	LA	1	0	2.95	5.035	0.537	0.537
sp|Q9UPN3|MACF1_HUMAN	AYHDLCDGSANQLQQLQSQLAHQTEQK	27	1037.83	3	Anatase_10x_LA_1_f10498	Anatase	10x	LA	1	0	3	4.424	0.565	0.565
sp|Q9UPN3|MACF1_HUMAN	AYHDLCDGSANQLQQLQSQLAHQTEQK	27	778.622	4	Anatase_10x_LA_1_f10498	Anatase	10x	LA	1	0	3.23	4.342	0.289	0.289
sp|Q9UPN3|MACF1_HUMAN	AYHDLCDGSANQLQQLQSQLAHQTEQK	27	1037.83	3	Anatase_10x_LA_1_f10498	Anatase	10x	LA	1	0	3.77	4.787	0.53	0.53
sp|Q71U36|TBA1A_HUMAN	AYHEQLSVAEITNACFEPANQM*VK	24	922.769	3	Anatase_10x_LA_1_f10498	Anatase	10x	LA	1	0	1.99	4.445	0.441	0.441
sp|Q71U36|TBA1A_HUMAN	AYHEQLSVAEITNACFEPANQMVK	24	917.437	3	Anatase_10x_LA_1_f10498	Anatase	10x	LA	1	0	1.8	5.253	0.5	0.5
sp|Q71U36|TBA1A_HUMAN	AYHEQLSVAEITNACFEPANQMVK	24	917.437	3	Anatase_10x_LA_1_f10498	Anatase	10x	LA	1	0	1.84	5.244	0.409	0.409
sp|Q93052|LPP_HUMAN	AYHPHCFTCVMCHR	14	469.698	4	Anatase_10x_LA_1_f10498	Anatase	10x	LA	1	0	2.07	4.07	0.539	0.539
sp|Q93052|LPP_HUMAN	AYHPHCFTCVMCHR	14	625.929	3	Anatase_10x_LA_1_f10498	Anatase	10x	LA	1	0	2.87	3.909	0.601	0.601
sp|Q15418|KS6A1_HUMAN	AYS#FCGTVEYMAPEVVNR	18	1086.96	2	Anatase_10x_LA_1_f10498	Anatase	10x	LA	1	1	3.74	3.684	0.004	0.591
sp|P50613|CDK7_HUMAN	AYT#HQVVTR	9	577.773	2	Anatase_10x_LA_1_f10498	Anatase	10x	LA	1	1	2.17	2.58	0.175	0.396
sp|O95825|QORL1_HUMAN	AYTALHYLSHLSPGK	15	553.296	3	Anatase_10x_LA_1_f10498	Anatase	10x	LA	1	0	2.79	2.748	0.509	0.509
sp|Q8TBZ6|TM10A_HUMAN	AYVIGGLVDHNHHK	14	780.409	2	Anatase_10x_LA_1_f10498	Anatase	10x	LA	1	0	2.31	2.433	0.391	0.391
sp|P13796|PLSL_HUMAN	AYYHLLEQVAPK	12	477.927	3	Anatase_10x_LA_1_f10498	Anatase	10x	LA	1	0	2.4	3.597	0.522	0.522
sp|P13796|PLSL_HUMAN	AYYHLLEQVAPK	12	477.927	3	Anatase_10x_LA_1_f10498	Anatase	10x	LA	1	0	2.7	3.205	0.414	0.414
sp|Q7L2J0|MEPCE_HUMAN	CAPSAGS#PAAAVGRES#PGAAATSSSGPQAQQHR	33	1093.81	3	Anatase_10x_LA_1_f10498	Anatase	10x	LA	1	1	1.52	3.319	0.055	0.385
##sp|P52742|ZN135_HUMAN	CAY#PKEGTHIRR	12	784.365	2	Anatase_10x_LA_1_f10498	Anatase	10x	LA	1	1	1.47	1.631	0.304	0.304
##sp|Q5TA78|LCE4A_HUMAN	CCGGGSCCGS#GGSQQGS#GSGYCNS#SKPR	28	1032.66	3	Anatase_10x_LA_1_f10498	Anatase	10x	LA	1	1	-1.34	1.635	0.066	0.49
##sp|Q5T754|LCE1F_HUMAN	CCGGSHQGS#GGGCCS#S#GASPQSCCDSSQPR	30	1124.68	3	Anatase_10x_LA_1_f10498	Anatase	10x	LA	1	1	4.43	1.581	0.076	0.389
sp|Q9H3P7|GCP60_HUMAN	CCHLFSTYVASHK	13	537.248	3	Anatase_10x_LA_1_f10498	Anatase	10x	LA	1	0	2.65	2.561	0.486	0.486
sp|Q9H3P7|GCP60_HUMAN	CCHLFSTYVASHK	13	403.187	4	Anatase_10x_LA_1_f10498	Anatase	10x	LA	1	0	1.76	3.504	0.425	0.425
sp|P62979|RS27A_HUMAN	CCLTYCFNKPEDK	13	867.87	2	Anatase_10x_LA_1_f10498	Anatase	10x	LA	1	0	2.44	3.776	0.482	0.482
sp|O14646|CHD1_HUMAN	CCNHCYLIKPPDNNEFYNK	19	829.364	3	Anatase_10x_LA_1_f10498	Anatase	10x	LA	1	0	3.05	3.006	0.129	0.129
sp|O60264|SMCA5_HUMAN	CCNHPYLFDGAEPGPPYTTDMHLVTNSGK	29	820.365	4	Anatase_10x_LA_1_f10498	Anatase	10x	LA	1	0	1.8	2.852	0.245	0.245
##sp|Q9BYQ6|KR411_HUMAN	CCS#SVCCSPRCCS#S#ICCR	18	865.916	3	Anatase_10x_LA_1_f10498	Anatase	10x	LA	1	1	1.71	1.034	0.243	0.478
sp|Q9H3U1|UN45A_HUMAN	CDAERENFHR	10	445.196	3	Anatase_10x_LA_1_f10498	Anatase	10x	LA	1	0	1.72	2.884	0.41	0.41
sp|Q96JM3|CHAP1_HUMAN	CDILVQEELLAS#PKK	15	911.958	2	Anatase_10x_LA_1_f10498	Anatase	10x	LA	1	1	3.29	2.545	0.224	0.224
sp|P02765|FETUA_HUMAN	CDSSPDS#AEDVRK	13	773.3	2	Anatase_10x_LA_1_f10498	Anatase	10x	LA	1	1	2.35	3.075	0.311	0.505
sp|P02765|FETUA_HUMAN	CDSSPDS#AEDVRK	13	515.869	3	Anatase_10x_LA_1_f10498	Anatase	10x	LA	1	1	2.16	1.937	0.22	0.518
sp|P02765|FETUA_HUMAN	CDSSPDSAEDVRK	13	489.213	3	Anatase_10x_LA_1_f10498	Anatase	10x	LA	1	0	2.03	2.899	0.401	0.401
sp|P02765|FETUA_HUMAN	CDSSPDSAEDVRK	13	733.317	2	Anatase_10x_LA_1_f10498	Anatase	10x	LA	1	0	3.05	3.076	0.568	0.568
sp|P60709|ACTB_HUMAN	CDVDIRK	7	453.23	2	Anatase_10x_LA_1_f10498	Anatase	10x	LA	1	0	1.96	2.436	0.141	0.141
sp|Q6P1X6|CH082_HUMAN	CEDRPVVFTHLLTADHGPPR	20	580.045	4	Anatase_10x_LA_1_f10498	Anatase	10x	LA	1	0	2.9	4.529	0.561	0.561
sp|Q9UJW0|DCTN4_HUMAN	CEHNLSKPEFNPTSIK	16	475.987	4	Anatase_10x_LA_1_f10498	Anatase	10x	LA	1	0	1.78	2.804	0.343	0.343
sp|Q9UJW0|DCTN4_HUMAN	CEHNLSKPEFNPTSIK	16	634.314	3	Anatase_10x_LA_1_f10498	Anatase	10x	LA	1	0	2.36	2.825	0.388	0.388
sp|Q9BTE6|AASD1_HUMAN	CGAEDHVEAVKK	12	448.22	3	Anatase_10x_LA_1_f10498	Anatase	10x	LA	1	0	2.01	3.818	0.392	0.392
sp|P62633|CNBP_HUMAN	CGETGHVAINCSK	13	716.821	2	Anatase_10x_LA_1_f10498	Anatase	10x	LA	1	0	2.5	3.705	0.542	0.542
sp|Q15637|SF01_HUMAN	CGGAGHIASDCK	12	616.763	2	Anatase_10x_LA_1_f10498	Anatase	10x	LA	1	0	2.53	3.272	0.546	0.546
sp|Q15637|SF01_HUMAN	CGGAGHIASDCK	12	411.51	3	Anatase_10x_LA_1_f10498	Anatase	10x	LA	1	0	1.83	2.87	0.5	0.5
sp|Q5VZL5|ZMYM4_HUMAN	CGGVEQASSS#PR	12	657.762	2	Anatase_10x_LA_1_f10498	Anatase	10x	LA	1	1	2.47	1.924	0.126	0.135
sp|Q6JBY9|CPZIP_HUMAN	CGS#PREEKPAGEEAEMEK	18	1057.43	2	Anatase_10x_LA_1_f10498	Anatase	10x	LA	1	1	2.65	1.802	0.246	0.246
sp|P06748|NPM_HUMAN	CGSGPVHISGQHLVAVEEDAES#EDEEEEDVK	31	1154.15	3	Anatase_10x_LA_1_f10498	Anatase	10x	LA	1	1	2.19	5.708	0.496	0.496
sp|P06748|NPM_HUMAN	CGSGPVHISGQHLVAVEEDAES#EDEEEEDVK	31	1154.15	3	Anatase_10x_LA_1_f10498	Anatase	10x	LA	1	1	2.69	5.608	0.45	0.45
sp|P06748|NPM_HUMAN	CGSGPVHISGQHLVAVEEDAES#EDEEEEDVK	31	1154.16	3	Anatase_10x_LA_1_f10498	Anatase	10x	LA	1	1	4.16	5.099	0.484	0.484
sp|P06748|NPM_HUMAN	CGSGPVHISGQHLVAVEEDAES#EDEEEEDVK	31	1154.15	3	Anatase_10x_LA_1_f10498	Anatase	10x	LA	1	1	2.11	6.478	0.575	0.575
sp|P06748|NPM_HUMAN	CGSGPVHISGQHLVAVEEDAES#EDEEEEDVK	31	865.867	4	Anatase_10x_LA_1_f10498	Anatase	10x	LA	1	1	2.63	4.073	0.433	0.433
sp|P06748|NPM_HUMAN	CGSGPVHISGQHLVAVEEDAES#EDEEEEDVK	31	1154.15	3	Anatase_10x_LA_1_f10498	Anatase	10x	LA	1	1	2.31	6.247	0.491	0.491
sp|P06748|NPM_HUMAN	CGSGPVHISGQHLVAVEEDAES#EDEEEEDVK	31	865.867	4	Anatase_10x_LA_1_f10498	Anatase	10x	LA	1	1	2.38	4.803	0.431	0.431
sp|P06748|NPM_HUMAN	CGSGPVHISGQHLVAVEEDAES#EDEEEEDVK	31	1154.15	3	Anatase_10x_LA_1_f10498	Anatase	10x	LA	1	1	2.5	6.31	0.51	0.51
sp|P06748|NPM_HUMAN	CGSGPVHISGQHLVAVEEDAES#EDEEEEDVK	31	1154.15	3	Anatase_10x_LA_1_f10498	Anatase	10x	LA	1	1	2.02	6.672	0.52	0.52
sp|P06748|NPM_HUMAN	CGSGPVHISGQHLVAVEEDAES#EDEEEEDVK	31	1154.15	3	Anatase_10x_LA_1_f10498	Anatase	10x	LA	1	1	2.9	5.497	0.43	0.43
sp|P06748|NPM_HUMAN	CGSGPVHISGQHLVAVEEDAES#EDEEEEDVK	31	1154.15	3	Anatase_10x_LA_1_f10498	Anatase	10x	LA	1	1	2.38	6.056	0.474	0.474
sp|P06748|NPM_HUMAN	CGSGPVHISGQHLVAVEEDAES#EDEEEEDVK	31	1154.15	3	Anatase_10x_LA_1_f10498	Anatase	10x	LA	1	1	2.42	4.965	0.415	0.415
sp|P06748|NPM_HUMAN	CGSGPVHISGQHLVAVEEDAES#EDEEEEDVK	31	1154.15	3	Anatase_10x_LA_1_f10498	Anatase	10x	LA	1	1	2.48	5.624	0.42	0.42
sp|P06748|NPM_HUMAN	CGSGPVHISGQHLVAVEEDAES#EDEEEEDVK	31	1154.15	3	Anatase_10x_LA_1_f10498	Anatase	10x	LA	1	1	-2.22	4.191	0.381	0.381
sp|P06748|NPM_HUMAN	CGSGPVHISGQHLVAVEEDAES#EDEEEEDVK	31	1154.15	3	Anatase_10x_LA_1_f10498	Anatase	10x	LA	1	1	-4.55	4.655	0.463	0.463
sp|P06748|NPM_HUMAN	CGSGPVHISGQHLVAVEEDAES#EDEEEEDVK	31	1154.15	3	Anatase_10x_LA_1_f10498	Anatase	10x	LA	1	1	-3.55	5.407	0.388	0.388
sp|P06748|NPM_HUMAN	CGSGPVHISGQHLVAVEEDAES#EDEEEEDVK	31	1154.15	3	Anatase_10x_LA_1_f10498	Anatase	10x	LA	1	1	-2.56	3.861	0.345	0.345
sp|P06748|NPM_HUMAN	CGSGPVHISGQHLVAVEEDAES#EDEEEEDVK	31	1154.15	3	Anatase_10x_LA_1_f10498	Anatase	10x	LA	1	1	-4.35	4.258	0.398	0.398
sp|P06748|NPM_HUMAN	CGSGPVHISGQHLVAVEEDAES#EDEEEEDVK	31	1154.16	3	Anatase_10x_LA_1_f10498	Anatase	10x	LA	1	1	4.16	3.096	0.301	0.301
sp|P06748|NPM_HUMAN	CGSGPVHISGQHLVAVEEDAES#EDEEEEDVK	31	1154.15	3	Anatase_10x_LA_1_f10498	Anatase	10x	LA	1	1	-3.99	4.156	0.394	0.394
sp|P06748|NPM_HUMAN	CGSGPVHISGQHLVAVEEDAESEDEEEEDVK	31	1127.49	3	Anatase_10x_LA_1_f10498	Anatase	10x	LA	1	0	-0.51	4.099	0.292	0.292
sp|P10636|TAU_HUMAN	CGSLGNIHHKPGGGQVEVK	19	658.672	3	Anatase_10x_LA_1_f10498	Anatase	10x	LA	1	0	2.4	3.316	0.441	0.441
sp|O95757|HS74L_HUMAN	CHAEHTPEEEIDHTGAK	17	654.288	3	Anatase_10x_LA_1_f10498	Anatase	10x	LA	1	0	2.39	4.205	0.547	0.547
sp|O95757|HS74L_HUMAN	CHAEHTPEEEIDHTGAK	17	490.968	4	Anatase_10x_LA_1_f10498	Anatase	10x	LA	1	0	1.71	2.741	0.213	0.213
sp|O95757|HS74L_HUMAN	CHAEHTPEEEIDHTGAK	17	980.928	2	Anatase_10x_LA_1_f10498	Anatase	10x	LA	1	0	2.22	2.197	0.255	0.255
sp|P11172|UMPS_HUMAN	CHEFLIFEDRK	11	498.579	3	Anatase_10x_LA_1_f10498	Anatase	10x	LA	1	0	1.9	3.093	0.248	0.248
sp|Q9NTJ3|SMC4_HUMAN	CHEMKPNLGAIAEYK	15	587.621	3	Anatase_10x_LA_1_f10498	Anatase	10x	LA	1	0	2.09	3.26	0.497	0.497
sp|Q6ZNB6|NFXL1_HUMAN	CHFGSCPPCHQPCQK	15	633.923	3	Anatase_10x_LA_1_f10498	Anatase	10x	LA	1	0	2.32	3.584	0.508	0.508
sp|Q6ZNB6|NFXL1_HUMAN	CHFGSCPPCHQPCQK	15	475.694	4	Anatase_10x_LA_1_f10498	Anatase	10x	LA	1	0	1.92	2.57	0.257	0.257
sp|P47974|TISD_HUMAN	CHFIHNADER	10	649.79	2	Anatase_10x_LA_1_f10498	Anatase	10x	LA	1	0	2.06	1.931	0.328	0.328
sp|P47974|TISD_HUMAN	CHFIHNADER	10	433.529	3	Anatase_10x_LA_1_f10498	Anatase	10x	LA	1	0	2.38	2.688	0.324	0.324
sp|P14317|HCLS1_HUMAN	CHGHFGLFPANYVK	14	549.602	3	Anatase_10x_LA_1_f10498	Anatase	10x	LA	1	0	1.89	3.503	0.275	0.275
sp|P14317|HCLS1_HUMAN	CHGHFGLFPANYVK	14	412.453	4	Anatase_10x_LA_1_f10498	Anatase	10x	LA	1	0	1.41	2.985	0.29	0.29
sp|O76031|CLPX_HUMAN	CHHFFVVLSEADSKK	15	451.728	4	Anatase_10x_LA_1_f10498	Anatase	10x	LA	1	0	2.15	4.456	0.49	0.49
sp|Q13422|IKZF1_HUMAN	CHLCNYACR	9	627.254	2	Anatase_10x_LA_1_f10498	Anatase	10x	LA	1	0	2.55	2.099	0.487	0.487
sp|Q92889|XPF_HUMAN	CHNPSLEVEDLSLENAIGKPFDK	23	653.825	4	Anatase_10x_LA_1_f10498	Anatase	10x	LA	1	0	4.3	3.42	0.241	0.241
sp|Q9UKS7|IKZF2_HUMAN	CHNYLQNVSMEAAGQVMSHHVPPMEDCK	28	818.108	4	Anatase_10x_LA_1_f10498	Anatase	10x	LA	1	0	1.73	2.456	0.219	0.219
sp|P55212|CASP6_HUMAN	CHSLVGKPK	9	513.283	2	Anatase_10x_LA_1_f10498	Anatase	10x	LA	1	0	2.15	2.33	0.438	0.438
sp|Q9NVX0|HAUS2_HUMAN	CHTLQSMNNHLEAVLK	16	632.316	3	Anatase_10x_LA_1_f10498	Anatase	10x	LA	1	0	3.11	3.256	0.506	0.506
sp|P33991|MCM4_HUMAN	CHTTHSM*ALIHNR	13	531.919	3	Anatase_10x_LA_1_f10498	Anatase	10x	LA	1	0	2.39	1.951	0.241	0.241
sp|P33991|MCM4_HUMAN	CHTTHSM*ALIHNR	13	797.375	2	Anatase_10x_LA_1_f10498	Anatase	10x	LA	1	0	2.89	2.529	0.516	0.516
sp|P33991|MCM4_HUMAN	CHTTHSM*ALIHNR	13	399.191	4	Anatase_10x_LA_1_f10498	Anatase	10x	LA	1	0	1.88	3.168	0.449	0.449
sp|P33991|MCM4_HUMAN	CHTTHSMALIHNR	13	395.192	4	Anatase_10x_LA_1_f10498	Anatase	10x	LA	1	0	1.46	3.596	0.518	0.518
sp|P33991|MCM4_HUMAN	CHTTHSMALIHNR	13	789.377	2	Anatase_10x_LA_1_f10498	Anatase	10x	LA	1	0	2.83	3.479	0.563	0.563
sp|P33991|MCM4_HUMAN	CHTTHSMALIHNR	13	526.587	3	Anatase_10x_LA_1_f10498	Anatase	10x	LA	1	0	1.77	4.421	0.448	0.448
sp|P49790|NU153_HUMAN	CIACQAAKLS#PR	12	727.838	2	Anatase_10x_LA_1_f10498	Anatase	10x	LA	1	1	2.57	2.1	0.451	0.451
sp|Q15424|SAFB1_HUMAN	CINHLHK	7	461.241	2	Anatase_10x_LA_1_f10498	Anatase	10x	LA	1	0	1.7	1.751	0.212	0.212
sp|Q6P2Q9|PRP8_HUMAN	CIVM*VPQWGTHQTVHLPGQLPQHEYLK	27	643.331	5	Anatase_10x_LA_1_f10498	Anatase	10x	LA	1	0	3.34	3.836	0.403	0.403
sp|Q6P2Q9|PRP8_HUMAN	CIVMVPQWGTHQTVHLPGQLPQHEYLK	27	799.912	4	Anatase_10x_LA_1_f10498	Anatase	10x	LA	1	0	2.93	3.347	0.468	0.468
sp|P20700|LMNB1_HUMAN	CKAEHDQLLLNYAK	14	568.292	3	Anatase_10x_LA_1_f10498	Anatase	10x	LA	1	0	1.92	4.66	0.443	0.443
##sp|P02795|MT2_HUMAN	CKCSGACTCS#DGAACS#CNPDM*	21	848.899	3	Anatase_10x_LA_1_f10498	Anatase	10x	LA	1	1	-11.39	1.232	0.135	0.876
sp|P27797|CALR_HUMAN	CKDDEFTHLYTLIVRPDNTYEVK	23	714.854	4	Anatase_10x_LA_1_f10498	Anatase	10x	LA	1	0	2.86	3.944	0.44	0.44
sp|P27797|CALR_HUMAN	CKDDEFTHLYTLIVRPDNTYEVK	23	952.804	3	Anatase_10x_LA_1_f10498	Anatase	10x	LA	1	0	3.2	6.256	0.536	0.536
sp|Q9NP92|RT30_HUMAN	CKPDKLPLFK	10	415.907	3	Anatase_10x_LA_1_f10498	Anatase	10x	LA	1	0	2.28	2.231	0.154	0.154
sp|Q14584|ZN266_HUMAN	CKQCGKSFS#Y#SNSFQLHER	19	1262	2	Anatase_10x_LA_1_f10498	Anatase	10x	LA	1	1	0.73	2.103	0.023	0.368
sp|O95248|MTMR5_HUMAN	CLAQELHLHVQQNR	14	437.228	4	Anatase_10x_LA_1_f10498	Anatase	10x	LA	1	0	1.41	2.572	0.333	0.333
sp|Q96S59|RANB9_HUMAN	CLGGRS#PK	8	477.716	2	Anatase_10x_LA_1_f10498	Anatase	10x	LA	1	1	1.94	2.081	0.25	0.25
sp|P49755|TMEDA_HUMAN	CLREEIHK	8	542.783	2	Anatase_10x_LA_1_f10498	Anatase	10x	LA	1	0	2.3	1.722	0.225	0.225
sp|Q9Y2K7|KDM2A_HUMAN	CLVDKLESLPLHK	13	517.958	3	Anatase_10x_LA_1_f10498	Anatase	10x	LA	1	0	2.02	3.187	0.416	0.416
sp|P09455|RET1_HUMAN	CM*TTVSWDGDKLQCVQK	17	1036.47	2	Anatase_10x_LA_1_f10498	Anatase	10x	LA	1	0	2.78	1.507	0.214	0.214
sp|Q9UBQ5|EIF3K_HUMAN	CMIDQAHQEERPIR	14	594.952	3	Anatase_10x_LA_1_f10498	Anatase	10x	LA	1	0	2.54	1.673	0.182	0.182
sp|P31948|STIP1_HUMAN	CMM*AQYNRHDS#PEDVK	16	692.939	3	Anatase_10x_LA_1_f10498	Anatase	10x	LA	1	1	2.47	1.863	0.081	0.204
sp|P31948|STIP1_HUMAN	CMMAQYNRHDS#PEDVK	16	687.607	3	Anatase_10x_LA_1_f10498	Anatase	10x	LA	1	1	2.1	2.929	0.339	0.339
sp|P50914|RL14_HUMAN	CMQLTDFILK	10	634.824	2	Anatase_10x_LA_1_f10498	Anatase	10x	LA	1	0	2.5	1.708	0.246	0.246
sp|P11142|HSP7C_HUMAN	CNEIINWLDK	10	652.821	2	Anatase_10x_LA_1_f10498	Anatase	10x	LA	1	0	3.07	3.134	0.419	0.419
sp|P78316|NOP14_HUMAN	CNHPSLAEGNK	11	613.784	2	Anatase_10x_LA_1_f10498	Anatase	10x	LA	1	0	1.99	2.562	0.28	0.28
sp|Q13523|PRP4B_HUMAN	CNILHADIKPDNILVNESK	19	549.04	4	Anatase_10x_LA_1_f10498	Anatase	10x	LA	1	0	2.87	2.833	0.417	0.417
sp|Q86XP1|DGKH_HUMAN	CPESLTRDTAT#EIAINVK	18	700.003	3	Anatase_10x_LA_1_f10498	Anatase	10x	LA	1	1	2.19	2.336	0.044	0.167
sp|Q147X3|NAA30_HUMAN	CPFPAGAALACCS#EDEEDDEEHEGGGSR	28	1044.72	3	Anatase_10x_LA_1_f10498	Anatase	10x	LA	1	1	2.86	2.858	0.413	0.413
sp|P50897|PPT1_HUMAN	CPGESSHICDFIRK	14	569.266	3	Anatase_10x_LA_1_f10498	Anatase	10x	LA	1	0	2.26	2.917	0.507	0.507
sp|P50897|PPT1_HUMAN	CPGESSHICDFIRK	14	427.201	4	Anatase_10x_LA_1_f10498	Anatase	10x	LA	1	0	1.74	2.44	0.411	0.411
sp|P48449|ERG7_HUMAN	CPHVTEHIPR	10	415.878	3	Anatase_10x_LA_1_f10498	Anatase	10x	LA	1	0	2.02	2.78	0.477	0.477
sp|P39687|AN32A_HUMAN	CPNLTHLNLSGNK	13	489.918	3	Anatase_10x_LA_1_f10498	Anatase	10x	LA	1	0	1.53	4.398	0.515	0.515
sp|P39687|AN32A_HUMAN	CPNLTHLNLSGNK	13	734.374	2	Anatase_10x_LA_1_f10498	Anatase	10x	LA	1	0	1.84	3.67	0.41	0.41
sp|P48507|GSH0_HUMAN	CPSTHSEELHDCIQK	15	614.272	3	Anatase_10x_LA_1_f10498	Anatase	10x	LA	1	0	3.05	3.117	0.354	0.354
sp|P0DMV8|HS71A_HUMAN	CQEVISWLDANTLAEKDEFEHK	22	888.088	3	Anatase_10x_LA_1_f10498	Anatase	10x	LA	1	0	1.92	2.961	0.264	0.264
sp|Q96AE4|FUBP1_HUMAN	CQHAAEIITDLLR	13	513.938	3	Anatase_10x_LA_1_f10498	Anatase	10x	LA	1	0	3.05	3.571	0.227	0.227
sp|Q96I24|FUBP3_HUMAN	CQHAAHIISELILTAQER	18	697.366	3	Anatase_10x_LA_1_f10498	Anatase	10x	LA	1	0	0.72	3.533	0.421	0.421
sp|Q96I24|FUBP3_HUMAN	CQHAAHIISELILTAQER	18	523.277	4	Anatase_10x_LA_1_f10498	Anatase	10x	LA	1	0	3.01	2.579	0.343	0.343
sp|Q9C0K0|BC11B_HUMAN	CQLCDHACSQASK	13	782.821	2	Anatase_10x_LA_1_f10498	Anatase	10x	LA	1	0	2.63	4.203	0.635	0.635
sp|O60763|USO1_HUMAN	CQNEQLQTAVTQQVSQIQQHK	21	832.749	3	Anatase_10x_LA_1_f10498	Anatase	10x	LA	1	0	2.96	5.869	0.635	0.635
sp|P20700|LMNB1_HUMAN	CQSLTEDLEFRK	12	509.25	3	Anatase_10x_LA_1_f10498	Anatase	10x	LA	1	0	2.09	2.883	0.425	0.425
sp|Q9BPX3|CND3_HUMAN	CQTAEADS#ES#DHEVPEPESEMK	22	888.986	3	Anatase_10x_LA_1_f10498	Anatase	10x	LA	1	1	2.67	3.311	0.241	0.432
sp|P43243|MATR3_HUMAN	CRDDSFFGETSHNYHK	16	667.285	3	Anatase_10x_LA_1_f10498	Anatase	10x	LA	1	0	2.96	3.771	0.515	0.515
sp|P43243|MATR3_HUMAN	CRDDSFFGETSHNYHK	16	400.774	5	Anatase_10x_LA_1_f10498	Anatase	10x	LA	1	0	2.22	2.003	0.18	0.18
sp|P43243|MATR3_HUMAN	CRDDSFFGETSHNYHK	16	1000.42	2	Anatase_10x_LA_1_f10498	Anatase	10x	LA	1	0	-0.96	3.611	0.463	0.463
sp|Q15813|TBCE_HUMAN	CRHPTGGSFIRPNK	14	542.949	3	Anatase_10x_LA_1_f10498	Anatase	10x	LA	1	0	2.11	2.911	0.408	0.408
sp|Q9UQ35|SRRM2_HUMAN	CRS#PGM*LEPLGSSR	14	821.859	2	Anatase_10x_LA_1_f10498	Anatase	10x	LA	1	1	2.31	1.895	0.174	0.174
sp|Q9UQ35|SRRM2_HUMAN	CRS#PGMLEPLGSSR	14	813.862	2	Anatase_10x_LA_1_f10498	Anatase	10x	LA	1	1	2.62	2.413	0.428	0.428
sp|Q9NX63|MIC19_HUMAN	CSALATQYMHCVNHAK	16	630.953	3	Anatase_10x_LA_1_f10498	Anatase	10x	LA	1	0	2.08	3.165	0.397	0.397
sp|Q9NX63|MIC19_HUMAN	CSALATQYMHCVNHAK	16	945.927	2	Anatase_10x_LA_1_f10498	Anatase	10x	LA	1	0	2.7	2.376	0.444	0.444
sp|Q96EV2|RBM33_HUMAN	CSATPSAQVKPIVSAS#PPSR	20	1060.52	2	Anatase_10x_LA_1_f10498	Anatase	10x	LA	1	1	4.13	2.26	0.175	0.288
sp|Q15365|PCBP1_HUMAN	CSDAAGYPHATHDLEGPPLDAYSIQGQHTIS#PLDLAK	37	1007.22	4	Anatase_10x_LA_1_f10498	Anatase	10x	LA	1	1	2.44	6.39	0.024	0.384
sp|Q15365|PCBP1_HUMAN	CSDAAGYPHATHDLEGPPLDAYSIQGQHTISPLDLAK	37	987.227	4	Anatase_10x_LA_1_f10498	Anatase	10x	LA	1	0	3.66	7.001	0.568	0.568
sp|Q15365|PCBP1_HUMAN	CSDAAGYPHATHDLEGPPLDAYSIQGQHTISPLDLAK	37	1315.97	3	Anatase_10x_LA_1_f10498	Anatase	10x	LA	1	0	2.94	5.314	0.461	0.461
sp|Q9Y478|AAKB1_HUMAN	CSDVSELSSSPPGPY#HQEPYVCKPEER	27	1072.12	3	Anatase_10x_LA_1_f10498	Anatase	10x	LA	1	1	2.15	3.133	0.001	0.31
sp|P27695|APEX1_HUMAN	CSENKLPAELQELPGLSHQYWSAPSDK	27	771.878	4	Anatase_10x_LA_1_f10498	Anatase	10x	LA	1	0	6.07	4.321	0.245	0.245
sp|P21333|FLNA_HUMAN	CSGPGLS#PGMVR	12	649.277	2	Anatase_10x_LA_1_f10498	Anatase	10x	LA	1	1	2.52	1.855	0.341	0.341
sp|Q9NPA2|MMP25_HUMAN	CSLPDVLGVAGLVRR	15	537.974	3	Anatase_10x_LA_1_f10498	Anatase	10x	LA	1	0	5.55	2.42	0.317	0.317
sp|Q86XZ4|SPAS2_HUMAN	CSS#VTSVSLSSPS#DASAASS#STCASPPSLTSANKK	35	1219.5	3	Anatase_10x_LA_1_f10498	Anatase	10x	LA	1	1	5.26	1.661	0.003	0.456
sp|Q9P258|RCC2_HUMAN	CSSSSGGGS#S#GDEDGLELDGAPGGGK	26	1250.45	2	Anatase_10x_LA_1_f10498	Anatase	10x	LA	1	1	1.63	1.573	0.108	0.714
sp|P60981|DEST_HUMAN	CSTPEEIKK	9	546.275	2	Anatase_10x_LA_1_f10498	Anatase	10x	LA	1	0	2.32	1.872	0.459	0.459
sp|P11586|C1TC_HUMAN	CTHWAEGGK	9	523.231	2	Anatase_10x_LA_1_f10498	Anatase	10x	LA	1	0	1.95	1.919	0.291	0.291
sp|Q9GZN8|CT027_HUMAN	CVGAELEYDS#EHSDWHGFD	19	1166.93	2	Anatase_10x_LA_1_f10498	Anatase	10x	LA	1	1	2.63	2.491	0.033	0.429
sp|P07737|PROF1_HUMAN	CYEMASHLR	9	583.759	2	Anatase_10x_LA_1_f10498	Anatase	10x	LA	1	0	1.52	1.907	0.201	0.201
sp|P07737|PROF1_HUMAN	CYEMASHLR	9	389.508	3	Anatase_10x_LA_1_f10498	Anatase	10x	LA	1	0	1.09	1.693	0.231	0.231
sp|P62633|CNBP_HUMAN	CYSCGEFGHIQK	12	495.881	3	Anatase_10x_LA_1_f10498	Anatase	10x	LA	1	0	1.89	2.947	0.471	0.471
sp|P62633|CNBP_HUMAN	CYSCGEFGHIQK	12	743.318	2	Anatase_10x_LA_1_f10498	Anatase	10x	LA	1	0	2.54	2.872	0.511	0.511
sp|P62633|CNBP_HUMAN	CYSCGEFGHIQK	12	743.318	2	Anatase_10x_LA_1_f10498	Anatase	10x	LA	1	0	2.54	2.821	0.397	0.397
sp|Q96F24|NRBF2_HUMAN	DAAAHLQTSHKPSAEDAEGQSPLSQK	26	676.582	4	Anatase_10x_LA_1_f10498	Anatase	10x	LA	1	0	3	3.562	0.259	0.259
sp|Q96F24|NRBF2_HUMAN	DAAAHLQTSHKPSAEDAEGQSPLSQK	26	901.773	3	Anatase_10x_LA_1_f10498	Anatase	10x	LA	1	0	3.27	4.857	0.504	0.504
sp|O75874|IDHC_HUMAN	DAAEAIKK	8	423.241	2	Anatase_10x_LA_1_f10498	Anatase	10x	LA	1	0	1.97	2.184	0.126	0.126
sp|Q9BXP5|SRRT_HUMAN	DAAGLECKPRPLHK	14	531.285	3	Anatase_10x_LA_1_f10498	Anatase	10x	LA	1	0	2.42	2.134	0.195	0.195
sp|Q9BXP5|SRRT_HUMAN	DAAGLECKPRPLHK	14	796.425	2	Anatase_10x_LA_1_f10498	Anatase	10x	LA	1	0	2.95	3.425	0.399	0.399
sp|P55060|XPO2_HUMAN	DAAIYLVTSLASK	13	676.38	2	Anatase_10x_LA_1_f10498	Anatase	10x	LA	1	0	4.78	3.338	0.629	0.629
sp|P20700|LMNB1_HUMAN	DAALATALGDKK	12	587.329	2	Anatase_10x_LA_1_f10498	Anatase	10x	LA	1	0	2.23	3.365	0.486	0.486
sp|Q9H0J9|PAR12_HUMAN	DAAYSHHYSK	10	393.513	3	Anatase_10x_LA_1_f10498	Anatase	10x	LA	1	0	2.38	1.359	0.229	0.229
sp|P34896|GLYC_HUMAN	DADLWSSHDK	10	587.263	2	Anatase_10x_LA_1_f10498	Anatase	10x	LA	1	0	1.86	2.599	0.435	0.435
sp|Q49A26|GLYR1_HUMAN	DADPHFHHFLLSQTEK	16	961.465	2	Anatase_10x_LA_1_f10498	Anatase	10x	LA	1	0	2.29	3.738	0.465	0.465
sp|Q49A26|GLYR1_HUMAN	DADPHFHHFLLSQTEK	16	641.313	3	Anatase_10x_LA_1_f10498	Anatase	10x	LA	1	0	2.5	3.732	0.546	0.546
sp|Q49A26|GLYR1_HUMAN	DADPHFHHFLLSQTEK	16	481.236	4	Anatase_10x_LA_1_f10498	Anatase	10x	LA	1	0	1.98	2.141	0.303	0.303
sp|P53621|COPA_HUMAN	DADSQNPDAPEGK	13	672.291	2	Anatase_10x_LA_1_f10498	Anatase	10x	LA	1	0	3.27	3.307	0.488	0.488
sp|P53621|COPA_HUMAN	DADSQNPDAPEGK	13	672.291	2	Anatase_10x_LA_1_f10498	Anatase	10x	LA	1	0	2.98	3.548	0.395	0.395
sp|O75494|SRS10_HUMAN	DAEDALHNLDRK	12	466.233	3	Anatase_10x_LA_1_f10498	Anatase	10x	LA	1	0	1.77	2.162	0.29	0.29
sp|O75494|SRS10_HUMAN	DAEDALHNLDRK	12	698.846	2	Anatase_10x_LA_1_f10498	Anatase	10x	LA	1	0	2.31	2.037	0.264	0.264
sp|Q01130|SRSF2_HUMAN	DAEDAMDAMDGAVLDGR	17	876.368	2	Anatase_10x_LA_1_f10498	Anatase	10x	LA	1	0	3.94	3.361	0.485	0.485
sp|P27707|DCK_HUMAN	DAEKPVLFFER	11	450.907	3	Anatase_10x_LA_1_f10498	Anatase	10x	LA	1	0	1.66	2.907	0.347	0.347
sp|Q9Y266|NUDC_HUMAN	DAENHEAQLK	10	577.777	2	Anatase_10x_LA_1_f10498	Anatase	10x	LA	1	0	1.91	2.761	0.435	0.435
sp|Q9Y266|NUDC_HUMAN	DAENHEAQLK	10	385.52	3	Anatase_10x_LA_1_f10498	Anatase	10x	LA	1	0	1.48	1.537	0.224	0.224
sp|P04818|TYSY_HUMAN	DAEPRPPHGELQYLGQIQHILR	22	642.594	4	Anatase_10x_LA_1_f10498	Anatase	10x	LA	1	0	2.57	4.498	0.6	0.6
sp|P04818|TYSY_HUMAN	DAEPRPPHGELQYLGQIQHILR	22	856.456	3	Anatase_10x_LA_1_f10498	Anatase	10x	LA	1	0	2.42	7.021	0.673	0.673
sp|P04818|TYSY_HUMAN	DAEPRPPHGELQYLGQIQHILR	22	514.276	5	Anatase_10x_LA_1_f10498	Anatase	10x	LA	1	0	1.97	3.13	0.376	0.376
sp|P04818|TYSY_HUMAN	DAEPRPPHGELQYLGQIQHILR	22	642.597	4	Anatase_10x_LA_1_f10498	Anatase	10x	LA	1	0	7.78	5.037	0.622	0.622
sp|P04818|TYSY_HUMAN	DAEPRPPHGELQYLGQIQHILR	22	856.454	3	Anatase_10x_LA_1_f10498	Anatase	10x	LA	1	0	-0.04	3.944	0.402	0.402
sp|P04818|TYSY_HUMAN	DAEPRPPHGELQYLGQIQHILR	22	642.597	4	Anatase_10x_LA_1_f10498	Anatase	10x	LA	1	0	6.46	3.493	0.379	0.379
sp|Q9UPP1|PHF8_HUMAN	DAEYIYPSLES#DDDDPALK	19	1118.47	2	Anatase_10x_LA_1_f10498	Anatase	10x	LA	1	1	3.17	2.164	0.22	0.332
sp|Q9UPP1|PHF8_HUMAN	DAEYIYPSLES#DDDDPALK	19	1118.47	2	Anatase_10x_LA_1_f10498	Anatase	10x	LA	1	1	3.57	2.429	0.155	0.415
sp|P42331|RHG25_HUMAN	DAFDAGERPSFDRDTDVHTVASLLK	25	691.342	4	Anatase_10x_LA_1_f10498	Anatase	10x	LA	1	0	3.18	2.743	0.336	0.336
sp|O15182|CETN3_HUMAN	DAFELFDTDKDEAIDYHELK	20	805.376	3	Anatase_10x_LA_1_f10498	Anatase	10x	LA	1	0	4.42	5.832	0.55	0.55
sp|O15182|CETN3_HUMAN	DAFELFDTDKDEAIDYHELK	20	805.376	3	Anatase_10x_LA_1_f10498	Anatase	10x	LA	1	0	3.64	4.242	0.523	0.523
sp|P08133|ANXA6_HUMAN	DAFVAIVQSVK	11	588.837	2	Anatase_10x_LA_1_f10498	Anatase	10x	LA	1	0	3.43	2.921	0.414	0.414
sp|Q13200|PSMD2_HUMAN	DAGDKDKEQELSEEDK	16	918.408	2	Anatase_10x_LA_1_f10498	Anatase	10x	LA	1	0	-3.12	3.31	0.469	0.469
sp|Q13200|PSMD2_HUMAN	DAGDKDKEQELSEEDK	16	918.413	2	Anatase_10x_LA_1_f10498	Anatase	10x	LA	1	0	2.42	3.638	0.482	0.482
sp|Q13200|PSMD2_HUMAN	DAGDKDKEQELSEEDK	16	612.611	3	Anatase_10x_LA_1_f10498	Anatase	10x	LA	1	0	2.48	4.028	0.537	0.537
sp|P21333|FLNA_HUMAN	DAGEGLLAVQITDPEGKPK	19	969.515	2	Anatase_10x_LA_1_f10498	Anatase	10x	LA	1	0	2.69	2.877	0.288	0.288
sp|P21333|FLNA_HUMAN	DAGEGLLAVQITDPEGKPK	19	646.679	3	Anatase_10x_LA_1_f10498	Anatase	10x	LA	1	0	2.88	3.32	0.364	0.364
sp|P21333|FLNA_HUMAN	DAGEGLLAVQITDPEGKPKK	20	689.378	3	Anatase_10x_LA_1_f10498	Anatase	10x	LA	1	0	2.6	3.485	0.549	0.549
sp|P21333|FLNA_HUMAN	DAGEGLLAVQITDPEGKPKK	20	1033.56	2	Anatase_10x_LA_1_f10498	Anatase	10x	LA	1	0	2.91	2.577	0.387	0.387
sp|P21333|FLNA_HUMAN	DAGEGLLAVQITDPEGKPKK	20	517.285	4	Anatase_10x_LA_1_f10498	Anatase	10x	LA	1	0	2.06	4.226	0.506	0.506
sp|O75369|FLNB_HUMAN	DAGEGLLAVQITDQEGKPK	19	985.018	2	Anatase_10x_LA_1_f10498	Anatase	10x	LA	1	0	3.04	5.23	0.536	0.536
sp|O75369|FLNB_HUMAN	DAGEGLLAVQITDQEGKPK	19	657.015	3	Anatase_10x_LA_1_f10498	Anatase	10x	LA	1	0	2.72	2.66	0.383	0.383
sp|Q9BVG9|PTSS2_HUMAN	DAGGPRPES#PVPAGR	15	771.859	2	Anatase_10x_LA_1_f10498	Anatase	10x	LA	1	1	2.94	2.001	0.522	0.522
sp|Q5JSP0|FGD3_HUMAN	DAGLAQHSGPQK	12	604.806	2	Anatase_10x_LA_1_f10498	Anatase	10x	LA	1	0	2.23	3.363	0.401	0.401
sp|O15067|PUR4_HUMAN	DAGLHCLELGHTGEAGPHAM*VR	22	586.779	4	Anatase_10x_LA_1_f10498	Anatase	10x	LA	1	0	1.67	3.457	0.462	0.462
sp|O15067|PUR4_HUMAN	DAGLHCLELGHTGEAGPHAM*VR	22	782.037	3	Anatase_10x_LA_1_f10498	Anatase	10x	LA	1	0	1.74	4.177	0.566	0.566
sp|O15067|PUR4_HUMAN	DAGLHCLELGHTGEAGPHAMVR	22	582.781	4	Anatase_10x_LA_1_f10498	Anatase	10x	LA	1	0	2.41	3.578	0.518	0.518
sp|O15067|PUR4_HUMAN	DAGLHCLELGHTGEAGPHAMVR	22	776.706	3	Anatase_10x_LA_1_f10498	Anatase	10x	LA	1	0	2.42	7.332	0.617	0.617
sp|O15067|PUR4_HUMAN	DAGLHCLELGHTGEAGPHAMVR	22	466.426	5	Anatase_10x_LA_1_f10498	Anatase	10x	LA	1	0	1.6	1.524	0.261	0.261
sp|O15067|PUR4_HUMAN	DAGLHCLELGHTGEAGPHAMVR	22	1164.55	2	Anatase_10x_LA_1_f10498	Anatase	10x	LA	1	0	2.37	3.754	0.558	0.558
sp|Q9NW64|RBM22_HUMAN	DAGLSFKDDMPK	12	662.318	2	Anatase_10x_LA_1_f10498	Anatase	10x	LA	1	0	2.32	2.311	0.151	0.151
sp|Q7L014|DDX46_HUMAN	DAGNFDQNKLEEEMRK	16	641.968	3	Anatase_10x_LA_1_f10498	Anatase	10x	LA	1	0	2.16	4.057	0.499	0.499
sp|Q7L014|DDX46_HUMAN	DAGNFDQNKLEEEMRK	16	962.449	2	Anatase_10x_LA_1_f10498	Anatase	10x	LA	1	0	2.49	3.607	0.457	0.457
sp|P31146|COR1A_HUMAN	DAGPLLISLK	10	513.814	2	Anatase_10x_LA_1_f10498	Anatase	10x	LA	1	0	2.2	2.46	0.603	0.603
sp|P38646|GRP75_HUMAN	DAGQISGLNVLR	12	621.845	2	Anatase_10x_LA_1_f10498	Anatase	10x	LA	1	0	2.51	2.53	0.441	0.441
sp|Q9C0C2|TB182_HUMAN	DAGRPGERGS#GGLFSPSTAHVPDGALGQR	29	977.131	3	Anatase_10x_LA_1_f10498	Anatase	10x	LA	1	1	2.54	2.481	0.214	0.242
sp|P11142|HSP7C_HUMAN	DAGTIAGLNVLR	12	600.342	2	Anatase_10x_LA_1_f10498	Anatase	10x	LA	1	0	2.54	3.287	0.376	0.376
sp|Q56VL3|OCAD2_HUMAN	DAHFPPPSK	9	498.252	2	Anatase_10x_LA_1_f10498	Anatase	10x	LA	1	0	2.6	1.743	0.125	0.125
sp|P42704|LPPRC_HUMAN	DAHLLVESK	9	506.278	2	Anatase_10x_LA_1_f10498	Anatase	10x	LA	1	0	1.68	2.791	0.243	0.243
sp|Q99613|EIF3C_HUMAN	DAHNALLDIQSSGR	14	748.878	2	Anatase_10x_LA_1_f10498	Anatase	10x	LA	1	0	2.26	3.599	0.579	0.579
sp|Q99613|EIF3C_HUMAN	DAHNALLDIQSSGR	14	499.588	3	Anatase_10x_LA_1_f10498	Anatase	10x	LA	1	0	2.07	3.647	0.343	0.343
sp|Q5THK1|PR14L_HUMAN	DAHQSHHPPLEGR	13	494.24	3	Anatase_10x_LA_1_f10498	Anatase	10x	LA	1	0	1.46	2.396	0.369	0.369
sp|Q8NAV1|PR38A_HUMAN	DAHSIHGTNPQYLVEK	16	603.637	3	Anatase_10x_LA_1_f10498	Anatase	10x	LA	1	0	2.09	4.453	0.556	0.556
sp|Q8NAV1|PR38A_HUMAN	DAHSIHGTNPQYLVEK	16	904.952	2	Anatase_10x_LA_1_f10498	Anatase	10x	LA	1	0	2.17	4.84	0.606	0.606
sp|Q92896|GSLG1_HUMAN	DAHSQGEVVSCLEK	14	779.864	2	Anatase_10x_LA_1_f10498	Anatase	10x	LA	1	0	2.32	3.604	0.563	0.563
sp|Q9BPW8|NIPS1_HUMAN	DAHSTLLSK	9	486.262	2	Anatase_10x_LA_1_f10498	Anatase	10x	LA	1	0	2.17	2.327	0.289	0.289
sp|O95479|G6PE_HUMAN	DAHSVLLSHIFHGR	14	397.965	4	Anatase_10x_LA_1_f10498	Anatase	10x	LA	1	0	1.63	2.66	0.333	0.333
sp|O43847|NRDC_HUMAN	DAIDREVEAVDSEYQLARPSDANRK	25	712.604	4	Anatase_10x_LA_1_f10498	Anatase	10x	LA	1	0	3.07	3.885	0.426	0.426
sp|O43847|NRDC_HUMAN	DAIDREVEAVDSEYQLARPSDANRK	25	712.604	4	Anatase_10x_LA_1_f10498	Anatase	10x	LA	1	0	2.43	4.765	0.5	0.5
sp|O43847|NRDC_HUMAN	DAIDREVEAVDSEYQLARPSDANRK	25	570.284	5	Anatase_10x_LA_1_f10498	Anatase	10x	LA	1	0	1.88	3.786	0.377	0.377
sp|P31948|STIP1_HUMAN	DAIHFYNK	8	504.252	2	Anatase_10x_LA_1_f10498	Anatase	10x	LA	1	0	1.7	2.317	0.263	0.263
sp|P62330|ARF6_HUMAN	DAIILIFANK	10	559.336	2	Anatase_10x_LA_1_f10498	Anatase	10x	LA	1	0	3.63	1.476	0	0.316
sp|P11586|C1TC_HUMAN	DAIKPNLM*QTLEGTPVFVHAGPFANIAHGNSSIIADR	37	980.257	4	Anatase_10x_LA_1_f10498	Anatase	10x	LA	1	0	2.25	3.153	0.357	0.357
sp|Q6UB35|C1TM_HUMAN	DAIKPNLM*QTLEGTPVFVHAGPFANIAHGNSSVLADK	37	969.754	4	Anatase_10x_LA_1_f10498	Anatase	10x	LA	1	0	4.73	5.51	0.616	0.616
sp|Q6UB35|C1TM_HUMAN	DAIKPNLM*QTLEGTPVFVHAGPFANIAHGNSSVLADK	37	969.755	4	Anatase_10x_LA_1_f10498	Anatase	10x	LA	1	0	6.04	5.554	0.569	0.569
sp|Q6UB35|C1TM_HUMAN	DAIKPNLMQTLEGTPVFVHAGPFANIAHGNSSVLADK	37	965.753	4	Anatase_10x_LA_1_f10498	Anatase	10x	LA	1	0	3.07	4.957	0.387	0.387
sp|Q9UHB9|SRP68_HUMAN	DAIQVVREELKPDQK	15	589.993	3	Anatase_10x_LA_1_f10498	Anatase	10x	LA	1	0	2.13	3.019	0.478	0.478
sp|Q9UHB9|SRP68_HUMAN	DAIQVVREELKPDQK	15	884.485	2	Anatase_10x_LA_1_f10498	Anatase	10x	LA	1	0	2.1	2.413	0.249	0.249
sp|Q13325|IFIT5_HUMAN	DALECLEQAEEIIQQEHSDKEEVR	24	725.341	4	Anatase_10x_LA_1_f10498	Anatase	10x	LA	1	0	-0.02	2.643	0.289	0.289
sp|P47974|TISD_HUMAN	DALHLGFPREPRPK	14	408.98	4	Anatase_10x_LA_1_f10498	Anatase	10x	LA	1	0	1.45	2.137	0.475	0.475
sp|Q9H9Y6|RPA2_HUMAN	DALLAHGTSFLLHDR	15	555.963	3	Anatase_10x_LA_1_f10498	Anatase	10x	LA	1	0	2.51	4.762	0.635	0.635
##sp|Q9UBT7|CTNL1_HUMAN	DALLLVKTVSSLLLR	15	547.69	3	Anatase_10x_LA_1_f10498	Anatase	10x	LA	1	0	15.5	1.469	0.76	0.76
sp|Q01082|SPTB2_HUMAN	DALLSALSIQNYHLECNETK	20	773.717	3	Anatase_10x_LA_1_f10498	Anatase	10x	LA	1	0	3.85	2.57	0.32	0.32
sp|Q14241|ELOA1_HUMAN	DALQKEEEMEGDYQETWK	18	743.661	3	Anatase_10x_LA_1_f10498	Anatase	10x	LA	1	0	1.54	2.082	0.193	0.193
sp|Q14008|CKAP5_HUMAN	DALRPPLQNINSVQLK	16	602.681	3	Anatase_10x_LA_1_f10498	Anatase	10x	LA	1	0	2.86	4.147	0.64	0.64
sp|P78316|NOP14_HUMAN	DAMHEMEEMIETK	13	797.335	2	Anatase_10x_LA_1_f10498	Anatase	10x	LA	1	0	1.89	2.516	0.364	0.364
sp|P78316|NOP14_HUMAN	DAMHEMEEMIETK	13	531.892	3	Anatase_10x_LA_1_f10498	Anatase	10x	LA	1	0	2.01	3.271	0.48	0.48
sp|O94906|PRP6_HUMAN	DANDPVDDRHAPPGK	15	802.379	2	Anatase_10x_LA_1_f10498	Anatase	10x	LA	1	0	2.81	3.122	0.433	0.433
sp|O94906|PRP6_HUMAN	DANDPVDDRHAPPGK	15	535.255	3	Anatase_10x_LA_1_f10498	Anatase	10x	LA	1	0	2.25	2.737	0.39	0.39
sp|Q9BV19|CA050_HUMAN	DANLHHVACNIVK	13	497.59	3	Anatase_10x_LA_1_f10498	Anatase	10x	LA	1	0	1.5	3.253	0.449	0.449
sp|Q9BV19|CA050_HUMAN	DANLHHVACNIVK	13	745.882	2	Anatase_10x_LA_1_f10498	Anatase	10x	LA	1	0	2.48	3.115	0.455	0.455
sp|Q15717|ELAV1_HUMAN	DANLYISGLPR	11	609.829	2	Anatase_10x_LA_1_f10498	Anatase	10x	LA	1	0	2.2	2.995	0.497	0.497
sp|Q9Y6E2|BZW2_HUMAN	DANSVTSSLRK	11	589.314	2	Anatase_10x_LA_1_f10498	Anatase	10x	LA	1	0	2.87	2.033	0.347	0.347
sp|Q9H2P0|ADNP_HUMAN	DAPAESVAYHAQNNPPVPPKPQPK	24	851.438	3	Anatase_10x_LA_1_f10498	Anatase	10x	LA	1	0	3.76	4.332	0.463	0.463
sp|Q9H2P0|ADNP_HUMAN	DAPAESVAYHAQNNPPVPPKPQPK	24	851.437	3	Anatase_10x_LA_1_f10498	Anatase	10x	LA	1	0	2.58	4.962	0.465	0.465
sp|Q9H2P0|ADNP_HUMAN	DAPAESVAYHAQNNPPVPPKPQPK	24	851.436	3	Anatase_10x_LA_1_f10498	Anatase	10x	LA	1	0	1.21	3.332	0.378	0.378
sp|P21333|FLNA_HUMAN	DAPQDFHPDRVK	12	712.851	2	Anatase_10x_LA_1_f10498	Anatase	10x	LA	1	0	2.34	2.751	0.398	0.398
sp|Q15003|CND2_HUMAN	DAPSLEEVEGHVADGSATEM*GTTKK	25	859.068	3	Anatase_10x_LA_1_f10498	Anatase	10x	LA	1	0	2.63	3.47	0.419	0.419
sp|Q15003|CND2_HUMAN	DAPSLEEVEGHVADGSATEMGTTKK	25	853.737	3	Anatase_10x_LA_1_f10498	Anatase	10x	LA	1	0	2.75	3.162	0.528	0.528
sp|Q04726|TLE3_HUMAN	DAPTS#PASVASSSSTPSSK	19	922.403	2	Anatase_10x_LA_1_f10498	Anatase	10x	LA	1	1	2.16	1.916	0.093	0.204
sp|Q7Z5K2|WAPL_HUMAN	DAPTTQHDKS#GEWQETSGEIQWVSTEK	27	1052.13	3	Anatase_10x_LA_1_f10498	Anatase	10x	LA	1	1	1.96	2.917	0.203	0.353
sp|Q7Z5K2|WAPL_HUMAN	DAPTTQHDKS#GEWQETSGEIQWVSTEK	27	1052.13	3	Anatase_10x_LA_1_f10498	Anatase	10x	LA	1	1	1.59	3.844	0.072	0.507
sp|P78549|NTH_HUMAN	DAPVDHLGTEHCYDSSAPPK	20	732.661	3	Anatase_10x_LA_1_f10498	Anatase	10x	LA	1	0	1.56	2.608	0.383	0.383
sp|P78549|NTH_HUMAN	DAPVDHLGTEHCYDSSAPPK	20	732.661	3	Anatase_10x_LA_1_f10498	Anatase	10x	LA	1	0	1.53	2.717	0.358	0.358
sp|Q14683|SMC1A_HUMAN	DAQAEEEIKQEMNTLQQK	18	711.678	3	Anatase_10x_LA_1_f10498	Anatase	10x	LA	1	0	2.92	5.795	0.523	0.523
sp|Q14683|SMC1A_HUMAN	DAQAEEEIKQEMNTLQQK	18	1067.01	2	Anatase_10x_LA_1_f10498	Anatase	10x	LA	1	0	3.53	4.607	0.585	0.585
sp|P40938|RFC3_HUMAN	DAQHALRR	8	483.766	2	Anatase_10x_LA_1_f10498	Anatase	10x	LA	1	0	1.97	1.726	0.248	0.248
sp|Q14697|GANAB_HUMAN	DAQHYGGWEHR	11	452.535	3	Anatase_10x_LA_1_f10498	Anatase	10x	LA	1	0	2.04	4.022	0.498	0.498
sp|Q14697|GANAB_HUMAN	DAQHYGGWEHR	11	678.299	2	Anatase_10x_LA_1_f10498	Anatase	10x	LA	1	0	1.8	2.151	0.434	0.434
sp|Q96T23|RSF1_HUMAN	DAQRLS#PIPEEVPK	14	829.913	2	Anatase_10x_LA_1_f10498	Anatase	10x	LA	1	1	2.56	3.101	0.29	0.29
sp|Q96QZ7|MAGI1_HUMAN	DARPSSPADVASNSSHGY#PNDTVSLASSIATQPELITVHIVK	42	1103.79	4	Anatase_10x_LA_1_f10498	Anatase	10x	LA	1	1	3.59	4.048	0.014	0.361
sp|P78371|TCPB_HUMAN	DASLMVTNDGATILK	15	774.903	2	Anatase_10x_LA_1_f10498	Anatase	10x	LA	1	0	3.58	2.671	0.439	0.439
sp|P17600|SYN1_HUMAN	DASPGRGS#HGQTPSPGALPLGR	22	732.351	3	Anatase_10x_LA_1_f10498	Anatase	10x	LA	1	1	1.86	2.841	0.036	0.326
sp|Q04724|TLE1_HUMAN	DASSS#PASTASSASSTSLK	19	911.395	2	Anatase_10x_LA_1_f10498	Anatase	10x	LA	1	1	3.73	2.124	0.016	0.289
sp|Q15154|PCM1_HUMAN	DAST#SPPNRETIGSAQCK	18	999.936	2	Anatase_10x_LA_1_f10498	Anatase	10x	LA	1	1	2.88	2.577	0.009	0.541
sp|P0CH99|Z705D_HUMAN	DASTSM*TMENSLILEDPFEYNDS#GEDCTHSS#TITQCLLTHSGK	43	1250.25	4	Anatase_10x_LA_1_f10498	Anatase	10x	LA	1	1	-4.46	1.761	0.03	0.957
sp|P06733|ENOA_HUMAN	DATNVGDEGGFAPNILENK	19	980.969	2	Anatase_10x_LA_1_f10498	Anatase	10x	LA	1	0	2.79	4.325	0.499	0.499
sp|P18085|ARF4_HUMAN	DAVLLLFANK	10	552.328	2	Anatase_10x_LA_1_f10498	Anatase	10x	LA	1	0	3.03	1.93	0.405	0.405
sp|P84077|ARF1_HUMAN	DAVLLVFANK	10	545.32	2	Anatase_10x_LA_1_f10498	Anatase	10x	LA	1	0	1.94	2.193	0.349	0.349
sp|Q8TDP1|RNH2C_HUMAN	DAVPATLHLLPCEVAVDGPAPVGR	24	818.769	3	Anatase_10x_LA_1_f10498	Anatase	10x	LA	1	0	4.92	3.25	0.5	0.5
sp|P16298|PP2BB_HUMAN	DAVQQDGFNSLNTAHATENHGTGNHTAQ	28	979.106	3	Anatase_10x_LA_1_f10498	Anatase	10x	LA	1	0	2.45	3.881	0.363	0.363
sp|P49720|PSB3_HUMAN	DAVSGMGVIVHIIEK	15	523.29	3	Anatase_10x_LA_1_f10498	Anatase	10x	LA	1	0	3.36	1.767	0.337	0.337
sp|P62805|H4_HUMAN	DAVTYTEHAK	10	567.776	2	Anatase_10x_LA_1_f10498	Anatase	10x	LA	1	0	2.34	2.684	0.593	0.593
sp|P62805|H4_HUMAN	DAVTYTEHAK	10	378.853	3	Anatase_10x_LA_1_f10498	Anatase	10x	LA	1	0	1.74	1.77	0.478	0.478
sp|P62805|H4_HUMAN	DAVTYTEHAKR	11	430.887	3	Anatase_10x_LA_1_f10498	Anatase	10x	LA	1	0	1.99	1.637	0.245	0.245
sp|P62805|H4_HUMAN	DAVTYTEHAKR	11	645.827	2	Anatase_10x_LA_1_f10498	Anatase	10x	LA	1	0	2.7	2.603	0.413	0.413
sp|P08133|ANXA6_HUMAN	DAYERDLEADIIGDTSGHFQK	21	595.784	4	Anatase_10x_LA_1_f10498	Anatase	10x	LA	1	0	3.42	3.241	0.236	0.236
sp|P08133|ANXA6_HUMAN	DAYERDLEADIIGDTSGHFQK	21	794.043	3	Anatase_10x_LA_1_f10498	Anatase	10x	LA	1	0	4.11	5.466	0.462	0.462
sp|P08133|ANXA6_HUMAN	DAYERDLEADIIGDTSGHFQK	21	1190.56	2	Anatase_10x_LA_1_f10498	Anatase	10x	LA	1	0	3.3	4.749	0.579	0.579
sp|P08133|ANXA6_HUMAN	DAYERDLEADIIGDTSGHFQK	21	794.043	3	Anatase_10x_LA_1_f10498	Anatase	10x	LA	1	0	3.55	3.044	0.305	0.305
sp|O15079|SNPH_HUMAN	DAYGTSSLS#S#SSNSGS#YKGSDSSPTPRR	28	1026.73	3	Anatase_10x_LA_1_f10498	Anatase	10x	LA	1	1	-1.22	1.751	0.016	0.568
sp|Q07960|RHG01_HUMAN	DAYREFDRK	9	400.532	3	Anatase_10x_LA_1_f10498	Anatase	10x	LA	1	0	1.22	2.547	0.38	0.38
sp|Q07960|RHG01_HUMAN	DAYREFDRK	9	600.295	2	Anatase_10x_LA_1_f10498	Anatase	10x	LA	1	0	1.87	1.518	0.203	0.203
sp|Q9UPN3|MACF1_HUMAN	DAYRPTTDADKIEDEVTR	18	1048	2	Anatase_10x_LA_1_f10498	Anatase	10x	LA	1	0	3.3	2.34	0.459	0.459
sp|Q9UPN3|MACF1_HUMAN	DAYRPTTDADKIEDEVTR	18	699.004	3	Anatase_10x_LA_1_f10498	Anatase	10x	LA	1	0	2.08	3.432	0.314	0.314
sp|P28074|PSB5_HUMAN	DAYSGGAVNLYHVR	14	761.378	2	Anatase_10x_LA_1_f10498	Anatase	10x	LA	1	0	3.23	3.341	0.501	0.501
sp|P60900|PSA6_HUMAN	DCAVIVTQK	9	517.272	2	Anatase_10x_LA_1_f10498	Anatase	10x	LA	1	0	1.62	2.323	0.291	0.291
sp|Q96HE7|ERO1A_HUMAN	DCAVKPCQSDEVPDGIK	17	639.962	3	Anatase_10x_LA_1_f10498	Anatase	10x	LA	1	0	2.06	2.666	0.316	0.316
sp|Q9BSF4|CS052_HUMAN	DCDINDDEFLHLPAHLR	17	693.991	3	Anatase_10x_LA_1_f10498	Anatase	10x	LA	1	0	2.2	1.614	0.22	0.22
sp|P62633|CNBP_HUMAN	DCDLQEDACYNCGR	14	888.327	2	Anatase_10x_LA_1_f10498	Anatase	10x	LA	1	0	2.52	4.672	0.624	0.624
sp|P31948|STIP1_HUMAN	DCEECIQLEPTFIK	14	891.409	2	Anatase_10x_LA_1_f10498	Anatase	10x	LA	1	0	1.31	3.853	0.419	0.419
sp|Q9NWH9|SLTM_HUMAN	DCELENQEAHEQDGNDELKDSEEFGENEEENVHSK	35	1033.93	4	Anatase_10x_LA_1_f10498	Anatase	10x	LA	1	0	2.83	6.688	0.659	0.659
sp|Q9NWH9|SLTM_HUMAN	DCELENQEAHEQDGNDELKDSEEFGENEEENVHSK	35	1378.23	3	Anatase_10x_LA_1_f10498	Anatase	10x	LA	1	0	1.82	4.315	0.504	0.504
sp|P35219|CAH8_HUMAN	DCEVTNDGHTIQVILK	16	921.462	2	Anatase_10x_LA_1_f10498	Anatase	10x	LA	1	0	5.63	2.372	0.422	0.422
sp|Q00839|HNRPU_HUMAN	DCEVVMMIGLPGAGK	15	788.883	2	Anatase_10x_LA_1_f10498	Anatase	10x	LA	1	0	4.1	3.177	0.463	0.463
sp|Q9NUE0|ZDH18_HUMAN	DCEYQQISPGAAPLPAS#PGAR	21	1133.01	2	Anatase_10x_LA_1_f10498	Anatase	10x	LA	1	1	3.56	4.522	0.599	0.66
sp|P28331|NDUS1_HUMAN	DCFIIYQGHHGDVGAPIADVILPGAAYTEK	30	1076.53	3	Anatase_10x_LA_1_f10498	Anatase	10x	LA	1	0	-3.45	4.4	0.408	0.408
sp|P28331|NDUS1_HUMAN	DCFIIYQGHHGDVGAPIADVILPGAAYTEK	30	1076.54	3	Anatase_10x_LA_1_f10498	Anatase	10x	LA	1	0	7.46	4.86	0.456	0.456
sp|P60174|TPIS_HUMAN	DCGATWVVLGHSER	14	529.585	3	Anatase_10x_LA_1_f10498	Anatase	10x	LA	1	0	1.87	2.441	0.377	0.377
sp|P60174|TPIS_HUMAN	DCGATWVVLGHSER	14	793.875	2	Anatase_10x_LA_1_f10498	Anatase	10x	LA	1	0	2.72	2.852	0.489	0.489
sp|Q9H3P7|GCP60_HUMAN	DCHEEVYAGSHQYPGR	16	635.606	3	Anatase_10x_LA_1_f10498	Anatase	10x	LA	1	0	2.36	4.711	0.614	0.614
sp|Q9H3P7|GCP60_HUMAN	DCHEEVYAGSHQYPGR	16	952.905	2	Anatase_10x_LA_1_f10498	Anatase	10x	LA	1	0	1.99	4.319	0.598	0.598
sp|Q92833|JARD2_HUMAN	DCHVAVHCGK	10	394.844	3	Anatase_10x_LA_1_f10498	Anatase	10x	LA	1	0	3.8	2.227	0.145	0.145
sp|Q9UI26|IPO11_HUMAN	DCMLMSHLEEPKVTEDEEPPTEQDK	25	996.438	3	Anatase_10x_LA_1_f10498	Anatase	10x	LA	1	0	1.68	4.507	0.418	0.418
sp|Q9UI26|IPO11_HUMAN	DCMLMSHLEEPKVTEDEEPPTEQDK	25	996.438	3	Anatase_10x_LA_1_f10498	Anatase	10x	LA	1	0	1.62	4.519	0.401	0.401
sp|P37235|HPCL1_HUMAN	DCPTGHLTVDEFKK	14	823.898	2	Anatase_10x_LA_1_f10498	Anatase	10x	LA	1	0	2.95	3.155	0.38	0.38
sp|Q8NFF5|FAD1_HUMAN	DCTALLHLFHAAVQR	15	584.64	3	Anatase_10x_LA_1_f10498	Anatase	10x	LA	1	0	3.34	3.536	0.374	0.374
sp|P00558|PGK1_HUMAN	DCVGPEVEK	9	516.738	2	Anatase_10x_LA_1_f10498	Anatase	10x	LA	1	0	2.12	1.827	0.264	0.264
sp|Q96H79|ZCCHL_HUMAN	DCWSTCTLSHDIHTPVNMQVLK	22	881.413	3	Anatase_10x_LA_1_f10498	Anatase	10x	LA	1	0	3.33	4.365	0.464	0.464
sp|Q8N0Z6|TTC5_HUMAN	DCYFETHSVEDAGRK	15	605.267	3	Anatase_10x_LA_1_f10498	Anatase	10x	LA	1	0	2.52	2.797	0.504	0.504
sp|Q8N0Z6|TTC5_HUMAN	DCYFETHSVEDAGRK	15	907.397	2	Anatase_10x_LA_1_f10498	Anatase	10x	LA	1	0	2.8	2.88	0.509	0.509
sp|Q8N0Z6|TTC5_HUMAN	DCYFETHSVEDAGRK	15	454.202	4	Anatase_10x_LA_1_f10498	Anatase	10x	LA	1	0	2.17	2.089	0.328	0.328
sp|A7KAX9|RHG32_HUMAN	DCYKEEEHLTQSIVPPPKPER	21	638.818	4	Anatase_10x_LA_1_f10498	Anatase	10x	LA	1	0	2.1	2.938	0.36	0.36
sp|P10809|CH60_HUMAN	DDAMLLK	7	403.21	2	Anatase_10x_LA_1_f10498	Anatase	10x	LA	1	0	0.25	2.43	0.273	0.273
sp|P22234|PUR6_HUMAN	DDANNDPQWSEEQLIAAK	18	1022.47	2	Anatase_10x_LA_1_f10498	Anatase	10x	LA	1	0	1.66	3.826	0.421	0.421
sp|P0DJD0|RGPD1_HUMAN	DDDACKTEDSDDIHFEPVVQMPEK	24	940.74	3	Anatase_10x_LA_1_f10498	Anatase	10x	LA	1	0	3.18	3.742	0.329	0.329
sp|P0DJD0|RGPD1_HUMAN	DDDACKTEDSDDIHFEPVVQMPEK	24	940.74	3	Anatase_10x_LA_1_f10498	Anatase	10x	LA	1	0	3.18	4.014	0.495	0.495
##sp|Q96MC4|C295L_HUMAN	DDDALSTGSPSTTSLESGREREQAR	25	889.084	3	Anatase_10x_LA_1_f10498	Anatase	10x	LA	1	0	3.01	2.267	0.296	0.296
sp|P49792|RBP2_HUMAN	DDDAYKTEDSDDIHFEPVVQM*PEK	24	947.082	3	Anatase_10x_LA_1_f10498	Anatase	10x	LA	1	0	2.45	3.048	0.432	0.432
sp|P49792|RBP2_HUMAN	DDDAYKTEDSDDIHFEPVVQMPEK	24	941.751	3	Anatase_10x_LA_1_f10498	Anatase	10x	LA	1	0	3.38	5.349	0.58	0.58
sp|P49792|RBP2_HUMAN	DDDAYKTEDSDDIHFEPVVQMPEK	24	706.565	4	Anatase_10x_LA_1_f10498	Anatase	10x	LA	1	0	2.99	4.306	0.403	0.403
sp|P24534|EF1B_HUMAN	DDDDIDLFGS#DDEEESEEAK	20	1176.93	2	Anatase_10x_LA_1_f10498	Anatase	10x	LA	1	1	3.24	4.13	0.246	0.646
sp|A0AVT1|UBA6_HUMAN	DDDHNGHIDFITAASNLR	18	670.982	3	Anatase_10x_LA_1_f10498	Anatase	10x	LA	1	0	2.97	3.928	0.457	0.457
sp|A0AVT1|UBA6_HUMAN	DDDHNGHIDFITAASNLR	18	503.488	4	Anatase_10x_LA_1_f10498	Anatase	10x	LA	1	0	2.25	2.999	0.269	0.269
sp|Q14696|MESD_HUMAN	DDDIEEGDLPEHK	13	756.33	2	Anatase_10x_LA_1_f10498	Anatase	10x	LA	1	0	2.57	3.32	0.584	0.584
sp|Q14696|MESD_HUMAN	DDDIEEGDLPEHK	13	504.556	3	Anatase_10x_LA_1_f10498	Anatase	10x	LA	1	0	2.1	2.804	0.404	0.404
sp|O95159|ZFPL1_HUMAN	DDDRTPGLHGDCDDDK	16	915.866	2	Anatase_10x_LA_1_f10498	Anatase	10x	LA	1	0	2.5	3.611	0.541	0.541
sp|O95159|ZFPL1_HUMAN	DDDRTPGLHGDCDDDK	16	610.912	3	Anatase_10x_LA_1_f10498	Anatase	10x	LA	1	0	1.8	2.789	0.354	0.354
sp|O95159|ZFPL1_HUMAN	DDDRTPGLHGDCDDDKYR	18	538.228	4	Anatase_10x_LA_1_f10498	Anatase	10x	LA	1	0	2.51	3.186	0.365	0.365
sp|P22314|UBA1_HUMAN	DDDSNFHMDFIVAASNLR	18	689.649	3	Anatase_10x_LA_1_f10498	Anatase	10x	LA	1	0	4.13	4.195	0.391	0.391
sp|P22314|UBA1_HUMAN	DDDSNFHMDFIVAASNLR	18	1033.97	2	Anatase_10x_LA_1_f10498	Anatase	10x	LA	1	0	5.91	3.304	0.537	0.537
sp|Q58FF8|H90B2_HUMAN	DDEEKPKIEDVGS#DEEDDSGK	21	805.992	3	Anatase_10x_LA_1_f10498	Anatase	10x	LA	1	1	2.02	3.861	0.282	0.352
sp|Q07666|KHDR1_HUMAN	DDEENYLDLFSHK	13	542.244	3	Anatase_10x_LA_1_f10498	Anatase	10x	LA	1	0	2.87	2.062	0.456	0.456
sp|P27797|CALR_HUMAN	DDEFTHLYTLIVRPDNTYEVK	21	856.762	3	Anatase_10x_LA_1_f10498	Anatase	10x	LA	1	0	3.99	4.339	0.518	0.518
sp|P27797|CALR_HUMAN	DDEFTHLYTLIVRPDNTYEVK	21	1284.64	2	Anatase_10x_LA_1_f10498	Anatase	10x	LA	1	0	7.87	3.476	0.525	0.525
sp|P27797|CALR_HUMAN	DDEFTHLYTLIVRPDNTYEVK	21	856.761	3	Anatase_10x_LA_1_f10498	Anatase	10x	LA	1	0	2.82	2.989	0.417	0.417
sp|P27797|CALR_HUMAN	DDEFTHLYTLIVRPDNTYEVK	21	856.762	3	Anatase_10x_LA_1_f10498	Anatase	10x	LA	1	0	3.26	4.069	0.453	0.453
sp|P27797|CALR_HUMAN	DDEFTHLYTLIVRPDNTYEVK	21	642.823	4	Anatase_10x_LA_1_f10498	Anatase	10x	LA	1	0	3.15	3.032	0.431	0.431
sp|Q16891|MIC60_HUMAN	DDFKRELDSITPEVLPGWK	19	749.059	3	Anatase_10x_LA_1_f10498	Anatase	10x	LA	1	0	5.32	3.369	0.285	0.285
sp|P37802|TAGL2_HUMAN	DDGLFSGDPNWFPK	14	797.866	2	Anatase_10x_LA_1_f10498	Anatase	10x	LA	1	0	4.75	3.376	0.446	0.446
sp|P37802|TAGL2_HUMAN	DDGLFSGDPNWFPKK	15	861.912	2	Anatase_10x_LA_1_f10498	Anatase	10x	LA	1	0	2.99	2.375	0.341	0.341
sp|P42336|PK3CA_HUMAN	DDGQLFHIDFGHFLDHK	17	680.993	3	Anatase_10x_LA_1_f10498	Anatase	10x	LA	1	0	4.56	2.674	0.3	0.3
sp|P42336|PK3CA_HUMAN	DDGQLFHIDFGHFLDHK	17	510.996	4	Anatase_10x_LA_1_f10498	Anatase	10x	LA	1	0	3.54	2.135	0.253	0.253
sp|Q9NYB0|TE2IP_HUMAN	DDGSSMSFYVRPS#PAK	16	912.389	2	Anatase_10x_LA_1_f10498	Anatase	10x	LA	1	1	2.33	2.423	0.333	0.333
sp|P49448|DHE4_HUMAN	DDGSWEVIEGYR	12	713.32	2	Anatase_10x_LA_1_f10498	Anatase	10x	LA	1	0	3.5	2.072	0.164	0.164
sp|Q96K17|BT3L4_HUMAN	DDGTVIHFNNPK	12	678.832	2	Anatase_10x_LA_1_f10498	Anatase	10x	LA	1	0	1.67	2.741	0.478	0.478
sp|P32942|ICAM3_HUMAN	DDHGAPFSCR	10	581.243	2	Anatase_10x_LA_1_f10498	Anatase	10x	LA	1	0	3.22	1.622	0.273	0.273
sp|Q8NEY8|PPHLN_HUMAN	DDHSAS#RQPEYR	12	514.212	3	Anatase_10x_LA_1_f10498	Anatase	10x	LA	1	1	1.99	2.088	0.027	0.372
sp|Q9Y490|TLN1_HUMAN	DDILNGSHPVSFDK	14	772.374	2	Anatase_10x_LA_1_f10498	Anatase	10x	LA	1	0	1.83	2.231	0.16	0.16
sp|P13796|PLSL_HUMAN	DDIQRAECM*LQQAER	15	626.954	3	Anatase_10x_LA_1_f10498	Anatase	10x	LA	1	0	2.83	4.283	0.392	0.392
sp|P13796|PLSL_HUMAN	DDIQRAECM*LQQAER	15	626.954	3	Anatase_10x_LA_1_f10498	Anatase	10x	LA	1	0	2.8	3.816	0.387	0.387
sp|P13796|PLSL_HUMAN	DDIQRAECM*LQQAER	15	626.954	3	Anatase_10x_LA_1_f10498	Anatase	10x	LA	1	0	2.49	3.994	0.465	0.465
sp|P13796|PLSL_HUMAN	DDIQRAECMLQQAER	15	621.623	3	Anatase_10x_LA_1_f10498	Anatase	10x	LA	1	0	2.68	4.715	0.252	0.252
sp|P13796|PLSL_HUMAN	DDIQRAECMLQQAER	15	931.93	2	Anatase_10x_LA_1_f10498	Anatase	10x	LA	1	0	2.75	4.245	0.474	0.474
sp|P13796|PLSL_HUMAN	DDIQRAECMLQQAER	15	621.623	3	Anatase_10x_LA_1_f10498	Anatase	10x	LA	1	0	2.74	4.232	0.361	0.361
sp|Q9H3S7|PTN23_HUMAN	DDITASLVTTDHSEMKK	17	630.977	3	Anatase_10x_LA_1_f10498	Anatase	10x	LA	1	0	2.74	2.034	0.261	0.261
sp|P21675|TAF1_HUMAN	DDKEPQPVKK	10	395.216	3	Anatase_10x_LA_1_f10498	Anatase	10x	LA	1	0	1.96	2.938	0.264	0.264
sp|P16615|AT2A2_HUMAN	DDKPVNCHQYDGLVELATICALCNDSALDYNEAK	34	978.696	4	Anatase_10x_LA_1_f10498	Anatase	10x	LA	1	0	2.91	5.348	0.26	0.26
sp|P16615|AT2A2_HUMAN	DDKPVNCHQYDGLVELATICALCNDSALDYNEAK	34	1304.6	3	Anatase_10x_LA_1_f10498	Anatase	10x	LA	1	0	10.04	4.887	0.565	0.565
sp|Q9Y617|SERC_HUMAN	DDLLGFALR	9	510.281	2	Anatase_10x_LA_1_f10498	Anatase	10x	LA	1	0	3.42	2.59	0.427	0.427
sp|Q92608|DOCK2_HUMAN	DDMQHQVLER	10	635.798	2	Anatase_10x_LA_1_f10498	Anatase	10x	LA	1	0	2.99	2.452	0.365	0.365
sp|Q8IW35|CEP97_HUMAN	DDNHSLTFFPESTEQK	16	947.928	2	Anatase_10x_LA_1_f10498	Anatase	10x	LA	1	0	1.47	3.076	0.362	0.362
sp|Q9HAV7|GRPE1_HUMAN	DDNPHLK	7	419.707	2	Anatase_10x_LA_1_f10498	Anatase	10x	LA	1	0	1.72	1.867	0.293	0.293
sp|Q13428|TCOF_HUMAN	DDPDGKQEAKPQQAAGM*LSPK	21	557.523	4	Anatase_10x_LA_1_f10498	Anatase	10x	LA	1	0	2.73	2.338	0.308	0.308
sp|Q13428|TCOF_HUMAN	DDPDGKQEAKPQQAAGMLSPK	21	737.697	3	Anatase_10x_LA_1_f10498	Anatase	10x	LA	1	0	2.56	3.096	0.428	0.428
sp|Q13428|TCOF_HUMAN	DDPDGKQEAKPQQAAGMLSPK	21	1106.04	2	Anatase_10x_LA_1_f10498	Anatase	10x	LA	1	0	1.9	2.663	0.438	0.438
sp|Q6UX04|CWC27_HUMAN	DDPHLSSVPVVESEKGDAPDLVDDGEDESAEHDEYIDGDEK	41	1114.23	4	Anatase_10x_LA_1_f10498	Anatase	10x	LA	1	0	2.09	5.245	0.486	0.486
sp|P39023|RL3_HUMAN	DDPSKPVHLTAFLGYK	16	596.651	3	Anatase_10x_LA_1_f10498	Anatase	10x	LA	1	0	2.62	2.878	0.59	0.59
sp|P39023|RL3_HUMAN	DDPSKPVHLTAFLGYK	16	447.74	4	Anatase_10x_LA_1_f10498	Anatase	10x	LA	1	0	1.98	2.242	0.388	0.388
sp|P39023|RL3_HUMAN	DDPSKPVHLTAFLGYK	16	596.651	3	Anatase_10x_LA_1_f10498	Anatase	10x	LA	1	0	2.93	2.006	0.322	0.322
sp|O14730|RIOK3_HUMAN	DDPYRPAKPVPTPK	14	527.62	3	Anatase_10x_LA_1_f10498	Anatase	10x	LA	1	0	2.06	1.701	0.196	0.196
sp|Q10567|AP1B1_HUMAN	DDREAQSICER	11	689.806	2	Anatase_10x_LA_1_f10498	Anatase	10x	LA	1	0	2.49	3.162	0.52	0.52
sp|Q14152|EIF3A_HUMAN	DDRVEERDPPR	11	461.893	3	Anatase_10x_LA_1_f10498	Anatase	10x	LA	1	0	2.65	1.585	0.327	0.327
sp|Q14152|EIF3A_HUMAN	DDRVEERDPPR	11	692.336	2	Anatase_10x_LA_1_f10498	Anatase	10x	LA	1	0	2.54	1.345	0.151	0.151
sp|P43243|MATR3_HUMAN	DDSFFGETSHNYHK	14	561.907	3	Anatase_10x_LA_1_f10498	Anatase	10x	LA	1	0	1.75	1.279	0.234	0.234
sp|P43243|MATR3_HUMAN	DDSFFGETSHNYHK	14	842.357	2	Anatase_10x_LA_1_f10498	Anatase	10x	LA	1	0	2.48	2.389	0.407	0.407
sp|Q32P28|P3H1_HUMAN	DDSHPVHVDNCILNAETLVCVK	22	634.557	4	Anatase_10x_LA_1_f10498	Anatase	10x	LA	1	0	3.37	2.921	0.289	0.289
sp|Q32P28|P3H1_HUMAN	DDSHPVHVDNCILNAETLVCVK	22	845.74	3	Anatase_10x_LA_1_f10498	Anatase	10x	LA	1	0	3.56	4.345	0.322	0.322
sp|Q6PL18|ATAD2_HUMAN	DDSQNAIDHKIES#DTEETQDTSVDHNETGNTGESSVEENEK	41	1154.22	4	Anatase_10x_LA_1_f10498	Anatase	10x	LA	1	1	2.29	3.898	0.07	0.409
sp|Q6PL18|ATAD2_HUMAN	DDSQNAIDHKIES#DTEETQDTSVDHNETGNTGESSVEENEK	41	1154.22	4	Anatase_10x_LA_1_f10498	Anatase	10x	LA	1	1	2.29	3.665	0.085	0.257
sp|O14974|MYPT1_HUMAN	DDSTDFKK	8	478.223	2	Anatase_10x_LA_1_f10498	Anatase	10x	LA	1	0	1.66	1.957	0.277	0.277
sp|Q5VW32|BROX_HUMAN	DDSTKPKPEEEVKPVK	16	609.324	3	Anatase_10x_LA_1_f10498	Anatase	10x	LA	1	0	1.77	3.801	0.376	0.376
sp|Q5VW32|BROX_HUMAN	DDSTKPKPEEEVKPVK	16	913.484	2	Anatase_10x_LA_1_f10498	Anatase	10x	LA	1	0	3.09	2.516	0.267	0.267
sp|Q5VW32|BROX_HUMAN	DDSTKPKPEEEVKPVK	16	457.245	4	Anatase_10x_LA_1_f10498	Anatase	10x	LA	1	0	1.96	2.843	0.192	0.192
sp|P27824|CALX_HUMAN	DDTDDEIAKYDGKWEVEEM*K	20	811.355	3	Anatase_10x_LA_1_f10498	Anatase	10x	LA	1	0	2.66	4.281	0.409	0.409
sp|P27824|CALX_HUMAN	DDTDDEIAKYDGKWEVEEM*K	20	1216.53	2	Anatase_10x_LA_1_f10498	Anatase	10x	LA	1	0	1.1	2.247	0.412	0.412
sp|P27824|CALX_HUMAN	DDTDDEIAKYDGKWEVEEMK	20	806.024	3	Anatase_10x_LA_1_f10498	Anatase	10x	LA	1	0	3.32	4.074	0.481	0.481
sp|P27824|CALX_HUMAN	DDTDDEIAKYDGKWEVEEMK	20	1208.53	2	Anatase_10x_LA_1_f10498	Anatase	10x	LA	1	0	2.69	2.754	0.329	0.329
sp|P27824|CALX_HUMAN	DDTDDEIAKYDGKWEVEEMK	20	1208.53	2	Anatase_10x_LA_1_f10498	Anatase	10x	LA	1	0	3.62	2.159	0.336	0.336
sp|P27824|CALX_HUMAN	DDTDDEIAKYDGKWEVEEMK	20	604.77	4	Anatase_10x_LA_1_f10498	Anatase	10x	LA	1	0	3.21	2.507	0.506	0.506
sp|O15027|SC16A_HUMAN	DDTHKVDVINFAQNK	15	872.439	2	Anatase_10x_LA_1_f10498	Anatase	10x	LA	1	0	2.34	3.636	0.544	0.544
sp|O15027|SC16A_HUMAN	DDTHKVDVINFAQNK	15	581.961	3	Anatase_10x_LA_1_f10498	Anatase	10x	LA	1	0	2.05	5.584	0.492	0.492
sp|P08621|RU17_HUMAN	DDTSRYDERPGPS#PLPHR	18	725.66	3	Anatase_10x_LA_1_f10498	Anatase	10x	LA	1	1	2.01	1.483	0.275	0.275
sp|P08621|RU17_HUMAN	DDTSRYDERPGPS#PLPHR	18	544.497	4	Anatase_10x_LA_1_f10498	Anatase	10x	LA	1	1	1.77	1.873	0.232	0.267
sp|Q8TC07|TBC15_HUMAN	DDVVLPALHFHQGDSK	16	889.451	2	Anatase_10x_LA_1_f10498	Anatase	10x	LA	1	0	4.3	3.017	0.377	0.377
sp|Q8TC07|TBC15_HUMAN	DDVVLPALHFHQGDSK	16	889.451	2	Anatase_10x_LA_1_f10498	Anatase	10x	LA	1	0	4.2	2.985	0.415	0.415
sp|Q9UIG0|BAZ1B_HUMAN	DEAEDYYDVITHPMDFQTVQNK	22	886.731	3	Anatase_10x_LA_1_f10498	Anatase	10x	LA	1	0	3.94	2.577	0.247	0.247
sp|P20042|IF2B_HUMAN	DEALEDEDNKKDDGISFSNQTGPAWAGSER	30	1094.49	3	Anatase_10x_LA_1_f10498	Anatase	10x	LA	1	0	2.3	5.25	0.519	0.519
sp|P20042|IF2B_HUMAN	DEALEDEDNKKDDGISFSNQTGPAWAGSER	30	821.119	4	Anatase_10x_LA_1_f10498	Anatase	10x	LA	1	0	2.16	3.799	0.396	0.396
sp|P78559|MAP1A_HUMAN	DEALEQNIQALEENHQTQEQESLVQEDK	28	1099.18	3	Anatase_10x_LA_1_f10498	Anatase	10x	LA	1	0	2.93	4.069	0.439	0.439
sp|Q14839|CHD4_HUMAN	DEATDGGGDNKEGEDSSVIHYDDK	24	851.69	3	Anatase_10x_LA_1_f10498	Anatase	10x	LA	1	0	2.57	5.084	0.602	0.602
sp|Q14839|CHD4_HUMAN	DEATDGGGDNKEGEDSSVIHYDDK	24	851.69	3	Anatase_10x_LA_1_f10498	Anatase	10x	LA	1	0	2.57	5.708	0.605	0.605
sp|Q14839|CHD4_HUMAN	DEATDGGGDNKEGEDSSVIHYDDK	24	1277.03	2	Anatase_10x_LA_1_f10498	Anatase	10x	LA	1	0	0.04	2.917	0.352	0.352
sp|P27797|CALR_HUMAN	DEDEEDEEDKEEDEEEDVPGQAKDEL	26	1022.4	3	Anatase_10x_LA_1_f10498	Anatase	10x	LA	1	0	3.84	5.829	0.606	0.606
sp|P27797|CALR_HUMAN	DEDEEDEEDKEEDEEEDVPGQAKDEL	26	1022.4	3	Anatase_10x_LA_1_f10498	Anatase	10x	LA	1	0	3.84	4.074	0.5	0.5
sp|O75531|BAF_HUMAN	DEDLFREWLK	10	675.841	2	Anatase_10x_LA_1_f10498	Anatase	10x	LA	1	0	4.05	2.501	0.341	0.341
##sp|Q8NE71|ABCF1_HUMAN	DEEENDLAAFKNQPKAK	17	487.493	4	Anatase_10x_LA_1_f10498	Anatase	10x	LA	1	0	1.72	3.036	0.162	0.162
sp|Q96F63|CCD97_HUMAN	DEEERYFDEEEPEDAPS#PELDGD	23	1396.52	2	Anatase_10x_LA_1_f10498	Anatase	10x	LA	1	1	2.52	2.936	0.478	0.478
sp|Q6GTX8|LAIR1_HUMAN	DEEQKPQQRPDLAVDVLER	19	755.722	3	Anatase_10x_LA_1_f10498	Anatase	10x	LA	1	0	1.44	2.885	0.14	0.14
sp|P00441|SODC_HUMAN	DEERHVGDLGNVTADK	16	877.921	2	Anatase_10x_LA_1_f10498	Anatase	10x	LA	1	0	2.65	3.827	0.566	0.566
sp|P00441|SODC_HUMAN	DEERHVGDLGNVTADK	16	585.616	3	Anatase_10x_LA_1_f10498	Anatase	10x	LA	1	0	2.35	3.856	0.515	0.515
sp|P00441|SODC_HUMAN	DEERHVGDLGNVTADKDGVADVSIEDSVISLSGDHCIIGR	40	850.818	5	Anatase_10x_LA_1_f10498	Anatase	10x	LA	1	0	7.83	5.648	0.489	0.489
sp|Q9Y678|COPG1_HUMAN	DEESGGGSNPFQHLEK	16	865.887	2	Anatase_10x_LA_1_f10498	Anatase	10x	LA	1	0	2.59	2.495	0.389	0.389
sp|Q9UBF2|COPG2_HUMAN	DEESGSGSNPFQHLEK	16	880.891	2	Anatase_10x_LA_1_f10498	Anatase	10x	LA	1	0	1.86	3.029	0.331	0.331
sp|P22314|UBA1_HUMAN	DEFEGLFK	8	492.738	2	Anatase_10x_LA_1_f10498	Anatase	10x	LA	1	0	2.09	1.958	0.351	0.351
sp|P0DMV8|HS71A_HUMAN	DEFEHK	6	402.68	2	Anatase_10x_LA_1_f10498	Anatase	10x	LA	1	0	1.43	1.857	0.169	0.169
sp|P31350|RIR2_HUMAN	DEGLHCDFACLMFK	14	581.584	3	Anatase_10x_LA_1_f10498	Anatase	10x	LA	1	0	2.38	3.011	0.382	0.382
sp|O15234|CASC3_HUMAN	DEGRWEHDK	9	586.261	2	Anatase_10x_LA_1_f10498	Anatase	10x	LA	1	0	2.38	1.876	0.263	0.263
sp|Q5T1M5|FKB15_HUMAN	DEHLQQYQEVCAQR	14	902.409	2	Anatase_10x_LA_1_f10498	Anatase	10x	LA	1	0	2.11	3.141	0.475	0.475
sp|P33992|MCM5_HUMAN	DEHNEERDVM*LAK	13	534.58	3	Anatase_10x_LA_1_f10498	Anatase	10x	LA	1	0	2.37	2.734	0.383	0.383
sp|P33992|MCM5_HUMAN	DEHNEERDVM*LAK	13	801.367	2	Anatase_10x_LA_1_f10498	Anatase	10x	LA	1	0	2.82	2.475	0.373	0.373
sp|P33992|MCM5_HUMAN	DEHNEERDVM*LAK	13	534.58	3	Anatase_10x_LA_1_f10498	Anatase	10x	LA	1	0	2.37	2.612	0.217	0.217
sp|P33992|MCM5_HUMAN	DEHNEERDVMLAK	13	529.249	3	Anatase_10x_LA_1_f10498	Anatase	10x	LA	1	0	2.19	3.311	0.41	0.41
sp|Q16576|RBBP7_HUMAN	DEIFQVHWSPHNETILASSGTDRR	24	699.595	4	Anatase_10x_LA_1_f10498	Anatase	10x	LA	1	0	2.72	2.942	0.457	0.457
sp|Q8N3C0|ASCC3_HUMAN	DEIGHILHHVNIGLK	15	565.651	3	Anatase_10x_LA_1_f10498	Anatase	10x	LA	1	0	2.83	3.879	0.597	0.597
sp|Q8N3C0|ASCC3_HUMAN	DEIGHILHHVNIGLK	15	424.489	4	Anatase_10x_LA_1_f10498	Anatase	10x	LA	1	0	1.26	1.864	0.323	0.323
sp|P23396|RS3_HUMAN	DEILPT#TPISEQK	13	775.873	2	Anatase_10x_LA_1_f10498	Anatase	10x	LA	1	1	3.01	2.431	0.093	0.236
sp|P23396|RS3_HUMAN	DEILPTTPISEQK	13	735.891	2	Anatase_10x_LA_1_f10498	Anatase	10x	LA	1	0	3.56	2.455	0.282	0.282
sp|P63151|2ABA_HUMAN	DEISVDSLDFNKK	13	755.377	2	Anatase_10x_LA_1_f10498	Anatase	10x	LA	1	0	2.09	3.347	0.459	0.459
sp|P63151|2ABA_HUMAN	DEISVDSLDFNKK	13	503.92	3	Anatase_10x_LA_1_f10498	Anatase	10x	LA	1	0	2.04	1.89	0.433	0.433
sp|Q6DKK2|TTC19_HUMAN	DEISVQHIREELAELSK	17	666.019	3	Anatase_10x_LA_1_f10498	Anatase	10x	LA	1	0	4.45	2.635	0.267	0.267
sp|Q9Y375|CIA30_HUMAN	DEIVDHWRGPEGHPLHEVLLEQAK	24	701.86	4	Anatase_10x_LA_1_f10498	Anatase	10x	LA	1	0	2.92	3.408	0.397	0.397
sp|P10155|RO60_HUMAN	DELEVIHLIEEHR	13	544.619	3	Anatase_10x_LA_1_f10498	Anatase	10x	LA	1	0	1.45	2.173	0.297	0.297
sp|Q9H2W6|RM46_HUMAN	DELGDYLKPK	10	589.31	2	Anatase_10x_LA_1_f10498	Anatase	10x	LA	1	0	2.35	1.929	0.213	0.213
sp|P06748|NPM_HUMAN	DELHIVEAEAM*NY#EGSPIK	19	1120.99	2	Anatase_10x_LA_1_f10498	Anatase	10x	LA	1	1	1.45	2.169	0.064	0.271
sp|P06748|NPM_HUMAN	DELHIVEAEAM*NYEGS#PIK	19	1121	2	Anatase_10x_LA_1_f10498	Anatase	10x	LA	1	1	3.5	4.791	0.151	0.545
sp|P06748|NPM_HUMAN	DELHIVEAEAM*NYEGS#PIK	19	747.667	3	Anatase_10x_LA_1_f10498	Anatase	10x	LA	1	1	3.43	3.913	0.165	0.409
sp|P06748|NPM_HUMAN	DELHIVEAEAM*NYEGSPIK	19	1081.01	2	Anatase_10x_LA_1_f10498	Anatase	10x	LA	1	0	2.85	2.103	0.241	0.241
sp|P06748|NPM_HUMAN	DELHIVEAEAM*NYEGSPIK	19	721.011	3	Anatase_10x_LA_1_f10498	Anatase	10x	LA	1	0	2.85	3.489	0.355	0.355
sp|P06748|NPM_HUMAN	DELHIVEAEAM*NYEGSPIK	19	1081.01	2	Anatase_10x_LA_1_f10498	Anatase	10x	LA	1	0	3.65	3.273	0.321	0.321
sp|P06748|NPM_HUMAN	DELHIVEAEAMNYEGS#PIK	19	742.335	3	Anatase_10x_LA_1_f10498	Anatase	10x	LA	1	1	3.05	4.591	0.104	0.521
sp|P06748|NPM_HUMAN	DELHIVEAEAMNYEGS#PIK	19	1113	2	Anatase_10x_LA_1_f10498	Anatase	10x	LA	1	1	4.9	5.313	0.134	0.6
sp|P06748|NPM_HUMAN	DELHIVEAEAMNYEGS#PIK	19	1113	2	Anatase_10x_LA_1_f10498	Anatase	10x	LA	1	1	2.74	3.302	0.206	0.492
sp|P06748|NPM_HUMAN	DELHIVEAEAMNYEGS#PIK	19	1113	2	Anatase_10x_LA_1_f10498	Anatase	10x	LA	1	1	2.24	2.411	0.192	0.482
sp|P06748|NPM_HUMAN	DELHIVEAEAMNYEGS#PIK	19	1113	2	Anatase_10x_LA_1_f10498	Anatase	10x	LA	1	1	1.56	2.013	0.311	0.311
sp|P06748|NPM_HUMAN	DELHIVEAEAMNYEGS#PIK	19	1113	2	Anatase_10x_LA_1_f10498	Anatase	10x	LA	1	1	2.86	2.887	0.213	0.444
sp|P06748|NPM_HUMAN	DELHIVEAEAMNYEGSPIK	19	715.679	3	Anatase_10x_LA_1_f10498	Anatase	10x	LA	1	0	2.48	4.534	0.409	0.409
sp|P06748|NPM_HUMAN	DELHIVEAEAMNYEGSPIK	19	1073.01	2	Anatase_10x_LA_1_f10498	Anatase	10x	LA	1	0	2.45	4.01	0.45	0.45
sp|O60841|IF2P_HUMAN	DELIHELK	8	498.773	2	Anatase_10x_LA_1_f10498	Anatase	10x	LA	1	0	2.49	2.204	0.257	0.257
sp|Q15021|CND1_HUMAN	DELKPAVTQLLWER	14	566.647	3	Anatase_10x_LA_1_f10498	Anatase	10x	LA	1	0	2.28	4.664	0.489	0.489
sp|P23588|IF4B_HUMAN	DENKVDGMNAPK	12	659.31	2	Anatase_10x_LA_1_f10498	Anatase	10x	LA	1	0	2.3	3.103	0.274	0.274
sp|Q9UPN7|PP6R1_HUMAN	DENQHSNASQSLCDIIR	17	993.95	2	Anatase_10x_LA_1_f10498	Anatase	10x	LA	1	0	-0.29	3.461	0.503	0.503
sp|P13612|ITA4_HUMAN	DENVAHVLLEGLHHQRPK	18	698.042	3	Anatase_10x_LA_1_f10498	Anatase	10x	LA	1	0	2.78	4.58	0.427	0.427
sp|P13612|ITA4_HUMAN	DENVAHVLLEGLHHQRPK	18	523.783	4	Anatase_10x_LA_1_f10498	Anatase	10x	LA	1	0	2.05	2.563	0.508	0.508
sp|P53396|ACLY_HUMAN	DEPSVAAMVYPFTGDHK	17	621.959	3	Anatase_10x_LA_1_f10498	Anatase	10x	LA	1	0	2.16	1.849	0.343	0.343
sp|P53396|ACLY_HUMAN	DEPSVAAMVYPFTGDHK	17	932.436	2	Anatase_10x_LA_1_f10498	Anatase	10x	LA	1	0	3.97	2.827	0.481	0.481
sp|P43686|PRS6B_HUMAN	DEQEHEFYK	9	612.764	2	Anatase_10x_LA_1_f10498	Anatase	10x	LA	1	0	3.59	2.294	0.411	0.411
sp|P40121|CAPG_HUMAN	DEQGACAVLAVHLNTLLGERPVQHR	25	696.617	4	Anatase_10x_LA_1_f10498	Anatase	10x	LA	1	0	4	2.686	0.334	0.334
sp|O60341|KDM1A_HUMAN	DEQIEHWK	8	542.758	2	Anatase_10x_LA_1_f10498	Anatase	10x	LA	1	0	2.05	2.163	0.317	0.317
sp|O60341|KDM1A_HUMAN	DEQIEHWKK	9	606.806	2	Anatase_10x_LA_1_f10498	Anatase	10x	LA	1	0	2.55	2.601	0.29	0.29
sp|Q9HCE1|MOV10_HUMAN	DEREGNSPSFFNPEEAATVTSYLK	24	896.756	3	Anatase_10x_LA_1_f10498	Anatase	10x	LA	1	0	3.88	3.825	0.441	0.441
sp|Q9UBW5|BIN2_HUMAN	DERFEQSASNFYQQQAEGHK	20	800.361	3	Anatase_10x_LA_1_f10498	Anatase	10x	LA	1	0	2.13	4.573	0.466	0.466
sp|Q9UBW5|BIN2_HUMAN	DERFEQSASNFYQQQAEGHK	20	600.523	4	Anatase_10x_LA_1_f10498	Anatase	10x	LA	1	0	1.49	2.052	0.196	0.196
sp|O95757|HS74L_HUMAN	DERYDHLDPTEMEK	14	593.263	3	Anatase_10x_LA_1_f10498	Anatase	10x	LA	1	0	2.82	2.955	0.284	0.284
sp|P07910|HNRPC_HUMAN	DETNVKM*ES#EGGADDS#AEEGDLLDDDDNEDRGDDQLELIKDDEK	44	1265.75	4	Anatase_10x_LA_1_f10498	Anatase	10x	LA	1	1	1.66	4.527	0.038	0.465
sp|P47756|CAPZB_HUMAN	DETVSDCSPHIANIGR	16	885.909	2	Anatase_10x_LA_1_f10498	Anatase	10x	LA	1	0	2.36	3.469	0.575	0.575
sp|Q12996|CSTF3_HUMAN	DEVDRKPEYPKPDTQQM*IPFQPR	23	708.354	4	Anatase_10x_LA_1_f10498	Anatase	10x	LA	1	0	3.65	3.449	0.308	0.308
sp|Q12996|CSTF3_HUMAN	DEVDRKPEYPKPDTQQMIPFQPR	23	938.804	3	Anatase_10x_LA_1_f10498	Anatase	10x	LA	1	0	3.12	4.163	0.206	0.206
sp|Q12996|CSTF3_HUMAN	DEVDRKPEYPKPDTQQMIPFQPR	23	938.803	3	Anatase_10x_LA_1_f10498	Anatase	10x	LA	1	0	2.63	5.426	0.418	0.418
sp|Q12996|CSTF3_HUMAN	DEVDRKPEYPKPDTQQMIPFQPR	23	938.803	3	Anatase_10x_LA_1_f10498	Anatase	10x	LA	1	0	2.74	4.434	0.4	0.4
sp|Q13485|SMAD4_HUMAN	DEYVHDFEGQPSLSTEGHSIQTIQHPPSNR	30	852.15	4	Anatase_10x_LA_1_f10498	Anatase	10x	LA	1	0	1.66	5.099	0.408	0.408
sp|Q13485|SMAD4_HUMAN	DEYVHDFEGQPSLSTEGHSIQTIQHPPSNR	30	1135.86	3	Anatase_10x_LA_1_f10498	Anatase	10x	LA	1	0	1.47	4.061	0.457	0.457
sp|P54577|SYYC_HUMAN	DFAAEVVHPGDLK	13	466.574	3	Anatase_10x_LA_1_f10498	Anatase	10x	LA	1	0	1.85	1.701	0.259	0.259
sp|P54577|SYYC_HUMAN	DFAAEVVHPGDLK	13	699.358	2	Anatase_10x_LA_1_f10498	Anatase	10x	LA	1	0	2.41	3.027	0.4	0.4
sp|Q15181|IPYR_HUMAN	DFAIDIIK	8	467.767	2	Anatase_10x_LA_1_f10498	Anatase	10x	LA	1	0	2.33	2.125	0.332	0.332
sp|Q63HN8|RN213_HUMAN	DFATPSLHTSDQS#PGK	16	884.385	2	Anatase_10x_LA_1_f10498	Anatase	10x	LA	1	1	2.65	3.179	0.02	0.42
sp|Q6PI48|SYDM_HUMAN	DFDGLVQVIIPQDESAASVKK	21	753.737	3	Anatase_10x_LA_1_f10498	Anatase	10x	LA	1	0	3.76	2.615	0.462	0.462
sp|Q92545|TM131_HUMAN	DFDHHDSPALEVFTEQPPS#PLPK	23	895.075	3	Anatase_10x_LA_1_f10498	Anatase	10x	LA	1	1	1.6	4.63	0.377	0.464
sp|Q96KC8|DNJC1_HUMAN	DFDIAEQNES#S#DEESLRK	18	1136.44	2	Anatase_10x_LA_1_f10498	Anatase	10x	LA	1	1	2.83	2.919	0.285	0.521
sp|Q9Y5A9|YTHD2_HUMAN	DFDWNLK	7	469.225	2	Anatase_10x_LA_1_f10498	Anatase	10x	LA	1	0	1.55	1.547	0.159	0.159
sp|Q93009|UBP7_HUMAN	DFEPQPGNMSHPRPWLGLDHFNK	23	907.102	3	Anatase_10x_LA_1_f10498	Anatase	10x	LA	1	0	3.18	2.34	0.259	0.259
sp|P07814|SYEP_HUMAN	DFFDAEIK	8	492.738	2	Anatase_10x_LA_1_f10498	Anatase	10x	LA	1	0	2.29	1.526	0.121	0.121
sp|P49915|GUAA_HUMAN	DFHKDEVR	8	523.258	2	Anatase_10x_LA_1_f10498	Anatase	10x	LA	1	0	2.58	2.078	0.201	0.201
sp|Q8N108|MIER1_HUMAN	DFHLIQANK	9	543.291	2	Anatase_10x_LA_1_f10498	Anatase	10x	LA	1	0	1.4	1.766	0.447	0.447
sp|Q9UKK3|PARP4_HUMAN	DFHPSDHTELEEYRPEFSNFSK	22	904.407	3	Anatase_10x_LA_1_f10498	Anatase	10x	LA	1	0	1.7	2.792	0.227	0.227
sp|Q9UKK3|PARP4_HUMAN	DFHPSDHTELEEYRPEFSNFSK	22	904.408	3	Anatase_10x_LA_1_f10498	Anatase	10x	LA	1	0	3.27	3.117	0.379	0.379
sp|Q9UKK3|PARP4_HUMAN	DFHPSDHTELEEYRPEFSNFSK	22	678.558	4	Anatase_10x_LA_1_f10498	Anatase	10x	LA	1	0	2.89	2.686	0.322	0.322
sp|Q7L2H7|EIF3M_HUMAN	DFIDSLGLLHEQNMAK	16	610.976	3	Anatase_10x_LA_1_f10498	Anatase	10x	LA	1	0	4.65	2.053	0.282	0.282
sp|Q9H6W3|NO66_HUMAN	DFIHDSLPPVLTDRER	16	637.331	3	Anatase_10x_LA_1_f10498	Anatase	10x	LA	1	0	1.63	2.487	0.168	0.168
sp|Q8NCG7|DGLB_HUMAN	DFIHVSFHDK	10	415.541	3	Anatase_10x_LA_1_f10498	Anatase	10x	LA	1	0	1.39	2.657	0.462	0.462
sp|Q9H3N1|TMX1_HUMAN	DFINFISDK	9	549.779	2	Anatase_10x_LA_1_f10498	Anatase	10x	LA	1	0	2.86	2.404	0.242	0.242
sp|O75475|PSIP1_HUMAN	DFKPGDLIFAK	11	625.844	2	Anatase_10x_LA_1_f10498	Anatase	10x	LA	1	0	2.5	1.937	0.292	0.292
sp|O75475|PSIP1_HUMAN	DFKPGDLIFAK	11	417.565	3	Anatase_10x_LA_1_f10498	Anatase	10x	LA	1	0	1.61	3.581	0.484	0.484
sp|P05141|ADT2_HUMAN	DFLAGGVAAAISK	13	610.339	2	Anatase_10x_LA_1_f10498	Anatase	10x	LA	1	0	1.76	3.706	0.529	0.529
sp|P04818|TYSY_HUMAN	DFLDSLGFSTR	11	629.313	2	Anatase_10x_LA_1_f10498	Anatase	10x	LA	1	0	5.72	1.677	0.5	0.5
sp|A4D1E9|GTPBA_HUMAN	DFLHLFEK	8	524.779	2	Anatase_10x_LA_1_f10498	Anatase	10x	LA	1	0	5.1	1.578	0.265	0.265
sp|Q13838|DX39B_HUMAN	DFLLKPELLR	10	415.253	3	Anatase_10x_LA_1_f10498	Anatase	10x	LA	1	0	3.69	1.853	0.39	0.39
sp|Q9Y6D5|BIG2_HUMAN	DFLRPFEHIM*K	11	483.584	3	Anatase_10x_LA_1_f10498	Anatase	10x	LA	1	0	1.4	2.21	0.288	0.288
sp|Q9Y6D5|BIG2_HUMAN	DFLRPFEHIMK	11	478.253	3	Anatase_10x_LA_1_f10498	Anatase	10x	LA	1	0	2.25	2.691	0.369	0.369
sp|O94776|MTA2_HUMAN	DFNDIRQDFLPWK	13	565.284	3	Anatase_10x_LA_1_f10498	Anatase	10x	LA	1	0	2.77	2.706	0.376	0.376
sp|P32969|RL9_HUMAN	DFNHINVELSLLGK	14	799.933	2	Anatase_10x_LA_1_f10498	Anatase	10x	LA	1	0	3.6	3.27	0.608	0.608
sp|P32969|RL9_HUMAN	DFNHINVELSLLGK	14	533.624	3	Anatase_10x_LA_1_f10498	Anatase	10x	LA	1	0	3.15	4.468	0.459	0.459
sp|P32969|RL9_HUMAN	DFNHINVELSLLGKK	15	576.323	3	Anatase_10x_LA_1_f10498	Anatase	10x	LA	1	0	3.85	5.171	0.393	0.393
sp|P32969|RL9_HUMAN	DFNHINVELSLLGKK	15	863.983	2	Anatase_10x_LA_1_f10498	Anatase	10x	LA	1	0	6.25	2.812	0.409	0.409
sp|Q14676|MDC1_HUMAN	DFPLHLGK	8	463.759	2	Anatase_10x_LA_1_f10498	Anatase	10x	LA	1	0	2	1.591	0.336	0.336
sp|P78559|MAP1A_HUMAN	DFQESS#PQK	9	573.231	2	Anatase_10x_LA_1_f10498	Anatase	10x	LA	1	1	2.49	1.749	0.079	0.254
sp|Q9Y6G9|DC1L1_HUMAN	DFQEYVEPGEDFPAS#PQRR	19	783.008	3	Anatase_10x_LA_1_f10498	Anatase	10x	LA	1	1	3.19	2.315	0.185	0.185
sp|Q9Y6G9|DC1L1_HUMAN	DFQEYVEPGEDFPAS#PQRR	19	1174.01	2	Anatase_10x_LA_1_f10498	Anatase	10x	LA	1	1	1.37	2.506	0.472	0.472
sp|Q15361|TTF1_HUMAN	DFQHLIS#SPLKK	12	498.258	3	Anatase_10x_LA_1_f10498	Anatase	10x	LA	1	1	2.28	1.993	0.009	0.218
sp|Q7Z7A1|CNTRL_HUMAN	DFQNHLNHVVDGLVRPEEVAAR	22	629.577	4	Anatase_10x_LA_1_f10498	Anatase	10x	LA	1	0	2.53	3.194	0.393	0.393
sp|Q9NRY2|SOSSC_HUMAN	DFRDHAEQQHIAAQQK	16	481.238	4	Anatase_10x_LA_1_f10498	Anatase	10x	LA	1	0	1.97	3.074	0.437	0.437
sp|Q96K58|ZN668_HUMAN	DFRQPADLAMHR	12	486.243	3	Anatase_10x_LA_1_f10498	Anatase	10x	LA	1	0	1.68	3.152	0.185	0.185
sp|O15372|EIF3H_HUMAN	DFS#PEALKK	9	557.764	2	Anatase_10x_LA_1_f10498	Anatase	10x	LA	1	1	2.22	1.486	0.254	0.254
sp|P55081|MFAP1_HUMAN	DFSAPTLEDHFNK	13	760.858	2	Anatase_10x_LA_1_f10498	Anatase	10x	LA	1	0	4.83	1.973	0.238	0.238
sp|P48643|TCPE_HUMAN	DFSHPQM*PK	9	551.754	2	Anatase_10x_LA_1_f10498	Anatase	10x	LA	1	0	2.38	1.387	0.25	0.25
sp|P48643|TCPE_HUMAN	DFSHPQMPK	9	543.756	2	Anatase_10x_LA_1_f10498	Anatase	10x	LA	1	0	1.75	2.368	0.343	0.343
sp|Q09028|RBBP4_HUMAN	DFSIHR	6	387.699	2	Anatase_10x_LA_1_f10498	Anatase	10x	LA	1	0	1.76	1.519	0.227	0.227
sp|O15372|EIF3H_HUMAN	DFSPEALKK	9	517.78	2	Anatase_10x_LA_1_f10498	Anatase	10x	LA	1	0	1.65	1.902	0.314	0.314
sp|Q14789|GOGB1_HUMAN	DFSSHDEINNYLQQIDQLK	19	769.703	3	Anatase_10x_LA_1_f10498	Anatase	10x	LA	1	0	1.84	3.445	0.291	0.291
sp|Q14789|GOGB1_HUMAN	DFSSHDEINNYLQQIDQLK	19	1154.06	2	Anatase_10x_LA_1_f10498	Anatase	10x	LA	1	0	8.01	3.129	0.419	0.419
sp|O43149|ZZEF1_HUMAN	DFTNYFGHLEGCGADLHK	18	694.313	3	Anatase_10x_LA_1_f10498	Anatase	10x	LA	1	0	3.05	3.317	0.49	0.49
sp|Q99798|ACON_HUMAN	DFTPGKPLK	9	501.786	2	Anatase_10x_LA_1_f10498	Anatase	10x	LA	1	0	2.32	1.77	0.326	0.326
sp|P60842|IF4A1_HUMAN	DFTVSAM*HGDMDQK	14	799.337	2	Anatase_10x_LA_1_f10498	Anatase	10x	LA	1	0	2.62	2.49	0.206	0.383
sp|P60842|IF4A1_HUMAN	DFTVSAM*HGDMDQK	14	799.337	2	Anatase_10x_LA_1_f10498	Anatase	10x	LA	1	0	2.3	3.483	0.372	0.542
sp|P60842|IF4A1_HUMAN	DFTVSAMHGDM*DQK	14	799.336	2	Anatase_10x_LA_1_f10498	Anatase	10x	LA	1	0	1.86	3.159	0.207	0.507
sp|P60842|IF4A1_HUMAN	DFTVSAMHGDMDQK	14	791.339	2	Anatase_10x_LA_1_f10498	Anatase	10x	LA	1	0	2.32	3.74	0.606	0.606
sp|P60842|IF4A1_HUMAN	DFTVSAMHGDMDQK	14	527.895	3	Anatase_10x_LA_1_f10498	Anatase	10x	LA	1	0	1.92	1.934	0.412	0.412
sp|O14727|APAF_HUMAN	DFVCHQGTVLSCDISHDATK	20	764.013	3	Anatase_10x_LA_1_f10498	Anatase	10x	LA	1	0	0.42	5.761	0.553	0.553
sp|Q08211|DHX9_HUMAN	DFVNYLVR	8	513.275	2	Anatase_10x_LA_1_f10498	Anatase	10x	LA	1	0	2.01	2.205	0.393	0.393
sp|P33527|MRP1_HUMAN	DFVSALPDKLDHECAEGGENLSVGQR	26	948.45	3	Anatase_10x_LA_1_f10498	Anatase	10x	LA	1	0	3.19	4.397	0.364	0.364
sp|Q13131|AAPK1_HUMAN	DFYLAT#SPPDSFLDDHHLTRPHPER	25	1015.13	3	Anatase_10x_LA_1_f10498	Anatase	10x	LA	1	1	2.57	3.541	0.03	0.355
sp|Q13131|AAPK1_HUMAN	DFYLATSPPDSFLDDHHLTRPHPER	25	593.489	5	Anatase_10x_LA_1_f10498	Anatase	10x	LA	1	0	2.66	2.941	0.418	0.418
sp|Q13131|AAPK1_HUMAN	DFYLATSPPDSFLDDHHLTRPHPER	25	741.61	4	Anatase_10x_LA_1_f10498	Anatase	10x	LA	1	0	4.28	2.711	0.327	0.327
sp|P04075|ALDOA_HUMAN	DGADFAKWR	9	533.26	2	Anatase_10x_LA_1_f10498	Anatase	10x	LA	1	0	1.99	2.156	0.357	0.357
##sp|Q92608|DOCK2_HUMAN	DGAGVCIANPLTK	13	658.339	2	Anatase_10x_LA_1_f10498	Anatase	10x	LA	1	0	1.98	1.111	0.19	0.19
##sp|Q9BY11|PACN1_HUMAN	DGAQSTS#EVAGT#ANTLAVGEAK	22	1118.98	2	Anatase_10x_LA_1_f10498	Anatase	10x	LA	1	1	3.06	1.593	0.21	0.241
sp|P31749|AKT1_HUMAN	DGATMKT#FCGTPEYLAPEVLEDNDYGR	27	1043.78	3	Anatase_10x_LA_1_f10498	Anatase	10x	LA	1	1	2.93	5.328	0.047	0.517
sp|Q6NS38|ALKB2_HUMAN	DGCDHIGEHRDDERELAPGSPIASVSFGACR	31	682.912	5	Anatase_10x_LA_1_f10498	Anatase	10x	LA	1	0	1.58	2.373	0.256	0.256
sp|Q6NS38|ALKB2_HUMAN	DGCDHIGEHRDDERELAPGSPIASVSFGACR	31	853.388	4	Anatase_10x_LA_1_f10498	Anatase	10x	LA	1	0	1.75	3.826	0.476	0.476
sp|Q9NR09|BIRC6_HUMAN	DGCM*HCDADGLHSLSYHPALNAILAVTSR	29	800.125	4	Anatase_10x_LA_1_f10498	Anatase	10x	LA	1	0	6.89	3.688	0.433	0.433
sp|P13667|PDIA4_HUMAN	DGDDVIIIGVFK	12	645.853	2	Anatase_10x_LA_1_f10498	Anatase	10x	LA	1	0	3.13	3.122	0.629	0.629
sp|Q6PIZ9|TRAT1_HUMAN	DGDEQLHAIDASVSK	15	792.881	2	Anatase_10x_LA_1_f10498	Anatase	10x	LA	1	0	3.47	2.574	0.417	0.417
sp|Q14697|GANAB_HUMAN	DGDKPEETQGKAEKDEPGAWEETFK	25	706.077	4	Anatase_10x_LA_1_f10498	Anatase	10x	LA	1	0	2.02	2.589	0.219	0.219
sp|Q9UER7|DAXX_HUMAN	DGDKS#PMSSLQISNEK	16	908.397	2	Anatase_10x_LA_1_f10498	Anatase	10x	LA	1	1	2.45	2.11	0.17	0.443
sp|P25205|MCM3_HUMAN	DGDSYDPYDFS#DT#EEEMPQVHT#PK	24	1014.69	3	Anatase_10x_LA_1_f10498	Anatase	10x	LA	1	1	2.02	2.289	0.022	0.419
sp|P25205|MCM3_HUMAN	DGDSYDPYDFS#DTEEEM*PQVHT#PK	24	993.362	3	Anatase_10x_LA_1_f10498	Anatase	10x	LA	1	1	2.22	3.412	0.062	0.486
sp|P25205|MCM3_HUMAN	DGDSYDPYDFS#DTEEEM*PQVHT#PK	24	993.362	3	Anatase_10x_LA_1_f10498	Anatase	10x	LA	1	1	2.35	3.398	0.016	0.626
sp|P25205|MCM3_HUMAN	DGDSYDPYDFS#DTEEEM*PQVHTPK	24	966.706	3	Anatase_10x_LA_1_f10498	Anatase	10x	LA	1	1	2.32	4.01	0.152	0.546
sp|P25205|MCM3_HUMAN	DGDSYDPYDFS#DTEEEMPQVHT#PK	24	988.03	3	Anatase_10x_LA_1_f10498	Anatase	10x	LA	1	1	2.04	5.14	0.101	0.554
sp|P25205|MCM3_HUMAN	DGDSYDPYDFS#DTEEEMPQVHTPK	24	961.375	3	Anatase_10x_LA_1_f10498	Anatase	10x	LA	1	1	2.82	3.352	0.028	0.451
sp|P25205|MCM3_HUMAN	DGDSYDPYDFS#DTEEEMPQVHTPK	24	961.375	3	Anatase_10x_LA_1_f10498	Anatase	10x	LA	1	1	3	4.343	0.166	0.604
sp|O43719|HTSF1_HUMAN	DGDTQTDAGGEPDSLGQQPTDTPYEWDLDKK	31	1127.17	3	Anatase_10x_LA_1_f10498	Anatase	10x	LA	1	0	2.86	2.76	0.382	0.382
sp|P48643|TCPE_HUMAN	DGDVTVTNDGATILSMMDVDHQIAK	25	882.752	3	Anatase_10x_LA_1_f10498	Anatase	10x	LA	1	0	1.61	2.728	0.276	0.276
sp|P48643|TCPE_HUMAN	DGDVTVTNDGATILSMMDVDHQIAK	25	1323.63	2	Anatase_10x_LA_1_f10498	Anatase	10x	LA	1	0	1.77	2.06	0.282	0.282
sp|P98175|RBM10_HUMAN	DGDYRDQDYRTEQGEEEEEEEDEEEEEK	28	1170.45	3	Anatase_10x_LA_1_f10498	Anatase	10x	LA	1	0	1.95	2.809	0.33	0.33
sp|P98175|RBM10_HUMAN	DGDYRDQDYRTEQGEEEEEEEDEEEEEK	28	878.091	4	Anatase_10x_LA_1_f10498	Anatase	10x	LA	1	0	1.31	4.332	0.427	0.427
sp|P30443|1A01_HUMAN	DGEDQTQDTELVETRPAGDGTFQK	24	879.737	3	Anatase_10x_LA_1_f10498	Anatase	10x	LA	1	0	2.42	3.806	0.399	0.399
sp|P30443|1A01_HUMAN	DGEDQTQDTELVETRPAGDGTFQK	24	1319.1	2	Anatase_10x_LA_1_f10498	Anatase	10x	LA	1	0	1.79	3.334	0.526	0.526
sp|P30443|1A01_HUMAN	DGEDQTQDTELVETRPAGDGTFQK	24	1319.1	2	Anatase_10x_LA_1_f10498	Anatase	10x	LA	1	0	1.26	2.871	0.519	0.519
sp|Q15435|PP1R7_HUMAN	DGEERGEEDPEEEHELPVDM*ETINLDRDAEDVDLNHYR	38	905.997	5	Anatase_10x_LA_1_f10498	Anatase	10x	LA	1	0	2.81	5.58	0.423	0.423
sp|Q15435|PP1R7_HUMAN	DGEERGEEDPEEEHELPVDM*ETINLDRDAEDVDLNHYR	38	1132.25	4	Anatase_10x_LA_1_f10498	Anatase	10x	LA	1	0	3.76	4.811	0.397	0.397
sp|Q15435|PP1R7_HUMAN	DGEERGEEDPEEEHELPVDMETINLDRDAEDVDLNHYR	38	1128.24	4	Anatase_10x_LA_1_f10498	Anatase	10x	LA	1	0	1.79	4.284	0.374	0.374
sp|Q9UBB9|TFP11_HUMAN	DGEGRIDDDDDERENFEITDWDLQNEFNPNR	31	942.905	4	Anatase_10x_LA_1_f10498	Anatase	10x	LA	1	0	2.14	3.67	0.311	0.311
sp|Q9UBB9|TFP11_HUMAN	DGEGRIDDDDDERENFEITDWDLQNEFNPNR	31	942.906	4	Anatase_10x_LA_1_f10498	Anatase	10x	LA	1	0	3.05	3.238	0.255	0.255
sp|Q9UBB9|TFP11_HUMAN	DGEGRIDDDDDERENFEITDWDLQNEFNPNR	31	1256.87	3	Anatase_10x_LA_1_f10498	Anatase	10x	LA	1	0	1.37	3.944	0.383	0.383
sp|P31323|KAP3_HUMAN	DGEHVIDQGDDGDNFYVIDR	20	760.335	3	Anatase_10x_LA_1_f10498	Anatase	10x	LA	1	0	2.72	3.569	0.304	0.304
sp|P31323|KAP3_HUMAN	DGEHVIDQGDDGDNFYVIDR	20	760.335	3	Anatase_10x_LA_1_f10498	Anatase	10x	LA	1	0	2.55	3.888	0.458	0.458
sp|Q15397|PUM3_HUMAN	DGELHIAEHPAGHLVLK	17	612.665	3	Anatase_10x_LA_1_f10498	Anatase	10x	LA	1	0	2.17	4.284	0.596	0.596
sp|Q15397|PUM3_HUMAN	DGELHIAEHPAGHLVLK	17	459.75	4	Anatase_10x_LA_1_f10498	Anatase	10x	LA	1	0	1.87	4.885	0.58	0.58
sp|Q15397|PUM3_HUMAN	DGELHIAEHPAGHLVLK	17	918.494	2	Anatase_10x_LA_1_f10498	Anatase	10x	LA	1	0	2.16	4.438	0.629	0.629
sp|Q15397|PUM3_HUMAN	DGELHIAEHPAGHLVLK	17	459.75	4	Anatase_10x_LA_1_f10498	Anatase	10x	LA	1	0	1.93	4.623	0.588	0.588
sp|Q8IV38|ANKY2_HUMAN	DGENKLDTLIK	11	623.34	2	Anatase_10x_LA_1_f10498	Anatase	10x	LA	1	0	2.68	1.661	0.144	0.144
sp|O95831|AIFM1_HUMAN	DGEQHEDLNEVAK	13	742.339	2	Anatase_10x_LA_1_f10498	Anatase	10x	LA	1	0	2.8	3.938	0.509	0.509
sp|Q9P2D1|CHD7_HUMAN	DGETLEGS#DAEESLDK	16	887.85	2	Anatase_10x_LA_1_f10498	Anatase	10x	LA	1	1	1.87	2.734	0.259	0.259
sp|Q9UKW4|VAV3_HUMAN	DGFFHIAENRK	11	445.227	3	Anatase_10x_LA_1_f10498	Anatase	10x	LA	1	0	1.7	2.552	0.422	0.422
sp|O75534|CSDE1_HUMAN	DGFGFIK	7	392.206	2	Anatase_10x_LA_1_f10498	Anatase	10x	LA	1	0	1.71	2.228	0.402	0.402
sp|Q63HN8|RN213_HUMAN	DGFHLVK	7	408.225	2	Anatase_10x_LA_1_f10498	Anatase	10x	LA	1	0	1.8	1.988	0.174	0.174
sp|O14950|ML12B_HUMAN	DGFIDKEDLHDM*LASLGK	18	673.997	3	Anatase_10x_LA_1_f10498	Anatase	10x	LA	1	0	3.44	2.503	0.295	0.295
sp|O14950|ML12B_HUMAN	DGFIDKEDLHDM*LASLGK	18	1010.49	2	Anatase_10x_LA_1_f10498	Anatase	10x	LA	1	0	3.32	3.636	0.637	0.637
sp|O14950|ML12B_HUMAN	DGFIDKEDLHDM*LASLGK	18	505.749	4	Anatase_10x_LA_1_f10498	Anatase	10x	LA	1	0	2.35	2.964	0.427	0.427
sp|O14950|ML12B_HUMAN	DGFIDKEDLHDMLASLGK	18	501.752	4	Anatase_10x_LA_1_f10498	Anatase	10x	LA	1	0	5.63	3.34	0.383	0.383
sp|O14950|ML12B_HUMAN	DGFIDKEDLHDMLASLGK	18	668.665	3	Anatase_10x_LA_1_f10498	Anatase	10x	LA	1	0	2.97	2.971	0.423	0.423
sp|Q14331|FRG1_HUMAN	DGFLHETLLDRR	12	491.261	3	Anatase_10x_LA_1_f10498	Anatase	10x	LA	1	0	2.07	3.047	0.437	0.437
sp|P10253|LYAG_HUMAN	DGFRDFPAMVQELHQGGR	18	687.332	3	Anatase_10x_LA_1_f10498	Anatase	10x	LA	1	0	2.28	3.776	0.35	0.35
##sp|Q15878|CAC1E_HUMAN	DGGDGKLS#GGRSIREEEFK	19	1058.99	2	Anatase_10x_LA_1_f10498	Anatase	10x	LA	1	1	2.99	1.991	0.082	0.182
sp|O43491|E41L2_HUMAN	DGGDKKEPTQAVVEEQVLDK	20	729.04	3	Anatase_10x_LA_1_f10498	Anatase	10x	LA	1	0	2.83	2.382	0.155	0.155
sp|O43491|E41L2_HUMAN	DGGDKKEPTQAVVEEQVLDKEEPLPEEQR	29	823.912	4	Anatase_10x_LA_1_f10498	Anatase	10x	LA	1	0	2.79	4.816	0.52	0.52
sp|O43491|E41L2_HUMAN	DGGDKKEPTQAVVEEQVLDKEEPLPEEQR	29	1098.21	3	Anatase_10x_LA_1_f10498	Anatase	10x	LA	1	0	2.42	5.906	0.536	0.536
sp|P48634|PRC2A_HUMAN	DGGGRGPDELEGPDSK	16	793.36	2	Anatase_10x_LA_1_f10498	Anatase	10x	LA	1	0	3.06	2.872	0.406	0.406
sp|O14828|SCAM3_HUMAN	DGGNPFAEPSELDNPFQDPAVIQHRPSR	28	773.374	4	Anatase_10x_LA_1_f10498	Anatase	10x	LA	1	0	2.78	4.908	0.453	0.453
sp|O14828|SCAM3_HUMAN	DGGNPFAEPSELDNPFQDPAVIQHRPSR	28	1030.83	3	Anatase_10x_LA_1_f10498	Anatase	10x	LA	1	0	2.94	3.126	0.304	0.304
sp|P30622|CLIP1_HUMAN	DGHDQHVLELEAK	13	497.58	3	Anatase_10x_LA_1_f10498	Anatase	10x	LA	1	0	1.52	3.838	0.534	0.534
sp|P49915|GUAA_HUMAN	DGHHHYEGAVVILDAGAQYGK	21	560.025	4	Anatase_10x_LA_1_f10498	Anatase	10x	LA	1	0	1.5	3.152	0.313	0.313
sp|Q5VUA4|ZN318_HUMAN	DGHKDPLLVEVSR	13	488.933	3	Anatase_10x_LA_1_f10498	Anatase	10x	LA	1	0	1.8	2.812	0.295	0.295
sp|Q96JH7|VCIP1_HUMAN	DGHLNKPICIAWSSSGR	17	633.318	3	Anatase_10x_LA_1_f10498	Anatase	10x	LA	1	0	2.4	3.896	0.55	0.55
sp|Q13905|RPGF1_HUMAN	DGHPRDPSAVSGVPGK	16	525.935	3	Anatase_10x_LA_1_f10498	Anatase	10x	LA	1	0	2.15	3.111	0.393	0.393
sp|A1L0T0|ILVBL_HUMAN	DGHPVVVNILIGR	13	694.906	2	Anatase_10x_LA_1_f10498	Anatase	10x	LA	1	0	2.38	1.776	0.444	0.444
sp|P78559|MAP1A_HUMAN	DGHS#PM*SK	8	477.675	2	Anatase_10x_LA_1_f10498	Anatase	10x	LA	1	1	3.41	1.035	0.268	0.268
sp|P51784|UBP11_HUMAN	DGHYTTFACNK	11	657.284	2	Anatase_10x_LA_1_f10498	Anatase	10x	LA	1	0	2.69	2.904	0.427	0.427
sp|P51784|UBP11_HUMAN	DGHYTTFACNK	11	438.525	3	Anatase_10x_LA_1_f10498	Anatase	10x	LA	1	0	1.48	1.968	0.218	0.218
sp|P52756|RBM5_HUMAN	DGIDHSNIGNK	11	390.524	3	Anatase_10x_LA_1_f10498	Anatase	10x	LA	1	0	1.68	1.802	0.309	0.309
sp|P52756|RBM5_HUMAN	DGIDHSNIGNK	11	585.282	2	Anatase_10x_LA_1_f10498	Anatase	10x	LA	1	0	2.45	2.02	0.234	0.234
sp|P19793|RXRA_HUMAN	DGILLATGLHVHR	13	467.938	3	Anatase_10x_LA_1_f10498	Anatase	10x	LA	1	0	2.05	2.332	0.421	0.421
sp|Q6NUK1|SCMC1_HUMAN	DGKLDFEEFMK	11	453.549	3	Anatase_10x_LA_1_f10498	Anatase	10x	LA	1	0	1.97	4.066	0.514	0.514
sp|P36551|HEM6_HUMAN	DGKLPFCAMGVSSVIHPK	18	648.336	3	Anatase_10x_LA_1_f10498	Anatase	10x	LA	1	0	2.25	3.941	0.545	0.545
sp|P36551|HEM6_HUMAN	DGKLPFCAMGVSSVIHPK	18	486.503	4	Anatase_10x_LA_1_f10498	Anatase	10x	LA	1	0	1.66	4.055	0.51	0.51
sp|P20810|ICAL_HUMAN	DGKPLLPEPEEKPKPR	16	610.677	3	Anatase_10x_LA_1_f10498	Anatase	10x	LA	1	0	1.94	2.952	0.529	0.529
sp|O43707|ACTN4_HUMAN	DGLAFNALIHR	11	613.837	2	Anatase_10x_LA_1_f10498	Anatase	10x	LA	1	0	2.65	2.49	0.303	0.303
sp|P27540|ARNT_HUMAN	DGLASYNHSQVVQPVTTTGPEHSK	24	851.42	3	Anatase_10x_LA_1_f10498	Anatase	10x	LA	1	0	2.67	4.551	0.498	0.498
sp|P12814|ACTN1_HUMAN	DGLGFCALIHR	11	629.823	2	Anatase_10x_LA_1_f10498	Anatase	10x	LA	1	0	2.39	1.874	0.284	0.284
sp|P12814|ACTN1_HUMAN	DGLGFCALIHR	11	420.217	3	Anatase_10x_LA_1_f10498	Anatase	10x	LA	1	0	1.37	1.531	0.221	0.221
sp|P45974|UBP5_HUMAN	DGLGGLPDIVR	11	556.311	2	Anatase_10x_LA_1_f10498	Anatase	10x	LA	1	0	3.64	1.364	0.39	0.39
sp|P11413|G6PD_HUMAN	DGLLPENTFIVGYAR	15	832.939	2	Anatase_10x_LA_1_f10498	Anatase	10x	LA	1	0	3.93	1.856	0.271	0.271
sp|Q71RC2|LARP4_HUMAN	DGLNQTTIPVS#PPSTTKPSR	20	1088.54	2	Anatase_10x_LA_1_f10498	Anatase	10x	LA	1	1	1.89	2.063	0.034	0.174
sp|Q71RC2|LARP4_HUMAN	DGLNQTTIPVS#PPSTTKPSR	20	726.028	3	Anatase_10x_LA_1_f10498	Anatase	10x	LA	1	1	2.7	2.347	0.032	0.279
sp|Q9UQ35|SRRM2_HUMAN	DGLPRT#PSRR	10	412.207	3	Anatase_10x_LA_1_f10498	Anatase	10x	LA	1	1	2.09	1.803	0.187	0.187
sp|Q14684|RRP1B_HUMAN	DGLSDERGRDDCGTFEDTGPLLQFDYK	27	1036.13	3	Anatase_10x_LA_1_f10498	Anatase	10x	LA	1	0	2.67	3.157	0.297	0.297
sp|Q01082|SPTB2_HUMAN	DGM*AFNALIHK	11	616.809	2	Anatase_10x_LA_1_f10498	Anatase	10x	LA	1	0	1.31	1.569	0.218	0.218
sp|Q01082|SPTB2_HUMAN	DGMAFNALIHK	11	608.812	2	Anatase_10x_LA_1_f10498	Anatase	10x	LA	1	0	2.58	2.667	0.405	0.405
sp|Q01082|SPTB2_HUMAN	DGMAFNALIHK	11	406.21	3	Anatase_10x_LA_1_f10498	Anatase	10x	LA	1	0	2.17	1.928	0.397	0.397
sp|P31942|HNRH3_HUMAN	DGMDNQGGYGS#VGR	14	746.781	2	Anatase_10x_LA_1_f10498	Anatase	10x	LA	1	1	2.26	2.201	0.256	0.311
sp|P31942|HNRH3_HUMAN	DGMDNQGGYGSVGR	14	706.798	2	Anatase_10x_LA_1_f10498	Anatase	10x	LA	1	0	2.37	3.044	0.472	0.472
sp|Q9Y666|S12A7_HUMAN	DGMSHLIQSAGLGGLK	16	528.613	3	Anatase_10x_LA_1_f10498	Anatase	10x	LA	1	0	2.43	3.107	0.203	0.203
sp|Q9UNS2|CSN3_HUMAN	DGMVSFHDNPEK	12	459.204	3	Anatase_10x_LA_1_f10498	Anatase	10x	LA	1	0	1.38	1.788	0.161	0.161
sp|O60884|DNJA2_HUMAN	DGNDLHM*TYK	10	605.266	2	Anatase_10x_LA_1_f10498	Anatase	10x	LA	1	0	2.78	1.902	0.165	0.165
sp|O60884|DNJA2_HUMAN	DGNDLHMTYK	10	597.268	2	Anatase_10x_LA_1_f10498	Anatase	10x	LA	1	0	2.21	2.97	0.494	0.494
sp|O60884|DNJA2_HUMAN	DGNDLHMTYK	10	398.514	3	Anatase_10x_LA_1_f10498	Anatase	10x	LA	1	0	1.26	1.718	0.193	0.193
sp|P62158|CALM_HUMAN	DGNGYISAAELR	12	633.311	2	Anatase_10x_LA_1_f10498	Anatase	10x	LA	1	0	2.58	1.856	0.304	0.304
sp|Q9BZK7|TBL1R_HUMAN	DGNLASTLGQHK	12	620.819	2	Anatase_10x_LA_1_f10498	Anatase	10x	LA	1	0	2.07	2.613	0.367	0.367
sp|Q9BZK7|TBL1R_HUMAN	DGNLASTLGQHK	12	414.215	3	Anatase_10x_LA_1_f10498	Anatase	10x	LA	1	0	1.36	2.587	0.574	0.574
sp|P40227|TCPZ_HUMAN	DGNVLLHEM*QIQHPTASLIAK	21	777.745	3	Anatase_10x_LA_1_f10498	Anatase	10x	LA	1	0	2.97	4.794	0.445	0.445
sp|P40227|TCPZ_HUMAN	DGNVLLHEM*QIQHPTASLIAK	21	583.56	4	Anatase_10x_LA_1_f10498	Anatase	10x	LA	1	0	1.87	2.294	0.258	0.258
sp|P40227|TCPZ_HUMAN	DGNVLLHEM*QIQHPTASLIAK	21	1166.11	2	Anatase_10x_LA_1_f10498	Anatase	10x	LA	1	0	1.61	2.721	0.301	0.301
sp|P40227|TCPZ_HUMAN	DGNVLLHEMQIQHPTASLIAK	21	772.413	3	Anatase_10x_LA_1_f10498	Anatase	10x	LA	1	0	2.89	5.416	0.57	0.57
sp|P40227|TCPZ_HUMAN	DGNVLLHEMQIQHPTASLIAK	21	579.561	4	Anatase_10x_LA_1_f10498	Anatase	10x	LA	1	0	2.07	3.176	0.448	0.448
sp|P40227|TCPZ_HUMAN	DGNVLLHEMQIQHPTASLIAK	21	1158.12	2	Anatase_10x_LA_1_f10498	Anatase	10x	LA	1	0	2.26	4.775	0.474	0.474
sp|P40227|TCPZ_HUMAN	DGNVLLHEMQIQHPTASLIAK	21	772.413	3	Anatase_10x_LA_1_f10498	Anatase	10x	LA	1	0	3.3	5.226	0.617	0.617
sp|Q96EB6|SIR1_HUMAN	DGPGLERS#PGEPGGAAPER	19	964.93	2	Anatase_10x_LA_1_f10498	Anatase	10x	LA	1	1	1.74	1.837	0.261	0.261
sp|Q96EB6|SIR1_HUMAN	DGPGLERS#PGEPGGAAPER	19	964.931	2	Anatase_10x_LA_1_f10498	Anatase	10x	LA	1	1	2.03	1.96	0.221	0.221
sp|Q2NL82|TSR1_HUMAN	DGPPHQVLVVPLHSR	15	550.975	3	Anatase_10x_LA_1_f10498	Anatase	10x	LA	1	0	1.9	2.879	0.205	0.205
sp|Q2NL82|TSR1_HUMAN	DGPPHQVLVVPLHSR	15	413.483	4	Anatase_10x_LA_1_f10498	Anatase	10x	LA	1	0	1.46	1.916	0.3	0.3
sp|Q86YV0|RASL3_HUMAN	DGPPSALGS#RESLATLSELDLGAER	25	874.427	3	Anatase_10x_LA_1_f10498	Anatase	10x	LA	1	1	7.59	4.537	0.012	0.507
sp|Q9Y3X0|CCDC9_HUMAN	DGPVPAHEPSHR	12	649.817	2	Anatase_10x_LA_1_f10498	Anatase	10x	LA	1	0	2.66	2.292	0.482	0.482
sp|P63244|RACK1_HUMAN	DGQAMLWDLNEGK	13	738.845	2	Anatase_10x_LA_1_f10498	Anatase	10x	LA	1	0	3.09	3.444	0.475	0.475
sp|Q9NWH9|SLTM_HUMAN	DGQDAIAQS#PEK	12	669.784	2	Anatase_10x_LA_1_f10498	Anatase	10x	LA	1	1	2.7	2.863	0.249	0.249
sp|Q14151|SAFB2_HUMAN	DGQHYGDDRHGHGGPPER	18	497.47	4	Anatase_10x_LA_1_f10498	Anatase	10x	LA	1	0	2.07	2.956	0.497	0.497
sp|Q9P258|RCC2_HUMAN	DGQILPVPNVVVR	13	703.414	2	Anatase_10x_LA_1_f10498	Anatase	10x	LA	1	0	3.56	2.042	0.38	0.38
sp|Q9P2J5|SYLC_HUMAN	DGQPCM*DHDRQTGEGVGPQEYTLLK	25	949.763	3	Anatase_10x_LA_1_f10498	Anatase	10x	LA	1	0	2.29	4.1	0.507	0.507
sp|Q9P2J5|SYLC_HUMAN	DGQPCM*DHDRQTGEGVGPQEYTLLK	25	949.763	3	Anatase_10x_LA_1_f10498	Anatase	10x	LA	1	0	2.23	3.842	0.451	0.451
sp|Q9P2J5|SYLC_HUMAN	DGQPCMDHDRQTGEGVGPQEYTLLK	25	944.433	3	Anatase_10x_LA_1_f10498	Anatase	10x	LA	1	0	3.97	2.49	0.296	0.296
sp|Q9P2J5|SYLC_HUMAN	DGQPCMDHDRQTGEGVGPQEYTLLK	25	708.575	4	Anatase_10x_LA_1_f10498	Anatase	10x	LA	1	0	2.71	2.765	0.213	0.213
sp|Q9P2J5|SYLC_HUMAN	DGQPCMDHDRQTGEGVGPQEYTLLK	25	944.431	3	Anatase_10x_LA_1_f10498	Anatase	10x	LA	1	0	2.68	4.362	0.572	0.572
sp|Q15061|WDR43_HUMAN	DGQVHLFEHILNGYCK	16	643.983	3	Anatase_10x_LA_1_f10498	Anatase	10x	LA	1	0	3.19	3.535	0.481	0.481
sp|Q15061|WDR43_HUMAN	DGQVHLFEHILNGYCK	16	965.471	2	Anatase_10x_LA_1_f10498	Anatase	10x	LA	1	0	3.65	4.532	0.619	0.619
sp|P08670|VIME_HUMAN	DGQVINETSQHHDDLE	16	918.906	2	Anatase_10x_LA_1_f10498	Anatase	10x	LA	1	0	2.44	3.648	0.561	0.561
sp|P08670|VIME_HUMAN	DGQVINETSQHHDDLE	16	612.939	3	Anatase_10x_LA_1_f10498	Anatase	10x	LA	1	0	2.02	1.613	0.235	0.235
sp|Q08J23|NSUN2_HUMAN	DGQWFTDWDAVPHSR	15	606.274	3	Anatase_10x_LA_1_f10498	Anatase	10x	LA	1	0	1.99	3.395	0.406	0.406
sp|P17600|SYN1_HUMAN	DGRDHIIEVVGSSMPLIGDHQDEDK	25	691.335	4	Anatase_10x_LA_1_f10498	Anatase	10x	LA	1	0	4.93	2.373	0.325	0.325
sp|P17600|SYN1_HUMAN	DGRDHIIEVVGSSMPLIGDHQDEDK	25	921.446	3	Anatase_10x_LA_1_f10498	Anatase	10x	LA	1	0	6.9	4.503	0.337	0.337
sp|Q9HC35|EMAL4_HUMAN	DGRPLQPHVR	10	392.22	3	Anatase_10x_LA_1_f10498	Anatase	10x	LA	1	0	1.85	2.459	0.377	0.377
sp|Q9HC35|EMAL4_HUMAN	DGRPLQPHVR	10	587.828	2	Anatase_10x_LA_1_f10498	Anatase	10x	LA	1	0	3.48	1.921	0.184	0.184
sp|P55265|DSRAD_HUMAN	DGSAFEDGLRHPFIVNHPK	19	534.772	4	Anatase_10x_LA_1_f10498	Anatase	10x	LA	1	0	1.64	1.961	0.201	0.201
sp|P55265|DSRAD_HUMAN	DGSAFEDGLRHPFIVNHPK	19	712.694	3	Anatase_10x_LA_1_f10498	Anatase	10x	LA	1	0	2	3.888	0.56	0.56
sp|P21333|FLNA_HUMAN	DGSCSVEYIPYEAGTYSLNVTYGGHQVPGSPFK	33	1193.89	3	Anatase_10x_LA_1_f10498	Anatase	10x	LA	1	0	3.49	3.597	0.439	0.439
sp|P21333|FLNA_HUMAN	DGSCSVEYIPYEAGTYSLNVTYGGHQVPGSPFK	33	1193.89	3	Anatase_10x_LA_1_f10498	Anatase	10x	LA	1	0	3.22	3.435	0.363	0.363
sp|Q9H6S0|YTDC2_HUMAN	DGSETAHAMMTCNLTHNTK	19	706.974	3	Anatase_10x_LA_1_f10498	Anatase	10x	LA	1	0	2.88	4.142	0.508	0.508
sp|Q08752|PPID_HUMAN	DGSGDSHPDFPEDADIDLK	19	677.293	3	Anatase_10x_LA_1_f10498	Anatase	10x	LA	1	0	1.85	2.891	0.282	0.282
sp|O75419|CDC45_HUMAN	DGSGTDHFIQALDSLSR	17	909.938	2	Anatase_10x_LA_1_f10498	Anatase	10x	LA	1	0	3.54	1.996	0.354	0.354
sp|O75419|CDC45_HUMAN	DGSGTDHFIQALDSLSR	17	606.961	3	Anatase_10x_LA_1_f10498	Anatase	10x	LA	1	0	2.91	4.904	0.345	0.345
sp|O75419|CDC45_HUMAN	DGSGTDHFIQALDSLSR	17	909.938	2	Anatase_10x_LA_1_f10498	Anatase	10x	LA	1	0	3.69	3.141	0.612	0.612
sp|P15822|ZEP1_HUMAN	DGSHPHQLALSDALR	15	539.61	3	Anatase_10x_LA_1_f10498	Anatase	10x	LA	1	0	1.59	3.179	0.295	0.295
sp|Q8NCP5|ZBT44_HUMAN	DGSIS#PVSSECSVVER	16	894.38	2	Anatase_10x_LA_1_f10498	Anatase	10x	LA	1	1	0.59	1.665	0.181	0.35
sp|Q15910|EZH2_HUMAN	DGSSNHVYNYQPCDHPR	17	682.624	3	Anatase_10x_LA_1_f10498	Anatase	10x	LA	1	0	2.48	3.233	0.326	0.326
sp|Q15910|EZH2_HUMAN	DGSSNHVYNYQPCDHPR	17	512.22	4	Anatase_10x_LA_1_f10498	Anatase	10x	LA	1	0	2.62	2.808	0.445	0.445
sp|Q15910|EZH2_HUMAN	DGSSNHVYNYQPCDHPR	17	1023.43	2	Anatase_10x_LA_1_f10498	Anatase	10x	LA	1	0	2.86	3.659	0.563	0.563
sp|Q92994|TF3B_HUMAN	DGSTEDTASSLCGEEDT#EDEELEAAASHLNK	31	1130.78	3	Anatase_10x_LA_1_f10498	Anatase	10x	LA	1	1	2.27	6.145	0.255	0.588
sp|Q9UKS6|PACN3_HUMAN	DGTAPPPQSPGS#PGTGQDEEWSDEESPRK	29	1040.1	3	Anatase_10x_LA_1_f10498	Anatase	10x	LA	1	1	2.93	2.495	0.071	0.242
sp|P23771|GATA3_HUMAN	DGTGHYLCNACGLYHK	16	622.607	3	Anatase_10x_LA_1_f10498	Anatase	10x	LA	1	0	1.14	4.494	0.475	0.475
sp|P23771|GATA3_HUMAN	DGTGHYLCNACGLYHK	16	933.409	2	Anatase_10x_LA_1_f10498	Anatase	10x	LA	1	0	3.1	3.246	0.628	0.628
sp|Q8NCD3|HJURP_HUMAN	DGTRDHQFPAK	11	636.312	2	Anatase_10x_LA_1_f10498	Anatase	10x	LA	1	0	2.63	2.083	0.247	0.247
sp|O75369|FLNB_HUMAN	DGTYAVTYIPDK	12	671.832	2	Anatase_10x_LA_1_f10498	Anatase	10x	LA	1	0	3.45	2.026	0.408	0.408
sp|P00441|SODC_HUMAN	DGVADVSIEDSVISLSGDHCIIGR	24	838.746	3	Anatase_10x_LA_1_f10498	Anatase	10x	LA	1	0	4.01	2.601	0.38	0.38
sp|P00441|SODC_HUMAN	DGVADVSIEDSVISLSGDHCIIGR	24	1257.62	2	Anatase_10x_LA_1_f10498	Anatase	10x	LA	1	0	5.56	4.644	0.583	0.583
sp|P00441|SODC_HUMAN	DGVADVSIEDSVISLSGDHCIIGR	24	1257.61	2	Anatase_10x_LA_1_f10498	Anatase	10x	LA	1	0	2.4	4.259	0.504	0.504
sp|Q5SRE5|NU188_HUMAN	DGVCVLGLHLAK	12	427.906	3	Anatase_10x_LA_1_f10498	Anatase	10x	LA	1	0	3.18	2.392	0.393	0.393
sp|P27816|MAP4_HUMAN	DGVLTLANNVT#PAK	14	746.876	2	Anatase_10x_LA_1_f10498	Anatase	10x	LA	1	1	2.79	3.261	0.457	0.457
sp|P16989|YBOX3_HUMAN	DGVPEGAQLQGPVHR	15	780.402	2	Anatase_10x_LA_1_f10498	Anatase	10x	LA	1	0	3.01	2.841	0.457	0.457
sp|P61586|RHOA_HUMAN	DGVREVFEMATR	12	470.567	3	Anatase_10x_LA_1_f10498	Anatase	10x	LA	1	0	1.94	3.546	0.477	0.477
sp|Q9UKV8|AGO2_HUMAN	DGVSEGQFQQVLHHELLAIR	20	759.4	3	Anatase_10x_LA_1_f10498	Anatase	10x	LA	1	0	2.57	3.763	0.443	0.443
sp|Q9UKV8|AGO2_HUMAN	DGVSEGQFQQVLHHELLAIR	20	569.801	4	Anatase_10x_LA_1_f10498	Anatase	10x	LA	1	0	1.96	2.353	0.283	0.283
sp|P07237|PDIA1_HUMAN	DGVVLFK	7	389.23	2	Anatase_10x_LA_1_f10498	Anatase	10x	LA	1	0	2.17	2.301	0.297	0.297
sp|P30520|PURA2_HUMAN	DGVYFLYEALHGPPKK	16	611.991	3	Anatase_10x_LA_1_f10498	Anatase	10x	LA	1	0	2.86	2.549	0.534	0.534
sp|P30520|PURA2_HUMAN	DGVYFLYEALHGPPKK	16	459.245	4	Anatase_10x_LA_1_f10498	Anatase	10x	LA	1	0	2.27	3.378	0.301	0.301
sp|P53396|ACLY_HUMAN	DGVYVLDLAAK	11	582.32	2	Anatase_10x_LA_1_f10498	Anatase	10x	LA	1	0	2.26	3.255	0.453	0.453
sp|Q15424|SAFB1_HUMAN	DGWGGYGSDK	10	521.219	2	Anatase_10x_LA_1_f10498	Anatase	10x	LA	1	0	2.83	1.661	0.135	0.135
sp|P17844|DDX5_HUMAN	DGWPAM*GIHGDK	12	650.294	2	Anatase_10x_LA_1_f10498	Anatase	10x	LA	1	0	2.33	1.679	0.142	0.142
sp|Q92841|DDX17_HUMAN	DGWPAMCIHGDK	12	462.87	3	Anatase_10x_LA_1_f10498	Anatase	10x	LA	1	0	1.56	1.373	0.22	0.22
sp|Q92841|DDX17_HUMAN	DGWPAMCIHGDK	12	693.802	2	Anatase_10x_LA_1_f10498	Anatase	10x	LA	1	0	2.88	1.575	0.224	0.224
sp|P17844|DDX5_HUMAN	DGWPAMGIHGDK	12	428.534	3	Anatase_10x_LA_1_f10498	Anatase	10x	LA	1	0	1.71	1.589	0.214	0.214
sp|Q96T37|RBM15_HUMAN	DGWSLDRDRGDR	12	483.228	3	Anatase_10x_LA_1_f10498	Anatase	10x	LA	1	0	1.64	2.276	0.223	0.223
sp|Q8TAP9|MPLKI_HUMAN	DGYGS#PHHT#PPYGPR	15	899.346	2	Anatase_10x_LA_1_f10498	Anatase	10x	LA	1	1	3.34	1.323	0.187	0.301
sp|P55160|NCKPL_HUMAN	DGYNNNIHCLTK	12	724.835	2	Anatase_10x_LA_1_f10498	Anatase	10x	LA	1	0	3.2	3.105	0.493	0.493
sp|P55160|NCKPL_HUMAN	DGYNNNIHCLTK	12	483.559	3	Anatase_10x_LA_1_f10498	Anatase	10x	LA	1	0	2.09	1.597	0.236	0.236
sp|P49189|AL9A1_HUMAN	DGYYMRPCVLTNCRDDMTCVK	21	885.383	3	Anatase_10x_LA_1_f10498	Anatase	10x	LA	1	0	2.64	2.87	0.321	0.321
sp|P29083|T2EA_HUMAN	DHAATTAGAASLAGGHHR	18	850.916	2	Anatase_10x_LA_1_f10498	Anatase	10x	LA	1	0	2.53	4.534	0.702	0.702
sp|P29083|T2EA_HUMAN	DHAATTAGAASLAGGHHR	18	850.917	2	Anatase_10x_LA_1_f10498	Anatase	10x	LA	1	0	2.72	4.161	0.69	0.69
sp|P62491|RB11A_HUMAN	DHADSNIVIMLVGNK	15	542.619	3	Anatase_10x_LA_1_f10498	Anatase	10x	LA	1	0	7.2	4.48	0.288	0.288
sp|P62491|RB11A_HUMAN	DHADSNIVIMLVGNK	15	813.422	2	Anatase_10x_LA_1_f10498	Anatase	10x	LA	1	0	3.02	4.043	0.59	0.59
sp|P21281|VATB2_HUMAN	DHADVSNQLYACYAIGK	17	642.302	3	Anatase_10x_LA_1_f10498	Anatase	10x	LA	1	0	2.83	4.37	0.444	0.444
sp|P21281|VATB2_HUMAN	DHADVSNQLYACYAIGK	17	962.948	2	Anatase_10x_LA_1_f10498	Anatase	10x	LA	1	0	1.39	2.438	0.267	0.267
sp|P16885|PLCG2_HUMAN	DHAFVTSSFPVILSIEEHCSVEQQR	25	972.478	3	Anatase_10x_LA_1_f10498	Anatase	10x	LA	1	0	7.21	4.4	0.456	0.456
sp|P16885|PLCG2_HUMAN	DHAFVTSSFPVILSIEEHCSVEQQR	25	972.476	3	Anatase_10x_LA_1_f10498	Anatase	10x	LA	1	0	4.48	2.607	0.273	0.273
sp|O15117|FYB_HUMAN	DHAGEISSLPFPGVVLK	17	589.324	3	Anatase_10x_LA_1_f10498	Anatase	10x	LA	1	0	4.41	3.659	0.545	0.545
sp|O15117|FYB_HUMAN	DHAGEISSLPFPGVVLK	17	883.48	2	Anatase_10x_LA_1_f10498	Anatase	10x	LA	1	0	2.77	4.242	0.628	0.628
sp|O15117|FYB_HUMAN	DHAGEISSLPFPGVVLKPAASR	22	750.077	3	Anatase_10x_LA_1_f10498	Anatase	10x	LA	1	0	3.15	5.181	0.68	0.68
sp|P52306|GDS1_HUMAN	DHAGVMGESNR	11	586.761	2	Anatase_10x_LA_1_f10498	Anatase	10x	LA	1	0	2.25	2.565	0.591	0.591
sp|P52306|GDS1_HUMAN	DHAGVMGESNR	11	391.509	3	Anatase_10x_LA_1_f10498	Anatase	10x	LA	1	0	1.59	2.331	0.179	0.179
sp|P63220|RS21_HUMAN	DHASIQM*NVAEVDK	14	786.872	2	Anatase_10x_LA_1_f10498	Anatase	10x	LA	1	0	2.37	2.388	0.249	0.249
sp|P63220|RS21_HUMAN	DHASIQMNVAEVDK	14	778.874	2	Anatase_10x_LA_1_f10498	Anatase	10x	LA	1	0	2.42	4	0.509	0.509
sp|P63220|RS21_HUMAN	DHASIQMNVAEVDK	14	519.585	3	Anatase_10x_LA_1_f10498	Anatase	10x	LA	1	0	1.37	3.631	0.435	0.435
sp|P48509|CD151_HUMAN	DHASNIYK	8	474.233	2	Anatase_10x_LA_1_f10498	Anatase	10x	LA	1	0	1.62	1.939	0.219	0.219
sp|P31689|DNJA1_HUMAN	DHAVFTR	7	423.218	2	Anatase_10x_LA_1_f10498	Anatase	10x	LA	1	0	1.76	1.366	0.359	0.359
sp|P22087|FBRL_HUMAN	DHAVVVGVYRPPPK	14	511.957	3	Anatase_10x_LA_1_f10498	Anatase	10x	LA	1	0	1.83	3.672	0.592	0.592
sp|P22087|FBRL_HUMAN	DHAVVVGVYRPPPK	14	767.432	2	Anatase_10x_LA_1_f10498	Anatase	10x	LA	1	0	2.42	3.675	0.633	0.633
sp|Q9UG22|GIMA2_HUMAN	DHCEALYK	8	518.233	2	Anatase_10x_LA_1_f10498	Anatase	10x	LA	1	0	1.89	1.86	0.231	0.231
sp|Q5TA45|INT11_HUMAN	DHCVQHLPDGSVTVESVLLQAAAPSEDPGTK	31	1086.53	3	Anatase_10x_LA_1_f10498	Anatase	10x	LA	1	0	3.65	3.639	0.503	0.503
sp|Q5TA45|INT11_HUMAN	DHCVQHLPDGSVTVESVLLQAAAPSEDPGTK	31	815.152	4	Anatase_10x_LA_1_f10498	Anatase	10x	LA	1	0	3.86	2.955	0.336	0.336
sp|Q93009|UBP7_HUMAN	DHDVMLFLK	9	559.29	2	Anatase_10x_LA_1_f10498	Anatase	10x	LA	1	0	2.36	2.166	0.461	0.461
sp|Q93008|USP9X_HUMAN	DHEDYDPQTVR	11	687.801	2	Anatase_10x_LA_1_f10498	Anatase	10x	LA	1	0	2.34	2.332	0.423	0.423
sp|Q5T4S7|UBR4_HUMAN	DHEISYAK	8	481.734	2	Anatase_10x_LA_1_f10498	Anatase	10x	LA	1	0	2.18	1.966	0.369	0.369
sp|P07237|PDIA1_HUMAN	DHENIVIAK	9	519.784	2	Anatase_10x_LA_1_f10498	Anatase	10x	LA	1	0	2.1	2.535	0.357	0.357
sp|O60524|NEMF_HUMAN	DHENRLEALQQAQEIDK	17	1019.01	2	Anatase_10x_LA_1_f10498	Anatase	10x	LA	1	0	1.88	2.16	0.242	0.242
sp|O60524|NEMF_HUMAN	DHENRLEALQQAQEIDK	17	679.673	3	Anatase_10x_LA_1_f10498	Anatase	10x	LA	1	0	2.36	5.353	0.531	0.531
sp|O60524|NEMF_HUMAN	DHENRLEALQQAQEIDK	17	1019	2	Anatase_10x_LA_1_f10498	Anatase	10x	LA	1	0	1.5	4.298	0.58	0.58
sp|O60524|NEMF_HUMAN	DHENRLEALQQAQEIDK	17	510.006	4	Anatase_10x_LA_1_f10498	Anatase	10x	LA	1	0	1.97	2.941	0.19	0.19
sp|P48736|PK3CG_HUMAN	DHESVFTVSLWDCDRK	16	665.31	3	Anatase_10x_LA_1_f10498	Anatase	10x	LA	1	0	3.57	3.594	0.43	0.43
sp|P98170|XIAP_HUMAN	DHFALDRPSETHADYLLR	18	539.77	4	Anatase_10x_LA_1_f10498	Anatase	10x	LA	1	0	2.08	2.871	0.52	0.52
sp|P55072|TERA_HUMAN	DHFEEAMR	8	517.723	2	Anatase_10x_LA_1_f10498	Anatase	10x	LA	1	0	2.24	2.018	0.326	0.326
sp|O43776|SYNC_HUMAN	DHFFDR	6	418.689	2	Anatase_10x_LA_1_f10498	Anatase	10x	LA	1	0	1.64	1.55	0.147	0.147
sp|Q9Y490|TLN1_HUMAN	DHFGLEGDEESTM*LEDSVS#PKK	22	1273.54	2	Anatase_10x_LA_1_f10498	Anatase	10x	LA	1	1	2.44	1.957	0.05	0.338
sp|Q9Y490|TLN1_HUMAN	DHFGLEGDEESTM*LEDSVS#PKK	22	849.362	3	Anatase_10x_LA_1_f10498	Anatase	10x	LA	1	1	2.47	2.677	0.111	0.281
sp|Q9Y490|TLN1_HUMAN	DHFGLEGDEESTM*LEDSVS#PKK	22	849.362	3	Anatase_10x_LA_1_f10498	Anatase	10x	LA	1	1	2.99	3.209	0.089	0.517
sp|Q9Y490|TLN1_HUMAN	DHFGLEGDEESTM*LEDSVSPKK	22	822.706	3	Anatase_10x_LA_1_f10498	Anatase	10x	LA	1	0	2.82	4.875	0.682	0.682
sp|Q9Y490|TLN1_HUMAN	DHFGLEGDEESTMLEDS#VSPKK	22	1265.54	2	Anatase_10x_LA_1_f10498	Anatase	10x	LA	1	1	2.53	4.447	0.008	0.537
sp|Q9Y490|TLN1_HUMAN	DHFGLEGDEESTMLEDSVSPK	21	774.676	3	Anatase_10x_LA_1_f10498	Anatase	10x	LA	1	0	2.86	3.539	0.391	0.391
sp|Q9Y490|TLN1_HUMAN	DHFGLEGDEESTMLEDSVSPK	21	1161.51	2	Anatase_10x_LA_1_f10498	Anatase	10x	LA	1	0	4.05	2.664	0.411	0.411
sp|Q9Y490|TLN1_HUMAN	DHFGLEGDEESTMLEDSVSPKK	22	817.375	3	Anatase_10x_LA_1_f10498	Anatase	10x	LA	1	0	3.1	5.318	0.646	0.646
sp|Q9Y490|TLN1_HUMAN	DHFGLEGDEESTMLEDSVSPKK	22	1225.56	2	Anatase_10x_LA_1_f10498	Anatase	10x	LA	1	0	3.64	2.521	0.365	0.365
sp|Q9Y490|TLN1_HUMAN	DHFGLEGDEESTMLEDSVSPKK	22	1225.56	2	Anatase_10x_LA_1_f10498	Anatase	10x	LA	1	0	2.92	3.592	0.514	0.514
sp|Q9UPN6|SCAF8_HUMAN	DHFGRPPVDIR	11	436.899	3	Anatase_10x_LA_1_f10498	Anatase	10x	LA	1	0	0.86	1.924	0.35	0.35
sp|Q6P2Q9|PRP8_HUMAN	DHGDM*TNRK	9	545.243	2	Anatase_10x_LA_1_f10498	Anatase	10x	LA	1	0	4.06	1.473	0.267	0.267
sp|Q6P2Q9|PRP8_HUMAN	DHGDM*TNRK	9	545.243	2	Anatase_10x_LA_1_f10498	Anatase	10x	LA	1	0	3.3	1.119	0.458	0.458
sp|Q6P2Q9|PRP8_HUMAN	DHGDM*TNRK	9	545.243	2	Anatase_10x_LA_1_f10498	Anatase	10x	LA	1	0	3.43	1.205	0.495	0.495
sp|O43707|ACTN4_HUMAN	DHGGALGPEEFK	12	419.536	3	Anatase_10x_LA_1_f10498	Anatase	10x	LA	1	0	1.65	2.65	0.233	0.233
sp|Q96DE0|NUD16_HUMAN	DHGLEVLGLVR	11	604.345	2	Anatase_10x_LA_1_f10498	Anatase	10x	LA	1	0	2.24	1.47	0.36	0.36
sp|Q96DE0|NUD16_HUMAN	DHGLEVLGLVR	11	604.345	2	Anatase_10x_LA_1_f10498	Anatase	10x	LA	1	0	2.32	2.682	0.522	0.522
sp|Q8IU81|I2BP1_HUMAN	DHGLVGR	7	377.204	2	Anatase_10x_LA_1_f10498	Anatase	10x	LA	1	0	1.94	1.602	0.221	0.221
sp|Q9H081|MIS12_HUMAN	DHGTSDFRESLVSLVQNSR	19	716.356	3	Anatase_10x_LA_1_f10498	Anatase	10x	LA	1	0	2.78	3.36	0.536	0.536
sp|Q8WVQ1|CANT1_HUMAN	DHGVLESHLAEK	12	445.559	3	Anatase_10x_LA_1_f10498	Anatase	10x	LA	1	0	-5.48	3.017	0.442	0.442
sp|Q8WVQ1|CANT1_HUMAN	DHGVLESHLAEK	12	667.841	2	Anatase_10x_LA_1_f10498	Anatase	10x	LA	1	0	3.09	2.912	0.543	0.543
sp|Q16555|DPYL2_HUMAN	DHGVNSFLVYMAFK	14	543.271	3	Anatase_10x_LA_1_f10498	Anatase	10x	LA	1	0	3.24	3.74	0.42	0.42
sp|Q16555|DPYL2_HUMAN	DHGVNSFLVYMAFK	14	814.404	2	Anatase_10x_LA_1_f10498	Anatase	10x	LA	1	0	3.7	2.34	0.451	0.451
sp|Q12824|SNF5_HUMAN	DHGYTTLATSVTLLK	15	540.628	3	Anatase_10x_LA_1_f10498	Anatase	10x	LA	1	0	2.78	3.041	0.441	0.441
sp|Q12824|SNF5_HUMAN	DHGYTTLATSVTLLK	15	810.439	2	Anatase_10x_LA_1_f10498	Anatase	10x	LA	1	0	3.86	2.289	0.464	0.464
sp|Q9P032|NDUF4_HUMAN	DHHFDM*INIK	10	429.205	3	Anatase_10x_LA_1_f10498	Anatase	10x	LA	1	0	1.45	1.873	0.144	0.144
sp|Q9P032|NDUF4_HUMAN	DHHFDMINIK	10	423.874	3	Anatase_10x_LA_1_f10498	Anatase	10x	LA	1	0	1.55	3.515	0.265	0.265
sp|Q9P032|NDUF4_HUMAN	DHHFDMINIK	10	635.307	2	Anatase_10x_LA_1_f10498	Anatase	10x	LA	1	0	2.35	2.164	0.452	0.452
sp|Q96T76|MMS19_HUMAN	DHHLVIPSVLQGLK	14	519.305	3	Anatase_10x_LA_1_f10498	Anatase	10x	LA	1	0	4.11	2.576	0.276	0.276
sp|Q96T76|MMS19_HUMAN	DHHLVIPSVLQGLK	14	778.455	2	Anatase_10x_LA_1_f10498	Anatase	10x	LA	1	0	4.29	2.934	0.459	0.459
sp|P46087|NOP2_HUMAN	DHHQPLGR	8	480.245	2	Anatase_10x_LA_1_f10498	Anatase	10x	LA	1	0	2.12	1.736	0.211	0.211
sp|O60306|AQR_HUMAN	DHIKDEWEGLRK	12	509.264	3	Anatase_10x_LA_1_f10498	Anatase	10x	LA	1	0	1.38	2.776	0.4	0.4
sp|Q15287|RNPS1_HUMAN	DHIM*EIFSTYGK	12	728.844	2	Anatase_10x_LA_1_f10498	Anatase	10x	LA	1	0	1.63	2.451	0.332	0.332
sp|Q15287|RNPS1_HUMAN	DHIMEIFSTYGK	12	720.847	2	Anatase_10x_LA_1_f10498	Anatase	10x	LA	1	0	2.51	3.346	0.569	0.569
sp|Q15287|RNPS1_HUMAN	DHIMEIFSTYGK	12	480.9	3	Anatase_10x_LA_1_f10498	Anatase	10x	LA	1	0	1.99	3.256	0.338	0.338
sp|Q9NUP7|TRM13_HUMAN	DHIMSHPALHDALNDPK	17	637.645	3	Anatase_10x_LA_1_f10498	Anatase	10x	LA	1	0	2.15	3.159	0.522	0.522
sp|P46940|IQGA1_HUMAN	DHINDIIK	8	484.265	2	Anatase_10x_LA_1_f10498	Anatase	10x	LA	1	0	1.49	2.036	0.415	0.415
sp|P00491|PNPH_HUMAN	DHINLPGFSGQNPLR	15	555.623	3	Anatase_10x_LA_1_f10498	Anatase	10x	LA	1	0	2.21	4.841	0.514	0.514
sp|P00491|PNPH_HUMAN	DHINLPGFSGQNPLR	15	832.931	2	Anatase_10x_LA_1_f10498	Anatase	10x	LA	1	0	2.77	3.056	0.49	0.49
sp|P00491|PNPH_HUMAN	DHINLPGFSGQNPLRGPNDER	21	778.386	3	Anatase_10x_LA_1_f10498	Anatase	10x	LA	1	0	2.6	2.447	0.28	0.28
sp|P00491|PNPH_HUMAN	DHINLPGFSGQNPLRGPNDER	21	584.042	4	Anatase_10x_LA_1_f10498	Anatase	10x	LA	1	0	2.61	3.601	0.361	0.361
sp|O75694|NU155_HUMAN	DHIPITDSPVVVQQHM*LPPK	20	756.403	3	Anatase_10x_LA_1_f10498	Anatase	10x	LA	1	0	4.23	2.252	0.39	0.39
sp|O75694|NU155_HUMAN	DHIPITDSPVVVQQHM*LPPKK	21	599.577	4	Anatase_10x_LA_1_f10498	Anatase	10x	LA	1	0	2.61	3.542	0.454	0.454
sp|O75694|NU155_HUMAN	DHIPITDSPVVVQQHM*LPPKK	21	599.577	4	Anatase_10x_LA_1_f10498	Anatase	10x	LA	1	0	2.63	3.297	0.469	0.469
sp|O75694|NU155_HUMAN	DHIPITDSPVVVQQHMLPPK	20	751.071	3	Anatase_10x_LA_1_f10498	Anatase	10x	LA	1	0	3.16	2.848	0.492	0.492
sp|O75694|NU155_HUMAN	DHIPITDSPVVVQQHMLPPK	20	751.07	3	Anatase_10x_LA_1_f10498	Anatase	10x	LA	1	0	2.03	2.971	0.536	0.536
sp|O75694|NU155_HUMAN	DHIPITDSPVVVQQHMLPPK	20	751.071	3	Anatase_10x_LA_1_f10498	Anatase	10x	LA	1	0	3.04	2.729	0.343	0.343
sp|O75694|NU155_HUMAN	DHIPITDSPVVVQQHMLPPKK	21	793.769	3	Anatase_10x_LA_1_f10498	Anatase	10x	LA	1	0	3.51	2.216	0.352	0.352
sp|O75694|NU155_HUMAN	DHIPITDSPVVVQQHMLPPKK	21	595.578	4	Anatase_10x_LA_1_f10498	Anatase	10x	LA	1	0	2.76	3.93	0.306	0.306
sp|O75694|NU155_HUMAN	DHIPITDSPVVVQQHMLPPKK	21	793.769	3	Anatase_10x_LA_1_f10498	Anatase	10x	LA	1	0	3.24	2.149	0.447	0.447
sp|P49643|PRI2_HUMAN	DHISHFILR	9	379.878	3	Anatase_10x_LA_1_f10498	Anatase	10x	LA	1	0	1.85	2.807	0.443	0.443
sp|P49643|PRI2_HUMAN	DHISHFILR	9	569.313	2	Anatase_10x_LA_1_f10498	Anatase	10x	LA	1	0	2.36	2.034	0.231	0.231
sp|Q8IUF8|MINA_HUMAN	DHIVLTVLPDQDQSDEAQEK	20	1140.56	2	Anatase_10x_LA_1_f10498	Anatase	10x	LA	1	0	3	3.336	0.442	0.442
sp|Q8IUF8|MINA_HUMAN	DHIVLTVLPDQDQSDEAQEK	20	760.707	3	Anatase_10x_LA_1_f10498	Anatase	10x	LA	1	0	2.89	4.273	0.478	0.478
sp|Q9BQ67|GRWD1_HUMAN	DHLGDNRTELPLTLYLCAGTQAESAQSNR	29	1077.52	3	Anatase_10x_LA_1_f10498	Anatase	10x	LA	1	0	2.47	4.999	0.361	0.361
sp|Q9BQ67|GRWD1_HUMAN	DHLGDNRTELPLTLYLCAGTQAESAQSNR	29	808.396	4	Anatase_10x_LA_1_f10498	Anatase	10x	LA	1	0	3.78	5.991	0.578	0.578
sp|Q9BQ67|GRWD1_HUMAN	DHLGDNRTELPLTLYLCAGTQAESAQSNR	29	1077.52	3	Anatase_10x_LA_1_f10498	Anatase	10x	LA	1	0	3.1	6.282	0.571	0.571
sp|Q8IWR0|Z3H7A_HUMAN	DHLIGPNDNDFGK	13	721.341	2	Anatase_10x_LA_1_f10498	Anatase	10x	LA	1	0	2.63	2.591	0.226	0.226
sp|Q8N302|AGGF1_HUMAN	DHLQVENDAYPGTDRTENVK	20	767.698	3	Anatase_10x_LA_1_f10498	Anatase	10x	LA	1	0	2.19	4.23	0.506	0.506
sp|Q13363|CTBP1_HUMAN	DHLTAATHWASMDPAVVHPELNGAAYR	27	733.358	4	Anatase_10x_LA_1_f10498	Anatase	10x	LA	1	0	3.44	2.636	0.31	0.31
sp|Q99798|ACON_HUMAN	DHLVPDPGCHYDQLIEINLSELK	23	677.09	4	Anatase_10x_LA_1_f10498	Anatase	10x	LA	1	0	5.61	4.052	0.299	0.299
sp|Q00688|FKBP3_HUMAN	DHLVTAYNHLFETK	14	563.288	3	Anatase_10x_LA_1_f10498	Anatase	10x	LA	1	0	2.44	3.987	0.572	0.572
sp|Q00688|FKBP3_HUMAN	DHLVTAYNHLFETK	14	422.717	4	Anatase_10x_LA_1_f10498	Anatase	10x	LA	1	0	1.58	2.579	0.412	0.412
sp|Q00688|FKBP3_HUMAN	DHLVTAYNHLFETK	14	844.427	2	Anatase_10x_LA_1_f10498	Anatase	10x	LA	1	0	2.14	4.52	0.627	0.627
sp|Q00688|FKBP3_HUMAN	DHLVTAYNHLFETK	14	563.288	3	Anatase_10x_LA_1_f10498	Anatase	10x	LA	1	0	2.87	2.566	0.475	0.475
sp|Q14204|DYHC1_HUMAN	DHLYGTLDPNTR	12	701.343	2	Anatase_10x_LA_1_f10498	Anatase	10x	LA	1	0	2.44	2.919	0.538	0.538
sp|O60832|DKC1_HUMAN	DHM*VTM*HDVLDAQWLYDNHK	20	625.783	4	Anatase_10x_LA_1_f10498	Anatase	10x	LA	1	0	2.67	4.111	0.479	0.479
sp|O60832|DKC1_HUMAN	DHM*VTM*HDVLDAQWLYDNHK	20	834.041	3	Anatase_10x_LA_1_f10498	Anatase	10x	LA	1	0	2.84	4.225	0.612	0.612
sp|O60832|DKC1_HUMAN	DHM*VTMHDVLDAQWLYDNHK	20	621.784	4	Anatase_10x_LA_1_f10498	Anatase	10x	LA	1	0	2.69	3.527	0.007	0.44
sp|O60832|DKC1_HUMAN	DHM*VTMHDVLDAQWLYDNHK	20	621.785	4	Anatase_10x_LA_1_f10498	Anatase	10x	LA	1	0	4.57	4.922	0.02	0.566
sp|O60832|DKC1_HUMAN	DHM*VTMHDVLDAQWLYDNHK	20	497.628	5	Anatase_10x_LA_1_f10498	Anatase	10x	LA	1	0	1.92	3.248	0.066	0.282
sp|Q9Y5L0|TNPO3_HUMAN	DHMAQHFNGLLEIAR	15	876.439	2	Anatase_10x_LA_1_f10498	Anatase	10x	LA	1	0	2.99	2.779	0.3	0.3
sp|Q9Y5L0|TNPO3_HUMAN	DHMAQHFNGLLEIAR	15	438.722	4	Anatase_10x_LA_1_f10498	Anatase	10x	LA	1	0	1.64	2.827	0.164	0.164
sp|O43432|IF4G3_HUMAN	DHMGQLLYQLVQSEK	15	596.973	3	Anatase_10x_LA_1_f10498	Anatase	10x	LA	1	0	5.87	3.57	0.362	0.362
sp|O43432|IF4G3_HUMAN	DHMGQLLYQLVQSEK	15	894.957	2	Anatase_10x_LA_1_f10498	Anatase	10x	LA	1	0	6.78	3.394	0.639	0.639
sp|O60832|DKC1_HUMAN	DHMVTM*HDVLDAQWLYDNHK	20	828.709	3	Anatase_10x_LA_1_f10498	Anatase	10x	LA	1	0	1.71	4.331	0.143	0.434
sp|O60832|DKC1_HUMAN	DHMVTM*HDVLDAQWLYDNHK	20	828.709	3	Anatase_10x_LA_1_f10498	Anatase	10x	LA	1	0	2.42	5.651	0.081	0.609
sp|O60832|DKC1_HUMAN	DHMVTM*HDVLDAQWLYDNHK	20	621.784	4	Anatase_10x_LA_1_f10498	Anatase	10x	LA	1	0	2.3	2.995	0.009	0.14
sp|O60832|DKC1_HUMAN	DHMVTMHDVLDAQWLYDNHK	20	823.382	3	Anatase_10x_LA_1_f10498	Anatase	10x	LA	1	0	7.4	4.876	0.582	0.582
sp|O60832|DKC1_HUMAN	DHMVTMHDVLDAQWLYDNHK	20	617.787	4	Anatase_10x_LA_1_f10498	Anatase	10x	LA	1	0	6.47	4.63	0.499	0.499
sp|Q96MG8|PCMD1_HUMAN	DHNEAMKPEEPPQNLLR	17	673.332	3	Anatase_10x_LA_1_f10498	Anatase	10x	LA	1	0	2.41	2.604	0.245	0.245
sp|Q32MZ4|LRRF1_HUMAN	DHNEEEGEETGLRDEKPIK	19	742.35	3	Anatase_10x_LA_1_f10498	Anatase	10x	LA	1	0	2.26	1.926	0.256	0.256
sp|Q32MZ4|LRRF1_HUMAN	DHNEEEGEETGLRDEKPIK	19	557.015	4	Anatase_10x_LA_1_f10498	Anatase	10x	LA	1	0	2.36	3.502	0.456	0.456
sp|P35580|MYH10_HUMAN	DHNIPGELER	10	393.864	3	Anatase_10x_LA_1_f10498	Anatase	10x	LA	1	0	1.72	2.729	0.384	0.384
sp|Q13576|IQGA2_HUMAN	DHNNEIVK	8	484.744	2	Anatase_10x_LA_1_f10498	Anatase	10x	LA	1	0	0.76	2.12	0.23	0.23
sp|O95391|SLU7_HUMAN	DHNS#EDEDEDKYADDIDM*PGQNFDSK	26	1042.39	3	Anatase_10x_LA_1_f10498	Anatase	10x	LA	1	1	3.45	3.679	0.241	0.494
sp|O95391|SLU7_HUMAN	DHNS#EDEDEDKYADDIDM*PGQNFDSK	26	1042.39	3	Anatase_10x_LA_1_f10498	Anatase	10x	LA	1	1	2.16	2.807	0.134	0.241
sp|O95391|SLU7_HUMAN	DHNS#EDEDEDKYADDIDM*PGQNFDSK	26	1042.39	3	Anatase_10x_LA_1_f10498	Anatase	10x	LA	1	1	1.96	5.255	0.338	0.678
sp|O95391|SLU7_HUMAN	DHNS#EDEDEDKYADDIDMPGQNFDSK	26	1037.06	3	Anatase_10x_LA_1_f10498	Anatase	10x	LA	1	1	2.43	5.668	0.325	0.566
sp|Q9NWU5|RM22_HUMAN	DHNVEFR	7	458.718	2	Anatase_10x_LA_1_f10498	Anatase	10x	LA	1	0	2.09	2.109	0.344	0.344
[truncated: 299,748+ more rows]

## Sheet: Dataset 2
Supplemental Dataset 2
ALL PSMs - CaTiO3 v. Titansphere, HeLa and Jurkat, trials 1-3
Reference	AScore Peptide	SEQUEST Sequence	rawAA	#sites	Pept. Length	Site 1 Position	Site 1 Score	Site 2 Position	Site 2 Score	Site 3 Position	Site 3 Score	signal-to-noise area	SrchName	cells	resin	trial	raw data file
sp|Q15424|SAFB1_HUMAN	K.SRDS#ESHSR.V	K.SRDS#ESHSR.V	SRDSESHSR	1	9	617	11.015	0	0	0	0	742.8	Jurkat_TiO2_1mg_3_f09350	Jurkat	TiO2	3	f09350
sp|P83916|CBX1_HUMAN	K.RKADS#DSEDK.G	K.RKADS#DSEDK.G	RKADSDSEDK	1	10	89	44.278	0	0	0	0	129.4	Jurkat_TiO2_1mg_3_f09350	Jurkat	TiO2	3	f09350
sp|Q9HC52|CBX8_HUMAN		R.DRDRDRDR.D	DRDRDRDR	0	8	0	0	0	0	0	0	230	Jurkat_TiO2_1mg_3_f09350	Jurkat	TiO2	3	f09350
sp|P26641|EF1G_HUMAN	K.KDT#PRK.E	K.KDT#PRK.E	KDTPRK	1	6	230	1000	0	0	0	0	146.3	Jurkat_TiO2_1mg_3_f09350	Jurkat	TiO2	3	f09350
sp|P16403|H12_HUMAN	K.KAGGT#PRK.A	K.KAGGT#PRK.A	KAGGTPRK	1	8	31	1000	0	0	0	0	223.6	Jurkat_TiO2_1mg_3_f09350	Jurkat	TiO2	3	f09350																												JC1	JC2	JC3	JT1	JT2
sp|Q9NYF8|BCLF1_HUMAN	R.RHS#RS#PR.R	R.RHS#RS#PR.R	RHSRSPR	2	7	102	1000	104	1000	0	0	5586.1	Jurkat_TiO2_1mg_3_f09350	Jurkat	TiO2	3	f09350																											phos	18240	18567	18472	18161	17941
sp|Q86X95|CIR1_HUMAN	R.THKHS#PEK.R	R.THKHS#PEK.R	THKHSPEK	1	8	365	48.315	0	0	0	0	283.1	Jurkat_TiO2_1mg_3_f09350	Jurkat	TiO2	3	f09350																											unphos	1292	1723	1738	1925	1510
sp|O76021|RL1D1_HUMAN	K.HATGKKS#PAK.S	K.HATGKKS#PAK.S	HATGKKSPAK	1	10	392	4.085	0	0	0	0	95.5	Jurkat_TiO2_1mg_3_f09350	Jurkat	TiO2	3	f09350
sp|Q7L014|DDX46_HUMAN	R.GRRS#RSS#S#PGNK.S	R.GRRS#RSS#S#PGNK.S	GRRSRSSSPGNK	3	12	102	0	105	9.34	106	17.009	592	Jurkat_TiO2_1mg_3_f09350	Jurkat	TiO2	3	f09350
sp|Q5VTL8|PR38B_HUMAN	R.RRS#RS#PR.R	R.RRS#RS#PR.R	RRSRSPR	2	7	260	1000	262	1000	0	0	13722.2	Jurkat_TiO2_1mg_3_f09350	Jurkat	TiO2	3	f09350
sp|Q8NAV1|PR38A_HUMAN	R.HRS#KS#PRR.H	R.HRS#KS#PRR.H	HRSKSPRR	2	8	260	1000	262	1000	0	0	957	Jurkat_TiO2_1mg_3_f09350	Jurkat	TiO2	3	f09350
sp|Q99442|SEC62_HUMAN	K.AES#GKEEDKK.S	K.AES#GKEEDKK.S	AESGKEEDKK	1	10	117	1000	0	0	0	0	51.5	Jurkat_TiO2_1mg_3_f09350	Jurkat	TiO2	3	f09350
sp|O43143|DHX15_HUMAN	R.DRDREDRS#K.D	R.DRDREDRS#K.D	DRDREDRSK	1	9	37	1000	0	0	0	0	130.3	Jurkat_TiO2_1mg_3_f09350	Jurkat	TiO2	3	f09350
sp|Q7L4I2|RSRC2_HUMAN	K.SEEHNDKEHS#SDK.G	K.SEEHNDKEHS#SDK.G	SEEHNDKEHSSDK	1	13	94	6.591	0	0	0	0	157.8	Jurkat_TiO2_1mg_3_f09350	Jurkat	TiO2	3	f09350
sp|Q9HCI7|MSL2_HUMAN	K.RSRS#ESDSEK.V	K.RSRS#ESDSEK.V	RSRSESDSEK	1	10	345	11.015	0	0	0	0	70.5	Jurkat_TiO2_1mg_3_f09350	Jurkat	TiO2	3	f09350
sp|Q9H2H9|S38A1_HUMAN	K.IT#DQDGDKGT#QR.I	K.IT#DQDGDKGT#QR.I	ITDQDGDKGTQR	2	12	442	1000	450	1000	0	0	41.4	Jurkat_TiO2_1mg_3_f09350	Jurkat	TiO2	3	f09350
sp|Q15648|MED1_HUMAN	K.HERGS#PSHSK.S	K.HERGS#PSHSK.S	HERGSPSHSK	1	10	1447	17.009	0	0	0	0	64.2	Jurkat_TiO2_1mg_3_f09350	Jurkat	TiO2	3	f09350
sp|O95104|SFR15_HUMAN	R.DRERDS#RDR.E	R.DRERDS#RDR.E	DRERDSRDR	1	9	1063	1000	0	0	0	0	211.1	Jurkat_TiO2_1mg_3_f09350	Jurkat	TiO2	3	f09350
sp|Q92620|PRP16_HUMAN	R.DRDERDRS#R.H	R.DRDERDRS#R.H	DRDERDRSR	1	9	176	1000	0	0	0	0	773.9	Jurkat_TiO2_1mg_3_f09350	Jurkat	TiO2	3	f09350
sp|Q13415|ORC1_HUMAN	K.KAS#PEHR.I	K.KAS#PEHR.I	KASPEHR	1	7	311	1000	0	0	0	0	27.1	Jurkat_TiO2_1mg_3_f09350	Jurkat	TiO2	3	f09350
sp|Q14152|EIF3A_HUMAN		R.RDDRDRDDR.R	RDDRDRDDR	0	9	0	0	0	0	0	0	184.4	Jurkat_TiO2_1mg_3_f09350	Jurkat	TiO2	3	f09350
sp|Q92597|NDRG1_HUMAN	R.SRSHT#SEGTR.S	R.SRSHT#SEGTR.S	SRSHTSEGTR	1	10	346	6.591	0	0	0	0	34.3	Jurkat_TiO2_1mg_3_f09350	Jurkat	TiO2	3	f09350
sp|Q13029|PRDM2_HUMAN	K.KGGHSS#PASSDK.N	K.KGGHSS#PASSDK.N	KGGHSSPASSDK	1	12	1501	0	0	0	0	0	20.8	Jurkat_TiO2_1mg_3_f09350	Jurkat	TiO2	3	f09350
sp|Q92597|NDRG1_HUMAN	R.SRSHT#SEGTR.S	R.SRSHT#SEGTR.S	SRSHTSEGTR	1	10	346	17.009	0	0	0	0	123	Jurkat_TiO2_1mg_3_f09350	Jurkat	TiO2	3	f09350
sp|Q99442|SEC62_HUMAN	K.GKAES#GKEEDK.K	K.GKAES#GKEEDK.K	GKAESGKEEDK	1	11	117	1000	0	0	0	0	42.7	Jurkat_TiO2_1mg_3_f09350	Jurkat	TiO2	3	f09350
sp|P08621|RU17_HUMAN	R.S#RS#RDKEER.R	R.S#RS#RDKEER.R	SRSRDKEER	2	9	266	1000	268	1000	0	0	10454.3	Jurkat_TiO2_1mg_3_f09350	Jurkat	TiO2	3	f09350
sp|P27797|CALR_HUMAN		K.DKQDEEQR.L	DKQDEEQR	0	8	0	0	0	0	0	0	169.7	Jurkat_TiO2_1mg_3_f09350	Jurkat	TiO2	3	f09350
sp|O76021|RL1D1_HUMAN	K.KEQT#PEHGKK.K	K.KEQT#PEHGKK.K	KEQTPEHGKK	1	10	340	1000	0	0	0	0	262.6	Jurkat_TiO2_1mg_3_f09350	Jurkat	TiO2	3	f09350
sp|O76021|RL1D1_HUMAN	K.KEQT#PEHGKK.K	K.KEQT#PEHGKK.K	KEQTPEHGKK	1	10	340	1000	0	0	0	0	68	Jurkat_TiO2_1mg_3_f09350	Jurkat	TiO2	3	f09350
sp|Q9BTA9|WAC_HUMAN	R.RSDS#PENK.Y	R.RSDS#PENK.Y	RSDSPENK	1	8	64	48.874	0	0	0	0	130.8	Jurkat_TiO2_1mg_3_f09350	Jurkat	TiO2	3	f09350
sp|Q86X95|CIR1_HUMAN	K.SRTHKHS#PEK.R	K.SRTHKHS#PEK.R	SRTHKHSPEK	1	10	365	44.278	0	0	0	0	342.4	Jurkat_TiO2_1mg_3_f09350	Jurkat	TiO2	3	f09350
sp|Q2TB10|ZN800_HUMAN	K.HSDSKHDGTSNS#PSK.K	K.HSDSKHDGTSNS#PSK.K	HSDSKHDGTSNSPSK	1	15	595	4.085	0	0	0	0	70.1	Jurkat_TiO2_1mg_3_f09350	Jurkat	TiO2	3	f09350
sp|Q8NAV1|PR38A_HUMAN	R.HRS#HS#KS#PER.S	R.HRS#HS#KS#PER.S	HRSHSKSPER	3	10	292	1000	294	1000	296	1000	2881.8	Jurkat_TiO2_1mg_3_f09350	Jurkat	TiO2	3	f09350
sp|O14641|DVL2_HUMAN	R.DSS#EHGAGGHR.T	R.DSS#EHGAGGHR.T	DSSEHGAGGHR	1	11	170	19.843	0	0	0	0	41.6	Jurkat_TiO2_1mg_3_f09350	Jurkat	TiO2	3	f09350
sp|Q05519|SRS11_HUMAN	R.SRDERERSTS#K.K	R.SRDERERS#TSK.K	SRDERERSTSK	1	11	396	0	0	0	0	0	786	Jurkat_TiO2_1mg_3_f09350	Jurkat	TiO2	3	f09350
sp|Q12872|SFSWA_HUMAN	R.AHS#PERR.R	R.AHS#PERR.R	AHSPERR	1	7	815	1000	0	0	0	0	603.4	Jurkat_TiO2_1mg_3_f09350	Jurkat	TiO2	3	f09350
sp|Q05519|SRS11_HUMAN	R.KSES#DKDVK.Q	R.KSES#DKDVK.Q	KSESDKDVK	1	9	414	17.009	0	0	0	0	333	Jurkat_TiO2_1mg_3_f09350	Jurkat	TiO2	3	f09350
sp|P16403|H12_HUMAN	K.VAKS#PKK.A	K.VAKS#PKK.A	VAKSPKK	1	7	173	1000	0	0	0	0	398.6	Jurkat_TiO2_1mg_3_f09350	Jurkat	TiO2	3	f09350
sp|Q13547|HDAC1_HUMAN	K.RVKT#EDEK.E	K.RVKT#EDEK.E	RVKTEDEK	1	8	445	1000	0	0	0	0	64.4	Jurkat_TiO2_1mg_3_f09350	Jurkat	TiO2	3	f09350
sp|P06748|NPM_HUMAN		K.RSAPGGGSK.V	RSAPGGGSK	0	9	0	0	0	0	0	0	199.9	Jurkat_TiO2_1mg_3_f09350	Jurkat	TiO2	3	f09350
sp|Q6IAA8|LTOR1_HUMAN	-.MGCCYSS#ENEDSDQDREER.K	-.MGCCYSS#ENEDSDQDREER.K	MGCCYSSENEDSDQDREER	1	19	7	0	0	0	0	0	2.8877	Jurkat_TiO2_1mg_3_f09350	Jurkat	TiO2	3	f09350
sp|P16403|H12_HUMAN	K.KVAKS#PK.K	K.KVAKS#PK.K	KVAKSPK	1	7	173	1000	0	0	0	0	509.3	Jurkat_TiO2_1mg_3_f09350	Jurkat	TiO2	3	f09350
sp|P30414|NKTR_HUMAN	K.GHSERS#DTNEK.R	K.GHSERS#DTNEK.R	GHSERSDTNEK	1	11	263	13.38	0	0	0	0	787.5	Jurkat_TiO2_1mg_3_f09350	Jurkat	TiO2	3	f09350
sp|P35269|T2FA_HUMAN	K.KKT#PPKR.E	K.KKT#PPKR.E	KKTPPKR	1	7	368	1000	0	0	0	0	709.2	Jurkat_TiO2_1mg_3_f09350	Jurkat	TiO2	3	f09350
sp|P30414|NKTR_HUMAN	K.GHSERS#DTNEK.R	K.GHSERSDT#NEK.R	GHSERSDTNEK	1	11	263	11.015	0	0	0	0	296	Jurkat_TiO2_1mg_3_f09350	Jurkat	TiO2	3	f09350
sp|Q86XP3|DDX42_HUMAN	R.HSDS#PRHGDGGR.H	R.HSDS#PRHGDGGR.H	HSDSPRHGDGGR	1	12	831	22.011	0	0	0	0	1336.8	Jurkat_TiO2_1mg_3_f09350	Jurkat	TiO2	3	f09350
sp|O14641|DVL2_HUMAN	R.RRDS#SEHGAGGHR.T	R.RRDS#SEHGAGGHR.T	RRDSSEHGAGGHR	1	13	169	6.591	0	0	0	0	110.9	Jurkat_TiO2_1mg_3_f09350	Jurkat	TiO2	3	f09350
sp|Q86XP3|DDX42_HUMAN	R.HSDS#PRHGDGGR.H	R.HSDS#PRHGDGGR.H	HSDSPRHGDGGR	1	12	831	17.009	0	0	0	0	259.5	Jurkat_TiO2_1mg_3_f09350	Jurkat	TiO2	3	f09350
sp|Q86XP3|DDX42_HUMAN	R.HSDS#PRHGDGGR.H	R.HSDS#PRHGDGGR.H	HSDSPRHGDGGR	1	12	831	30.835	0	0	0	0	259.5	Jurkat_TiO2_1mg_3_f09350	Jurkat	TiO2	3	f09350
sp|P51858|HDGF_HUMAN	K.KGNAEGS#S#DEEGK.L	K.KGNAEGS#S#DEEGK.L	KGNAEGSSDEEGK	2	13	132	1000	133	1000	0	0	21.3	Jurkat_TiO2_1mg_3_f09350	Jurkat	TiO2	3	f09350
sp|Q96MU7|YTDC1_HUMAN	R.M*HS#QPR.S	R.M*HS#QPR.S	MHSQPR	1	6	515	1000	0	0	0	0	1386.9	Jurkat_TiO2_1mg_3_f09350	Jurkat	TiO2	3	f09350
sp|O76021|RL1D1_HUMAN	K.KEQT#PEHGK.K	K.KEQT#PEHGK.K	KEQTPEHGK	1	9	340	1000	0	0	0	0	68.6	Jurkat_TiO2_1mg_3_f09350	Jurkat	TiO2	3	f09350
sp|Q9Y4X4|KLF12_HUMAN	R.RSES#PDSRK.R	R.RSES#PDSRK.R	RSESPDSRK	1	9	308	17.009	0	0	0	0	296.9	Jurkat_TiO2_1mg_3_f09350	Jurkat	TiO2	3	f09350
sp|Q8TAQ2|SMRC2_HUMAN	K.GKEGDS#EKESEK.S	K.GKEGDS#EKESEK.S	GKEGDSEKESEK	1	12	806	31.275	0	0	0	0	38.1	Jurkat_TiO2_1mg_3_f09350	Jurkat	TiO2	3	f09350
sp|O15042|SR140_HUMAN	K.SERS#ERSER.S	K.SERS#ERSER.S	SERSERSER	1	9	954	18.603	0	0	0	0	184.9	Jurkat_TiO2_1mg_3_f09350	Jurkat	TiO2	3	f09350
sp|Q9UQ35|SRRM2_HUMAN	K.RDKS#HS#HTPS#RR.M	K.RDKS#HS#HTPS#RR.M	RDKSHSHTPSRR	3	12	472	20.167	474	17.009	478	48.874	4159.9	Jurkat_TiO2_1mg_3_f09350	Jurkat	TiO2	3	f09350
sp|Q6UN15|FIP1_HUMAN	R.RHES#EEGDSHR.R	R.RHES#EEGDSHR.R	RHESEEGDSHR	1	11	554	142.629	0	0	0	0	455.5	Jurkat_TiO2_1mg_3_f09350	Jurkat	TiO2	3	f09350
sp|P16403|H12_HUMAN	K.KAAGGAT#PKK.S	K.KAAGGAT#PKK.S	KAAGGATPKK	1	10	146	1000	0	0	0	0	87.4	Jurkat_TiO2_1mg_3_f09350	Jurkat	TiO2	3	f09350
sp|Q6UN15|FIP1_HUMAN	R.RHES#EEGDSHR.R	R.RHES#EEGDSHR.R	RHESEEGDSHR	1	11	554	17.25	0	0	0	0	110	Jurkat_TiO2_1mg_3_f09350	Jurkat	TiO2	3	f09350
sp|Q9UQ35|SRRM2_HUMAN	K.HRS#PT#PK.S	K.HRS#PT#PK.S	HRSPTPK	2	7	231	1000	233	1000	0	0	12245.8	Jurkat_TiO2_1mg_3_f09350	Jurkat	TiO2	3	f09350
sp|O95232|LC7L3_HUMAN	R.HSSRT#S#DRRCSR.S	R.HSSRTS#DRRCS#R.S	HSSRTSDRRCSR	2	12	303	4.085	304	2.806	0	0	232.2	Jurkat_TiO2_1mg_3_f09350	Jurkat	TiO2	3	f09350
sp|Q6UN15|FIP1_HUMAN	R.RHES#EEGDSHR.R	R.RHES#EEGDSHR.R	RHESEEGDSHR	1	11	554	84.359	0	0	0	0	455.5	Jurkat_TiO2_1mg_3_f09350	Jurkat	TiO2	3	f09350
sp|P13807|GYS1_HUMAN	R.RAS#CTSSTSGSK.R	R.RAS#CTSSTSGSK.R	RASCTSSTSGSK	1	12	698	5.085	0	0	0	0	184	Jurkat_TiO2_1mg_3_f09350	Jurkat	TiO2	3	f09350
sp|P51003|PAPOA_HUMAN	K.KHS#TEGVK.L	K.KHST#EGVK.L	KHSTEGVK	1	8	509	9.34	0	0	0	0	103.9	Jurkat_TiO2_1mg_3_f09350	Jurkat	TiO2	3	f09350
sp|P62633|CNBP_HUMAN		R.DCDHADEQK.C	DCDHADEQK	0	9	0	0	0	0	0	0	117.8	Jurkat_TiO2_1mg_3_f09350	Jurkat	TiO2	3	f09350
sp|Q13769|THOC5_HUMAN	K.RNRS#DTEQEGK.Y	K.RNRS#DTEQEGK.Y	RNRSDTEQEGK	1	11	28	44.278	0	0	0	0	1047.2	Jurkat_TiO2_1mg_3_f09350	Jurkat	TiO2	3	f09350
sp|Q04637|IF4G1_HUMAN	R.RS#QQGPR.K	R.RS#QQGPR.K	RSQQGPR	1	7	704	1000	0	0	0	0	337.4	Jurkat_TiO2_1mg_3_f09350	Jurkat	TiO2	3	f09350
sp|Q9H6Z4|RANB3_HUMAN	K.GQKS#PAEQK.N	K.GQKS#PAEQK.N	GQKSPAEQK	1	9	27	1000	0	0	0	0	7.159	Jurkat_TiO2_1mg_3_f09350	Jurkat	TiO2	3	f09350
sp|Q8N684|CPSF7_HUMAN	R.AHSRDS#SDSADGR.A	R.AHSRDS#SDSADGR.A	AHSRDSSDSADGR	1	13	194	9.34	0	0	0	0	2.628	Jurkat_TiO2_1mg_3_f09350	Jurkat	TiO2	3	f09350
sp|Q96MU7|YTDC1_HUMAN	R.M*HS#QPRS#R.G	R.M*HS#QPRS#R.G	MHSQPRSR	2	8	515	1000	519	1000	0	0	93.9	Jurkat_TiO2_1mg_3_f09350	Jurkat	TiO2	3	f09350
sp|Q53F19|NCBP3_HUMAN	K.RPHS#PEK.A	K.RPHS#PEK.A	RPHSPEK	1	7	500	1000	0	0	0	0	1593	Jurkat_TiO2_1mg_3_f09350	Jurkat	TiO2	3	f09350
sp|Q3L8U1|CHD9_HUMAN	K.KSDGSGT#YTK.L	K.KSDGSGT#YTK.L	KSDGSGTYTK	1	10	496	6.591	0	0	0	0	4.765	Jurkat_TiO2_1mg_3_f09350	Jurkat	TiO2	3	f09350
sp|O43719|HTSF1_HUMAN	R.GSEEDS#PKK.E	R.GSEEDS#PKK.E	GSEEDSPKK	1	9	498	22.011	0	0	0	0	156.7	Jurkat_TiO2_1mg_3_f09350	Jurkat	TiO2	3	f09350
sp|P78347|GTF2I_HUMAN	K.RPRS#PGSNSK.V	K.RPRS#PGSNSK.V	RPRSPGSNSK	1	10	674	15.381	0	0	0	0	10699.4	Jurkat_TiO2_1mg_3_f09350	Jurkat	TiO2	3	f09350
sp|P26038|MOES_HUMAN	K.RAQS#EAEK.L	K.RAQS#EAEK.L	RAQSEAEK	1	8	384	1000	0	0	0	0	1901.9	Jurkat_TiO2_1mg_3_f09350	Jurkat	TiO2	3	f09350
sp|O60669|MOT2_HUMAN	K.TGKTEDDSS#PKK.I	K.TGKTEDDSS#PKK.I	TGKTEDDSSPKK	1	12	219	0	0	0	0	0	435.1	Jurkat_TiO2_1mg_3_f09350	Jurkat	TiO2	3	f09350
sp|Q9H7E2|TDRD3_HUMAN	K.KRDNS#MQSR.S	K.KRDNS#MQSR.S	KRDNSMQSR	1	9	409	23.624	0	0	0	0	104.3	Jurkat_TiO2_1mg_3_f09350	Jurkat	TiO2	3	f09350
sp|Q15651|HMGN3_HUMAN	K.RKS#PENTEGK.D	K.RKS#PENTEGK.D	RKSPENTEGK	1	10	6	27.121	0	0	0	0	601.7	Jurkat_TiO2_1mg_3_f09350	Jurkat	TiO2	3	f09350
sp|Q15651|HMGN3_HUMAN	K.RKS#PENTEGK.D	K.RKS#PENTEGK.D	RKSPENTEGK	1	10	6	11.015	0	0	0	0	336.3	Jurkat_TiO2_1mg_3_f09350	Jurkat	TiO2	3	f09350
sp|Q8IYB3|SRRM1_HUMAN	K.RHS#PS#PR.P	K.RHS#PS#PR.P	RHSPSPR	2	7	683	1000	685	1000	0	0	48.7	Jurkat_TiO2_1mg_3_f09350	Jurkat	TiO2	3	f09350
sp|Q6NZY4|ZCHC8_HUMAN	K.RSSSHSS#PGS#PKK.Q	K.RSSSHSS#PGS#PKK.Q	RSSSHSSPGSPKK	2	13	424	6.591	427	47.045	0	0	544.5	Jurkat_TiO2_1mg_3_f09350	Jurkat	TiO2	3	f09350
sp|Q99442|SEC62_HUMAN	K.SDS#EKKEDEEGK.V	K.SDS#EKKEDEEGK.V	SDSEKKEDEEGK	1	12	315	0	0	0	0	0	85.2	Jurkat_TiO2_1mg_3_f09350	Jurkat	TiO2	3	f09350
sp|Q9UQ35|SRRM2_HUMAN	R.GRS#RS#RT#PR.R	R.GRS#RS#RT#PR.R	GRSRSRTPR	3	9	692	1000	694	1000	696	1000	2938.2	Jurkat_TiO2_1mg_3_f09350	Jurkat	TiO2	3	f09350
sp|Q86X95|CIR1_HUMAN	K.CSGHNNS#DS#EEKDK.S	K.CSGHNNS#DS#EEKDK.S	CSGHNNSDSEEKDK	2	14	305	10.468	307	24.222	0	0	8.0002	Jurkat_TiO2_1mg_3_f09350	Jurkat	TiO2	3	f09350
sp|Q9P1Y6|PHRF1_HUMAN	K.RRSRS#PS#S#EHR.A	K.RRS#RS#PSS#EHR.A	RRSRSPSSEHR	3	11	1165	4.085	1167	6.039	1168	9.394	1526.4	Jurkat_TiO2_1mg_3_f09350	Jurkat	TiO2	3	f09350
sp|Q9H1E3|NUCKS_HUMAN	K.NSQEDS#EDSEDK.D	K.NSQEDS#EDSEDK.D	NSQEDSEDSEDK	1	12	58	37.54	0	0	0	0	112.2	Jurkat_TiO2_1mg_3_f09350	Jurkat	TiO2	3	f09350
sp|P10412|H14_HUMAN	K.KAPKS#PAK.A	K.KAPKS#PAK.A	KAPKSPAK	1	8	187	1000	0	0	0	0	121100	Jurkat_TiO2_1mg_3_f09350	Jurkat	TiO2	3	f09350
sp|P51858|HDGF_HUMAN	K.KGNAEGSS#DEEGK.L	K.KGNAEGSS#DEEGK.L	KGNAEGSSDEEGK	1	13	133	0	0	0	0	0	240.2	Jurkat_TiO2_1mg_3_f09350	Jurkat	TiO2	3	f09350
sp|P30414|NKTR_HUMAN	K.GHS#ERSDT#NEK.R	K.GHS#ERSDT#NEK.R	GHSERSDTNEK	2	11	260	7.971	265	0	0	0	33.1	Jurkat_TiO2_1mg_3_f09350	Jurkat	TiO2	3	f09350
sp|Q9BU76|MMTA2_HUMAN	R.HHHHDS#DSNS#PCCK.R	R.HHHHDS#DSNS#PCCK.R	HHHHDSDSNSPCCK	2	14	231	20.167	235	4.085	0	0	788.6	Jurkat_TiO2_1mg_3_f09350	Jurkat	TiO2	3	f09350
sp|Q9P2E9|RRBP1_HUMAN	K.KAEGS#PSEGK.K	K.KAEGS#PSEGK.K	KAEGSPSEGK	1	10	573	6.591	0	0	0	0	109.5	Jurkat_TiO2_1mg_3_f09350	Jurkat	TiO2	3	f09350
sp|Q9BU76|MMTA2_HUMAN	R.HHHHDS#DS#NSPCCK.R	R.HHHHDSDS#NS#PCCK.R	HHHHDSDSNSPCCK	2	14	231	4.085	233	0	0	0	154.4	Jurkat_TiO2_1mg_3_f09350	Jurkat	TiO2	3	f09350
sp|Q92688|AN32B_HUMAN	K.RKRET#DDEGEDD.-	K.RKRET#DDEGEDD.-	RKRETDDEGEDD	1	12	244	1000	0	0	0	0	939.7	Jurkat_TiO2_1mg_3_f09350	Jurkat	TiO2	3	f09350
sp|Q92688|AN32B_HUMAN	K.RKRET#DDEGEDD.-	K.RKRET#DDEGEDD.-	RKRETDDEGEDD	1	12	244	1000	0	0	0	0	1475.1	Jurkat_TiO2_1mg_3_f09350	Jurkat	TiO2	3	f09350
sp|Q6UN15|FIP1_HUMAN	R.RHES#EEGDSHRR.H	R.RHES#EEGDSHRR.H	RHESEEGDSHRR	1	12	554	22.492	0	0	0	0	2224	Jurkat_TiO2_1mg_3_f09350	Jurkat	TiO2	3	f09350
sp|Q9BUQ8|DDX23_HUMAN		K.DRDSKKDEEDEHGDK.K	DRDSKKDEEDEHGDK	0	15	0	0	0	0	0	0	319.5	Jurkat_TiO2_1mg_3_f09350	Jurkat	TiO2	3	f09350
sp|Q9BUQ8|DDX23_HUMAN		K.DRDSKKDEEDEHGDK.K	DRDSKKDEEDEHGDK	0	15	0	0	0	0	0	0	1362.2	Jurkat_TiO2_1mg_3_f09350	Jurkat	TiO2	3	f09350
sp|P51858|HDGF_HUMAN	K.KGNAEGS#S#DEEGK.L	K.KGNAEGS#S#DEEGK.L	KGNAEGSSDEEGK	2	13	132	1000	133	1000	0	0	85	Jurkat_TiO2_1mg_3_f09350	Jurkat	TiO2	3	f09350
sp|Q9H1E3|NUCKS_HUMAN	K.NSQEDS#EDSEDK.D	K.NSQEDS#EDSEDK.D	NSQEDSEDSEDK	1	12	58	13.38	0	0	0	0	28.3	Jurkat_TiO2_1mg_3_f09350	Jurkat	TiO2	3	f09350
sp|Q9BUQ8|DDX23_HUMAN		K.DRDSKKDEEDEHGDK.K	DRDSKKDEEDEHGDK	0	15	0	0	0	0	0	0	2892.2	Jurkat_TiO2_1mg_3_f09350	Jurkat	TiO2	3	f09350
sp|P10412|H14_HUMAN	K.KAPKS#PAK.A	K.KAPKS#PAK.A	KAPKSPAK	1	8	187	1000	0	0	0	0	121100	Jurkat_TiO2_1mg_3_f09350	Jurkat	TiO2	3	f09350
sp|Q9BUQ8|DDX23_HUMAN		K.DRDSKKDEEDEHGDK.K	DRDSKKDEEDEHGDK	0	15	0	0	0	0	0	0	2.3034	Jurkat_TiO2_1mg_3_f09350	Jurkat	TiO2	3	f09350
sp|Q9Y4X4|KLF12_HUMAN	R.RSES#PDSR.K	R.RSES#PDSR.K	RSESPDSR	1	8	308	17.009	0	0	0	0	234.7	Jurkat_TiO2_1mg_3_f09350	Jurkat	TiO2	3	f09350
sp|Q92688|AN32B_HUMAN	K.RKRET#DDEGEDD.-	K.RKRET#DDEGEDD.-	RKRETDDEGEDD	1	12	244	1000	0	0	0	0	1475.1	Jurkat_TiO2_1mg_3_f09350	Jurkat	TiO2	3	f09350
sp|Q92688|AN32B_HUMAN	K.RKRET#DDEGEDD.-	K.RKRET#DDEGEDD.-	RKRETDDEGEDD	1	12	244	1000	0	0	0	0	939.7	Jurkat_TiO2_1mg_3_f09350	Jurkat	TiO2	3	f09350
sp|Q9Y5B9|SP16H_HUMAN	K.RKAS#VHSSGR.G	K.RKAS#VHSSGR.G	RKASVHSSGR	1	10	1023	27.121	0	0	0	0	550.8	Jurkat_TiO2_1mg_3_f09350	Jurkat	TiO2	3	f09350
sp|Q09161|NCBP1_HUMAN	R.RRHS#DENDGGQPHK.R	R.RRHS#DENDGGQPHK.R	RRHSDENDGGQPHK	1	14	7	1000	0	0	0	0	955.9	Jurkat_TiO2_1mg_3_f09350	Jurkat	TiO2	3	f09350
sp|Q9NYF8|BCLF1_HUMAN	K.SKS#QEEPK.D	K.SKS#QEEPK.D	SKSQEEPK	1	8	183	19.843	0	0	0	0	162.2	Jurkat_TiO2_1mg_3_f09350	Jurkat	TiO2	3	f09350
sp|P51858|HDGF_HUMAN	K.KGNAEGSS#DEEGK.L	K.KGNAEGSS#DEEGK.L	KGNAEGSSDEEGK	1	13	133	0	0	0	0	0	1015.8	Jurkat_TiO2_1mg_3_f09350	Jurkat	TiO2	3	f09350
sp|P46100|ATRX_HUMAN	K.STGKGDS#CDSS#EDKK.S	K.STGKGDS#CDS#SEDKK.S	STGKGDSCDSSEDKK	2	15	1073	7.971	1077	6.591	0	0	76.4	Jurkat_TiO2_1mg_3_f09350	Jurkat	TiO2	3	f09350
sp|P10412|H14_HUMAN	K.KATGAAT#PKK.S	K.KATGAAT#PKK.S	KATGAATPKK	1	10	146	31.275	0	0	0	0	3499.9	Jurkat_TiO2_1mg_3_f09350	Jurkat	TiO2	3	f09350
sp|Q6NZY4|ZCHC8_HUMAN	K.RSSSHSSPGS#PKK.Q	K.RSSSHSSPGS#PKK.Q	RSSSHSSPGSPKK	1	13	427	45.026	0	0	0	0	1400.9	Jurkat_TiO2_1mg_3_f09350	Jurkat	TiO2	3	f09350
sp|O14617|AP3D1_HUMAN	K.HRNTETSKS#PEK.D	K.HRNTETSKS#PEK.D	HRNTETSKSPEK	1	12	829	31.275	0	0	0	0	1764.3	Jurkat_TiO2_1mg_3_f09350	Jurkat	TiO2	3	f09350
sp|Q8IYB3|SRRM1_HUMAN	R.HRRS#RS#PVR.R	R.HRRS#RS#PVR.R	HRRSRSPVR	2	9	341	1000	343	1000	0	0	806.2	Jurkat_TiO2_1mg_3_f09350	Jurkat	TiO2	3	f09350
sp|P10412|H14_HUMAN	K.KAPKS#PAK.A	K.KAPKS#PAK.A	KAPKSPAK	1	8	187	1000	0	0	0	0	121100	Jurkat_TiO2_1mg_3_f09350	Jurkat	TiO2	3	f09350
sp|P58876|H2B1D_HUMAN		K.HAVSEGTK.A	HAVSEGTK	0	8	0	0	0	0	0	0	566.9	Jurkat_TiO2_1mg_3_f09350	Jurkat	TiO2	3	f09350
sp|P83916|CBX1_HUMAN	K.RKADS#DSEDKGEESK.P	K.RKADS#DSEDKGEESK.P	RKADSDSEDKGEESK	1	15	89	31.275	0	0	0	0	6527.8	Jurkat_TiO2_1mg_3_f09350	Jurkat	TiO2	3	f09350
sp|P83916|CBX1_HUMAN	K.RKADSDS#EDKGEESK.P	K.RKADSDS#EDKGEESK.P	RKADSDSEDKGEESK	1	15	91	30.835	0	0	0	0	2956.6	Jurkat_TiO2_1mg_3_f09350	Jurkat	TiO2	3	f09350
sp|Q9ULW0|TPX2_HUMAN	K.HPSS#PAR.V	K.HPSS#PAR.V	HPSSPAR	1	7	293	9.34	0	0	0	0	2240.4	Jurkat_TiO2_1mg_3_f09350	Jurkat	TiO2	3	f09350
sp|Q9Y2W1|TR150_HUMAN	K.NKKS#PEIHRR.I	K.NKKS#PEIHRR.I	NKKSPEIHRR	1	10	672	1000	0	0	0	0	3335.6	Jurkat_TiO2_1mg_3_f09350	Jurkat	TiO2	3	f09350
sp|Q8WXA9|SREK1_HUMAN	K.RKSS#RS#PS#PR.S	K.RKS#SRS#PS#PR.S	RKSSRSPSPR	3	10	404	24.437	406	24.243	408	51.004	1980.6	Jurkat_TiO2_1mg_3_f09350	Jurkat	TiO2	3	f09350
sp|Q8NDT2|RB15B_HUMAN	K.RQSERDS#SPSGR.G	K.RQSERDS#SPSGR.G	RQSERDSSPSGR	1	12	9	0	0	0	0	0	703.4	Jurkat_TiO2_1mg_3_f09350	Jurkat	TiO2	3	f09350
sp|P49321|NASP_HUMAN	K.RKPEEES#PRK.D	K.RKPEEES#PRK.D	RKPEEESPRK	1	10	726	1000	0	0	0	0	47022.9	Jurkat_TiO2_1mg_3_f09350	Jurkat	TiO2	3	f09350
sp|Q9NX58|LYAR_HUMAN	K.RRHS#EVETDSK.K	K.RRHS#EVETDSK.K	RRHSEVETDSK	1	11	276	44.278	0	0	0	0	1384.5	Jurkat_TiO2_1mg_3_f09350	Jurkat	TiO2	3	f09350
sp|Q9NX58|LYAR_HUMAN	K.RRHS#EVETDSK.K	K.RRHS#EVETDSK.K	RRHSEVETDSK	1	11	276	47.045	0	0	0	0	1517.5	Jurkat_TiO2_1mg_3_f09350	Jurkat	TiO2	3	f09350
sp|Q92688|AN32B_HUMAN	R.KRET#DDEGEDD.-	R.KRET#DDEGEDD.-	KRETDDEGEDD	1	11	244	1000	0	0	0	0	7597.2	Jurkat_TiO2_1mg_3_f09350	Jurkat	TiO2	3	f09350
sp|Q9UKV3|ACINU_HUMAN	K.GDS#DDEKPRK.G	K.GDS#DDEKPRK.G	GDSDDEKPRK	1	10	216	1000	0	0	0	0	542.6	Jurkat_TiO2_1mg_3_f09350	Jurkat	TiO2	3	f09350
sp|Q92688|AN32B_HUMAN	R.KRET#DDEGEDD.-	R.KRET#DDEGEDD.-	KRETDDEGEDD	1	11	244	1000	0	0	0	0	7597.2	Jurkat_TiO2_1mg_3_f09350	Jurkat	TiO2	3	f09350
sp|Q9BQ39|DDX50_HUMAN	K.SRHHYDS#DEK.S	K.SRHHYDS#DEK.S	SRHHYDSDEK	1	10	41	30.835	0	0	0	0	1252.1	Jurkat_TiO2_1mg_3_f09350	Jurkat	TiO2	3	f09350
sp|P62899|RL31_HUMAN	K.RNEDEDS#PNK.L	K.RNEDEDS#PNK.L	RNEDEDSPNK	1	10	98	1000	0	0	0	0	2137.2	Jurkat_TiO2_1mg_3_f09350	Jurkat	TiO2	3	f09350
sp|Q9UQ35|SRRM2_HUMAN	R.GRS#HS#RS#PATR.G	R.GRS#HS#RS#PATR.G	GRSHSRSPATR	3	11	562	93.154	564	65.44	566	53.534	1844.7	Jurkat_TiO2_1mg_3_f09350	Jurkat	TiO2	3	f09350
sp|Q7Z6Z7|HUWE1_HUMAN	K.DKEGDRAS#EEGK.Q	K.DKEGDRAS#EEGK.Q	DKEGDRASEEGK	1	12	2052	1000	0	0	0	0	434	Jurkat_TiO2_1mg_3_f09350	Jurkat	TiO2	3	f09350
sp|Q9H1E3|NUCKS_HUMAN	K.TKKDDSHS#AEDS#EDEK.E	K.TKKDDSHS#AEDS#EDEK.E	TKKDDSHSAEDSEDEK	2	16	75	20.167	79	26.105	0	0	343.5	Jurkat_TiO2_1mg_3_f09350	Jurkat	TiO2	3	f09350
sp|O94874|UFL1_HUMAN	K.GRKDDDS#DDESQSSHTGK.K	K.GRKDDDS#DDESQSSHTGK.K	GRKDDDSDDESQSSHTGK	1	18	458	71.067	0	0	0	0	7124.6	Jurkat_TiO2_1mg_3_f09350	Jurkat	TiO2	3	f09350
sp|O94874|UFL1_HUMAN	K.GRKDDDS#DDESQSSHTGK.K	K.GRKDDDS#DDESQSSHTGK.K	GRKDDDSDDESQSSHTGK	1	18	458	58.551	0	0	0	0	5855.1	Jurkat_TiO2_1mg_3_f09350	Jurkat	TiO2	3	f09350
sp|P62995|TRA2B_HUMAN	K.S#ARHT#PARS#R.S	K.S#ARHT#PARS#R.S	SARHTPARSR	3	10	29	1000	33	1000	37	1000	1143.5	Jurkat_TiO2_1mg_3_f09350	Jurkat	TiO2	3	f09350
sp|O94874|UFL1_HUMAN	K.GRKDDDS#DDESQSSHTGK.K	K.GRKDDDSDDES#QSSHTGK.K	GRKDDDSDDESQSSHTGK	1	18	458	59.298	0	0	0	0	1536.9	Jurkat_TiO2_1mg_3_f09350	Jurkat	TiO2	3	f09350
sp|Q13627|DYR1A_HUMAN	R.ARS#DPTHQHR.H	R.ARS#DPTHQHR.H	ARSDPTHQHR	1	10	529	37.54	0	0	0	0	684.3	Jurkat_TiO2_1mg_3_f09350	Jurkat	TiO2	3	f09350
sp|Q9H1E3|NUCKS_HUMAN	K.KDDSHSAEDS#EDEK.E	K.KDDSHSAEDS#EDEK.E	KDDSHSAEDSEDEK	1	14	79	20.167	0	0	0	0	416.5	Jurkat_TiO2_1mg_3_f09350	Jurkat	TiO2	3	f09350
sp|Q9H1E3|NUCKS_HUMAN	K.KDDSHSAEDS#EDEK.E	K.KDDSHSAEDS#EDEK.E	KDDSHSAEDSEDEK	1	14	79	27.121	0	0	0	0	342	Jurkat_TiO2_1mg_3_f09350	Jurkat	TiO2	3	f09350
sp|O95819|M4K4_HUMAN	K.TNHSS#PEAQSK.Q	K.TNHSS#PEAQSK.Q	TNHSSPEAQSK	1	11	580	24.437	0	0	0	0	1141.8	Jurkat_TiO2_1mg_3_f09350	Jurkat	TiO2	3	f09350
sp|Q9BZX2|UCK2_HUMAN	K.RQAS#ESSSRPH.-	K.RQAS#ESSSRPH.-	RQASESSSRPH	1	11	254	20.167	0	0	0	0	3945.6	Jurkat_TiO2_1mg_3_f09350	Jurkat	TiO2	3	f09350
sp|Q9UIG0|BAZ1B_HUMAN	K.NTGS#PDRKPSK.K	K.NTGS#PDRKPSK.K	NTGSPDRKPSK	1	11	312	30.835	0	0	0	0	5166.7	Jurkat_TiO2_1mg_3_f09350	Jurkat	TiO2	3	f09350
sp|O00203|AP3B1_HUMAN	K.GKS#DS#EDGEKENEK.S	K.GKS#DS#EDGEKENEK.S	GKSDSEDGEKENEK	2	14	750	1000	752	1000	0	0	313.8	Jurkat_TiO2_1mg_3_f09350	Jurkat	TiO2	3	f09350
sp|O94874|UFL1_HUMAN	R.KDDDS#DDESQSSHTGK.K	R.KDDDS#DDESQSSHTGK.K	KDDDSDDESQSSHTGK	1	16	458	47.045	0	0	0	0	993.1	Jurkat_TiO2_1mg_3_f09350	Jurkat	TiO2	3	f09350
sp|O94874|UFL1_HUMAN	R.KDDDS#DDESQSSHTGK.K	R.KDDDS#DDESQSSHTGK.K	KDDDSDDESQSSHTGK	1	16	458	31.275	0	0	0	0	683.8	Jurkat_TiO2_1mg_3_f09350	Jurkat	TiO2	3	f09350
sp|Q96IZ7|RSRC1_HUMAN	R.SHS#YDRR.R	R.SHS#YDRR.R	SHSYDRR	1	7	61	24.437	0	0	0	0	1645.3	Jurkat_TiO2_1mg_3_f09350	Jurkat	TiO2	3	f09350
sp|Q9H1E3|NUCKS_HUMAN	K.TKKDDS#HS#AEDS#EDEK.E	K.TKKDDS#HS#AEDS#EDEK.E	TKKDDSHSAEDSEDEK	3	16	73	36.556	75	42.869	79	40.154	515.1	Jurkat_TiO2_1mg_3_f09350	Jurkat	TiO2	3	f09350
sp|Q9H1E3|NUCKS_HUMAN	K.TKKDDS#HS#AEDS#EDEK.E	K.TKKDDS#HS#AEDS#EDEK.E	TKKDDSHSAEDSEDEK	3	16	73	59.298	75	57.711	79	60.358	438	Jurkat_TiO2_1mg_3_f09350	Jurkat	TiO2	3	f09350
sp|P83916|CBX1_HUMAN	K.ADS#DSEDKGEESK.P	K.ADS#DSEDKGEESK.P	ADSDSEDKGEESK	1	13	89	30.835	0	0	0	0	264.4	Jurkat_TiO2_1mg_3_f09350	Jurkat	TiO2	3	f09350
sp|Q9NPF5|DMAP1_HUMAN	K.RRES#ASSS#S#SVKK.A	K.RRES#ASSS#SS#VKK.A	RRESASSSSSVKK	3	13	454	23.624	458	6.591	459	11.015	424.8	Jurkat_TiO2_1mg_3_f09350	Jurkat	TiO2	3	f09350
sp|Q9UQ35|SRRM2_HUMAN	K.GQSQTS#PDHR.S	K.GQSQTS#PDHR.S	GQSQTSPDHR	1	10	1064	9.34	0	0	0	0	589.8	Jurkat_TiO2_1mg_3_f09350	Jurkat	TiO2	3	f09350
sp|Q9BRD0|BUD13_HUMAN	R.RVHNNS#PDTSR.R	R.RVHNNS#PDTSR.R	RVHNNSPDTSR	1	11	248	53.534	0	0	0	0	274.4	Jurkat_TiO2_1mg_3_f09350	Jurkat	TiO2	3	f09350
sp|Q9H1E3|NUCKS_HUMAN	K.TKKDDSHS#AEDS#EDEKEDHK.N	K.TKKDDSHS#AEDS#EDEKEDHK.N	TKKDDSHSAEDSEDEKEDHK	2	20	75	17.009	79	45.026	0	0	704.2	Jurkat_TiO2_1mg_3_f09350	Jurkat	TiO2	3	f09350
sp|Q6P2E9|EDC4_HUMAN	K.TKGS#PRTS#PK.L	K.TKGS#PRTS#PK.L	TKGSPRTSPK	2	10	914	24.243	918	9.34	0	0	3933.8	Jurkat_TiO2_1mg_3_f09350	Jurkat	TiO2	3	f09350
sp|Q08117|AES_HUMAN	K.NGHDGDTHQEDDGEKS#D.-	K.NGHDGDTHQEDDGEKS#D.-	NGHDGDTHQEDDGEKSD	1	17	196	93.178	0	0	0	0	3471.9	Jurkat_TiO2_1mg_3_f09350	Jurkat	TiO2	3	f09350
sp|Q6P2E9|EDC4_HUMAN	K.TKGS#PRTS#PK.L	K.TKGS#PRT#SPK.L	TKGSPRTSPK	2	10	914	7.971	918	0	0	0	1322.7	Jurkat_TiO2_1mg_3_f09350	Jurkat	TiO2	3	f09350
sp|Q9H1E3|NUCKS_HUMAN	K.TKKDDSHS#AEDS#EDEKEDHK.N	K.TKKDDS#HSAEDS#EDEKEDHK.N	TKKDDSHSAEDSEDEKEDHK	2	20	75	4.085	79	42.869	0	0	2564.7	Jurkat_TiO2_1mg_3_f09350	Jurkat	TiO2	3	f09350
sp|Q08117|AES_HUMAN	K.NGHDGDTHQEDDGEKS#D.-	K.NGHDGDTHQEDDGEKS#D.-	NGHDGDTHQEDDGEKSD	1	17	196	91.093	0	0	0	0	1376.4	Jurkat_TiO2_1mg_3_f09350	Jurkat	TiO2	3	f09350
sp|Q53QZ3|RHG15_HUMAN	R.LHHSAS#DTSDK.N	R.LHHSAS#DTSDK.N	LHHSASDTSDK	1	11	243	17.009	0	0	0	0	2434	Jurkat_TiO2_1mg_3_f09350	Jurkat	TiO2	3	f09350
sp|Q53QZ3|RHG15_HUMAN	R.LHHSAS#DTSDK.N	R.LHHSAS#DTSDK.N	LHHSASDTSDK	1	11	243	20.167	0	0	0	0	2714.5	Jurkat_TiO2_1mg_3_f09350	Jurkat	TiO2	3	f09350
sp|Q9H1E3|NUCKS_HUMAN	K.KDDSHS#AEDS#EDEK.E	K.KDDSHS#AEDS#EDEK.E	KDDSHSAEDSEDEK	2	14	75	17.009	79	45.026	0	0	503.5	Jurkat_TiO2_1mg_3_f09350	Jurkat	TiO2	3	f09350
sp|O15318|RPC7_HUMAN	K.RGDGEKS#DEENEEK.E	K.RGDGEKS#DEENEEK.E	RGDGEKSDEENEEK	1	14	157	1000	0	0	0	0	2270.1	Jurkat_TiO2_1mg_3_f09350	Jurkat	TiO2	3	f09350
sp|O15318|RPC7_HUMAN	K.RGDGEKS#DEENEEK.E	K.RGDGEKS#DEENEEK.E	RGDGEKSDEENEEK	1	14	157	1000	0	0	0	0	1623.4	Jurkat_TiO2_1mg_3_f09350	Jurkat	TiO2	3	f09350
sp|Q12872|SFSWA_HUMAN	R.VSRS#PGASRK.R	R.VSRS#PGASRK.R	VSRSPGASRK	1	10	834	22.011	0	0	0	0	590.2	Jurkat_TiO2_1mg_3_f09350	Jurkat	TiO2	3	f09350
sp|O14617|AP3D1_HUMAN	R.NTETSKS#PEK.D	R.NTETSKS#PEK.D	NTETSKSPEK	1	10	829	17.009	0	0	0	0	487.3	Jurkat_TiO2_1mg_3_f09350	Jurkat	TiO2	3	f09350
sp|Q9H1E3|NUCKS_HUMAN	K.TKKDDS#HSAEDS#EDEKEDHK.N	K.TKKDDS#HSAEDS#EDEKEDHK.N	TKKDDSHSAEDSEDEKEDHK	2	20	73	4.085	79	6.039	0	0	1053.3	Jurkat_TiO2_1mg_3_f09350	Jurkat	TiO2	3	f09350
sp|Q9H1E3|NUCKS_HUMAN	K.KDDSHSAEDS#EDEKEDHK.N	K.KDDSHSAEDS#EDEKEDHK.N	KDDSHSAEDSEDEKEDHK	1	18	79	47.045	0	0	0	0	5365.7	Jurkat_TiO2_1mg_3_f09350	Jurkat	TiO2	3	f09350
sp|Q9H1E3|NUCKS_HUMAN	K.KDDSHSAEDS#EDEKEDHK.N	K.KDDSHSAEDS#EDEKEDHK.N	KDDSHSAEDSEDEKEDHK	1	18	79	18.805	0	0	0	0	3001.7	Jurkat_TiO2_1mg_3_f09350	Jurkat	TiO2	3	f09350
sp|Q9H1E3|NUCKS_HUMAN	R.SGKNS#QEDSEDSEDK.D	R.SGKNS#QEDSEDSEDK.D	SGKNSQEDSEDSEDK	1	15	54	37.54	0	0	0	0	633.9	Jurkat_TiO2_1mg_3_f09350	Jurkat	TiO2	3	f09350
sp|Q6P2E9|EDC4_HUMAN	K.GSPRTS#PK.L	K.GSPRTS#PK.L	GSPRTSPK	1	8	918	0	0	0	0	0	1859.8	Jurkat_TiO2_1mg_3_f09350	Jurkat	TiO2	3	f09350
sp|P49321|NASP_HUMAN	R.KPEEES#PRK.D	R.KPEEES#PRK.D	KPEEESPRK	1	9	726	1000	0	0	0	0	412.1	Jurkat_TiO2_1mg_3_f09350	Jurkat	TiO2	3	f09350
sp|Q9H1E3|NUCKS_HUMAN	K.KDDSHSAEDS#EDEKEDHK.N	K.KDDSHSAEDS#EDEKEDHK.N	KDDSHSAEDSEDEKEDHK	1	18	79	59.298	0	0	0	0	981.2	Jurkat_TiO2_1mg_3_f09350	Jurkat	TiO2	3	f09350
sp|Q9H1E3|NUCKS_HUMAN	K.TKKDDS#HS#AEDS#EDEKEDHK.N	K.TKKDDS#HS#AEDS#EDEKEDHK.N	TKKDDSHSAEDSEDEKEDHK	3	20	73	17.25	75	10.468	79	24.465	10935.8	Jurkat_TiO2_1mg_3_f09350	Jurkat	TiO2	3	f09350
sp|P10412|H14_HUMAN	K.KATGAAT#PK.K	K.KATGAAT#PK.K	KATGAATPK	1	9	146	20.167	0	0	0	0	3084.6	Jurkat_TiO2_1mg_3_f09350	Jurkat	TiO2	3	f09350
sp|Q13427|PPIG_HUMAN	R.KS#PPKADEK.E	R.KS#PPKADEK.E	KSPPKADEK	1	9	290	1000	0	0	0	0	5049.2	Jurkat_TiO2_1mg_3_f09350	Jurkat	TiO2	3	f09350
sp|O15042|SR140_HUMAN	K.EKDECT#PTRK.E	K.EKDECT#PTRK.E	EKDECTPTRK	1	10	919	6.591	0	0	0	0	3182.6	Jurkat_TiO2_1mg_3_f09350	Jurkat	TiO2	3	f09350
sp|Q9UGU0|TCF20_HUMAN	R.HRS#EDCGGGPR.S	R.HRS#EDCGGGPR.S	HRSEDCGGGPR	1	11	1792	1000	0	0	0	0	294.7	Jurkat_TiO2_1mg_3_f09350	Jurkat	TiO2	3	f09350
sp|Q8WYH8|ING5_HUMAN	R.RTS#EEDT#PKK.K	R.RTS#EEDT#PKK.K	RTSEEDTPKK	2	10	148	24.437	152	38.189	0	0	154.9	Jurkat_TiO2_1mg_3_f09350	Jurkat	TiO2	3	f09350
sp|Q15003|CND2_HUMAN	R.GHPHSASS#PSER.V	R.GHPHSASS#PSER.V	GHPHSASSPSER	1	12	28	20.167	0	0	0	0	2982.1	Jurkat_TiO2_1mg_3_f09350	Jurkat	TiO2	3	f09350
sp|Q15003|CND2_HUMAN	R.GHPHSASS#PSER.V	R.GHPHSASS#PSER.V	GHPHSASSPSER	1	12	28	0	0	0	0	0	1375.9	Jurkat_TiO2_1mg_3_f09350	Jurkat	TiO2	3	f09350
sp|O14578|CTRO_HUMAN	R.GPSTSRSS#PNK.R	R.GPSTSRSS#PNK.R	GPSTSRSSPNK	1	11	1920	9.34	0	0	0	0	462	Jurkat_TiO2_1mg_3_f09350	Jurkat	TiO2	3	f09350
sp|O75376|NCOR1_HUMAN	R.GSRPGKS#PER.S	R.GSRPGKS#PER.S	GSRPGKSPER	1	10	2136	41.302	0	0	0	0	888.6	Jurkat_TiO2_1mg_3_f09350	Jurkat	TiO2	3	f09350
sp|Q9H1E3|NUCKS_HUMAN	K.NSQEDS#EDSEDK.D	K.NSQEDS#EDSEDK.D	NSQEDSEDSEDK	1	12	58	37.54	0	0	0	0	493.1	Jurkat_TiO2_1mg_3_f09350	Jurkat	TiO2	3	f09350
sp|P21359|NF1_HUMAN	R.HGS#ASQVQK.Q	R.HGS#ASQVQK.Q	HGSASQVQK	1	9	2817	30.835	0	0	0	0	378.8	Jurkat_TiO2_1mg_3_f09350	Jurkat	TiO2	3	f09350
sp|Q9NSI8|SAMN1_HUMAN	K.RKPS#NVSEK.E	K.RKPS#NVSEK.E	RKPSNVSEK	1	9	7	24.243	0	0	0	0	497.2	Jurkat_TiO2_1mg_3_f09350	Jurkat	TiO2	3	f09350
sp|Q9Y388|RBMX2_HUMAN	R.ERESS#NPSDR.W	R.ERESS#NPSDR.W	ERESSNPSDR	1	10	314	0	0	0	0	0	262.5	Jurkat_TiO2_1mg_3_f09350	Jurkat	TiO2	3	f09350
sp|P21580|TNAP3_HUMAN	R.SPS#PHSCHR.A	R.SPS#PHSCHR.A	SPSPHSCHR	1	9	575	13.38	0	0	0	0	199.1	Jurkat_TiO2_1mg_3_f09350	Jurkat	TiO2	3	f09350
sp|Q9H1E3|NUCKS_HUMAN	K.KDDSHS#AEDS#EDEKEDHK.N	K.KDDSHS#AEDS#EDEKEDHK.N	KDDSHSAEDSEDEKEDHK	2	18	75	11.015	79	18.978	0	0	15781.1	Jurkat_TiO2_1mg_3_f09350	Jurkat	TiO2	3	f09350
sp|Q96MU7|YTDC1_HUMAN	R.MHS#QPR.S	R.MHS#QPR.S	MHSQPR	1	6	515	1000	0	0	0	0	2433.1	Jurkat_TiO2_1mg_3_f09350	Jurkat	TiO2	3	f09350
sp|P78559|MAP1A_HUMAN	K.AKPAS#PARR.L	K.AKPAS#PARR.L	AKPASPARR	1	9	2617	1000	0	0	0	0	1816.4	Jurkat_TiO2_1mg_3_f09350	Jurkat	TiO2	3	f09350
sp|O15042|SR140_HUMAN	K.RRHST#S#PS#PSR.S	K.RRHST#S#PS#PSR.S	RRHSTSPSPSR	3	11	931	9.34	932	6.591	934	11.015	5479.8	Jurkat_TiO2_1mg_3_f09350	Jurkat	TiO2	3	f09350
sp|P21580|TNAP3_HUMAN	R.SPS#PHSCHR.A	R.SPS#PHSCHR.A	SPSPHSCHR	1	9	575	27.055	0	0	0	0	544	Jurkat_TiO2_1mg_3_f09350	Jurkat	TiO2	3	f09350
sp|P06748|NPM_HUMAN	K.DSKPSS#T#PRSK.G	K.DSKPSS#T#PRSK.G	DSKPSSTPRSK	2	11	218	0	219	0	0	0	855.4	Jurkat_TiO2_1mg_3_f09350	Jurkat	TiO2	3	f09350
sp|P55010|IF5_HUMAN	K.NPPENSDS#GTGKK.E	K.NPPENSDS#GTGKK.E	NPPENSDSGTGKK	1	13	151	0	0	0	0	0	303.9	Jurkat_TiO2_1mg_3_f09350	Jurkat	TiO2	3	f09350
sp|Q9H1E3|NUCKS_HUMAN	K.TKKDDS#HS#AEDSEDEKEDHK.N	K.TKKDDS#HS#AEDSEDEKEDHK.N	TKKDDSHSAEDSEDEKEDHK	2	20	73	2.576	75	1.383	0	0	21.6	Jurkat_TiO2_1mg_3_f09350	Jurkat	TiO2	3	f09350
sp|Q9UQ35|SRRM2_HUMAN	R.M*GRS#RS#PATAK.R	R.M*GRS#RS#PATAK.R	MGRSRSPATAK	2	11	484	38.189	486	37.54	0	0	10494.8	Jurkat_TiO2_1mg_3_f09350	Jurkat	TiO2	3	f09350
sp|P55010|IF5_HUMAN	K.NPPENSDS#GTGKK.E	K.NPPENSDS#GTGKK.E	NPPENSDSGTGKK	1	13	151	4.085	0	0	0	0	262.9	Jurkat_TiO2_1mg_3_f09350	Jurkat	TiO2	3	f09350
sp|Q9BRD0|BUD13_HUMAN	R.VHNNS#PDTSRR.T	R.VHNNS#PDTSRR.T	VHNNSPDTSRR	1	11	248	45.026	0	0	0	0	1036.7	Jurkat_TiO2_1mg_3_f09350	Jurkat	TiO2	3	f09350
sp|Q15287|RNPS1_HUMAN	K.RRS#PS#PKPTK.V	K.RRS#PSPKPT#K.V	RRSPSPKPTK	2	10	155	33.657	157	20.167	0	0	99902.5	Jurkat_TiO2_1mg_3_f09350	Jurkat	TiO2	3	f09350
sp|P13984|T2FB_HUMAN	R.HYQGEEKS#D.-	R.HYQGEEKS#D.-	HYQGEEKSD	1	9	248	104.477	0	0	0	0	7692.6	Jurkat_TiO2_1mg_3_f09350	Jurkat	TiO2	3	f09350
sp|Q08170|SRSF4_HUMAN	K.RGS#VS#RGRS#QEK.S	K.RGS#VS#RGRS#QEK.S	RGSVSRGRSQEK	3	12	316	1000	318	1000	322	1000	5490.1	Jurkat_TiO2_1mg_3_f09350	Jurkat	TiO2	3	f09350
sp|P18583|SON_HUMAN	K.KRDSS#LRS#R.S	K.KRDS#SLRS#R.S	KRDSSLRSR	2	9	1821	24.437	1824	59.298	0	0	1221.5	Jurkat_TiO2_1mg_3_f09350	Jurkat	TiO2	3	f09350
sp|Q9Y232|CDYL1_HUMAN	R.TNRTS#PNNAR.K	R.TNRTS#PNNAR.K	TNRTSPNNAR	1	10	129	24.437	0	0	0	0	404.9	Jurkat_TiO2_1mg_3_f09350	Jurkat	TiO2	3	f09350
sp|Q7L4I2|RSRC2_HUMAN	R.LNS#SENGEDRHK.R	R.LNS#SENGEDRHK.R	LNSSENGEDRHK	1	12	104	24.437	0	0	0	0	832.7	Jurkat_TiO2_1mg_3_f09350	Jurkat	TiO2	3	f09350
sp|P33991|MCM4_HUMAN	R.SEDARS#S#PSQRR.R	R.SEDARS#S#PSQRR.R	SEDARSSPSQRR	2	12	31	33.657	32	31.275	0	0	448.2	Jurkat_TiO2_1mg_3_f09350	Jurkat	TiO2	3	f09350
sp|Q9H1E3|NUCKS_HUMAN	K.KDDSHS#AEDS#EDEKEDHK.N	K.KDDSHS#AEDS#EDEKEDHK.N	KDDSHSAEDSEDEKEDHK	2	18	75	6.591	79	23.624	0	0	4280	Jurkat_TiO2_1mg_3_f09350	Jurkat	TiO2	3	f09350
sp|Q9H1E3|NUCKS_HUMAN	K.KDDSHS#AEDS#EDEKEDHK.N	K.KDDSHS#AEDS#EDEKEDHK.N	KDDSHSAEDSEDEKEDHK	2	18	75	20.167	79	42.869	0	0	10679.7	Jurkat_TiO2_1mg_3_f09350	Jurkat	TiO2	3	f09350
sp|Q6PH81|CP087_HUMAN	R.SNS#HSDHIRR.G	R.SNS#HSDHIRR.G	SNSHSDHIRR	1	10	91	14.966	0	0	0	0	1290.2	Jurkat_TiO2_1mg_3_f09350	Jurkat	TiO2	3	f09350
sp|Q9NSU2|TREX1_HUMAN	R.ASS#PSEHGPRK.S	R.AS#SPSEHGPRK.S	ASSPSEHGPRK	1	11	222	0	0	0	0	0	1143.6	Jurkat_TiO2_1mg_3_f09350	Jurkat	TiO2	3	f09350
sp|Q8NEM0|MCPH1_HUMAN	K.RVSHGSHS#PPK.E	K.RVSHGSHS#PPK.E	RVSHGSHSPPK	1	11	365	20.167	0	0	0	0	585.3	Jurkat_TiO2_1mg_3_f09350	Jurkat	TiO2	3	f09350
sp|Q9Y232|CDYL1_HUMAN	R.TNRTS#PNNAR.K	R.TNRTS#PNNAR.K	TNRTSPNNAR	1	10	129	6.591	0	0	0	0	259.9	Jurkat_TiO2_1mg_3_f09350	Jurkat	TiO2	3	f09350
sp|Q9UQ35|SRRM2_HUMAN	K.SKT#PSRQSHSSSS#PHPK.V	K.SKT#PSRQSHSSSS#PHPK.V	SKTPSRQSHSSSSPHPK	2	17	829	5.75	839	0	0	0	231.4	Jurkat_TiO2_1mg_3_f09350	Jurkat	TiO2	3	f09350
sp|Q13111|CAF1A_HUMAN	R.RGDSQECS#PR.S	R.RGDSQECS#PR.S	RGDSQECSPR	1	10	203	44.278	0	0	0	0	1261.1	Jurkat_TiO2_1mg_3_f09350	Jurkat	TiO2	3	f09350
sp|Q8N5P1|ZC3H8_HUMAN	R.NSGS#QEEDGKPK.E	R.NSGS#QEEDGKPK.E	NSGSQEEDGKPK	1	12	165	17.009	0	0	0	0	148.6	Jurkat_TiO2_1mg_3_f09350	Jurkat	TiO2	3	f09350
sp|Q15036|SNX17_HUMAN	R.RSDS#QQAVK.S	R.RSDS#QQAVK.S	RSDSQQAVK	1	9	409	30.835	0	0	0	0	3204.6	Jurkat_TiO2_1mg_3_f09350	Jurkat	TiO2	3	f09350
sp|Q9BU76|MMTA2_HUMAN	R.AEDQTES#SCESHRK.S	R.AEDQTES#SCESHRK.S	AEDQTESSCESHRK	1	14	177	20.167	0	0	0	0	1119	Jurkat_TiO2_1mg_3_f09350	Jurkat	TiO2	3	f09350
sp|P78347|GTF2I_HUMAN	K.ESTSSKS#PPRK.I	K.ESTSSKS#PPRK.I	ESTSSKSPPRK	1	11	823	17.009	0	0	0	0	3206.1	Jurkat_TiO2_1mg_3_f09350	Jurkat	TiO2	3	f09350
sp|P11142|HSP7C_HUMAN	K.KDIS#ENK.R	K.KDIS#ENK.R	KDISENK	1	7	254	1000	0	0	0	0	326.2	Jurkat_TiO2_1mg_3_f09350	Jurkat	TiO2	3	f09350
sp|Q9H1E3|NUCKS_HUMAN	K.TKKDDS#HS#AEDS#EDEKEDHK.N	K.TKKDDS#HS#AEDS#EDEKEDHK.N	TKKDDSHSAEDSEDEKEDHK	3	20	73	38.189	75	24.632	79	46.819	11116.3	Jurkat_TiO2_1mg_3_f09350	Jurkat	TiO2	3	f09350
sp|Q15555|MARE2_HUMAN	K.SHHANSPT#AGAAK.S	K.SHHANSPT#AGAAK.S	SHHANSPTAGAAK	1	13	202	6.591	0	0	0	0	1582	Jurkat_TiO2_1mg_3_f09350	Jurkat	TiO2	3	f09350
sp|P33991|MCM4_HUMAN	R.SEDARSS#PSQR.R	R.SEDARSS#PSQR.R	SEDARSSPSQR	1	11	32	0	0	0	0	0	5570.6	Jurkat_TiO2_1mg_3_f09350	Jurkat	TiO2	3	f09350
sp|O15042|SR140_HUMAN	R.SSHKDS#PRDVSK.K	R.SSHKDS#PRDVSK.K	SSHKDSPRDVSK	1	12	974	65.44	0	0	0	0	1017	Jurkat_TiO2_1mg_3_f09350	Jurkat	TiO2	3	f09350
sp|Q9UQ35|SRRM2_HUMAN	R.S#RAS#PATHR.R	R.S#RAS#PATHR.R	SRASPATHR	2	9	1866	57.711	1869	13.38	0	0	542.8	Jurkat_TiO2_1mg_3_f09350	Jurkat	TiO2	3	f09350
sp|Q15555|MARE2_HUMAN	K.SHHANS#PTAGAAK.S	K.SHHANS#PTAGAAK.S	SHHANSPTAGAAK	1	13	200	44.278	0	0	0	0	3451.6	Jurkat_TiO2_1mg_3_f09350	Jurkat	TiO2	3	f09350
sp|P83916|CBX1_HUMAN	R.KADS#DSEDKGEESKPK.K	R.KADS#DSEDKGEESKPK.K	KADSDSEDKGEESKPK	1	16	89	11.015	0	0	0	0	369.8	Jurkat_TiO2_1mg_3_f09350	Jurkat	TiO2	3	f09350
sp|Q8IYB3|SRRM1_HUMAN	K.TRHS#PT#PQQSNR.T	K.TRHS#PT#PQQSNR.T	TRHSPTPQQSNR	2	12	414	71.753	416	59.298	0	0	9104.1	Jurkat_TiO2_1mg_3_f09350	Jurkat	TiO2	3	f09350
sp|P83916|CBX1_HUMAN	R.KADS#DSEDKGEESKPK.K	R.KADS#DSEDKGEESKPK.K	KADSDSEDKGEESKPK	1	16	89	11.015	0	0	0	0	478.8	Jurkat_TiO2_1mg_3_f09350	Jurkat	TiO2	3	f09350
sp|O00567|NOP56_HUMAN	K.KFHKAS#QED.-	K.KFHKAS#QED.-	KFHKASQED	1	9	591	1000	0	0	0	0	216.4	Jurkat_TiO2_1mg_3_f09350	Jurkat	TiO2	3	f09350
sp|Q9UIG0|BAZ1B_HUMAN	K.KSDGACDS#PSSDK.E	K.KSDGACDS#PSSDK.E	KSDGACDSPSSDK	1	13	158	30.835	0	0	0	0	601.7	Jurkat_TiO2_1mg_3_f09350	Jurkat	TiO2	3	f09350
sp|Q9UK58|CCNL1_HUMAN	R.HHNHGS#PHLK.A	R.HHNHGS#PHLK.A	HHNHGSPHLK	1	10	445	1000	0	0	0	0	302	Jurkat_TiO2_1mg_3_f09350	Jurkat	TiO2	3	f09350
sp|Q14C86|GAPD1_HUMAN	K.DSSRGETEERKDS#DDEK.S	K.DSSRGETEERKDS#DDEK.S	DSSRGETEERKDSDDEK	1	17	966	26.105	0	0	0	0	5607	Jurkat_TiO2_1mg_3_f09350	Jurkat	TiO2	3	f09350
sp|Q14C86|GAPD1_HUMAN	K.DSSRGETEERKDS#DDEK.S	K.DSSRGETEERKDS#DDEK.S	DSSRGETEERKDSDDEK	1	17	966	57.711	0	0	0	0	1825.4	Jurkat_TiO2_1mg_3_f09350	Jurkat	TiO2	3	f09350
sp|Q5SW79|CE170_HUMAN	K.GNKHDDGT#QSDSENAGAHRR.C	K.GNKHDDGT#QSDSENAGAHRR.C	GNKHDDGTQSDSENAGAHRR	1	20	377	4.085	0	0	0	0	94.1	Jurkat_TiO2_1mg_3_f09350	Jurkat	TiO2	3	f09350
sp|O95232|LC7L3_HUMAN	R.KRT#EEPDRDER.L	R.KRT#EEPDRDER.L	KRTEEPDRDER	1	11	238	1000	0	0	0	0	1260.6	Jurkat_TiO2_1mg_3_f09350	Jurkat	TiO2	3	f09350
sp|O95232|LC7L3_HUMAN	R.KRT#EEPDRDER.L	R.KRT#EEPDRDER.L	KRTEEPDRDER	1	11	238	1000	0	0	0	0	3194.3	Jurkat_TiO2_1mg_3_f09350	Jurkat	TiO2	3	f09350
sp|Q9UQ35|SRRM2_HUMAN	R.RGRS#PS#PKPR.G	R.RGRS#PS#PKPR.G	RGRSPSPKPR	2	10	1762	1000	1764	1000	0	0	100700	Jurkat_TiO2_1mg_3_f09350	Jurkat	TiO2	3	f09350
sp|P33991|MCM4_HUMAN	R.SEDARS#S#PSQR.R	R.SEDARS#S#PSQR.R	SEDARSSPSQR	2	11	31	10.095	32	16.062	0	0	492.2	Jurkat_TiO2_1mg_3_f09350	Jurkat	TiO2	3	f09350
sp|Q6ZU80|CE128_HUMAN	R.RNS#LQHHQDDTK.Y	R.RNS#LQHHQDDTK.Y	RNSLQHHQDDTK	1	12	1008	58.551	0	0	0	0	50.4	Jurkat_TiO2_1mg_3_f09350	Jurkat	TiO2	3	f09350
sp|Q6ZU80|CE128_HUMAN	R.RNS#LQHHQDDTK.Y	R.RNS#LQHHQDDTK.Y	RNSLQHHQDDTK	1	12	1008	80.165	0	0	0	0	452.8	Jurkat_TiO2_1mg_3_f09350	Jurkat	TiO2	3	f09350
sp|Q9UQ35|SRRM2_HUMAN	R.RGRS#PS#PKPR.G	R.RGRS#PS#PKPR.G	RGRSPSPKPR	2	10	1762	1000	1764	1000	0	0	17713.1	Jurkat_TiO2_1mg_3_f09350	Jurkat	TiO2	3	f09350
sp|O94874|UFL1_HUMAN	K.DDDS#DDESQSSHTGK.K	K.DDDS#DDESQSSHTGK.K	DDDSDDESQSSHTGK	1	15	458	4.085	0	0	0	0	452.3	Jurkat_TiO2_1mg_3_f09350	Jurkat	TiO2	3	f09350
sp|Q99442|SEC62_HUMAN	K.SDSEEKS#DSEKKEDEEGK.V	K.SDSEEKS#DSEKKEDEEGK.V	SDSEEKSDSEKKEDEEGK	1	18	313	6.591	0	0	0	0	487.9	Jurkat_TiO2_1mg_3_f09350	Jurkat	TiO2	3	f09350
sp|O15042|SR140_HUMAN	R.SRS#SHKDS#PRDVSK.K	R.SRS#SHKDS#PRDVSK.K	SRSSHKDSPRDVSK	2	14	969	6.591	974	23.523	0	0	1234.9	Jurkat_TiO2_1mg_3_f09350	Jurkat	TiO2	3	f09350
sp|Q99442|SEC62_HUMAN	K.SDSEEKS#DSEKKEDEEGK.V	K.SDSEEKS#DSEKKEDEEGK.V	SDSEEKSDSEKKEDEEGK	1	18	313	4.54	0	0	0	0	487.9	Jurkat_TiO2_1mg_3_f09350	Jurkat	TiO2	3	f09350
sp|Q14978|NOLC1_HUMAN	K.NS#EEEEEEKK.K	K.NS#EEEEEEKK.K	NSEEEEEEKK	1	10	563	1000	0	0	0	0	136.8	Jurkat_TiO2_1mg_3_f09350	Jurkat	TiO2	3	f09350
sp|O94874|UFL1_HUMAN	K.DDDS#DDESQSSHTGK.K	K.DDDS#DDESQSSHTGK.K	DDDSDDESQSSHTGK	1	15	458	27.121	0	0	0	0	210.5	Jurkat_TiO2_1mg_3_f09350	Jurkat	TiO2	3	f09350
sp|P49321|NASP_HUMAN	R.KPEEES#PRKDDAK.K	R.KPEEES#PRKDDAK.K	KPEEESPRKDDAK	1	13	726	1000	0	0	0	0	479.2	Jurkat_TiO2_1mg_3_f09350	Jurkat	TiO2	3	f09350
sp|P33991|MCM4_HUMAN	R.SEDARS#S#PSQR.R	R.SEDARS#S#PSQR.R	SEDARSSPSQR	2	11	31	7.971	32	11.015	0	0	39.4	Jurkat_TiO2_1mg_3_f09350	Jurkat	TiO2	3	f09350
sp|Q6ZRS2|SRCAP_HUMAN	K.NRS#PADAGR.G	K.NRS#PADAGR.G	NRSPADAGR	1	9	2869	1000	0	0	0	0	891	Jurkat_TiO2_1mg_3_f09350	Jurkat	TiO2	3	f09350
sp|Q8IYB3|SRRM1_HUMAN	K.QRSS#PVTK.R	K.QRS#SPVTK.R	QRSSPVTK	1	8	646	24.437	0	0	0	0	21427	Jurkat_TiO2_1mg_3_f09350	Jurkat	TiO2	3	f09350
sp|Q9H1E3|NUCKS_HUMAN	K.KDDS#HS#AEDS#EDEKEDHK.N	K.KDDS#HS#AEDS#EDEKEDHK.N	KDDSHSAEDSEDEKEDHK	3	18	73	1000	75	1000	79	1000	5779.6	Jurkat_TiO2_1mg_3_f09350	Jurkat	TiO2	3	f09350
sp|Q9H1E3|NUCKS_HUMAN	K.DDSHSAEDS#EDEK.E	K.DDSHSAEDS#EDEK.E	DDSHSAEDSEDEK	1	13	79	76.733	0	0	0	0	906.6	Jurkat_TiO2_1mg_3_f09350	Jurkat	TiO2	3	f09350
sp|Q9H1E3|NUCKS_HUMAN	K.KDDS#HS#AEDS#EDEKEDHK.N	K.KDDS#HS#AEDS#EDEKEDHK.N	KDDSHSAEDSEDEKEDHK	3	18	73	1000	75	1000	79	1000	1037.2	Jurkat_TiO2_1mg_3_f09350	Jurkat	TiO2	3	f09350
sp|Q9H1E3|NUCKS_HUMAN	K.DDSHSAEDS#EDEK.E	K.DDSHSAEDS#EDEK.E	DDSHSAEDSEDEK	1	13	79	47.045	0	0	0	0	586.6	Jurkat_TiO2_1mg_3_f09350	Jurkat	TiO2	3	f09350
sp|P05455|LA_HUMAN	K.RAREET#DKEEPASK.Q	K.RAREET#DKEEPASK.Q	RAREETDKEEPASK	1	14	389	69.198	0	0	0	0	330.1	Jurkat_TiO2_1mg_3_f09350	Jurkat	TiO2	3	f09350
sp|Q9H1E3|NUCKS_HUMAN	K.KDDS#HS#AEDS#EDEKEDHK.N	K.KDDS#HS#AEDS#EDEKEDHK.N	KDDSHSAEDSEDEKEDHK	3	18	73	1000	75	1000	79	1000	2494.3	Jurkat_TiO2_1mg_3_f09350	Jurkat	TiO2	3	f09350
sp|Q86U70|LDB1_HUMAN	K.RKMS#GGSTM*SSGGGNTNNSNSK.K	K.RKMS#GGSTM*SSGGGNTNNSNSK.K	RKMSGGSTMSSGGGNTNNSNSK	1	22	302	11.721	0	0	0	0	566.6	Jurkat_TiO2_1mg_3_f09350	Jurkat	TiO2	3	f09350
sp|Q9Y383|LC7L2_HUMAN	K.KRS#YESANGR.S	K.KRS#YESANGR.S	KRSYESANGR	1	10	370	17.009	0	0	0	0	51.6	Jurkat_TiO2_1mg_3_f09350	Jurkat	TiO2	3	f09350
sp|P29374|ARI4A_HUMAN	K.KQEDS#DKDS#DEEEEK.S	K.KQEDS#DKDS#DEEEEK.S	KQEDSDKDSDEEEEK	2	15	538	1000	542	1000	0	0	431.1	Jurkat_TiO2_1mg_3_f09350	Jurkat	TiO2	3	f09350
sp|Q6PH81|CP087_HUMAN	R.SNS#HSDHIR.R	R.SNS#HSDHIR.R	SNSHSDHIR	1	9	91	17.009	0	0	0	0	516.2	Jurkat_TiO2_1mg_3_f09350	Jurkat	TiO2	3	f09350
sp|Q9H1E3|NUCKS_HUMAN	K.DDSHS#AEDS#EDEK.E	K.DDSHS#AEDS#EDEK.E	DDSHSAEDSEDEK	2	13	75	17.009	79	45.026	0	0	308.6	Jurkat_TiO2_1mg_3_f09350	Jurkat	TiO2	3	f09350
sp|P29374|ARI4A_HUMAN	K.KQEDS#DKDS#DEEEEK.S	K.KQEDS#DKDS#DEEEEK.S	KQEDSDKDSDEEEEK	2	15	538	1000	542	1000	0	0	1265.3	Jurkat_TiO2_1mg_3_f09350	Jurkat	TiO2	3	f09350
sp|Q14690|RRP5_HUMAN	R.YSHVSQHS#PSKK.A	R.YSHVSQHS#PSKK.A	YSHVSQHSPSKK	1	12	1360	13.38	0	0	0	0	72.4	Jurkat_TiO2_1mg_3_f09350	Jurkat	TiO2	3	f09350
sp|Q6PH81|CP087_HUMAN	R.SNS#HSDHIR.R	R.SNS#HSDHIR.R	SNSHSDHIR	1	9	91	20.167	0	0	0	0	1448.9	Jurkat_TiO2_1mg_3_f09350	Jurkat	TiO2	3	f09350
sp|Q8IYB3|SRRM1_HUMAN	K.RHS#PS#PRPR.A	K.RHS#PS#PRPR.A	RHSPSPRPR	2	9	683	1000	685	1000	0	0	104500	Jurkat_TiO2_1mg_3_f09350	Jurkat	TiO2	3	f09350
sp|P46100|ATRX_HUMAN	K.TSQEGS#S#DDAERK.Q	K.TSQEGS#S#DDAERK.Q	TSQEGSSDDAERK	2	13	875	34.073	876	38.189	0	0	43.5	Jurkat_TiO2_1mg_3_f09350	Jurkat	TiO2	3	f09350
sp|Q9H1E3|NUCKS_HUMAN	K.DDSHS#AEDS#EDEKEDHK.N	K.DDS#HS#AEDSEDEKEDHK.N	DDSHSAEDSEDEKEDHK	2	17	75	4.54	79	13.378	0	0	649.8	Jurkat_TiO2_1mg_3_f09350	Jurkat	TiO2	3	f09350
sp|Q9UQ35|SRRM2_HUMAN	K.SKT#PSRQSHSS#SS#PHPK.V	K.SKT#PSRQSHSS#SS#PHPK.V	SKTPSRQSHSSSSPHPK	3	17	829	5.75	837	7.971	839	0	938.7	Jurkat_TiO2_1mg_3_f09350	Jurkat	TiO2	3	f09350
sp|Q9H1E3|NUCKS_HUMAN	K.DDSHSAEDS#EDEKEDHK.N	K.DDSHSAEDS#EDEKEDHK.N	DDSHSAEDSEDEKEDHK	1	17	79	27.121	0	0	0	0	16511	Jurkat_TiO2_1mg_3_f09350	Jurkat	TiO2	3	f09350
sp|Q9NYZ3|GTSE1_HUMAN	R.RRDS#CLNSK.T	R.RRDS#CLNSK.T	RRDSCLNSK	1	9	435	31.275	0	0	0	0	40.8	Jurkat_TiO2_1mg_3_f09350	Jurkat	TiO2	3	f09350
sp|Q5VT06|CE350_HUMAN	K.RRGHHDDS#DEEASPEK.T	K.RRGHHDDS#DEEASPEK.T	RRGHHDDSDEEASPEK	1	16	1648	9.394	0	0	0	0	127.2	Jurkat_TiO2_1mg_3_f09350	Jurkat	TiO2	3	f09350
sp|Q5VT06|CE350_HUMAN	K.RRGHHDDS#DEEASPEK.T	K.RRGHHDDS#DEEASPEK.T	RRGHHDDSDEEASPEK	1	16	1648	71.949	0	0	0	0	167.5	Jurkat_TiO2_1mg_3_f09350	Jurkat	TiO2	3	f09350
sp|Q5SW79|CE170_HUMAN	K.HDDGT#QSDSENAGAHRR.C	K.HDDGT#QSDSENAGAHRR.C	HDDGTQSDSENAGAHRR	1	17	377	31.275	0	0	0	0	1384.5	Jurkat_TiO2_1mg_3_f09350	Jurkat	TiO2	3	f09350
sp|O75475|PSIP1_HUMAN	K.KRETS#MDSR.L	K.KRETS#MDSR.L	KRETSMDSR	1	9	347	17.009	0	0	0	0	1577.7	Jurkat_TiO2_1mg_3_f09350	Jurkat	TiO2	3	f09350
sp|Q6PH81|CP087_HUMAN	K.HSEKS#PPSTENKHEAK.R	K.HSEKS#PPSTENKHEAK.R	HSEKSPPSTENKHEAK	1	16	50	27.121	0	0	0	0	641.6	Jurkat_TiO2_1mg_3_f09350	Jurkat	TiO2	3	f09350
sp|Q5H9F3|BCORL_HUMAN	K.HRKPTKPESQS#PGK.R	K.HRKPTKPES#QSPGK.R	HRKPTKPESQSPGK	1	14	1192	4.085	0	0	0	0	246.1	Jurkat_TiO2_1mg_3_f09350	Jurkat	TiO2	3	f09350
sp|Q6PH81|CP087_HUMAN	K.HSEKS#PPSTENKHEAK.R	K.HSEKS#PPSTENKHEAK.R	HSEKSPPSTENKHEAK	1	16	50	23.624	0	0	0	0	121.1	Jurkat_TiO2_1mg_3_f09350	Jurkat	TiO2	3	f09350
sp|Q6NZ67|MZT2B_HUMAN	K.GGGPGKS#PTR.G	K.GGGPGKS#PTR.G	GGGPGKSPTR	1	10	152	30.835	0	0	0	0	15078	Jurkat_TiO2_1mg_3_f09350	Jurkat	TiO2	3	f09350
sp|Q5SW79|CE170_HUMAN	K.HDDGT#QSDSENAGAHRR.C	K.HDDGT#QSDSENAGAHRR.C	HDDGTQSDSENAGAHRR	1	17	377	6.591	0	0	0	0	238.8	Jurkat_TiO2_1mg_3_f09350	Jurkat	TiO2	3	f09350
sp|Q14103|HNRPD_HUMAN	K.NEEDEGHSNSS#PR.H	K.NEEDEGHSNSS#PR.H	NEEDEGHSNSSPR	1	13	83	9.34	0	0	0	0	30445.9	Jurkat_TiO2_1mg_3_f09350	Jurkat	TiO2	3	f09350
sp|Q03111|ENL_HUMAN	R.RS#PESCSKPEK.I	R.RSPES#CSKPEK.I	RSPESCSKPEK	1	11	475	23.624	0	0	0	0	677.1	Jurkat_TiO2_1mg_3_f09350	Jurkat	TiO2	3	f09350
sp|Q7L4I2|RSRC2_HUMAN	R.LNS#S#ENGEDRHK.R	R.LNS#S#ENGEDRHK.R	LNSSENGEDRHK	2	12	104	1000	105	1000	0	0	451.8	Jurkat_TiO2_1mg_3_f09350	Jurkat	TiO2	3	f09350
sp|P78559|MAP1A_HUMAN	K.AKPAS#PAR.R	K.AKPAS#PAR.R	AKPASPAR	1	8	2617	1000	0	0	0	0	3824.3	Jurkat_TiO2_1mg_3_f09350	Jurkat	TiO2	3	f09350
sp|Q86VM9|ZCH18_HUMAN	K.RPNTS#PDRGSR.D	K.RPNTS#PDRGSR.D	RPNTSPDRGSR	1	11	852	0	0	0	0	0	5771.6	Jurkat_TiO2_1mg_3_f09350	Jurkat	TiO2	3	f09350
sp|Q86X95|CIR1_HUMAN	K.WSHS#DSDKK.S	K.WSHS#DSDKK.S	WSHSDSDKK	1	9	353	17.009	0	0	0	0	175	Jurkat_TiO2_1mg_3_f09350	Jurkat	TiO2	3	f09350
sp|Q5T5Y3|CAMP1_HUMAN	K.S#VHREESCSDSGTK.C	K.S#VHREESCSDSGTK.C	SVHREESCSDSGTK	1	14	1372	56.122	0	0	0	0	522.9	Jurkat_TiO2_1mg_3_f09350	Jurkat	TiO2	3	f09350
sp|P62851|RS25_HUMAN		K.DKDPVNK.S	DKDPVNK	0	7	0	0	0	0	0	0	213.6	Jurkat_TiO2_1mg_3_f09350	Jurkat	TiO2	3	f09350
sp|Q9UQ35|SRRM2_HUMAN	K.AKS#RT#PPR.R	K.AKS#RT#PPR.R	AKSRTPPR	2	8	808	1000	810	1000	0	0	114.7	Jurkat_TiO2_1mg_3_f09350	Jurkat	TiO2	3	f09350
sp|P62995|TRA2B_HUMAN	R.RHSHS#HS#PMSTR.R	R.RHSHS#HS#PMSTR.R	RHSHSHSPMSTR	2	12	97	4.085	99	6.039	0	0	1103.7	Jurkat_TiO2_1mg_3_f09350	Jurkat	TiO2	3	f09350
sp|Q14103|HNRPD_HUMAN	K.NEEDEGHSNS#SPR.H	K.NEEDEGHSNS#SPR.H	NEEDEGHSNSSPR	1	13	82	0	0	0	0	0	15795	Jurkat_TiO2_1mg_3_f09350	Jurkat	TiO2	3	f09350
sp|Q7L4I2|RSRC2_HUMAN	R.LNS#S#ENGEDRHK.R	R.LNS#S#ENGEDRHK.R	LNSSENGEDRHK	2	12	104	1000	105	1000	0	0	386.2	Jurkat_TiO2_1mg_3_f09350	Jurkat	TiO2	3	f09350
sp|Q13523|PRP4B_HUMAN	K.KPIKS#PSK.D	K.KPIKS#PSK.D	KPIKSPSK	1	8	328	30.835	0	0	0	0	7736.3	Jurkat_TiO2_1mg_3_f09350	Jurkat	TiO2	3	f09350
sp|Q14978|NOLC1_HUMAN	K.AAKNS#EEEEEEK.K	K.AAKNS#EEEEEEK.K	AAKNSEEEEEEK	1	12	563	1000	0	0	0	0	8137.7	Jurkat_TiO2_1mg_3_f09350	Jurkat	TiO2	3	f09350
sp|Q9ULL1|PKHG1_HUMAN	K.QQLLS#LHR.S	K.QQLLS#LHR.S	QQLLSLHR	1	8	1209	1000	0	0	0	0	97	Jurkat_TiO2_1mg_3_f09350	Jurkat	TiO2	3	f09350
sp|Q14978|NOLC1_HUMAN	K.AAKNS#EEEEEEK.K	K.AAKNS#EEEEEEK.K	AAKNSEEEEEEK	1	12	563	1000	0	0	0	0	25333.6	Jurkat_TiO2_1mg_3_f09350	Jurkat	TiO2	3	f09350
sp|P06748|NPM_HUMAN	K.DSKPSST#PR.S	K.DSKPSST#PR.S	DSKPSSTPR	1	9	219	0	0	0	0	0	13464.7	Jurkat_TiO2_1mg_3_f09350	Jurkat	TiO2	3	f09350
sp|Q9UQ35|SRRM2_HUMAN	K.TPSRQS#HSSSS#PHPK.V	K.TPSRQS#HSSSS#PHPK.V	TPSRQSHSSSSPHPK	2	15	834	0	839	9.34	0	0	25.8	Jurkat_TiO2_1mg_3_f09350	Jurkat	TiO2	3	f09350
sp|Q9UKS7|IKZF2_HUMAN	K.RKQS#PAYM*K.E	K.RKQS#PAYM*K.E	RKQSPAYMK	1	9	433	24.243	0	0	0	0	1526.5	Jurkat_TiO2_1mg_3_f09350	Jurkat	TiO2	3	f09350
sp|Q9NRR4|RNC_HUMAN	K.APS#ERRSPER.L	K.APSERRS#PER.L	APSERRSPER	1	10	217	11.721	0	0	0	0	621.7	Jurkat_TiO2_1mg_3_f09350	Jurkat	TiO2	3	f09350
sp|O15042|SR140_HUMAN	K.DECT#PTRK.E	K.DECT#PTRK.E	DECTPTRK	1	8	919	6.591	0	0	0	0	289.6	Jurkat_TiO2_1mg_3_f09350	Jurkat	TiO2	3	f09350
sp|Q13435|SF3B2_HUMAN	R.GVSSESS#GDREK.D	R.GVSSES#SGDREK.D	GVSSESSGDREK	1	12	347	9.34	0	0	0	0	287.9	Jurkat_TiO2_1mg_3_f09350	Jurkat	TiO2	3	f09350
sp|Q9NWH9|SLTM_HUMAN	K.KGPSS#TGASGQAK.S	K.KGPSS#TGASGQAK.S	KGPSSTGASGQAK	1	13	344	0	0	0	0	0	475.8	Jurkat_TiO2_1mg_3_f09350	Jurkat	TiO2	3	f09350
sp|P27824|CALX_HUMAN		K.DKGDEEEEGEEK.L	DKGDEEEEGEEK	0	12	0	0	0	0	0	0	110.5	Jurkat_TiO2_1mg_3_f09350	Jurkat	TiO2	3	f09350
sp|Q99590|SCAFB_HUMAN	K.KRPQS#PSPR.R	K.KRPQSPS#PR.R	KRPQSPSPR	1	9	816	17.009	0	0	0	0	277.3	Jurkat_TiO2_1mg_3_f09350	Jurkat	TiO2	3	f09350
sp|Q9P275|UBP36_HUMAN	R.RGSSSS#SPEHSASSDSTK.A	R.RGS#SSSSPEHSASSDSTK.A	RGSSSSSPEHSASSDSTK	1	18	613	4.085	0	0	0	0	149.4	Jurkat_TiO2_1mg_3_f09350	Jurkat	TiO2	3	f09350
sp|Q12906|ILF3_HUMAN	K.RPM*EEDGEEKS#PSKK.K	K.RPM*EEDGEEKS#PSKK.K	RPMEEDGEEKSPSKK	1	15	382	11.015	0	0	0	0	6081.7	Jurkat_TiO2_1mg_3_f09350	Jurkat	TiO2	3	f09350
sp|Q99590|SCAFB_HUMAN	K.KRPQS#PS#PRR.E	K.KRPQS#PS#PRR.E	KRPQSPSPRR	2	10	816	1000	818	1000	0	0	1321.2	Jurkat_TiO2_1mg_3_f09350	Jurkat	TiO2	3	f09350
sp|Q9UQ35|SRRM2_HUMAN	R.S#RS#RAS#PATHR.R	R.S#RS#RAS#PATHR.R	SRSRASPATHR	3	11	1864	88.626	1866	71.753	1869	53.534	1195.4	Jurkat_TiO2_1mg_3_f09350	Jurkat	TiO2	3	f09350
sp|Q9UQ35|SRRM2_HUMAN	R.YSHSGSSS#PDTK.V	R.YSHSGSSS#PDTK.V	YSHSGSSSPDTK	1	12	974	9.34	0	0	0	0	320.1	Jurkat_TiO2_1mg_3_f09350	Jurkat	TiO2	3	f09350
sp|Q9H8Y5|ANKZ1_HUMAN	R.TSCSGSGERES#PERK.L	R.TSCSGS#GERESPERK.L	TSCSGSGERESPERK	1	15	56	22.492	0	0	0	0	598.8	Jurkat_TiO2_1mg_3_f09350	Jurkat	TiO2	3	f09350
sp|Q9H1E3|NUCKS_HUMAN	K.DDSHS#AEDS#EDEKEDHK.N	K.DDSHS#AEDS#EDEKEDHK.N	DDSHSAEDSEDEKEDHK	2	17	75	20.167	79	42.869	0	0	10823.9	Jurkat_TiO2_1mg_3_f09350	Jurkat	TiO2	3	f09350
sp|P62995|TRA2B_HUMAN	R.RHS#HSHS#PMSTR.R	R.RHS#HSHS#PMSTR.R	RHSHSHSPMSTR	2	12	95	11.015	99	0	0	0	554.8	Jurkat_TiO2_1mg_3_f09350	Jurkat	TiO2	3	f09350
sp|Q12906|ILF3_HUMAN	K.RPM*EEDGEEKS#PSKK.K	K.RPM*EEDGEEKS#PSKK.K	RPMEEDGEEKSPSKK	1	15	382	4.085	0	0	0	0	3141.2	Jurkat_TiO2_1mg_3_f09350	Jurkat	TiO2	3	f09350
sp|P26599|PTBP1_HUMAN	K.TDSS#PNQAR.A	K.TDSS#PNQAR.A	TDSSPNQAR	1	9	141	9.34	0	0	0	0	3038.2	Jurkat_TiO2_1mg_3_f09350	Jurkat	TiO2	3	f09350
sp|Q8IWS0|PHF6_HUMAN	R.SPHRS#SPSDTRPK.C	R.SPHRSS#PSDTRPK.C	SPHRSSPSDTRPK	1	13	203	2.576	0	0	0	0	128.1	Jurkat_TiO2_1mg_3_f09350	Jurkat	TiO2	3	f09350
sp|Q12906|ILF3_HUMAN	K.RPM*EEDGEEKSPS#KK.K	K.RPM*EEDGEEKS#PSKK.K	RPMEEDGEEKSPSKK	1	15	384	17.009	0	0	0	0	887.3	Jurkat_TiO2_1mg_3_f09350	Jurkat	TiO2	3	f09350
sp|P06748|NPM_HUMAN	K.QEKT#PKT#PK.G	K.QEKT#PKT#PK.G	QEKTPKTPK	2	9	234	1000	237	1000	0	0	74.8	Jurkat_TiO2_1mg_3_f09350	Jurkat	TiO2	3	f09350
sp|Q9H307|PININ_HUMAN	R.KRS#IS#ESS#RSGK.R	R.KRS#IS#ES#SRSGK.R	KRSISESSRSGK	3	12	690	76.733	692	30.835	695	9.34	3757	Jurkat_TiO2_1mg_3_f09350	Jurkat	TiO2	3	f09350
sp|Q9UQ35|SRRM2_HUMAN	R.SRTS#VTR.R	R.SRTS#VTR.R	SRTSVTR	1	7	1905	9.34	0	0	0	0	1370.6	Jurkat_TiO2_1mg_3_f09350	Jurkat	TiO2	3	f09350
sp|Q6RFH5|WDR74_HUMAN	K.KRPGSTS#P.-	K.KRPGSTS#P.-	KRPGSTSP	1	8	384	9.34	0	0	0	0	5810.8	Jurkat_TiO2_1mg_3_f09350	Jurkat	TiO2	3	f09350
sp|Q9BUQ8|DDX23_HUMAN	K.DRDAS#PSKEER.K	K.DRDAS#PSKEER.K	DRDASPSKEER	1	11	14	31.275	0	0	0	0	5003.5	Jurkat_TiO2_1mg_3_f09350	Jurkat	TiO2	3	f09350
sp|P83916|CBX1_HUMAN	K.ADS#DSEDKGEESKPK.K	K.ADS#DSEDKGEESKPK.K	ADSDSEDKGEESKPK	1	15	89	31.275	0	0	0	0	2400.3	Jurkat_TiO2_1mg_3_f09350	Jurkat	TiO2	3	f09350
sp|P83916|CBX1_HUMAN	K.ADS#DSEDKGEESKPK.K	K.ADS#DSEDKGEESKPK.K	ADSDSEDKGEESKPK	1	15	89	17.009	0	0	0	0	1151.2	Jurkat_TiO2_1mg_3_f09350	Jurkat	TiO2	3	f09350
sp|O75554|WBP4_HUMAN	K.NKNS#DGGS#DPETQK.E	K.NKNS#DGGS#DPETQK.E	NKNSDGGSDPETQK	2	14	258	58.551	262	44.278	0	0	240.9	Jurkat_TiO2_1mg_3_f09350	Jurkat	TiO2	3	f09350
sp|Q92538|GBF1_HUMAN	K.QKRS#PRPPR.H	K.QKRS#PRPPR.H	QKRSPRPPR	1	9	233	1000	0	0	0	0	2058.8	Jurkat_TiO2_1mg_3_f09350	Jurkat	TiO2	3	f09350
sp|Q13131|AAPK1_HUMAN	R.SCQRSDS#DAEAQGK.S	R.SCQRSDS#DAEAQGK.S	SCQRSDSDAEAQGK	1	14	508	17.009	0	0	0	0	77.2	Jurkat_TiO2_1mg_3_f09350	Jurkat	TiO2	3	f09350
sp|Q9Y2W1|TR150_HUMAN	K.NKKS#PEIHR.R	K.NKKS#PEIHR.R	NKKSPEIHR	1	9	672	1000	0	0	0	0	7863.4	Jurkat_TiO2_1mg_3_f09350	Jurkat	TiO2	3	f09350
sp|Q9BUQ8|DDX23_HUMAN	K.DRDAS#PSKEER.K	K.DRDAS#PSKEER.K	DRDASPSKEER	1	11	14	6.591	0	0	0	0	2390.7	Jurkat_TiO2_1mg_3_f09350	Jurkat	TiO2	3	f09350
sp|Q92922|SMRC1_HUMAN	K.KDSENT#PVK.G	K.KDSENT#PVK.G	KDSENTPVK	1	9	398	53.534	0	0	0	0	361.9	Jurkat_TiO2_1mg_3_f09350	Jurkat	TiO2	3	f09350
sp|Q5SSJ5|HP1B3_HUMAN	R.LQKKT#PAKS#PGK.A	R.LQKKT#PAKS#PGK.A	LQKKTPAKSPGK	2	12	461	1000	465	1000	0	0	604.6	Jurkat_TiO2_1mg_3_f09350	Jurkat	TiO2	3	f09350
sp|P58876|H2B1D_HUMAN		K.RSTITSR.E	RSTITSR	0	7	0	0	0	0	0	0	3212.1	Jurkat_TiO2_1mg_3_f09350	Jurkat	TiO2	3	f09350
sp|Q5SSJ5|HP1B3_HUMAN	R.LQKKT#PAKS#PGK.A	R.LQKKT#PAKS#PGK.A	LQKKTPAKSPGK	2	12	461	1000	465	1000	0	0	184.2	Jurkat_TiO2_1mg_3_f09350	Jurkat	TiO2	3	f09350
sp|P33981|TTK_HUMAN	R.NLKS#VQNS#HFK.E	R.NLKS#VQNS#HFK.E	NLKSVQNSHFK	2	11	329	1000	333	1000	0	0	158.1	Jurkat_TiO2_1mg_3_f09350	Jurkat	TiO2	3	f09350
sp|Q96T58|MINT_HUMAN	K.KSS#PEM*EDAR.V	K.KSS#PEM*EDAR.V	KSSPEMEDAR	1	10	1006	9.34	0	0	0	0	202.9	Jurkat_TiO2_1mg_3_f09350	Jurkat	TiO2	3	f09350
sp|Q7Z6E9|RBBP6_HUMAN	K.VDGERERS#PR.S	K.VDGERERS#PR.S	VDGERERSPR	1	10	1052	1000	0	0	0	0	2649.1	Jurkat_TiO2_1mg_3_f09350	Jurkat	TiO2	3	f09350
sp|Q14739|LBR_HUMAN	R.SRS#PGRPPK.S	R.SRS#PGRPPK.S	SRSPGRPPK	1	9	86	19.843	0	0	0	0	2413	Jurkat_TiO2_1mg_3_f09350	Jurkat	TiO2	3	f09350
sp|Q96MU7|YTDC1_HUMAN	R.RAKS#PT#PDGSER.I	R.RAKS#PT#PDGSER.I	RAKSPTPDGSER	2	12	146	52.403	148	47.045	0	0	2162.3	Jurkat_TiO2_1mg_3_f09350	Jurkat	TiO2	3	f09350
sp|Q9HCM7|FBSL_HUMAN	K.ES#RSPAKEEAAK.M	K.ES#RSPAKEEAAK.M	ESRSPAKEEAAK	1	12	828	6.591	0	0	0	0	167.4	Jurkat_TiO2_1mg_3_f09350	Jurkat	TiO2	3	f09350
sp|Q9H307|PININ_HUMAN	R.KRS#ISESSR.S	R.KRS#ISESSR.S	KRSISESSR	1	9	690	59.298	0	0	0	0	1542.6	Jurkat_TiO2_1mg_3_f09350	Jurkat	TiO2	3	f09350
sp|P07910|HNRPC_HUMAN	K.NDKSEEEQSS#SSVKK.D	K.NDKSEEEQS#SSSVKK.D	NDKSEEEQSSSSVKK	1	15	239	4.085	0	0	0	0	280	Jurkat_TiO2_1mg_3_f09350	Jurkat	TiO2	3	f09350
sp|Q12872|SFSWA_HUMAN	R.VSRS#PGASR.K	R.VSRS#PGASR.K	VSRSPGASR	1	9	834	48.874	0	0	0	0	1598.6	Jurkat_TiO2_1mg_3_f09350	Jurkat	TiO2	3	f09350
sp|Q9H307|PININ_HUMAN	R.KRS#ISESSR.S	R.KRS#ISESSR.S	KRSISESSR	1	9	690	17.009	0	0	0	0	993.1	Jurkat_TiO2_1mg_3_f09350	Jurkat	TiO2	3	f09350
sp|Q9UQ35|SRRM2_HUMAN	K.SGM*S#PEQSR.F	K.SGM*S#PEQSR.F	SGMSPEQSR	1	9	1132	48.874	0	0	0	0	1850.1	Jurkat_TiO2_1mg_3_f09350	Jurkat	TiO2	3	f09350
sp|Q9BU76|MMTA2_HUMAN	K.PRAEDQTES#SCESHRK.S	K.PRAEDQTESS#CESHRK.S	PRAEDQTESSCESHRK	1	16	177	6.591	0	0	0	0	2616.2	Jurkat_TiO2_1mg_3_f09350	Jurkat	TiO2	3	f09350
sp|Q9UQ35|SRRM2_HUMAN	K.TPSRQS#HS#S#SSPHPK.V	K.TPSRQS#HSS#SS#PHPK.V	TPSRQSHSSSSPHPK	3	15	834	9.296	836	5.085	837	5.085	184.8	Jurkat_TiO2_1mg_3_f09350	Jurkat	TiO2	3	f09350
sp|Q9UPN6|SCAF8_HUMAN	R.SYS#SERR.A	R.SYS#SERR.A	SYSSERR	1	7	447	24.437	0	0	0	0	465.2	Jurkat_TiO2_1mg_3_f09350	Jurkat	TiO2	3	f09350
sp|Q9UQ35|SRRM2_HUMAN	R.RRET#PS#PR.P	R.RRET#PS#PR.P	RRETPSPR	2	8	2738	1000	2740	1000	0	0	58.5	Jurkat_TiO2_1mg_3_f09350	Jurkat	TiO2	3	f09350
sp|P14618|KPYM_HUMAN	R.KAS#DVHEVRK.V	R.KAS#DVHEVRK.V	KASDVHEVRK	1	10	249	1000	0	0	0	0	56	Jurkat_TiO2_1mg_3_f09350	Jurkat	TiO2	3	f09350
sp|Q9Y520|PRC2C_HUMAN	K.RSVSHGSNHT#QKPDEQR.S	K.RSVS#HGSNHTQKPDEQR.S	RSVSHGSNHTQKPDEQR	1	17	932	7.971	0	0	0	0	335.7	Jurkat_TiO2_1mg_3_f09350	Jurkat	TiO2	3	f09350
sp|Q5T200|ZC3HD_HUMAN	R.RSS#PESDRQVHSR.S	R.RSS#PESDRQVHSR.S	RSSPESDRQVHSR	1	13	1279	6.591	0	0	0	0	646.1	Jurkat_TiO2_1mg_3_f09350	Jurkat	TiO2	3	f09350
sp|P16402|H13_HUMAN	K.KVAGAAT#PKK.S	K.KVAGAAT#PKK.S	KVAGAATPKK	1	10	147	1000	0	0	0	0	1936	Jurkat_TiO2_1mg_3_f09350	Jurkat	TiO2	3	f09350
sp|Q13427|PPIG_HUMAN	R.NVSES#PNRK.N	R.NVSES#PNRK.N	NVSESPNRK	1	9	415	30.835	0	0	0	0	3235.9	Jurkat_TiO2_1mg_3_f09350	Jurkat	TiO2	3	f09350
sp|A2RRP1|NBAS_HUMAN	K.RNS#EDEAQEAK.D	K.RNS#EDEAQEAK.D	RNSEDEAQEAK	1	11	1937	1000	0	0	0	0	57.1	Jurkat_TiO2_1mg_3_f09350	Jurkat	TiO2	3	f09350
sp|Q8IUD2|RB6I2_HUMAN	R.RTNS#TGGSSGSSVGGGSGK.T	R.RTNS#TGGSSGSSVGGGSGK.T	RTNSTGGSSGSSVGGGSGK	1	19	37	6.591	0	0	0	0	114.6	Jurkat_TiO2_1mg_3_f09350	Jurkat	TiO2	3	f09350
sp|Q9UKJ3|GPTC8_HUMAN	R.HSKRS#HDS#DDS#DYASSK.H	R.HSKRS#HDS#DDS#DYASSK.H	HSKRSHDSDDSDYASSK	3	17	908	9.296	911	22.492	914	4.085	458	Jurkat_TiO2_1mg_3_f09350	Jurkat	TiO2	3	f09350
sp|P39687|AN32A_HUMAN		K.RKREPEDEGEDDD.-	RKREPEDEGEDDD	0	13	0	0	0	0	0	0	18293.2	Jurkat_TiO2_1mg_3_f09350	Jurkat	TiO2	3	f09350
sp|Q99442|SEC62_HUMAN	K.SDS#EEKSDS#EKKEDEEGK.V	K.S#DSEEKS#DSEKKEDEEGK.V	SDSEEKSDSEKKEDEEGK	2	18	309	0	315	6.591	0	0	391	Jurkat_TiO2_1mg_3_f09350	Jurkat	TiO2	3	f09350
sp|Q9H1E3|NUCKS_HUMAN	K.DDS#HSAEDS#EDEKEDHK.N	K.DDSHS#AEDS#EDEKEDHK.N	DDSHSAEDSEDEKEDHK	2	17	73	11.015	79	18.805	0	0	45543	Jurkat_TiO2_1mg_3_f09350	Jurkat	TiO2	3	f09350
sp|Q9UKJ3|GPTC8_HUMAN	R.HSKRS#HDS#DDS#DYASSK.H	R.HSKRS#HDS#DDS#DYASSK.H	HSKRSHDSDDSDYASSK	3	17	908	39.663	911	40.362	914	40.362	66.3	Jurkat_TiO2_1mg_3_f09350	Jurkat	TiO2	3	f09350
sp|Q8IYB3|SRRM1_HUMAN	K.RRVS#HS#PPPK.Q	K.RRVS#HS#PPPK.Q	RRVSHSPPPK	2	10	636	1000	638	1000	0	0	36041.5	Jurkat_TiO2_1mg_3_f09350	Jurkat	TiO2	3	f09350
sp|Q9UQ35|SRRM2_HUMAN	R.RGS#RS#S#PEPK.T	R.RGS#RS#S#PEPK.T	RGSRSSPEPK	3	10	1672	1000	1674	1000	1675	1000	3706.7	Jurkat_TiO2_1mg_3_f09350	Jurkat	TiO2	3	f09350
sp|Q9H1E3|NUCKS_HUMAN	K.DDSHS#AEDS#EDEKEDHK.N	K.DDSHS#AEDS#EDEKEDHK.N	DDSHSAEDSEDEKEDHK	2	17	75	17.009	79	57.711	0	0	83.8	Jurkat_TiO2_1mg_3_f09350	Jurkat	TiO2	3	f09350
sp|Q14978|NOLC1_HUMAN	K.NS#EEEEEEK.K	K.NS#EEEEEEK.K	NSEEEEEEK	1	9	563	1000	0	0	0	0	217.9	Jurkat_TiO2_1mg_3_f09350	Jurkat	TiO2	3	f09350
sp|O15042|SR140_HUMAN	R.VKS#PS#PK.S	R.VKS#PS#PK.S	VKSPSPK	2	7	946	1000	948	1000	0	0	4967.2	Jurkat_TiO2_1mg_3_f09350	Jurkat	TiO2	3	f09350
sp|Q6PJW8|CNST_HUMAN	K.KIPGKRS#PR.S	K.KIPGKRS#PR.S	KIPGKRSPR	1	9	113	1000	0	0	0	0	136.3	Jurkat_TiO2_1mg_3_f09350	Jurkat	TiO2	3	f09350
sp|Q6PKG0|LARP1_HUMAN	K.RHS#VVAGGGGGEGRK.R	K.RHS#VVAGGGGGEGRK.R	RHSVVAGGGGGEGRK	1	15	1040	1000	0	0	0	0	107.3	Jurkat_TiO2_1mg_3_f09350	Jurkat	TiO2	3	f09350
sp|Q9NQW6|ANLN_HUMAN	K.SCTKPS#PSK.K	K.SCTKPS#PSK.K	SCTKPSPSK	1	9	65	17.009	0	0	0	0	938	Jurkat_TiO2_1mg_3_f09350	Jurkat	TiO2	3	f09350
sp|Q99590|SCAFB_HUMAN	K.KRPQS#PS#PR.R	K.KRPQS#PS#PR.R	KRPQSPSPR	2	9	816	1000	818	1000	0	0	4299	Jurkat_TiO2_1mg_3_f09350	Jurkat	TiO2	3	f09350
sp|Q99590|SCAFB_HUMAN	K.KRPQS#PS#PR.R	K.KRPQS#PS#PR.R	KRPQSPSPR	2	9	816	1000	818	1000	0	0	4559	Jurkat_TiO2_1mg_3_f09350	Jurkat	TiO2	3	f09350
sp|O76021|RL1D1_HUMAN	K.DARQT#PKKPEAK.F	K.DARQT#PKKPEAK.F	DARQTPKKPEAK	1	12	454	1000	0	0	0	0	1486.4	Jurkat_TiO2_1mg_3_f09350	Jurkat	TiO2	3	f09350
sp|Q9BVI0|PHF20_HUMAN	R.SKGDSDPKPGS#PK.V	R.SKGDSDPKPGS#PK.V	SKGDSDPKPGSPK	1	13	902	62.659	0	0	0	0	324.2	Jurkat_TiO2_1mg_3_f09350	Jurkat	TiO2	3	f09350
sp|Q9NQW6|ANLN_HUMAN	K.DTSRSDES#PKPGK.F	K.DTSRSDES#PKPGK.F	DTSRSDESPKPGK	1	13	642	24.243	0	0	0	0	217.9	Jurkat_TiO2_1mg_3_f09350	Jurkat	TiO2	3	f09350
sp|Q9H1E3|NUCKS_HUMAN	K.DDS#HS#AEDS#EDEKEDHK.N	K.DDS#HS#AEDS#EDEKEDHK.N	DDSHSAEDSEDEKEDHK	3	17	73	1000	75	1000	79	1000	745.5	Jurkat_TiO2_1mg_3_f09350	Jurkat	TiO2	3	f09350
sp|Q9UQ35|SRRM2_HUMAN	R.GRS#PS#PKPR.G	R.GRS#PS#PKPR.G	GRSPSPKPR	2	9	1762	1000	1764	1000	0	0	8638.1	Jurkat_TiO2_1mg_3_f09350	Jurkat	TiO2	3	f09350
sp|Q9H1E3|NUCKS_HUMAN	K.DDS#HS#AEDS#EDEKEDHK.N	K.DDS#HS#AEDS#EDEKEDHK.N	DDSHSAEDSEDEKEDHK	3	17	73	1000	75	1000	79	1000	2319.5	Jurkat_TiO2_1mg_3_f09350	Jurkat	TiO2	3	f09350
sp|Q12996|CSTF3_HUMAN	K.RPNEDS#DEDEEK.G	K.RPNEDS#DEDEEK.G	RPNEDSDEDEEK	1	12	691	1000	0	0	0	0	8738.9	Jurkat_TiO2_1mg_3_f09350	Jurkat	TiO2	3	f09350
sp|Q6PD62|CTR9_HUMAN	R.RKGS#GS#EQEGEDEEGGERK.K	R.RKGS#GS#EQEGEDEEGGERK.K	RKGSGSEQEGEDEEGGERK	2	19	941	1000	943	1000	0	0	294	Jurkat_TiO2_1mg_3_f09350	Jurkat	TiO2	3	f09350
sp|Q32P44|EMAL3_HUMAN	R.RNS#SSSSSPSERPR.Q	R.RNSS#SSSSPSERPR.Q	RNSSSSSSPSERPR	1	14	156	6.591	0	0	0	0	340.4	Jurkat_TiO2_1mg_3_f09350	Jurkat	TiO2	3	f09350
sp|Q12996|CSTF3_HUMAN	K.RPNEDS#DEDEEK.G	K.RPNEDS#DEDEEK.G	RPNEDSDEDEEK	1	12	691	1000	0	0	0	0	2617.4	Jurkat_TiO2_1mg_3_f09350	Jurkat	TiO2	3	f09350
sp|Q9UQ35|SRRM2_HUMAN	R.YSHSGS#SS#PDTK.V	R.YSHSGS#SS#PDTK.V	YSHSGSSSPDTK	2	12	972	9.34	974	9.34	0	0	1410.5	Jurkat_TiO2_1mg_3_f09350	Jurkat	TiO2	3	f09350
sp|Q14103|HNRPD_HUMAN	K.NEEDEGHS#NSS#PR.H	K.NEEDEGHS#NSS#PR.H	NEEDEGHSNSSPR	2	13	80	30.835	83	0	0	0	123.3	Jurkat_TiO2_1mg_3_f09350	Jurkat	TiO2	3	f09350
sp|Q9UQ35|SRRM2_HUMAN	R.YSHS#GSSS#PDTK.V	R.YSHS#GSSS#PDTK.V	YSHSGSSSPDTK	2	12	970	11.015	974	6.591	0	0	142.7	Jurkat_TiO2_1mg_3_f09350	Jurkat	TiO2	3	f09350
sp|P35269|T2FA_HUMAN	K.KAPT#PQEK.K	K.KAPT#PQEK.K	KAPTPQEK	1	8	331	1000	0	0	0	0	1432.2	Jurkat_TiO2_1mg_3_f09350	Jurkat	TiO2	3	f09350
sp|O14681|EI24_HUMAN	R.AQS#IERK.Q	R.AQS#IERK.Q	AQSIERK	1	7	56	1000	0	0	0	0	285.4	Jurkat_TiO2_1mg_3_f09350	Jurkat	TiO2	3	f09350
sp|P43243|MATR3_HUMAN	K.SKTDGS#QKTESSTEGKEQEEK.S	K.SKTDGS#QKTESSTEGKEQEEK.S	SKTDGSQKTESSTEGKEQEEK	1	21	615	4.691	0	0	0	0	93.8	Jurkat_TiO2_1mg_3_f09350	Jurkat	TiO2	3	f09350
sp|Q6PKG0|LARP1_HUMAN	K.GEGSDSKES#PKT#KSDESGEEK.N	K.GEGSDSKES#PKT#KSDESGEEK.N	GEGSDSKESPKTKSDESGEEK	2	21	220	4.691	223	0	0	0	79.5	Jurkat_TiO2_1mg_3_f09350	Jurkat	TiO2	3	f09350
sp|Q14103|HNRPD_HUMAN	K.NEEDEGHS#NSSPR.H	K.NEEDEGHS#NSSPR.H	NEEDEGHSNSSPR	1	13	80	30.835	0	0	0	0	381.7	Jurkat_TiO2_1mg_3_f09350	Jurkat	TiO2	3	f09350
sp|Q96ST2|IWS1_HUMAN	K.QKMDS#DEDEK.E	K.QKMDS#DEDEK.E	QKMDSDEDEK	1	10	377	1000	0	0	0	0	561.3	Jurkat_TiO2_1mg_3_f09350	Jurkat	TiO2	3	f09350
sp|O75554|WBP4_HUMAN	K.NSDGGS#DPETQK.E	K.NSDGGS#DPETQK.E	NSDGGSDPETQK	1	12	262	44.278	0	0	0	0	2339.6	Jurkat_TiO2_1mg_3_f09350	Jurkat	TiO2	3	f09350
sp|Q9UQ35|SRRM2_HUMAN	R.HSCSGSS#PPR.V	R.HSCSGSS#PPR.V	HSCSGSSPPR	1	10	895	0	0	0	0	0	755	Jurkat_TiO2_1mg_3_f09350	Jurkat	TiO2	3	f09350
sp|Q96ST2|IWS1_HUMAN	K.KFHSS#DS#EEEEHKK.Q	K.KFHSS#DS#EEEEHKK.Q	KFHSSDSEEEEHKK	2	14	363	0	365	24.243	0	0	2420.2	Jurkat_TiO2_1mg_3_f09350	Jurkat	TiO2	3	f09350
sp|Q96ST2|IWS1_HUMAN	K.KFHSS#DS#EEEEHKK.Q	K.KFHSS#DS#EEEEHKK.Q	KFHSSDSEEEEHKK	2	14	363	9.34	365	37.54	0	0	2420.2	Jurkat_TiO2_1mg_3_f09350	Jurkat	TiO2	3	f09350
sp|Q5T200|ZC3HD_HUMAN	K.RNTEESSS#PVRK.E	K.RNTEESSS#PVRK.E	RNTEESSSPVRK	1	12	110	6.591	0	0	0	0	10685.3	Jurkat_TiO2_1mg_3_f09350	Jurkat	TiO2	3	f09350
sp|Q6PH81|CP087_HUMAN	K.HSEKS#PPSTENK.H	K.HSEKS#PPSTENK.H	HSEKSPPSTENK	1	12	50	8.594	0	0	0	0	1326.6	Jurkat_TiO2_1mg_3_f09350	Jurkat	TiO2	3	f09350
sp|Q96ST2|IWS1_HUMAN	K.KFHSS#DS#EEEEHKK.Q	K.KFHSS#DS#EEEEHKK.Q	KFHSSDSEEEEHKK	2	14	363	0	365	2.806	0	0	9703.2	Jurkat_TiO2_1mg_3_f09350	Jurkat	TiO2	3	f09350
sp|Q92934|BAD_HUMAN	K.S#AGTATQM*R.Q	K.S#AGTATQM*R.Q	SAGTATQMR	1	9	134	37.54	0	0	0	0	413.7	Jurkat_TiO2_1mg_3_f09350	Jurkat	TiO2	3	f09350
sp|Q9H1E3|NUCKS_HUMAN	K.DDS#HS#AEDS#EDEKEDHK.N	K.DDS#HS#AEDS#EDEKEDHK.N	DDSHSAEDSEDEKEDHK	3	17	73	1000	75	1000	79	1000	2319.5	Jurkat_TiO2_1mg_3_f09350	Jurkat	TiO2	3	f09350
sp|Q9UK53|ING1_HUMAN	R.NNENRENAS#SNHDHDDGASGTPK.E	R.NNENRENASSNHDHDDGAS#GTPK.E	NNENRENASSNHDHDDGASGTPK	1	23	306	0	0	0	0	0	91.8	Jurkat_TiO2_1mg_3_f09350	Jurkat	TiO2	3	f09350
sp|Q15435|PP1R7_HUMAN	R.VESEES#GDEEGKK.H	R.VESEES#GDEEGKK.H	VESEESGDEEGKK	1	13	27	7.971	0	0	0	0	171.7	Jurkat_TiO2_1mg_3_f09350	Jurkat	TiO2	3	f09350
sp|Q14157|UBP2L_HUMAN	K.KAS#LTSK.I	K.KAS#LTSK.I	KASLTSK	1	7	493	6.591	0	0	0	0	698.2	Jurkat_TiO2_1mg_3_f09350	Jurkat	TiO2	3	f09350
sp|Q8IWS0|PHF6_HUMAN		K.NHSGNDERDEEDEERESK.S	NHSGNDERDEEDEERESK	0	18	0	0	0	0	0	0	674.8	Jurkat_TiO2_1mg_3_f09350	Jurkat	TiO2	3	f09350
sp|P07910|HNRPC_HUMAN	K.NDKSEEEQSSSS#VK.K	K.NDKSEEEQSSSS#VK.K	NDKSEEEQSSSSVK	1	14	241	9.34	0	0	0	0	271	Jurkat_TiO2_1mg_3_f09350	Jurkat	TiO2	3	f09350
sp|P25205|MCM3_HUMAN	K.KRSEDESET#EDEEEK.S	K.KRSEDESET#EDEEEK.S	KRSEDESETEDEEEK	1	15	674	44.278	0	0	0	0	76.9	Jurkat_TiO2_1mg_3_f09350	Jurkat	TiO2	3	f09350
sp|Q8IWS0|PHF6_HUMAN		K.NHSGNDERDEEDEERESK.S	NHSGNDERDEEDEERESK	0	18	0	0	0	0	0	0	113.8	Jurkat_TiO2_1mg_3_f09350	Jurkat	TiO2	3	f09350
sp|Q6PD62|CTR9_HUMAN	K.RRKGS#GS#EQEGEDEEGGER.K	K.RRKGS#GS#EQEGEDEEGGER.K	RRKGSGSEQEGEDEEGGER	2	19	941	1000	943	1000	0	0	569.2	Jurkat_TiO2_1mg_3_f09350	Jurkat	TiO2	3	f09350
sp|P04406|G3P_HUMAN		K.AGAHLQGGAK.R	AGAHLQGGAK	0	10	0	0	0	0	0	0	163.2	Jurkat_TiO2_1mg_3_f09350	Jurkat	TiO2	3	f09350
sp|Q6PD62|CTR9_HUMAN	K.RRKGS#GS#EQEGEDEEGGER.K	K.RRKGS#GS#EQEGEDEEGGER.K	RRKGSGSEQEGEDEEGGER	2	19	941	1000	943	1000	0	0	188	Jurkat_TiO2_1mg_3_f09350	Jurkat	TiO2	3	f09350
sp|Q9UQ35|SRRM2_HUMAN	R.GGSGYHS#RS#PAR.Q	R.GGSGYHS#RS#PAR.Q	GGSGYHSRSPAR	2	12	1822	4.085	1824	6.039	0	0	125	Jurkat_TiO2_1mg_3_f09350	Jurkat	TiO2	3	f09350
sp|Q9BZZ5|API5_HUMAN	K.RASEDTTSGS#PPKK.S	K.RASEDTTSGS#PPKK.S	RASEDTTSGSPPKK	1	14	464	20.167	0	0	0	0	37157.5	Jurkat_TiO2_1mg_3_f09350	Jurkat	TiO2	3	f09350
sp|Q96C57|CL043_HUMAN	R.EKEES#PQPR.R	R.EKEES#PQPR.R	EKEESPQPR	1	9	138	1000	0	0	0	0	1815.8	Jurkat_TiO2_1mg_3_f09350	Jurkat	TiO2	3	f09350
sp|P62995|TRA2B_HUMAN	R.RHS#HS#HS#PMSTR.R	R.RHS#HS#HS#PMSTR.R	RHSHSHSPMSTR	3	12	95	37.549	97	30.612	99	23.624	63200.6	Jurkat_TiO2_1mg_3_f09350	Jurkat	TiO2	3	f09350
sp|P43243|MATR3_HUMAN	R.KRS#YS#PDGK.E	R.KRS#YS#PDGK.E	KRSYSPDGK	2	9	596	24.437	598	0	0	0	4076.1	Jurkat_TiO2_1mg_3_f09350	Jurkat	TiO2	3	f09350
sp|Q8WX93|PALLD_HUMAN	R.SPS#GHPHVR.R	R.SPS#GHPHVR.R	SPSGHPHVR	1	9	1106	7.71	0	0	0	0	217.3	Jurkat_TiO2_1mg_3_f09350	Jurkat	TiO2	3	f09350
sp|Q13428|TCOF_HUMAN	R.AASAPAKES#PRK.G	R.AASAPAKES#PRK.G	AASAPAKESPRK	1	12	446	35.356	0	0	0	0	18331.9	Jurkat_TiO2_1mg_3_f09350	Jurkat	TiO2	3	f09350
sp|P43243|MATR3_HUMAN	R.KRSY#S#PDGK.E	R.KRSY#S#PDGK.E	KRSYSPDGK	2	9	597	6.591	598	20.167	0	0	4163.8	Jurkat_TiO2_1mg_3_f09350	Jurkat	TiO2	3	f09350
sp|P62995|TRA2B_HUMAN	R.RHS#HS#HS#PMSTR.R	R.RHS#HS#HS#PMSTR.R	RHSHSHSPMSTR	3	12	95	51.809	97	38.189	99	37.54	11836.5	Jurkat_TiO2_1mg_3_f09350	Jurkat	TiO2	3	f09350
sp|Q6PKG0|LARP1_HUMAN	K.GEGSDSKES#PKTKS#DES#GEEK.N	K.GEGSDSKES#PKTKS#DES#GEEK.N	GEGSDSKESPKTKSDESGEEK	3	21	220	7.971	225	4.085	228	4.691	1252.1	Jurkat_TiO2_1mg_3_f09350	Jurkat	TiO2	3	f09350
sp|Q13428|TCOF_HUMAN	R.AASAPAKES#PRK.G	R.AASAPAKES#PRK.G	AASAPAKESPRK	1	12	446	45.026	0	0	0	0	4555.3	Jurkat_TiO2_1mg_3_f09350	Jurkat	TiO2	3	f09350
sp|Q14687|GSE1_HUMAN	K.RQT#PS#PR.L	K.RQT#PS#PR.L	RQTPSPR	2	7	838	1000	840	1000	0	0	1625.3	Jurkat_TiO2_1mg_3_f09350	Jurkat	TiO2	3	f09350
sp|P49761|CLK3_HUMAN	R.SY#S#REHEGR.L	R.SY#S#REHEGR.L	SYSREHEGR	2	9	174	0	175	0	0	0	832.1	Jurkat_TiO2_1mg_3_f09350	Jurkat	TiO2	3	f09350
sp|Q9UQ35|SRRM2_HUMAN	R.RGGS#GYHS#RS#PAR.Q	R.RGGS#GYHS#RS#PAR.Q	RGGSGYHSRSPAR	3	13	1818	6.591	1822	6.591	1824	11.015	537.1	Jurkat_TiO2_1mg_3_f09350	Jurkat	TiO2	3	f09350
sp|Q8IYB3|SRRM1_HUMAN	K.RRVS#HS#PPPK.Q	K.RRVS#HS#PPPK.Q	RRVSHSPPPK	2	10	636	1000	638	1000	0	0	36497.1	Jurkat_TiO2_1mg_3_f09350	Jurkat	TiO2	3	f09350
sp|Q8IWS0|PHF6_HUMAN	R.DRS#PHRSS#PSDTRPK.C	R.DRS#PHRSS#PSDTRPK.C	DRSPHRSSPSDTRPK	2	15	199	42.869	204	4.085	0	0	5808.6	Jurkat_TiO2_1mg_3_f09350	Jurkat	TiO2	3	f09350
sp|Q6PKG0|LARP1_HUMAN	K.GEGSDSKES#PKTKS#DES#GEEK.N	K.GEGSDSKES#PKTKS#DES#GEEK.N	GEGSDSKESPKTKSDESGEEK	3	21	220	0	225	17.009	228	26.927	235.1	Jurkat_TiO2_1mg_3_f09350	Jurkat	TiO2	3	f09350
sp|Q14004|CDK13_HUMAN	R.RRS#PS#YSR.H	R.RRS#PS#YSR.H	RRSPSYSR	2	8	367	45.026	369	6.591	0	0	112.7	Jurkat_TiO2_1mg_3_f09350	Jurkat	TiO2	3	f09350
sp|Q8IWS0|PHF6_HUMAN	R.DRS#PHRSS#PSDTRPK.C	R.DRS#PHRSS#PSDTRPK.C	DRSPHRSSPSDTRPK	2	15	199	11.721	204	6.591	0	0	7208.5	Jurkat_TiO2_1mg_3_f09350	Jurkat	TiO2	3	f09350
sp|Q9HCG8|CWC22_HUMAN	R.RGRS#YDSSM*ESR.N	R.RGRS#YDSSM*ESR.N	RGRSYDSSMESR	1	12	61	17.009	0	0	0	0	250.3	Jurkat_TiO2_1mg_3_f09350	Jurkat	TiO2	3	f09350
sp|P62995|TRA2B_HUMAN	R.HSHS#HS#PMSTR.R	R.HS#HSHS#PMSTR.R	HSHSHSPMSTR	2	11	97	22.011	99	36.556	0	0	636.9	Jurkat_TiO2_1mg_3_f09350	Jurkat	TiO2	3	f09350
sp|Q5QJE6|TDIF2_HUMAN	K.KPKVT#PTK.E	K.KPKVT#PTK.E	KPKVTPTK	1	8	129	17.009	0	0	0	0	235.1	Jurkat_TiO2_1mg_3_f09350	Jurkat	TiO2	3	f09350
sp|Q99490|AGAP2_HUMAN	R.RRS#S#AASVGR.A	R.RRS#S#AASVGR.A	RRSSAASVGR	2	10	1177	11.015	1178	13.38	0	0	64	Jurkat_TiO2_1mg_3_f09350	Jurkat	TiO2	3	f09350
sp|O14641|DVL2_HUMAN	K.SGS#GSESEPSSR.G	K.S#GSGSESEPSSR.G	SGSGSESEPSSR	1	12	618	0	0	0	0	0	36.6	Jurkat_TiO2_1mg_3_f09350	Jurkat	TiO2	3	f09350
sp|Q9P2N6|KANL3_HUMAN	R.GSRPAS#PAAK.L	R.GSRPAS#PAAK.L	GSRPASPAAK	1	10	515	20.167	0	0	0	0	536.5	Jurkat_TiO2_1mg_3_f09350	Jurkat	TiO2	3	f09350
sp|Q9BRD0|BUD13_HUMAN	R.HDTPDSS#PR.R	R.HDTPDSS#PR.R	HDTPDSSPR	1	9	127	0	0	0	0	0	218.5	Jurkat_TiO2_1mg_3_f09350	Jurkat	TiO2	3	f09350
sp|P46781|RS9_HUMAN		K.KGQGGAGAGDDEEED.-	KGQGGAGAGDDEEED	0	15	0	0	0	0	0	0	577.1	Jurkat_TiO2_1mg_3_f09350	Jurkat	TiO2	3	f09350
sp|Q9P2R6|RERE_HUMAN	R.SSGRNS#PSAASTSSNDSK.A	R.SSGRNS#PSAASTSSNDSK.A	SSGRNSPSAASTSSNDSK	1	18	613	15.007	0	0	0	0	53.3	Jurkat_TiO2_1mg_3_f09350	Jurkat	TiO2	3	f09350
sp|Q9P2R6|RERE_HUMAN	R.SSGRNSPS#AASTSSNDSK.A	R.SSGRNSPS#AASTSSNDSK.A	SSGRNSPSAASTSSNDSK	1	18	615	4.085	0	0	0	0	88	Jurkat_TiO2_1mg_3_f09350	Jurkat	TiO2	3	f09350
sp|Q96ST2|IWS1_HUMAN	K.QKM*DS#DEDEKEGEEEK.V	K.QKM*DS#DEDEKEGEEEK.V	QKMDSDEDEKEGEEEK	1	16	377	1000	0	0	0	0	1770.2	Jurkat_TiO2_1mg_3_f09350	Jurkat	TiO2	3	f09350
sp|Q96MU7|YTDC1_HUMAN	R.AKS#PT#PDGSER.I	R.AKS#PT#PDGSER.I	AKSPTPDGSER	2	11	146	23.624	148	11.015	0	0	36.2	Jurkat_TiO2_1mg_3_f09350	Jurkat	TiO2	3	f09350
sp|Q14690|RRP5_HUMAN	R.YSHVSQHS#PSK.K	R.YSHVSQHS#PSK.K	YSHVSQHSPSK	1	11	1360	5.085	0	0	0	0	165.7	Jurkat_TiO2_1mg_3_f09350	Jurkat	TiO2	3	f09350
sp|Q12906|ILF3_HUMAN	K.RPM*EEDGEEKS#PSKK.K	K.RPM*EEDGEEKS#PSKK.K	RPMEEDGEEKSPSKK	1	15	382	11.015	0	0	0	0	24.1	Jurkat_TiO2_1mg_3_f09350	Jurkat	TiO2	3	f09350
sp|P06748|NPM_HUMAN	K.DSKPSS#TPR.S	K.DSKPSS#TPR.S	DSKPSSTPR	1	9	218	0	0	0	0	0	484	Jurkat_TiO2_1mg_3_f09350	Jurkat	TiO2	3	f09350
sp|Q9NS37|ZHANG_HUMAN	K.S#PGGGGGGGSGNDNNQAATK.S	K.S#PGGGGGGGSGNDNNQAATK.S	SPGGGGGGGSGNDNNQAATK	1	20	189	34.892	0	0	0	0	16.1	Jurkat_TiO2_1mg_3_f09350	Jurkat	TiO2	3	f09350
sp|Q13185|CBX3_HUMAN	K.RKSLSDS#ESDDSK.S	K.RKS#LSDSESDDSK.S	RKSLSDSESDDSK	1	13	97	17.009	0	0	0	0	474.6	Jurkat_TiO2_1mg_3_f09350	Jurkat	TiO2	3	f09350
sp|Q12906|ILF3_HUMAN	K.RPM*EEDGEEKS#PSK.K	K.RPM*EEDGEEKS#PSK.K	RPMEEDGEEKSPSK	1	14	382	7.71	0	0	0	0	6390.3	Jurkat_TiO2_1mg_3_f09350	Jurkat	TiO2	3	f09350
sp|Q13185|CBX3_HUMAN	K.RKS#LSDSESDDSK.S	K.RKS#LSDSESDDSK.S	RKSLSDSESDDSK	1	13	93	11.015	0	0	0	0	1617.9	Jurkat_TiO2_1mg_3_f09350	Jurkat	TiO2	3	f09350
sp|Q14690|RRP5_HUMAN	R.YSHVSQHS#PSK.K	R.YSHVSQHS#PSK.K	YSHVSQHSPSK	1	11	1360	7.971	0	0	0	0	649.8	Jurkat_TiO2_1mg_3_f09350	Jurkat	TiO2	3	f09350
sp|Q12906|ILF3_HUMAN	K.RPM*EEDGEEKS#PSK.K	K.RPM*EEDGEEKS#PSK.K	RPMEEDGEEKSPSK	1	14	382	22.011	0	0	0	0	26231.7	Jurkat_TiO2_1mg_3_f09350	Jurkat	TiO2	3	f09350
sp|P51608|MECP2_HUMAN	K.KPKS#PKAPGTGR.G	K.KPKS#PKAPGTGR.G	KPKSPKAPGTGR	1	12	178	73.616	0	0	0	0	282.9	Jurkat_TiO2_1mg_3_f09350	Jurkat	TiO2	3	f09350
sp|Q12834|CDC20_HUMAN	R.SHS#AGRT#PGRTPGK.S	R.SHS#AGRTPGRT#PGK.S	SHSAGRTPGRTPGK	2	14	51	14.966	55	29.376	0	0	474.3	Jurkat_TiO2_1mg_3_f09350	Jurkat	TiO2	3	f09350
sp|Q9UQ35|SRRM2_HUMAN	R.YSHS#GSS#SPDTK.V	R.YSHS#GSSS#PDTK.V	YSHSGSSSPDTK	2	12	970	4.085	973	0	0	0	367.9	Jurkat_TiO2_1mg_3_f09350	Jurkat	TiO2	3	f09350
sp|Q8N655|CJ012_HUMAN	K.RTEGS#SPPDSK.N	K.RTEGS#SPPDSK.N	RTEGSSPPDSK	1	11	1095	0	0	0	0	0	189.8	Jurkat_TiO2_1mg_3_f09350	Jurkat	TiO2	3	f09350
sp|Q12834|CDC20_HUMAN	R.SHS#AGRTPGRT#PGK.S	R.SHS#AGRTPGRT#PGK.S	SHSAGRTPGRTPGK	2	14	51	11.015	59	4.085	0	0	45.3	Jurkat_TiO2_1mg_3_f09350	Jurkat	TiO2	3	f09350
sp|Q9BZZ5|API5_HUMAN	K.RASEDTTSGS#PPKK.S	K.RASEDT#TSGSPPKK.S	RASEDTTSGSPPKK	1	14	464	5.085	0	0	0	0	5467.5	Jurkat_TiO2_1mg_3_f09350	Jurkat	TiO2	3	f09350
sp|Q6ZU65|UBN2_HUMAN	K.NGS#EEDDDEKPGK.R	K.NGS#EEDDDEKPGK.R	NGSEEDDDEKPGK	1	13	584	1000	0	0	0	0	156.9	Jurkat_TiO2_1mg_3_f09350	Jurkat	TiO2	3	f09350
sp|Q9BZL6|KPCD2_HUMAN	R.KSS#TTLR.E	R.KSS#TTLR.E	KSSTTLR	1	7	396	6.591	0	0	0	0	510.7	Jurkat_TiO2_1mg_3_f09350	Jurkat	TiO2	3	f09350
sp|O75791|GRAP2_HUMAN	R.TREDQGHRGNS#LDR.R	R.TREDQGHRGNS#LDR.R	TREDQGHRGNSLDR	1	14	159	34.773	0	0	0	0	190.9	Jurkat_TiO2_1mg_3_f09350	Jurkat	TiO2	3	f09350
sp|Q8N3X1|FNBP4_HUMAN	R.ATS#PESTSR.S	R.ATS#PESTSR.S	ATSPESTSR	1	9	464	24.437	0	0	0	0	426.6	Jurkat_TiO2_1mg_3_f09350	Jurkat	TiO2	3	f09350
sp|P39687|AN32A_HUMAN		R.KREPEDEGEDDD.-	KREPEDEGEDDD	0	12	0	0	0	0	0	0	79.4	Jurkat_TiO2_1mg_3_f09350	Jurkat	TiO2	3	f09350
sp|Q92733|PRCC_HUMAN	R.KPS#DGSPDTKPSR.L	R.KPSDGS#PDTKPSR.L	KPSDGSPDTKPSR	1	13	209	24.243	0	0	0	0	264.7	Jurkat_TiO2_1mg_3_f09350	Jurkat	TiO2	3	f09350
sp|P51532|SMCA4_HUMAN	K.RKRDS#DAGS#STPTTSTR.S	K.RKRDS#DAGSSTPT#TSTR.S	RKRDSDAGSSTPTTSTR	2	17	1417	52.403	1421	4.085	0	0	666.6	Jurkat_TiO2_1mg_3_f09350	Jurkat	TiO2	3	f09350
sp|Q12872|SFSWA_HUMAN	K.ARSQS#VS#PSK.Q	K.ARSQS#VS#PSK.Q	ARSQSVSPSK	2	10	868	30.835	870	30.835	0	0	185.1	Jurkat_TiO2_1mg_3_f09350	Jurkat	TiO2	3	f09350
sp|Q9BZZ5|API5_HUMAN	K.RASEDTTSGS#PPKK.S	K.RASEDTTSGS#PPKK.S	RASEDTTSGSPPKK	1	14	464	11.015	0	0	0	0	897.4	Jurkat_TiO2_1mg_3_f09350	Jurkat	TiO2	3	f09350
sp|Q96B23|CR025_HUMAN	R.SRS#ESETSTM*AAK.K	R.SRS#ESETSTM*AAK.K	SRSESETSTMAAK	1	13	145	7.71	0	0	0	0	366.5	Jurkat_TiO2_1mg_3_f09350	Jurkat	TiO2	3	f09350
sp|P43243|MATR3_HUMAN	K.TESSTEGKEQEEKS#GEDGEK.D	K.TESSTEGKEQEEKS#GEDGEK.D	TESSTEGKEQEEKSGEDGEK	1	20	631	29.534	0	0	0	0	316.8	Jurkat_TiO2_1mg_3_f09350	Jurkat	TiO2	3	f09350
sp|Q6ZU65|UBN2_HUMAN	K.NGS#EEDDDEKPGK.R	K.NGS#EEDDDEKPGK.R	NGSEEDDDEKPGK	1	13	584	1000	0	0	0	0	50.5	Jurkat_TiO2_1mg_3_f09350	Jurkat	TiO2	3	f09350
sp|P51532|SMCA4_HUMAN	K.RKRDS#DAGS#STPTTSTR.S	K.RKRDS#DAGS#STPTTSTR.S	RKRDSDAGSSTPTTSTR	2	17	1417	15.381	1421	15.381	0	0	52.6	Jurkat_TiO2_1mg_3_f09350	Jurkat	TiO2	3	f09350
sp|P51532|SMCA4_HUMAN	K.RKRDS#DAGS#STPTTSTR.S	K.RKRDS#DAGSSTPTTST#R.S	RKRDSDAGSSTPTTSTR	2	17	1417	44.425	1421	4.085	0	0	666.6	Jurkat_TiO2_1mg_3_f09350	Jurkat	TiO2	3	f09350
sp|Q9NWB6|ARGL1_HUMAN	R.ASS#PPDR.I	R.ASS#PPDR.I	ASSPPDR	1	7	77	24.437	0	0	0	0	332.5	Jurkat_TiO2_1mg_3_f09350	Jurkat	TiO2	3	f09350
sp|Q7Z4V5|HDGR2_HUMAN	K.EHEEGRDS#EEGPR.C	K.EHEEGRDS#EEGPR.C	EHEEGRDSEEGPR	1	13	625	1000	0	0	0	0	566.5	Jurkat_TiO2_1mg_3_f09350	Jurkat	TiO2	3	f09350
sp|Q96ST2|IWS1_HUMAN	K.KFHS#S#DS#EEEEHKK.Q	K.KFHS#S#DS#EEEEHKK.Q	KFHSSDSEEEEHKK	3	14	362	1000	363	1000	365	1000	6353.3	Jurkat_TiO2_1mg_3_f09350	Jurkat	TiO2	3	f09350
sp|Q96ST2|IWS1_HUMAN	K.KFHS#S#DS#EEEEHKK.Q	K.KFHS#S#DS#EEEEHKK.Q	KFHSSDSEEEEHKK	3	14	362	1000	363	1000	365	1000	2449.8	Jurkat_TiO2_1mg_3_f09350	Jurkat	TiO2	3	f09350
sp|Q9NTI5|PDS5B_HUMAN	R.KKT#PVTEQEEK.L	R.KKT#PVTEQEEK.L	KKTPVTEQEEK	1	11	1220	71.753	0	0	0	0	228.2	Jurkat_TiO2_1mg_3_f09350	Jurkat	TiO2	3	f09350
sp|Q92733|PRCC_HUMAN	R.KPS#DGSPDTKPSR.L	R.KPS#DGSPDTKPSR.L	KPSDGSPDTKPSR	1	13	209	2.806	0	0	0	0	1055.6	Jurkat_TiO2_1mg_3_f09350	Jurkat	TiO2	3	f09350
sp|Q96ST2|IWS1_HUMAN	K.KFHS#S#DS#EEEEHKK.Q	K.KFHS#S#DS#EEEEHKK.Q	KFHSSDSEEEEHKK	3	14	362	1000	363	1000	365	1000	1184.4	Jurkat_TiO2_1mg_3_f09350	Jurkat	TiO2	3	f09350
sp|Q9NTI5|PDS5B_HUMAN	R.KKT#PVTEQEEK.L	R.KKT#PVTEQEEK.L	KKTPVTEQEEK	1	11	1220	37.54	0	0	0	0	98.5	Jurkat_TiO2_1mg_3_f09350	Jurkat	TiO2	3	f09350
sp|Q9H9J4|UBP42_HUMAN	K.RRHDS#VENSDSHVEK.K	K.RRHDS#VENSDSHVEK.K	RRHDSVENSDSHVEK	1	15	1166	27.121	0	0	0	0	832.3	Jurkat_TiO2_1mg_3_f09350	Jurkat	TiO2	3	f09350
sp|Q9H9J4|UBP42_HUMAN	K.RRHDS#VENSDSHVEK.K	K.RRHDS#VENSDSHVEK.K	RRHDSVENSDSHVEK	1	15	1166	47.045	0	0	0	0	264.7	Jurkat_TiO2_1mg_3_f09350	Jurkat	TiO2	3	f09350
sp|O43896|KIF1C_HUMAN	R.RNS#LDGGGR.S	R.RNS#LDGGGR.S	RNSLDGGGR	1	9	1033	1000	0	0	0	0	465.7	Jurkat_TiO2_1mg_3_f09350	Jurkat	TiO2	3	f09350
sp|Q9NWB6|ARGL1_HUMAN	R.AS#SPPDR.I	R.AS#SPPDR.I	ASSPPDR	1	7	76	24.437	0	0	0	0	332.5	Jurkat_TiO2_1mg_3_f09350	Jurkat	TiO2	3	f09350
sp|Q6NZ67|MZT2B_HUMAN	K.GGGPGKS#PTRGST.-	K.GGGPGKS#PTRGST.-	GGGPGKSPTRGST	1	13	152	4.988	0	0	0	0	643.3	Jurkat_TiO2_1mg_3_f09350	Jurkat	TiO2	3	f09350
sp|Q15061|WDR43_HUMAN	R.LQAKES#PQRK.K	R.LQAKES#PQRK.K	LQAKESPQRK	1	10	77	1000	0	0	0	0	2034.3	Jurkat_TiO2_1mg_3_f09350	Jurkat	TiO2	3	f09350
sp|Q12834|CDC20_HUMAN	R.SHS#AGRT#PGRT#PGK.S	R.SHS#AGRT#PGRT#PGK.S	SHSAGRTPGRTPGK	3	14	51	9.34	55	26.927	59	43.066	39.5	Jurkat_TiO2_1mg_3_f09350	Jurkat	TiO2	3	f09350
sp|P25205|MCM3_HUMAN	K.KRSEDES#ET#EDEEEK.S	K.KRSEDES#ET#EDEEEK.S	KRSEDESETEDEEEK	2	15	672	28.529	674	27.13	0	0	15503.1	Jurkat_TiO2_1mg_3_f09350	Jurkat	TiO2	3	f09350
sp|P25205|MCM3_HUMAN	K.KRSEDES#ET#EDEEEK.S	K.KRSEDES#ET#EDEEEK.S	KRSEDESETEDEEEK	2	15	672	28.529	674	35.356	0	0	15503.1	Jurkat_TiO2_1mg_3_f09350	Jurkat	TiO2	3	f09350
sp|Q6NZ67|MZT2B_HUMAN	K.GGGPGKSPT#RGST.-	K.GGGPGKSPT#RGST.-	GGGPGKSPTRGST	1	13	154	0	0	0	0	0	1591.7	Jurkat_TiO2_1mg_3_f09350	Jurkat	TiO2	3	f09350
sp|P48651|PTSS1_HUMAN	K.GSEDS#PPKHAGNNESHSSR.R	K.GSEDS#PPKHAGNNESHSSR.R	GSEDSPPKHAGNNESHSSR	1	19	442	3.696	0	0	0	0	20.4	Jurkat_TiO2_1mg_3_f09350	Jurkat	TiO2	3	f09350
sp|P42167|LAP2B_HUMAN	K.LREQGTES#R.S	K.LREQGTES#R.S	LREQGTESR	1	9	156	11.015	0	0	0	0	1699.9	Jurkat_TiO2_1mg_3_f09350	Jurkat	TiO2	3	f09350
sp|Q9UQ35|SRRM2_HUMAN	K.PAS#PKKPPPGERR.S	K.PAS#PKKPPPGERR.S	PASPKKPPPGERR	1	13	2664	1000	0	0	0	0	756.4	Jurkat_TiO2_1mg_3_f09350	Jurkat	TiO2	3	f09350
sp|Q9ULU4|PKCB1_HUMAN	K.DKAS#PEPEK.D	K.DKAS#PEPEK.D	DKASPEPEK	1	9	668	1000	0	0	0	0	2766.6	Jurkat_TiO2_1mg_3_f09350	Jurkat	TiO2	3	f09350
sp|P06400|RB_HUMAN	K.MNDS#M*DTSNKEEK.-	K.MNDS#M*DTSNKEEK.-	MNDSMDTSNKEEK	1	13	919	20.167	0	0	0	0	21.7	Jurkat_TiO2_1mg_3_f09350	Jurkat	TiO2	3	f09350
sp|Q9Y4D8|HECD4_HUMAN	K.KPTVKPKS#PEK.S	K.KPTVKPKS#PEK.S	KPTVKPKSPEK	1	11	3381	15.381	0	0	0	0	709.7	Jurkat_TiO2_1mg_3_f09350	Jurkat	TiO2	3	f09350
sp|Q9Y4D8|HECD4_HUMAN	K.SKPDEKDPEKS#PTK.K	K.SKPDEKDPEKS#PTK.K	SKPDEKDPEKSPTK	1	14	3395	4.54	0	0	0	0	434.7	Jurkat_TiO2_1mg_3_f09350	Jurkat	TiO2	3	f09350
sp|Q9BRD0|BUD13_HUMAN	R.HDT#PDSS#PR.R	R.HDT#PDSS#PR.R	HDTPDSSPR	2	9	123	24.243	127	0	0	0	124.6	Jurkat_TiO2_1mg_3_f09350	Jurkat	TiO2	3	f09350
sp|Q9HC52|CBX8_HUMAN	R.VDDKPSS#PGDSSKK.R	R.VDDKPSS#PGDSSKK.R	VDDKPSSPGDSSKK	1	14	191	9.34	0	0	0	0	38.7	Jurkat_TiO2_1mg_3_f09350	Jurkat	TiO2	3	f09350
sp|Q8WUA4|TF3C2_HUMAN	K.VSS#PTKPK.K	K.VSS#PTKPK.K	VSSPTKPK	1	8	220	17.009	0	0	0	0	1502.4	Jurkat_TiO2_1mg_3_f09350	Jurkat	TiO2	3	f09350
sp|Q9Y4D8|HECD4_HUMAN	K.SKPDEKDPEKS#PTK.K	K.SKPDEKDPEKS#PTK.K	SKPDEKDPEKSPTK	1	14	3395	6.591	0	0	0	0	37.2	Jurkat_TiO2_1mg_3_f09350	Jurkat	TiO2	3	f09350
sp|Q96EA4|SPDLY_HUMAN	R.SGNTPNS#PR.L	R.SGNTPNS#PR.L	SGNTPNSPR	1	9	555	37.54	0	0	0	0	181.4	Jurkat_TiO2_1mg_3_f09350	Jurkat	TiO2	3	f09350
sp|Q3B820|F161A_HUMAN	K.EKDEANEES#EEEK.S	K.EKDEANEES#EEEK.S	EKDEANEESEEEK	1	13	650	1000	0	0	0	0	42.5	Jurkat_TiO2_1mg_3_f09350	Jurkat	TiO2	3	f09350
sp|Q9UQ35|SRRM2_HUMAN	R.S#RT#RS#PVR.R	R.S#RT#RS#PVR.R	SRTRSPVR	3	8	625	1000	627	1000	629	1000	3904.9	Jurkat_TiO2_1mg_3_f09350	Jurkat	TiO2	3	f09350
sp|Q13427|PPIG_HUMAN	R.NVS#ES#PNRK.N	R.NVS#ES#PNRK.N	NVSESPNRK	2	9	413	1000	415	1000	0	0	6021.6	Jurkat_TiO2_1mg_3_f09350	Jurkat	TiO2	3	f09350
sp|Q9UBW5|BIN2_HUMAN	R.TRTAS#EGSEQPK.K	R.TRTAS#EGSEQPK.K	TRTASEGSEQPK	1	12	395	13.38	0	0	0	0	31.7	Jurkat_TiO2_1mg_3_f09350	Jurkat	TiO2	3	f09350
sp|Q5T200|ZC3HD_HUMAN	R.LRS#PSNDSAHR.S	R.LRS#PSNDSAHR.S	LRSPSNDSAHR	1	11	1208	11.015	0	0	0	0	1698.1	Jurkat_TiO2_1mg_3_f09350	Jurkat	TiO2	3	f09350
sp|Q92610|ZN592_HUMAN	K.SPKSPRS#PLEATR.K	K.SPKSPRS#PLEATR.K	SPKSPRSPLEATR	1	13	334	1.488	0	0	0	0	6.6556	Jurkat_TiO2_1mg_3_f09350	Jurkat	TiO2	3	f09350
sp|Q9BYW2|SETD2_HUMAN	R.RT#S#SHSSSYR.D	R.RTSSHS#SS#YR.D	RTSSHSSSYR	2	10	473	15.381	474	4.691	0	0	7.555	Jurkat_TiO2_1mg_3_f09350	Jurkat	TiO2	3	f09350
sp|Q9UQ35|SRRM2_HUMAN	R.SRAS#PVSR.R	R.SRAS#PVSR.R	SRASPVSR	1	8	1916	24.243	0	0	0	0	2846.1	Jurkat_TiO2_1mg_3_f09350	Jurkat	TiO2	3	f09350
sp|P27797|CALR_HUMAN		K.RKEEEEAEDKEDDEDK.D	RKEEEEAEDKEDDEDK	0	16	0	0	0	0	0	0	1269.7	Jurkat_TiO2_1mg_3_f09350	Jurkat	TiO2	3	f09350
sp|Q9H9J4|UBP42_HUMAN	K.RRHDS#VENS#DSHVEK.K	K.RRHDS#VENS#DSHVEK.K	RRHDSVENSDSHVEK	2	15	1166	26.105	1170	11.015	0	0	246.5	Jurkat_TiO2_1mg_3_f09350	Jurkat	TiO2	3	f09350
sp|Q05D32|CTSL2_HUMAN	K.GST#PKEERENPSK.R	K.GST#PKEERENPSK.R	GSTPKEERENPSK	1	13	60	0	0	0	0	0	140.4	Jurkat_TiO2_1mg_3_f09350	Jurkat	TiO2	3	f09350
sp|P27797|CALR_HUMAN		K.RKEEEEAEDKEDDEDK.D	RKEEEEAEDKEDDEDK	0	16	0	0	0	0	0	0	93.6	Jurkat_TiO2_1mg_3_f09350	Jurkat	TiO2	3	f09350
sp|Q9C0K0|BC11B_HUMAN	K.IEQAERS#.-	K.IEQAERS#.-	IEQAERS	1	7	894	1000	0	0	0	0	391.8	Jurkat_TiO2_1mg_3_f09350	Jurkat	TiO2	3	f09350
sp|O75494|SRS10_HUMAN	R.SRS#HS#DNDRFK.H	R.SRS#HS#DNDRFK.H	SRSHSDNDRFK	2	11	158	7.71	160	22.011	0	0	313.5	Jurkat_TiO2_1mg_3_f09350	Jurkat	TiO2	3	f09350
sp|Q9UQ35|SRRM2_HUMAN	R.MGRS#RS#PATAK.R	R.MGRS#RS#PATAK.R	MGRSRSPATAK	2	11	484	38.189	486	37.54	0	0	21566.9	Jurkat_TiO2_1mg_3_f09350	Jurkat	TiO2	3	f09350
sp|Q8IZP0|ABI1_HUMAN	R.LGSQHS#PGR.T	R.LGSQHS#PGR.T	LGSQHSPGR	1	9	225	13.38	0	0	0	0	2871.4	Jurkat_TiO2_1mg_3_f09350	Jurkat	TiO2	3	f09350
sp|O75475|PSIP1_HUMAN	K.ETSVSKEDT#DHEEK.A	K.ETSVSKEDT#DHEEK.A	ETSVSKEDTDHEEK	1	14	122	11.015	0	0	0	0	1193.8	Jurkat_TiO2_1mg_3_f09350	Jurkat	TiO2	3	f09350
sp|O75475|PSIP1_HUMAN	K.ETSVSKEDT#DHEEK.A	K.ETSVSKEDT#DHEEK.A	ETSVSKEDTDHEEK	1	14	122	27.121	0	0	0	0	328.5	Jurkat_TiO2_1mg_3_f09350	Jurkat	TiO2	3	f09350
sp|Q13428|TCOF_HUMAN	K.ASSVSTKES#PARK.A	K.ASSVSTKES#PARK.A	ASSVSTKESPARK	1	13	233	15.007	0	0	0	0	7581.6	Jurkat_TiO2_1mg_3_f09350	Jurkat	TiO2	3	f09350
sp|Q13428|TCOF_HUMAN	K.ASSVSTKES#PARK.A	K.ASSVSTKES#PARK.A	ASSVSTKESPARK	1	13	233	13.38	0	0	0	0	1651.7	Jurkat_TiO2_1mg_3_f09350	Jurkat	TiO2	3	f09350
sp|Q9HCG8|CWC22_HUMAN	R.RGRSY#DSS#M*ESR.N	R.RGRSY#DSS#M*ESR.N	RGRSYDSSMESR	2	12	62	0	65	0	0	0	34.5	Jurkat_TiO2_1mg_3_f09350	Jurkat	TiO2	3	f09350
sp|Q9UN37|VPS4A_HUMAN	K.ENQSEGKGSDS#DSEGDNPEKK.K	K.ENQSEGKGSDS#DSEGDNPEKK.K	ENQSEGKGSDSDSEGDNPEKK	1	21	97	20.167	0	0	0	0	242.5	Jurkat_TiO2_1mg_3_f09350	Jurkat	TiO2	3	f09350
sp|Q15424|SAFB1_HUMAN	K.M*SS#PEDDSDTK.R	K.M*SS#PEDDSDTK.R	MSSPEDDSDTK	1	11	384	24.437	0	0	0	0	74.3	Jurkat_TiO2_1mg_3_f09350	Jurkat	TiO2	3	f09350
sp|Q5T200|ZC3HD_HUMAN	K.RSSS#LGS#NR.S	K.RSSS#LGS#NR.S	RSSSLGSNR	2	9	1191	24.437	1194	44.278	0	0	189.7	Jurkat_TiO2_1mg_3_f09350	Jurkat	TiO2	3	f09350
sp|Q9UQ35|SRRM2_HUMAN	R.YSHS#GS#SS#PDTK.V	R.YSHS#GS#S#SPDTK.V	YSHSGSSSPDTK	3	12	970	0	972	0	974	0	18.8	Jurkat_TiO2_1mg_3_f09350	Jurkat	TiO2	3	f09350
sp|O95626|AN32D_HUMAN	R.NRT#PSDVK.E	R.NRT#PSDVK.E	NRTPSDVK	1	8	15	17.009	0	0	0	0	1787.1	Jurkat_TiO2_1mg_3_f09350	Jurkat	TiO2	3	f09350
sp|Q9NYP9|MS18A_HUMAN	K.RLS#EDSSR.H	K.RLS#EDSSR.H	RLSEDSSR	1	8	36	20.167	0	0	0	0	267.4	Jurkat_TiO2_1mg_3_f09350	Jurkat	TiO2	3	f09350
sp|Q96ST2|IWS1_HUMAN	K.FHSS#DS#EEEEHKK.Q	K.FHSS#DS#EEEEHKK.Q	FHSSDSEEEEHKK	2	13	363	24.437	365	53.534	0	0	792.8	Jurkat_TiO2_1mg_3_f09350	Jurkat	TiO2	3	f09350
sp|Q96ST2|IWS1_HUMAN	K.FHSS#DS#EEEEHKK.Q	K.FHSS#DS#EEEEHKK.Q	FHSSDSEEEEHKK	2	13	363	0	365	2.806	0	0	3740.8	Jurkat_TiO2_1mg_3_f09350	Jurkat	TiO2	3	f09350
sp|Q8IWI9|MGAP_HUMAN	R.KHS#PDLR.V	R.KHS#PDLR.V	KHSPDLR	1	7	534	1000	0	0	0	0	406.1	Jurkat_TiO2_1mg_3_f09350	Jurkat	TiO2	3	f09350
sp|P78559|MAP1A_HUMAN	K.DGHS#PMSK.G	K.DGHS#PMSK.G	DGHSPMSK	1	8	2664	24.243	0	0	0	0	145.3	Jurkat_TiO2_1mg_3_f09350	Jurkat	TiO2	3	f09350
sp|Q96MU7|YTDC1_HUMAN	R.AKS#PTPDGSER.I	R.AKS#PTPDGSER.I	AKSPTPDGSER	1	11	146	48.874	0	0	0	0	225.3	Jurkat_TiO2_1mg_3_f09350	Jurkat	TiO2	3	f09350
sp|Q6RFH5|WDR74_HUMAN	K.KRPGS#TS#P.-	K.KRPGS#TS#P.-	KRPGSTSP	2	8	382	9.34	384	24.437	0	0	2847.9	Jurkat_TiO2_1mg_3_f09350	Jurkat	TiO2	3	f09350
sp|P55199|ELL_HUMAN	R.SAS#PPQK.R	R.SAS#PPQK.R	SASPPQK	1	7	319	36.655	0	0	0	0	757.6	Jurkat_TiO2_1mg_3_f09350	Jurkat	TiO2	3	f09350
sp|Q9BY12|SCAPE_HUMAN	K.HFDKS#PTK.T	K.HFDKS#PTK.T	HFDKSPTK	1	8	86	6.591	0	0	0	0	1972.2	Jurkat_TiO2_1mg_3_f09350	Jurkat	TiO2	3	f09350
sp|P23588|IF4B_HUMAN	R.ERSRT#GS#ESSQTGTSTTSSR.N	R.ERSRT#GS#ESSQTGTSTTSSR.N	ERSRTGSESSQTGTSTTSSR	2	20	420	12.092	422	20.167	0	0	49.2	Jurkat_TiO2_1mg_3_f09350	Jurkat	TiO2	3	f09350
sp|P57081|WDR4_HUMAN	R.RRS#PPPGPDGHAK.K	R.RRS#PPPGPDGHAK.K	RRSPPPGPDGHAK	1	13	391	1000	0	0	0	0	240.5	Jurkat_TiO2_1mg_3_f09350	Jurkat	TiO2	3	f09350
sp|P49792|RBP2_HUMAN	K.HSTPS#PTR.Y	K.HSTPS#PTR.Y	HSTPSPTR	1	8	781	6.591	0	0	0	0	989.8	Jurkat_TiO2_1mg_3_f09350	Jurkat	TiO2	3	f09350
sp|Q9Y2W1|TR150_HUMAN	K.HGLAHDEM*KS#PR.E	K.HGLAHDEM*KS#PR.E	HGLAHDEMKSPR	1	12	698	1000	0	0	0	0	184.9	Jurkat_TiO2_1mg_3_f09350	Jurkat	TiO2	3	f09350
sp|Q99700|ATX2_HUMAN	R.LQDQRQNS#PAGNK.E	R.LQDQRQNS#PAGNK.E	LQDQRQNSPAGNK	1	13	758	1000	0	0	0	0	96.5	Jurkat_TiO2_1mg_3_f09350	Jurkat	TiO2	3	f09350
sp|Q8N1F7|NUP93_HUMAN	K.GTS#PSSSSRPQR.V	K.GTS#PSSSSRPQR.V	GTSPSSSSRPQR	1	12	767	19.843	0	0	0	0	2213.9	Jurkat_TiO2_1mg_3_f09350	Jurkat	TiO2	3	f09350
sp|Q969F2|NKD2_HUMAN	R.SRS#QEPDTHAVHHR.R	R.SRS#QEPDTHAVHHR.R	SRSQEPDTHAVHHR	1	14	286	5.75	0	0	0	0	21.4	Jurkat_TiO2_1mg_3_f09350	Jurkat	TiO2	3	f09350
sp|Q8TAP9|MPLKI_HUMAN	R.SRPYGSSHS#PR.H	R.SRPYGSSHS#PR.H	SRPYGSSHSPR	1	11	66	11.015	0	0	0	0	412.9	Jurkat_TiO2_1mg_3_f09350	Jurkat	TiO2	3	f09350
sp|A2AJT9|CX023_HUMAN	K.VQGGHS#PDDHRVR.G	K.VQGGHS#PDDHRVR.G	VQGGHSPDDHRVR	1	13	139	1000	0	0	0	0	228.2	Jurkat_TiO2_1mg_3_f09350	Jurkat	TiO2	3	f09350
sp|Q5W0B1|RN219_HUMAN	K.AEVDNRS#PQK.F	K.AEVDNRS#PQK.F	AEVDNRSPQK	1	10	210	1000	0	0	0	0	1540.6	Jurkat_TiO2_1mg_3_f09350	Jurkat	TiO2	3	f09350
sp|Q5UIP0|RIF1_HUMAN	R.SHSSNSS#PIGK.S	R.SHSSNSS#PIGK.S	SHSSNSSPIGK	1	11	2234	0	0	0	0	0	579	Jurkat_TiO2_1mg_3_f09350	Jurkat	TiO2	3	f09350
sp|A2AJT9|CX023_HUMAN	K.VQGGHS#PDDHRVR.G	K.VQGGHS#PDDHRVR.G	VQGGHSPDDHRVR	1	13	139	1000	0	0	0	0	254.7	Jurkat_TiO2_1mg_3_f09350	Jurkat	TiO2	3	f09350
sp|Q99700|ATX2_HUMAN	R.LQDQRQNS#PAGNK.E	R.LQDQRQNS#PAGNK.E	LQDQRQNSPAGNK	1	13	758	1000	0	0	0	0	215.6	Jurkat_TiO2_1mg_3_f09350	Jurkat	TiO2	3	f09350
sp|P55199|ELL_HUMAN	R.GRS#AS#PPQK.R	R.GRS#AS#PPQK.R	GRSASPPQK	2	9	317	1000	319	1000	0	0	590.4	Jurkat_TiO2_1mg_3_f09350	Jurkat	TiO2	3	f09350
sp|Q96FS4|SIPA1_HUMAN	R.ARAHS#HEEASRPAATSTR.L	R.ARAHS#HEEASRPAATSTR.L	ARAHSHEEASRPAATSTR	1	18	74	4.691	0	0	0	0	92.2	Jurkat_TiO2_1mg_3_f09350	Jurkat	TiO2	3	f09350
sp|Q9UQ35|SRRM2_HUMAN	R.RGGS#GYHSRS#PARQESSR.T	R.RGGS#GYHS#RSPARQESSR.T	RGGSGYHSRSPARQESSR	2	18	1818	4.085	1824	4.085	0	0	218.2	Jurkat_TiO2_1mg_3_f09350	Jurkat	TiO2	3	f09350
sp|P42694|HELZ_HUMAN	K.QQQS#PPK.G	K.QQQS#PPK.G	QQQSPPK	1	7	1126	1000	0	0	0	0	156.7	Jurkat_TiO2_1mg_3_f09350	Jurkat	TiO2	3	f09350
sp|Q99501|GA2L1_HUMAN	R.ARS#PAAPR.L	R.ARS#PAAPR.L	ARSPAAPR	1	8	479	1000	0	0	0	0	352.5	Jurkat_TiO2_1mg_3_f09350	Jurkat	TiO2	3	f09350
sp|Q13131|AAPK1_HUMAN	K.S#GTATPQR.S	K.S#GTATPQR.S	SGTATPQR	1	8	486	6.591	0	0	0	0	115.6	Jurkat_TiO2_1mg_3_f09350	Jurkat	TiO2	3	f09350
sp|Q15435|PP1R7_HUMAN	R.RVESEES#GDEEGK.K	R.RVESEES#GDEEGK.K	RVESEESGDEEGK	1	13	27	24.243	0	0	0	0	156.1	Jurkat_TiO2_1mg_3_f09350	Jurkat	TiO2	3	f09350
sp|Q9P2E9|RRBP1_HUMAN	K.KVDTT#PNQGK.K	K.KVDTT#PNQGK.K	KVDTTPNQGK	1	10	275	24.437	0	0	0	0	248	Jurkat_TiO2_1mg_3_f09350	Jurkat	TiO2	3	f09350
sp|Q96JP5|ZFP91_HUMAN	K.SPS#PVQGKK.S	K.SPS#PVQGKK.S	SPSPVQGKK	1	9	103	19.843	0	0	0	0	771.7	Jurkat_TiO2_1mg_3_f09350	Jurkat	TiO2	3	f09350
sp|Q13131|AAPK1_HUMAN	K.S#GTATPQR.S	K.S#GTATPQR.S	SGTATPQR	1	8	486	17.009	0	0	0	0	115.6	Jurkat_TiO2_1mg_3_f09350	Jurkat	TiO2	3	f09350
sp|P07910|HNRPC_HUMAN	K.NDKS#EEEQSSSSVK.K	K.NDKS#EEEQSSSSVK.K	NDKSEEEQSSSSVK	1	14	233	65.44	0	0	0	0	9048.4	Jurkat_TiO2_1mg_3_f09350	Jurkat	TiO2	3	f09350
sp|Q15435|PP1R7_HUMAN	R.RVESEES#GDEEGK.K	R.RVESEES#GDEEGK.K	RVESEESGDEEGK	1	13	27	71.753	0	0	0	0	55.8	Jurkat_TiO2_1mg_3_f09350	Jurkat	TiO2	3	f09350
sp|P33527|MRP1_HUMAN	R.HHNS#TAELQK.A	R.HHNS#TAELQK.A	HHNSTAELQK	1	10	930	24.437	0	0	0	0	1487.9	Jurkat_TiO2_1mg_3_f09350	Jurkat	TiO2	3	f09350
sp|P78559|MAP1A_HUMAN	R.GKRS#PT#PGKGPADR.A	R.GKRS#PT#PGKGPADR.A	GKRSPTPGKGPADR	2	14	2629	1000	2631	1000	0	0	3711.4	Jurkat_TiO2_1mg_3_f09350	Jurkat	TiO2	3	f09350
sp|P23588|IF4B_HUMAN	R.SRTGS#ESSQTGTSTTSSR.N	R.SRTGS#ESSQTGTSTTSSR.N	SRTGSESSQTGTSTTSSR	1	18	422	0	0	0	0	0	2695.1	Jurkat_TiO2_1mg_3_f09350	Jurkat	TiO2	3	f09350
sp|Q8NFJ5|RAI3_HUMAN		K.DYEVKK.E	DYEVKK	0	6	0	0	0	0	0	0	185.3	Jurkat_TiO2_1mg_3_f09350	Jurkat	TiO2	3	f09350
sp|Q9UQ35|SRRM2_HUMAN	R.SRTS#PVSR.R	R.SRTS#PVSR.R	SRTSPVSR	1	8	1893	24.437	0	0	0	0	1177.7	Jurkat_TiO2_1mg_3_f09350	Jurkat	TiO2	3	f09350
sp|Q9UKV3|ACINU_HUMAN	R.LQPERGS#PKK.C	R.LQPERGS#PKK.C	LQPERGSPKK	1	10	729	1000	0	0	0	0	3269.5	Jurkat_TiO2_1mg_3_f09350	Jurkat	TiO2	3	f09350
sp|Q9GZR2|REXO4_HUMAN	K.KETS#PQVK.G	K.KETS#PQVK.G	KETSPQVK	1	8	111	24.437	0	0	0	0	622.6	Jurkat_TiO2_1mg_3_f09350	Jurkat	TiO2	3	f09350
sp|Q9H307|PININ_HUMAN	R.SIS#ESS#RSGK.R	R.S#ISESS#RSGK.R	SISESSRSGK	2	10	692	19.843	695	9.34	0	0	239.4	Jurkat_TiO2_1mg_3_f09350	Jurkat	TiO2	3	f09350
sp|Q8IY63|AMOL1_HUMAN	K.LENS#PGHGKS#PDHR.G	K.LENS#PGHGKS#PDHR.G	LENSPGHGKSPDHR	2	14	924	1000	930	1000	0	0	300.7	Jurkat_TiO2_1mg_3_f09350	Jurkat	TiO2	3	f09350
sp|Q13185|CBX3_HUMAN	K.RKS#LS#DSESDDSK.S	K.RKS#LS#DSESDDSK.S	RKSLSDSESDDSK	2	13	93	27.121	95	31.275	0	0	10334.3	Jurkat_TiO2_1mg_3_f09350	Jurkat	TiO2	3	f09350
sp|Q13315|ATM_HUMAN	R.DPET#IK.H	R.DPET#IK.H	DPETIK	1	6	39	1000	0	0	0	0	922.7	Jurkat_TiO2_1mg_3_f09350	Jurkat	TiO2	3	f09350
sp|Q9UKJ3|GPTC8_HUMAN	K.RSHDSDDS#DY#ASSK.H	K.RSHDSDDS#DY#ASSK.H	RSHDSDDSDYASSK	2	14	914	24.243	916	26.927	0	0	91	Jurkat_TiO2_1mg_3_f09350	Jurkat	TiO2	3	f09350
sp|Q13185|CBX3_HUMAN	K.RKS#LS#DSESDDSK.S	K.RKS#LS#DSESDDSK.S	RKSLSDSESDDSK	2	13	93	44.278	95	17.009	0	0	7216.7	Jurkat_TiO2_1mg_3_f09350	Jurkat	TiO2	3	f09350
sp|Q96BR1|SGK3_HUMAN	K.HQS#DPS#EDEDERSSQK.L	K.HQS#DPS#EDEDERSSQK.L	HQSDPSEDEDERSSQK	2	16	126	46.016	129	18.805	0	0	102.3	Jurkat_TiO2_1mg_3_f09350	Jurkat	TiO2	3	f09350
sp|Q6PD62|CTR9_HUMAN	R.RHPKGEEGS#DDDETENGPK.P	R.RHPKGEEGS#DDDETENGPK.P	RHPKGEEGSDDDETENGPK	1	19	970	22.492	0	0	0	0	67.1	Jurkat_TiO2_1mg_3_f09350	Jurkat	TiO2	3	f09350
sp|Q96BR1|SGK3_HUMAN	K.HQS#DPS#EDEDERSSQK.L	K.HQS#DPS#EDEDERSSQK.L	HQSDPSEDEDERSSQK	2	16	126	83.499	129	65.246	0	0	243.6	Jurkat_TiO2_1mg_3_f09350	Jurkat	TiO2	3	f09350
sp|Q8IYB3|SRRM1_HUMAN	K.RRSPS#LSSK.H	K.RRSPS#LSSK.H	RRSPSLSSK	1	9	655	6.591	0	0	0	0	4438	Jurkat_TiO2_1mg_3_f09350	Jurkat	TiO2	3	f09350
sp|O43776|SYNC_HUMAN	K.KEAEDS#LRREK.N	K.KEAEDS#LRREK.N	KEAEDSLRREK	1	11	88	1000	0	0	0	0	147.7	Jurkat_TiO2_1mg_3_f09350	Jurkat	TiO2	3	f09350
sp|P07910|HNRPC_HUMAN	K.NDKS#EEEQSSSSVK.K	K.NDKS#EEEQSSSSVK.K	NDKSEEEQSSSSVK	1	14	233	75.738	0	0	0	0	4792.5	Jurkat_TiO2_1mg_3_f09350	Jurkat	TiO2	3	f09350
sp|Q6PD62|CTR9_HUMAN	R.RHPKGEEGS#DDDETENGPK.P	R.RHPKGEEGS#DDDETENGPK.P	RHPKGEEGSDDDETENGPK	1	19	970	15.381	0	0	0	0	67.1	Jurkat_TiO2_1mg_3_f09350	Jurkat	TiO2	3	f09350
sp|Q8IYB3|SRRM1_HUMAN	R.RVS#HS#PPPK.Q	R.RVS#HS#PPPK.Q	RVSHSPPPK	2	9	636	1000	638	1000	0	0	307.3	Jurkat_TiO2_1mg_3_f09350	Jurkat	TiO2	3	f09350
sp|Q5T200|ZC3HD_HUMAN	K.RNTEESS#S#PVRK.E	K.RNTEESS#S#PVRK.E	RNTEESSSPVRK	2	12	109	9.34	110	17.009	0	0	107.6	Jurkat_TiO2_1mg_3_f09350	Jurkat	TiO2	3	f09350
sp|Q9Y3E1|HDGR3_HUMAN	K.DCKEEENKS#SSEGGDAGNDTR.N	K.DCKEEENKSS#SEGGDAGNDTR.N	DCKEEENKSSSEGGDAGNDTR	1	21	178	4.085	0	0	0	0	41.4	Jurkat_TiO2_1mg_3_f09350	Jurkat	TiO2	3	f09350
sp|O60583|CCNT2_HUMAN	K.HSS#PHISR.D	K.HSS#PHISR.D	HSSPHISR	1	8	549	24.437	0	0	0	0	179.4	Jurkat_TiO2_1mg_3_f09350	Jurkat	TiO2	3	f09350
sp|Q12906|ILF3_HUMAN	K.RPMEEDGEEKS#PSKK.K	K.RPMEEDGEEKSPS#KK.K	RPMEEDGEEKSPSKK	1	15	382	20.167	0	0	0	0	13604.2	Jurkat_TiO2_1mg_3_f09350	Jurkat	TiO2	3	f09350
sp|Q15435|PP1R7_HUMAN	R.RVES#EES#GDEEGKK.H	R.RVES#EES#GDEEGKK.H	RVESEESGDEEGKK	2	14	24	1000	27	1000	0	0	1972.4	Jurkat_TiO2_1mg_3_f09350	Jurkat	TiO2	3	f09350
sp|Q12906|ILF3_HUMAN	K.RPMEEDGEEKS#PSKK.K	K.RPMEEDGEEKS#PSKK.K	RPMEEDGEEKSPSKK	1	15	382	4.085	0	0	0	0	7703.6	Jurkat_TiO2_1mg_3_f09350	Jurkat	TiO2	3	f09350
sp|O76021|RL1D1_HUMAN	K.HATGKKS#PAKS#PNPS#TPR.G	K.HATGKKS#PAKS#PNPS#TPR.G	HATGKKSPAKSPNPSTPR	3	18	392	6.91	396	9.911	400	0	406	Jurkat_TiO2_1mg_3_f09350	Jurkat	TiO2	3	f09350
sp|Q12906|ILF3_HUMAN	K.RPMEEDGEEKSPS#KK.K	K.RPMEEDGEEKSPS#KK.K	RPMEEDGEEKSPSKK	1	15	384	17.009	0	0	0	0	2288.8	Jurkat_TiO2_1mg_3_f09350	Jurkat	TiO2	3	f09350
sp|P49815|TSC2_HUMAN	R.SM*S#GGHGLR.V	R.SM*S#GGHGLR.V	SMSGGHGLR	1	9	1132	19.843	0	0	0	0	192.9	Jurkat_TiO2_1mg_3_f09350	Jurkat	TiO2	3	f09350
sp|Q8WX93|PALLD_HUMAN	R.GRS#PRSPSGHPHVR.R	R.GRS#PRSPSGHPHVR.R	GRSPRSPSGHPHVR	1	14	1101	2.806	0	0	0	0	853.2	Jurkat_TiO2_1mg_3_f09350	Jurkat	TiO2	3	f09350
sp|Q14677|EPN4_HUMAN	K.DREDS#PERCSDSDEEKK.A	K.DREDS#PERCSDSDEEKK.A	DREDSPERCSDSDEEKK	1	17	227	4.691	0	0	0	0	391.9	Jurkat_TiO2_1mg_3_f09350	Jurkat	TiO2	3	f09350
sp|Q12906|ILF3_HUMAN	K.RPM*EEDGEEKS#PSK.K	K.RPM*EEDGEEKS#PSK.K	RPMEEDGEEKSPSK	1	14	382	7.71	0	0	0	0	6025.2	Jurkat_TiO2_1mg_3_f09350	Jurkat	TiO2	3	f09350
sp|O00257|CBX4_HUMAN	K.SGEVAEGEARS#PSHKK.R	K.SGEVAEGEARS#PSHKK.R	SGEVAEGEARSPSHKK	1	16	291	17.009	0	0	0	0	101.1	Jurkat_TiO2_1mg_3_f09350	Jurkat	TiO2	3	f09350
sp|O00257|CBX4_HUMAN	K.SGEVAEGEARS#PSHKK.R	K.SGEVAEGEARS#PSHKK.R	SGEVAEGEARSPSHKK	1	16	291	4.085	0	0	0	0	549.7	Jurkat_TiO2_1mg_3_f09350	Jurkat	TiO2	3	f09350
sp|P16104|H2AX_HUMAN	K.KT#SATVGPK.A	K.KT#SATVGPK.A	KTSATVGPK	1	9	121	24.437	0	0	0	0	1521	Jurkat_TiO2_1mg_3_f09350	Jurkat	TiO2	3	f09350
sp|Q12906|ILF3_HUMAN	K.RPM*EEDGEEKS#PSK.K	K.RPM*EEDGEEKS#PSK.K	RPMEEDGEEKSPSK	1	14	382	12.092	0	0	0	0	26205.7	Jurkat_TiO2_1mg_3_f09350	Jurkat	TiO2	3	f09350
sp|Q9BRD0|BUD13_HUMAN	R.HDS#DTS#PPRR.I	R.HDS#DTS#PPRR.I	HDSDTSPPRR	2	10	172	30.835	175	0	0	0	4124.4	Jurkat_TiO2_1mg_3_f09350	Jurkat	TiO2	3	f09350
sp|Q6P1L5|F117B_HUMAN	R.STS#PTRGGGNAAAR.T	R.STS#PTRGGGNAAAR.T	STSPTRGGGNAAAR	1	14	93	11.015	0	0	0	0	708.4	Jurkat_TiO2_1mg_3_f09350	Jurkat	TiO2	3	f09350
sp|Q9NTI5|PDS5B_HUMAN	R.GRPSKT#PS#PSQPKK.N	R.GRPSKT#PS#PSQPKK.N	GRPSKTPSPSQPKK	2	14	1381	4.085	1383	11.015	0	0	2088.6	Jurkat_TiO2_1mg_3_f09350	Jurkat	TiO2	3	f09350
sp|Q9NTI5|PDS5B_HUMAN	R.GRPSKT#PS#PSQPKK.N	R.GRPSKT#PS#PSQPKK.N	GRPSKTPSPSQPKK	2	14	1381	31.275	1383	30.835	0	0	446.4	Jurkat_TiO2_1mg_3_f09350	Jurkat	TiO2	3	f09350
sp|P11717|MPRI_HUMAN	R.RSS#NVSYK.Y	R.RSS#NVSYK.Y	RSSNVSYK	1	8	2347	24.437	0	0	0	0	316.3	Jurkat_TiO2_1mg_3_f09350	Jurkat	TiO2	3	f09350
sp|Q8IYB3|SRRM1_HUMAN	R.VSHS#PPPK.Q	R.VSHS#PPPK.Q	VSHSPPPK	1	8	638	48.874	0	0	0	0	1072.8	Jurkat_TiO2_1mg_3_f09350	Jurkat	TiO2	3	f09350
sp|O75151|PHF2_HUMAN	R.RPSASS#PNNNTAAK.G	R.RPSASS#PNNNTAAK.G	RPSASSPNNNTAAK	1	14	1059	0	0	0	0	0	401.3	Jurkat_TiO2_1mg_3_f09350	Jurkat	TiO2	3	f09350
sp|Q05519|SRS11_HUMAN	K.VNGDDHHEEDM*DM*S#D.-	K.VNGDDHHEEDM*DM*S#D.-	VNGDDHHEEDMDMSD	1	15	483	1000	0	0	0	0	154.9	Jurkat_TiO2_1mg_3_f09350	Jurkat	TiO2	3	f09350
sp|Q8WUH2|TGFA1_HUMAN	R.HTNPSSSS#PGTRT.-	R.HTNPSSSS#PGTRT.-	HTNPSSSSPGTRT	1	13	855	0	0	0	0	0	314.1	Jurkat_TiO2_1mg_3_f09350	Jurkat	TiO2	3	f09350
sp|Q9UN37|VPS4A_HUMAN	K.ENQSEGKGS#DS#DSEGDNPEKK.K	K.ENQS#EGKGS#DSDSEGDNPEKK.K	ENQSEGKGSDSDSEGDNPEKK	2	21	95	27.121	97	20.167	0	0	835.5	Jurkat_TiO2_1mg_3_f09350	Jurkat	TiO2	3	f09350
sp|Q9UN37|VPS4A_HUMAN	K.ENQSEGKGS#DSDS#EGDNPEKK.K	K.ENQSEGKGS#DS#DSEGDNPEKK.K	ENQSEGKGSDSDSEGDNPEKK	2	21	95	17.009	99	6.591	0	0	132.9	Jurkat_TiO2_1mg_3_f09350	Jurkat	TiO2	3	f09350
sp|Q05519|SRS11_HUMAN	K.VNGDDHHEEDM*DM*S#D.-	K.VNGDDHHEEDM*DM*S#D.-	VNGDDHHEEDMDMSD	1	15	483	1000	0	0	0	0	394.2	Jurkat_TiO2_1mg_3_f09350	Jurkat	TiO2	3	f09350
sp|Q8IUD2|RB6I2_HUMAN	R.TNS#TGGSSGSSVGGGSGK.T	R.TNS#TGGSSGSSVGGGSGK.T	TNSTGGSSGSSVGGGSGK	1	18	37	0	0	0	0	0	77.9	Jurkat_TiO2_1mg_3_f09350	Jurkat	TiO2	3	f09350
sp|Q99442|SEC62_HUMAN	K.EESKKEETPGT#PK.K	K.EESKKEETPGT#PK.K	EESKKEETPGTPK	1	13	158	37.54	0	0	0	0	964.9	Jurkat_TiO2_1mg_3_f09350	Jurkat	TiO2	3	f09350
sp|P16402|H13_HUMAN	K.VAGAAT#PKK.S	K.VAGAAT#PKK.S	VAGAATPKK	1	9	147	1000	0	0	0	0	3194.2	Jurkat_TiO2_1mg_3_f09350	Jurkat	TiO2	3	f09350
sp|Q5T200|ZC3HD_HUMAN	R.LRS#PS#NDSAHR.S	R.LRS#PS#NDSAHR.S	LRSPSNDSAHR	2	11	1208	51.004	1210	37.54	0	0	989.7	Jurkat_TiO2_1mg_3_f09350	Jurkat	TiO2	3	f09350
sp|O76021|RL1D1_HUMAN	K.HATGKKS#PAKS#PNPSTPR.G	K.HATGKKS#PAKS#PNPSTPR.G	HATGKKSPAKSPNPSTPR	2	18	392	2.017	396	13.936	0	0	117.7	Jurkat_TiO2_1mg_3_f09350	Jurkat	TiO2	3	f09350
sp|Q9BRD0|BUD13_HUMAN	R.VRHGT#PDPS#PRK.D	R.VRHGT#PDPS#PRK.D	VRHGTPDPSPRK	2	12	135	1000	139	1000	0	0	494.6	Jurkat_TiO2_1mg_3_f09350	Jurkat	TiO2	3	f09350
sp|Q00341|VIGLN_HUMAN	K.DCDPGS#PRR.C	K.DCDPGS#PRR.C	DCDPGSPRR	1	9	944	1000	0	0	0	0	982.4	Jurkat_TiO2_1mg_3_f09350	Jurkat	TiO2	3	f09350
sp|O14497|ARI1A_HUMAN	R.PMENRTS#PSK.S	R.PMENRTS#PSK.S	PMENRTSPSK	1	10	1600	30.835	0	0	0	0	230.6	Jurkat_TiO2_1mg_3_f09350	Jurkat	TiO2	3	f09350
sp|P00558|PGK1_HUMAN		K.NNQITNNQR.I	NNQITNNQR	0	9	0	0	0	0	0	0	489.4	Jurkat_TiO2_1mg_3_f09350	Jurkat	TiO2	3	f09350
sp|O75362|ZN217_HUMAN	K.GKQS#PPGPGK.A	K.GKQS#PPGPGK.A	GKQSPPGPGK	1	10	795	1000	0	0	0	0	2052.5	Jurkat_TiO2_1mg_3_f09350	Jurkat	TiO2	3	f09350
sp|Q9UQ35|SRRM2_HUMAN	R.GRSECDSS#PEPK.A	R.GRSECDSS#PEPK.A	GRSECDSSPEPK	1	12	1483	9.34	0	0	0	0	647.7	Jurkat_TiO2_1mg_3_f09350	Jurkat	TiO2	3	f09350
sp|Q9C0C9|UBE2O_HUMAN	R.KEDKPEGQS#PVK.A	R.KEDKPEGQS#PVK.A	KEDKPEGQSPVK	1	12	896	1000	0	0	0	0	1639.4	Jurkat_TiO2_1mg_3_f09350	Jurkat	TiO2	3	f09350
sp|Q9C0C9|UBE2O_HUMAN	R.KEDKPEGQS#PVK.A	R.KEDKPEGQS#PVK.A	KEDKPEGQSPVK	1	12	896	1000	0	0	0	0	670.8	Jurkat_TiO2_1mg_3_f09350	Jurkat	TiO2	3	f09350
sp|P23588|IF4B_HUMAN	R.SQSSDTEQQS#PTSGGGK.V	R.SQSSDTEQQS#PTSGGGK.V	SQSSDTEQQSPTSGGGK	1	17	504	17.009	0	0	0	0	3665.7	Jurkat_TiO2_1mg_3_f09350	Jurkat	TiO2	3	f09350
sp|O76021|RL1D1_HUMAN	K.HATGKKS#PAKS#PNPSTPR.G	K.HATGKKS#PAKS#PNPSTPR.G	HATGKKSPAKSPNPSTPR	2	18	392	9.888	396	6.039	0	0	40.9	Jurkat_TiO2_1mg_3_f09350	Jurkat	TiO2	3	f09350
sp|O60336|MABP1_HUMAN	K.QQGPSS#PQR.A	K.QQGPSS#PQR.A	QQGPSSPQR	1	9	761	0	0	0	0	0	87.7	Jurkat_TiO2_1mg_3_f09350	Jurkat	TiO2	3	f09350
sp|Q8NDX5|PHC3_HUMAN	R.GRRPS#GPDGAAR.E	R.GRRPS#GPDGAAR.E	GRRPSGPDGAAR	1	12	842	1000	0	0	0	0	2007.8	Jurkat_TiO2_1mg_3_f09350	Jurkat	TiO2	3	f09350
sp|Q9Y2W1|TR150_HUMAN	K.AVQEKSS#S#PPPRK.T	K.AVQEKS#S#SPPPRK.T	AVQEKSSSPPPRK	2	13	534	0	535	6.591	0	0	662.7	Jurkat_TiO2_1mg_3_f09350	Jurkat	TiO2	3	f09350
sp|Q9UQ35|SRRM2_HUMAN	R.GRSECDSS#PEPK.A	R.GRSECDSS#PEPK.A	GRSECDSSPEPK	1	12	1483	30.835	0	0	0	0	317.4	Jurkat_TiO2_1mg_3_f09350	Jurkat	TiO2	3	f09350
sp|P38159|RBMX_HUMAN	R.GGS#GGTRGPPSR.G	R.GGS#GGTRGPPSR.G	GGSGGTRGPPSR	1	12	116	15.007	0	0	0	0	883.2	Jurkat_TiO2_1mg_3_f09350	Jurkat	TiO2	3	f09350
sp|Q14677|EPN4_HUMAN	K.DREDS#PERCSDS#DEEKK.A	K.DREDS#PERCSDS#DEEKK.A	DREDSPERCSDSDEEKK	2	17	227	30.612	234	4.085	0	0	730.2	Jurkat_TiO2_1mg_3_f09350	Jurkat	TiO2	3	f09350
sp|O43166|SI1L1_HUMAN	K.RHQS#DGNEIAHTR.L	K.RHQS#DGNEIAHTR.L	RHQSDGNEIAHTR	1	13	1508	69.812	0	0	0	0	221.6	Jurkat_TiO2_1mg_3_f09350	Jurkat	TiO2	3	f09350
sp|O43166|SI1L1_HUMAN	K.RHQS#DGNEIAHTR.L	K.RHQS#DGNEIAHTR.L	RHQSDGNEIAHTR	1	13	1508	114.498	0	0	0	0	221.6	Jurkat_TiO2_1mg_3_f09350	Jurkat	TiO2	3	f09350
sp|Q14677|EPN4_HUMAN	K.DREDS#PERCS#DSDEEKK.A	K.DREDS#PERCS#DSDEEKK.A	DREDSPERCSDSDEEKK	2	17	227	13.208	232	17.009	0	0	116.9	Jurkat_TiO2_1mg_3_f09350	Jurkat	TiO2	3	f09350
sp|O43166|SI1L1_HUMAN	K.RHQS#DGNEIAHTR.L	K.RHQS#DGNEIAHTR.L	RHQSDGNEIAHTR	1	13	1508	111.739	0	0	0	0	154	Jurkat_TiO2_1mg_3_f09350	Jurkat	TiO2	3	f09350
##sp|Q9NYQ8|FAT2_HUMAN	R.DTAT#VALVSTGPPINEDLTGDY#SSR.N	R.DTAT#VALVSTGPPINEDLTGDY#SSR.N	DTATVALVSTGPPINEDLTGDYSSR	2	25	3869	6.039	3887	3.359	0	0	63.1	Jurkat_TiO2_1mg_3_f09350	Jurkat	TiO2	3	f09350
sp|Q12872|SFSWA_HUMAN	K.ARS#QS#VS#PSK.Q	K.ARS#QS#VS#PSK.Q	ARSQSVSPSK	3	10	866	45.026	868	44.278	870	17.009	142.9	Jurkat_TiO2_1mg_3_f09350	Jurkat	TiO2	3	f09350
sp|Q14677|EPN4_HUMAN	K.DREDS#PERCS#DSDEEKK.A	K.DREDS#PERCS#DSDEEKK.A	DREDSPERCSDSDEEKK	2	17	227	20.985	232	17.009	0	0	116.9	Jurkat_TiO2_1mg_3_f09350	Jurkat	TiO2	3	f09350
sp|Q9BVI0|PHF20_HUMAN	K.RVSAS#SPTTK.D	K.RVSASSPT#TK.D	RVSASSPTTK	1	10	518	9.34	0	0	0	0	919.7	Jurkat_TiO2_1mg_3_f09350	Jurkat	TiO2	3	f09350
sp|P25205|MCM3_HUMAN	K.KRS#EDES#ET#EDEEEK.S	K.KRS#EDES#ET#EDEEEK.S	KRSEDESETEDEEEK	3	15	668	1000	672	1000	674	1000	2771.7	Jurkat_TiO2_1mg_3_f09350	Jurkat	TiO2	3	f09350
sp|Q03111|ENL_HUMAN	K.RPATADS#PKPSAK.K	K.RPATADS#PKPSAK.K	RPATADSPKPSAK	1	13	292	7.971	0	0	0	0	1831.5	Jurkat_TiO2_1mg_3_f09350	Jurkat	TiO2	3	f09350
sp|P25205|MCM3_HUMAN	K.KRS#EDES#ET#EDEEEK.S	K.KRS#EDES#ET#EDEEEK.S	KRSEDESETEDEEEK	3	15	668	1000	672	1000	674	1000	1801.1	Jurkat_TiO2_1mg_3_f09350	Jurkat	TiO2	3	f09350
sp|Q03111|ENL_HUMAN	K.RPATADS#PKPSAK.K	K.RPATADS#PKPSAK.K	RPATADSPKPSAK	1	13	292	31.275	0	0	0	0	313.2	Jurkat_TiO2_1mg_3_f09350	Jurkat	TiO2	3	f09350
sp|P25205|MCM3_HUMAN	K.KRS#EDES#ET#EDEEEK.S	K.KRS#EDES#ET#EDEEEK.S	KRSEDESETEDEEEK	3	15	668	1000	672	1000	674	1000	1801.1	Jurkat_TiO2_1mg_3_f09350	Jurkat	TiO2	3	f09350
sp|Q9UEE5|ST17A_HUMAN	K.PGS#GGSSPGATSGSGR.A	K.PGSGGSS#PGATSGSGR.A	PGSGGSSPGATSGSGR	1	16	9	4.085	0	0	0	0	59.1	Jurkat_TiO2_1mg_3_f09350	Jurkat	TiO2	3	f09350
sp|Q12802|AKP13_HUMAN	R.RTES#DSGLK.K	R.RTES#DSGLK.K	RTESDSGLK	1	9	2498	17.009	0	0	0	0	350.9	Jurkat_TiO2_1mg_3_f09350	Jurkat	TiO2	3	f09350
sp|P22626|ROA2_HUMAN	R.GGS#DGYGSGR.G	R.GGS#DGYGSGR.G	GGSDGYGSGR	1	10	231	53.534	0	0	0	0	97.8	Jurkat_TiO2_1mg_3_f09350	Jurkat	TiO2	3	f09350
sp|Q5UIP0|RIF1_HUMAN	K.SVKTS#PTTQSK.H	K.SVKTS#PTTQSK.H	SVKTSPTTQSK	1	11	2243	9.34	0	0	0	0	254.7	Jurkat_TiO2_1mg_3_f09350	Jurkat	TiO2	3	f09350
sp|Q9BZZ5|API5_HUMAN	R.ASEDTTSGS#PPKK.S	R.ASEDTTSGS#PPKK.S	ASEDTTSGSPPKK	1	13	464	4.085	0	0	0	0	120.1	Jurkat_TiO2_1mg_3_f09350	Jurkat	TiO2	3	f09350
sp|Q7Z417|NUFP2_HUMAN	K.HTLQQHQET#PK.K	K.HTLQQHQET#PK.K	HTLQQHQETPK	1	11	87	23.354	0	0	0	0	80.3	Jurkat_TiO2_1mg_3_f09350	Jurkat	TiO2	3	f09350
sp|Q9UQ35|SRRM2_HUMAN	R.SRS#RTS#PVTR.R	R.SRS#RTS#PVTR.R	SRSRTSPVTR	2	10	1984	0	1987	6.591	0	0	278.1	Jurkat_TiO2_1mg_3_f09350	Jurkat	TiO2	3	f09350
sp|P51532|SMCA4_HUMAN	R.KRDS#DAGSS#TPTTSTR.S	R.KRDS#DAGSS#TPTTSTR.S	KRDSDAGSSTPTTSTR	2	16	1417	11.721	1422	0	0	0	45	Jurkat_TiO2_1mg_3_f09350	Jurkat	TiO2	3	f09350
sp|Q5VTL8|PR38B_HUMAN	R.SGS#QGRTDS#VEK.S	R.SGS#QGRTDS#VEK.S	SGSQGRTDSVEK	2	12	475	9.34	481	30.835	0	0	627.1	Jurkat_TiO2_1mg_3_f09350	Jurkat	TiO2	3	f09350
sp|Q9Y6D6|BIG1_HUMAN	K.AET#EKQSPPHGEAK.A	K.AET#EKQSPPHGEAK.A	AETEKQSPPHGEAK	1	14	48	6.039	0	0	0	0	839.9	Jurkat_TiO2_1mg_3_f09350	Jurkat	TiO2	3	f09350
sp|Q5BKZ1|ZN326_HUMAN	K.SPT#KTDPKNEEEEK.R	K.SPT#KTDPKNEEEEK.R	SPTKTDPKNEEEEK	1	14	272	0	0	0	0	0	1249	Jurkat_TiO2_1mg_3_f09350	Jurkat	TiO2	3	f09350
sp|Q9BRQ0|PYGO2_HUMAN	K.AGLQM*KS#PEKK.R	K.AGLQM*KS#PEKK.R	AGLQMKSPEKK	1	11	40	1000	0	0	0	0	68.7	Jurkat_TiO2_1mg_3_f09350	Jurkat	TiO2	3	f09350
sp|Q71U36|TBA1A_HUMAN	K.EDAANNY#AR.G	K.EDAANNY#AR.G	EDAANNYAR	1	9	103	1000	0	0	0	0	96.3	Jurkat_TiO2_1mg_3_f09350	Jurkat	TiO2	3	f09350
sp|Q96MU7|YTDC1_HUMAN	R.AKS#PT#PDGSER.I	R.AKS#PT#PDGSER.I	AKSPTPDGSER	2	11	146	33.657	148	20.167	0	0	73.8	Jurkat_TiO2_1mg_3_f09350	Jurkat	TiO2	3	f09350
sp|Q13523|PRP4B_HUMAN	K.KPIKS#PS#KDASSGK.E	K.KPIKS#PS#KDASSGK.E	KPIKSPSKDASSGK	2	14	328	11.22	330	11.22	0	0	847.5	Jurkat_TiO2_1mg_3_f09350	Jurkat	TiO2	3	f09350
sp|Q14978|NOLC1_HUMAN	K.GKGS#PRPQAPK.A	K.GKGS#PRPQAPK.A	GKGSPRPQAPK	1	11	538	1000	0	0	0	0	54000.2	Jurkat_TiO2_1mg_3_f09350	Jurkat	TiO2	3	f09350
sp|Q9UQ35|SRRM2_HUMAN	R.SRTS#PVTR.R	R.SRTS#PVTR.R	SRTSPVTR	1	8	1987	24.437	0	0	0	0	5563.1	Jurkat_TiO2_1mg_3_f09350	Jurkat	TiO2	3	f09350
sp|Q5VTL8|PR38B_HUMAN	R.SGS#QGRTDS#VEK.S	R.SGS#QGRTDS#VEK.S	SGSQGRTDSVEK	2	12	475	6.039	481	20.167	0	0	84.1	Jurkat_TiO2_1mg_3_f09350	Jurkat	TiO2	3	f09350
sp|Q9UN37|VPS4A_HUMAN	K.GSDS#DSEGDNPEK.K	K.GSDS#DSEGDNPEK.K	GSDSDSEGDNPEK	1	13	97	19.843	0	0	0	0	249.8	Jurkat_TiO2_1mg_3_f09350	Jurkat	TiO2	3	f09350
sp|Q5T200|ZC3HD_HUMAN	R.HHSSSSQSGSS#IQRHSPS#PR.R	R.HHSSSSQSGSSIQRHS#PS#PR.R	HHSSSSQSGSSIQRHSPSPR	2	20	341	6.591	348	4.085	0	0	881.8	Jurkat_TiO2_1mg_3_f09350	Jurkat	TiO2	3	f09350
sp|O43719|HTSF1_HUMAN	R.RSDS#VSASER.A	R.RSDS#VSASER.A	RSDSVSASER	1	10	387	17.009	0	0	0	0	1249.9	Jurkat_TiO2_1mg_3_f09350	Jurkat	TiO2	3	f09350
sp|Q9UQ35|SRRM2_HUMAN	K.PAS#PKKPPPGER.R	K.PAS#PKKPPPGER.R	PASPKKPPPGER	1	12	2664	1000	0	0	0	0	3670.6	Jurkat_TiO2_1mg_3_f09350	Jurkat	TiO2	3	f09350
sp|Q8WX93|PALLD_HUMAN	R.SPRS#PSGHPHVR.R	R.S#PRSPSGHPHVR.R	SPRSPSGHPHVR	1	12	1104	3.696	0	0	0	0	263.2	Jurkat_TiO2_1mg_3_f09350	Jurkat	TiO2	3	f09350
sp|Q13523|PRP4B_HUMAN	K.KPIKS#PS#KDASSGK.E	K.KPIKS#PS#KDASSGK.E	KPIKSPSKDASSGK	2	14	328	30.07	330	26.927	0	0	100.8	Jurkat_TiO2_1mg_3_f09350	Jurkat	TiO2	3	f09350
sp|Q14241|ELOA1_HUMAN	R.SYS#PDHR.Q	R.SYS#PDHR.Q	SYSPDHR	1	7	151	24.437	0	0	0	0	2763.2	Jurkat_TiO2_1mg_3_f09350	Jurkat	TiO2	3	f09350
sp|Q15435|PP1R7_HUMAN	R.VESEES#GDEEGK.K	R.VESEES#GDEEGK.K	VESEESGDEEGK	1	12	27	53.534	0	0	0	0	36.2	Jurkat_TiO2_1mg_3_f09350	Jurkat	TiO2	3	f09350
sp|Q14739|LBR_HUMAN	R.RSAS#ASHQADIK.E	R.RSAS#ASHQADIK.E	RSASASHQADIK	1	12	99	17.009	0	0	0	0	1290	Jurkat_TiO2_1mg_3_f09350	Jurkat	TiO2	3	f09350
sp|Q13242|SRSF9_HUMAN	R.GRDS#PYQSR.G	R.GRDS#PYQSR.G	GRDSPYQSR	1	9	204	31.275	0	0	0	0	249.5	Jurkat_TiO2_1mg_3_f09350	Jurkat	TiO2	3	f09350
sp|Q9Y6D6|BIG1_HUMAN	K.AETEKQS#PPHGEAK.A	K.AETEKQS#PPHGEAK.A	AETEKQSPPHGEAK	1	14	52	20.167	0	0	0	0	72	Jurkat_TiO2_1mg_3_f09350	Jurkat	TiO2	3	f09350
sp|Q6PD62|CTR9_HUMAN	R.RHPKGEEGS#DDDETENGPKPK.K	R.RHPKGEEGS#DDDETENGPKPK.K	RHPKGEEGSDDDETENGPKPK	1	21	970	30.612	0	0	0	0	2217.7	Jurkat_TiO2_1mg_3_f09350	Jurkat	TiO2	3	f09350
sp|O60885|BRD4_HUMAN	K.PQQVIQHHHS#PR.H	K.PQQVIQHHHS#PR.H	PQQVIQHHHSPR	1	12	1045	1000	0	0	0	0	998.9	Jurkat_TiO2_1mg_3_f09350	Jurkat	TiO2	3	f09350
sp|P35611|ADDA_HUMAN	R.GDEASEEGQNGSS#PK.S	R.GDEASEEGQNGSS#PK.S	GDEASEEGQNGSSPK	1	15	465	24.437	0	0	0	0	206.1	Jurkat_TiO2_1mg_3_f09350	Jurkat	TiO2	3	f09350
sp|Q9H307|PININ_HUMAN	K.RSIS#ESS#R.S	K.RSIS#ESS#R.S	RSISESSR	2	8	692	6.591	695	24.437	0	0	3641.6	Jurkat_TiO2_1mg_3_f09350	Jurkat	TiO2	3	f09350
sp|Q13422|IKZF1_HUMAN	K.VETQS#DEENGR.A	K.VETQS#DEENGR.A	VETQSDEENGR	1	11	63	48.874	0	0	0	0	394.8	Jurkat_TiO2_1mg_3_f09350	Jurkat	TiO2	3	f09350
sp|Q04726|TLE3_HUMAN	K.HRGS#ADYSM*EAK.K	K.HRGS#ADYSM*EAK.K	HRGSADYSMEAK	1	12	217	45.026	0	0	0	0	134	Jurkat_TiO2_1mg_3_f09350	Jurkat	TiO2	3	f09350
sp|Q96ST2|IWS1_HUMAN	K.M*DS#DEDEKEGEEEK.V	K.M*DS#DEDEKEGEEEK.V	MDSDEDEKEGEEEK	1	14	377	1000	0	0	0	0	122.2	Jurkat_TiO2_1mg_3_f09350	Jurkat	TiO2	3	f09350
sp|Q9Y2W1|TR150_HUMAN	R.SYS#PAHNR.E	R.SYS#PAHNR.E	SYSPAHNR	1	8	55	24.437	0	0	0	0	355.8	Jurkat_TiO2_1mg_3_f09350	Jurkat	TiO2	3	f09350
sp|P49790|NU153_HUMAN	R.SHS#LSQHTATSSK.K	R.SHS#LSQHTATSSK.K	SHSLSQHTATSSK	1	13	217	4.085	0	0	0	0	110.4	Jurkat_TiO2_1mg_3_f09350	Jurkat	TiO2	3	f09350
sp|P11171|41_HUMAN	K.S#QVSEEEGK.E	K.S#QVSEEEGK.E	SQVSEEEGK	1	9	92	53.534	0	0	0	0	718.1	Jurkat_TiO2_1mg_3_f09350	Jurkat	TiO2	3	f09350
sp|Q96ST2|IWS1_HUMAN	K.M*DS#DEDEKEGEEEK.V	K.M*DS#DEDEKEGEEEK.V	MDSDEDEKEGEEEK	1	14	377	1000	0	0	0	0	92.9	Jurkat_TiO2_1mg_3_f09350	Jurkat	TiO2	3	f09350
sp|O60885|BRD4_HUMAN	K.PQQVIQHHHS#PR.H	K.PQQVIQHHHS#PR.H	PQQVIQHHHSPR	1	12	1045	1000	0	0	0	0	85.2	Jurkat_TiO2_1mg_3_f09350	Jurkat	TiO2	3	f09350
sp|O60885|BRD4_HUMAN	K.PQQVIQHHHS#PR.H	K.PQQVIQHHHS#PR.H	PQQVIQHHHSPR	1	12	1045	1000	0	0	0	0	1055.8	Jurkat_TiO2_1mg_3_f09350	Jurkat	TiO2	3	f09350
sp|Q9NYF8|BCLF1_HUMAN	R.SSSSSASPSS#PSSREEK.E	R.SSSSSASPSS#PSSREEK.E	SSSSSASPSSPSSREEK	1	17	760	0	0	0	0	0	174.3	Jurkat_TiO2_1mg_3_f09350	Jurkat	TiO2	3	f09350
sp|Q9UN37|VPS4A_HUMAN	K.ENQSEGKGSDS#DSEGDNPEK.K	K.ENQSEGKGSDS#DSEGDNPEK.K	ENQSEGKGSDSDSEGDNPEK	1	20	97	4.085	0	0	0	0	503.6	Jurkat_TiO2_1mg_3_f09350	Jurkat	TiO2	3	f09350
sp|Q96ST2|IWS1_HUMAN	K.M*DS#DEDEKEGEEEK.V	K.M*DS#DEDEKEGEEEK.V	MDSDEDEKEGEEEK	1	14	377	1000	0	0	0	0	122.2	Jurkat_TiO2_1mg_3_f09350	Jurkat	TiO2	3	f09350
sp|Q01518|CAP1_HUMAN	K.PQTS#PSPK.R	K.PQTS#PSPK.R	PQTSPSPK	1	8	308	6.591	0	0	0	0	2332.8	Jurkat_TiO2_1mg_3_f09350	Jurkat	TiO2	3	f09350
sp|Q16777|H2A2C_HUMAN		R.NDEELNK.L	NDEELNK	0	7	0	0	0	0	0	0	7351.7	Jurkat_TiO2_1mg_3_f09350	Jurkat	TiO2	3	f09350
sp|Q8ND82|Z280C_HUMAN	K.SERPCDEDKTDS#ETGK.L	K.SERPCDEDKTDS#ETGK.L	SERPCDEDKTDSETGK	1	16	285	11.015	0	0	0	0	268.1	Jurkat_TiO2_1mg_3_f09350	Jurkat	TiO2	3	f09350
sp|Q6ICG6|K0930_HUMAN	R.SRS#LSGTGR.S	R.SRS#LSGTGR.S	SRSLSGTGR	1	9	351	17.009	0	0	0	0	93	Jurkat_TiO2_1mg_3_f09350	Jurkat	TiO2	3	f09350
sp|P11171|41_HUMAN	K.RPKS#QVS#EEEGK.E	K.RPKS#QVS#EEEGK.E	RPKSQVSEEEGK	2	12	92	1000	95	1000	0	0	304.2	Jurkat_TiO2_1mg_3_f09350	Jurkat	TiO2	3	f09350
sp|Q8ND82|Z280C_HUMAN	K.SERPCDEDKTDS#ETGK.L	K.SERPCDEDKTDS#ETGK.L	SERPCDEDKTDSETGK	1	16	285	17.009	0	0	0	0	19.5	Jurkat_TiO2_1mg_3_f09350	Jurkat	TiO2	3	f09350
sp|O00512|BCL9_HUMAN	K.VRSS#PSGNTQSS#PK.S	K.VRSS#PSGNTQSS#PK.S	VRSSPSGNTQSSPK	2	14	11	0	19	0	0	0	116.8	Jurkat_TiO2_1mg_3_f09350	Jurkat	TiO2	3	f09350
sp|Q9UN37|VPS4A_HUMAN	K.ENQSEGKGS#DSDSEGDNPEK.K	K.ENQSEGKGS#DSDSEGDNPEK.K	ENQSEGKGSDSDSEGDNPEK	1	20	95	9.296	0	0	0	0	123.3	Jurkat_TiO2_1mg_3_f09350	Jurkat	TiO2	3	f09350
sp|Q9UN37|VPS4A_HUMAN	K.ENQSEGKGS#DSDSEGDNPEK.K	K.ENQSEGKGS#DSDSEGDNPEK.K	ENQSEGKGSDSDSEGDNPEK	1	20	95	6.591	0	0	0	0	123.3	Jurkat_TiO2_1mg_3_f09350	Jurkat	TiO2	3	f09350
sp|Q9H4A3|WNK1_HUMAN	R.SGS#GGGSAKEPQEER.S	R.SGSGGGS#AKEPQEER.S	SGSGGGSAKEPQEER	1	15	185	0	0	0	0	0	317.4	Jurkat_TiO2_1mg_3_f09350	Jurkat	TiO2	3	f09350
sp|Q8WX93|PALLD_HUMAN	R.GRS#PRS#PSGHPHVR.R	R.GRS#PRS#PSGHPHVR.R	GRSPRSPSGHPHVR	2	14	1101	15.381	1104	4.085	0	0	1759.9	Jurkat_TiO2_1mg_3_f09350	Jurkat	TiO2	3	f09350
sp|O75592|MYCB2_HUMAN	R.LSS#PKPK.T	R.LSS#PKPK.T	LSSPKPK	1	7	2783	24.437	0	0	0	0	114.3	Jurkat_TiO2_1mg_3_f09350	Jurkat	TiO2	3	f09350
sp|Q14677|EPN4_HUMAN	K.DREDS#PERCS#DS#DEEKK.A	K.DREDS#PERCS#DS#DEEKK.A	DREDSPERCSDSDEEKK	3	17	227	1000	232	1000	234	1000	12.1	Jurkat_TiO2_1mg_3_f09350	Jurkat	TiO2	3	f09350
sp|P42575|CASP2_HUMAN	K.NHAGS#PGCEESDAGK.E	K.NHAGS#PGCEESDAGK.E	NHAGSPGCEESDAGK	1	15	340	45.026	0	0	0	0	429	Jurkat_TiO2_1mg_3_f09350	Jurkat	TiO2	3	f09350
sp|Q13185|CBX3_HUMAN	K.RKS#LS#DS#ESDDSK.S	K.RKS#LS#DS#ESDDSK.S	RKSLSDSESDDSK	3	13	93	23.624	95	11.015	97	6.591	1702.6	Jurkat_TiO2_1mg_3_f09350	Jurkat	TiO2	3	f09350
sp|Q8N556|AFAP1_HUMAN	K.RTGS#NAAQYK.Y	K.RTGS#NAAQYK.Y	RTGSNAAQYK	1	10	548	48.874	0	0	0	0	482.9	Jurkat_TiO2_1mg_3_f09350	Jurkat	TiO2	3	f09350
sp|Q9NRA8|4ET_HUMAN	R.RSGS#PLEK.D	R.RSGS#PLEK.D	RSGSPLEK	1	8	138	6.591	0	0	0	0	143.7	Jurkat_TiO2_1mg_3_f09350	Jurkat	TiO2	3	f09350
sp|Q14978|NOLC1_HUMAN	K.GKGS#PRPQAPK.A	K.GKGS#PRPQAPK.A	GKGSPRPQAPK	1	11	538	1000	0	0	0	0	11645.8	Jurkat_TiO2_1mg_3_f09350	Jurkat	TiO2	3	f09350
sp|P23588|IF4B_HUMAN	R.SRTGS#ESS#QTGTSTTSSR.N	R.SRTGS#ESS#QTGTSTTSSR.N	SRTGSESSQTGTSTTSSR	2	18	422	4.085	425	0	0	0	3481.5	Jurkat_TiO2_1mg_3_f09350	Jurkat	TiO2	3	f09350
sp|Q9UQ35|SRRM2_HUMAN	R.SRSGS#S#PEVDSK.S	R.SRSGS#S#PEVDSK.S	SRSGSSPEVDSK	2	12	1581	17.009	1582	37.54	0	0	759.9	Jurkat_TiO2_1mg_3_f09350	Jurkat	TiO2	3	f09350
sp|Q9HDC5|JPH1_HUMAN	K.HSHS#PASS#PKPLKK.Q	K.HSHS#PASS#PKPLKK.Q	HSHSPASSPKPLKK	2	14	475	4.54	479	6.591	0	0	1251.3	Jurkat_TiO2_1mg_3_f09350	Jurkat	TiO2	3	f09350
sp|Q86U70|LDB1_HUMAN	K.RKMS#GGSTMSSGGGNTNNSNSK.K	K.RKMSGGS#TMSSGGGNTNNSNSK.K	RKMSGGSTMSSGGGNTNNSNSK	1	22	302	7.971	0	0	0	0	1422.3	Jurkat_TiO2_1mg_3_f09350	Jurkat	TiO2	3	f09350
sp|Q9HDC5|JPH1_HUMAN	K.HSHS#PASS#PKPLKK.Q	K.HSHS#PASS#PKPLKK.Q	HSHSPASSPKPLKK	2	14	475	19.843	479	0	0	0	160.3	Jurkat_TiO2_1mg_3_f09350	Jurkat	TiO2	3	f09350
sp|O60885|BRD4_HUMAN	K.HPTT#PSS#TAK.S	K.HPTTPS#S#TAK.S	HPTTPSSTAK	2	10	1212	6.591	1215	6.591	0	0	106.3	Jurkat_TiO2_1mg_3_f09350	Jurkat	TiO2	3	f09350
sp|Q8IZP0|ABI1_HUMAN	R.HNS#TTSSTSSGGYR.R	R.HNS#TTSSTSSGGYR.R	HNSTTSSTSSGGYR	1	14	323	9.34	0	0	0	0	59.2	Jurkat_TiO2_1mg_3_f09350	Jurkat	TiO2	3	f09350
sp|Q96JQ2|CLMN_HUMAN	K.KKDS#PEPQVK.M	K.KKDS#PEPQVK.M	KKDSPEPQVK	1	10	619	1000	0	0	0	0	314.8	Jurkat_TiO2_1mg_3_f09350	Jurkat	TiO2	3	f09350
sp|Q96JQ2|CLMN_HUMAN	K.KKDS#PEPQVK.M	K.KKDS#PEPQVK.M	KKDSPEPQVK	1	10	619	1000	0	0	0	0	135.2	Jurkat_TiO2_1mg_3_f09350	Jurkat	TiO2	3	f09350
sp|O75351|VPS4B_HUMAN	K.GNDS#DGEGESDDPEKK.K	K.GNDS#DGEGESDDPEKK.K	GNDSDGEGESDDPEKK	1	16	102	45.026	0	0	0	0	71	Jurkat_TiO2_1mg_3_f09350	Jurkat	TiO2	3	f09350
sp|P42575|CASP2_HUMAN	K.NHAGS#PGCEESDAGK.E	K.NHAGS#PGCEESDAGK.E	NHAGSPGCEESDAGK	1	15	340	110.633	0	0	0	0	411.9	Jurkat_TiO2_1mg_3_f09350	Jurkat	TiO2	3	f09350
sp|Q86U70|LDB1_HUMAN	K.RKMSGGST#MSSGGGNTNNSNSK.K	K.RKMS#GGSTMSSGGGNTNNSNSK.K	RKMSGGSTMSSGGGNTNNSNSK	1	22	306	0	0	0	0	0	301	Jurkat_TiO2_1mg_3_f09350	Jurkat	TiO2	3	f09350
sp|P78362|SRPK2_HUMAN	K.SSS#SERPEPQQK.A	K.SSS#SERPEPQQK.A	SSSSERPEPQQK	1	12	10	6.591	0	0	0	0	888.7	Jurkat_TiO2_1mg_3_f09350	Jurkat	TiO2	3	f09350
sp|Q08170|SRSF4_HUMAN	R.EGRGES#ENAGTNQETR.S	R.EGRGES#ENAGTNQETR.S	EGRGESENAGTNQETR	1	16	431	39.663	0	0	0	0	367.4	Jurkat_TiO2_1mg_3_f09350	Jurkat	TiO2	3	f09350
sp|P84103|SRSF3_HUMAN	R.NHKPSRS#FS#R.S	R.NHKPS#RS#FSR.S	NHKPSRSFSR	2	10	150	0	152	4.085	0	0	25.2	Jurkat_TiO2_1mg_3_f09350	Jurkat	TiO2	3	f09350
sp|P07900|HS90A_HUMAN	K.ERDKEVS#DDEAEEK.E	K.ERDKEVS#DDEAEEK.E	ERDKEVSDDEAEEK	1	14	231	1000	0	0	0	0	890.4	Jurkat_TiO2_1mg_3_f09350	Jurkat	TiO2	3	f09350
sp|Q08170|SRSF4_HUMAN	R.EGRGES#ENAGTNQETR.S	R.EGRGES#ENAGTNQETR.S	EGRGESENAGTNQETR	1	16	431	9.296	0	0	0	0	279.2	Jurkat_TiO2_1mg_3_f09350	Jurkat	TiO2	3	f09350
sp|O75351|VPS4B_HUMAN	K.GNDS#DGEGESDDPEKK.K	K.GNDS#DGEGESDDPEKK.K	GNDSDGEGESDDPEKK	1	16	102	33.657	0	0	0	0	9623.6	Jurkat_TiO2_1mg_3_f09350	Jurkat	TiO2	3	f09350
sp|Q12906|ILF3_HUMAN	R.DSSKGEDS#AEETEAK.P	R.DSSKGEDS#AEETEAK.P	DSSKGEDSAEETEAK	1	15	482	31.275	0	0	0	0	16748	Jurkat_TiO2_1mg_3_f09350	Jurkat	TiO2	3	f09350
sp|Q86VM9|ZCH18_HUMAN	R.DSS#TQPPK.S	R.DSS#TQPPK.S	DSSTQPPK	1	8	775	24.437	0	0	0	0	340.3	Jurkat_TiO2_1mg_3_f09350	Jurkat	TiO2	3	f09350
sp|Q8IU81|I2BP1_HUMAN	R.RKAS#PEPEGEAAGK.M	R.RKAS#PEPEGEAAGK.M	RKASPEPEGEAAGK	1	14	384	1000	0	0	0	0	2293.5	Jurkat_TiO2_1mg_3_f09350	Jurkat	TiO2	3	f09350
sp|Q12906|ILF3_HUMAN	R.DSSKGEDS#AEETEAK.P	R.DSSKGEDS#AEETEAK.P	DSSKGEDSAEETEAK	1	15	482	16.144	0	0	0	0	13425.1	Jurkat_TiO2_1mg_3_f09350	Jurkat	TiO2	3	f09350
sp|Q5T200|ZC3HD_HUMAN	R.ERDQRPS#SPIRHQGR.N	R.ERDQRPS#SPIRHQGR.N	ERDQRPSSPIRHQGR	1	15	642	0	0	0	0	0	384.8	Jurkat_TiO2_1mg_3_f09350	Jurkat	TiO2	3	f09350
sp|Q13185|CBX3_HUMAN	K.RKS#LS#DSES#DDSK.S	K.RKS#LS#DSES#DDSK.S	RKSLSDSESDDSK	3	13	93	36.556	95	44.278	99	11.015	1273.1	Jurkat_TiO2_1mg_3_f09350	Jurkat	TiO2	3	f09350
sp|Q86WB0|NIPA_HUMAN	R.LCS#SSSSDTSSR.S	R.LCSSSS#SDTSSR.S	LCSSSSSDTSSR	1	12	407	17.009	0	0	0	0	136.7	Jurkat_TiO2_1mg_3_f09350	Jurkat	TiO2	3	f09350
sp|Q8IU81|I2BP1_HUMAN	R.RKAS#PEPEGEAAGK.M	R.RKAS#PEPEGEAAGK.M	RKASPEPEGEAAGK	1	14	384	1000	0	0	0	0	727.4	Jurkat_TiO2_1mg_3_f09350	Jurkat	TiO2	3	f09350
sp|Q9NU22|MDN1_HUMAN		K.SQQDKKEEKEEAEADDGGQGEDK.I	SQQDKKEEKEEAEADDGGQGEDK	0	23	0	0	0	0	0	0	53.9	Jurkat_TiO2_1mg_3_f09350	Jurkat	TiO2	3	f09350
sp|P43243|MATR3_HUMAN	K.RSYSPDGKES#PSDKK.S	K.RSYSPDGKES#PSDKK.S	RSYSPDGKESPSDKK	1	15	604	11.015	0	0	0	0	680.9	Jurkat_TiO2_1mg_3_f09350	Jurkat	TiO2	3	f09350
sp|Q6PD62|CTR9_HUMAN	R.HPKGEEGS#DDDETENGPK.P	R.HPKGEEGS#DDDETENGPK.P	HPKGEEGSDDDETENGPK	1	18	970	49.59	0	0	0	0	296.6	Jurkat_TiO2_1mg_3_f09350	Jurkat	TiO2	3	f09350
sp|Q9NU22|MDN1_HUMAN		K.SQQDKKEEKEEAEADDGGQGEDK.I	SQQDKKEEKEEAEADDGGQGEDK	0	23	0	0	0	0	0	0	7.1943	Jurkat_TiO2_1mg_3_f09350	Jurkat	TiO2	3	f09350
sp|P06454|PTMA_HUMAN		K.RAAEDDEDDDVDTKK.Q	RAAEDDEDDDVDTKK	0	15	0	0	0	0	0	0	3129	Jurkat_TiO2_1mg_3_f09350	Jurkat	TiO2	3	f09350
sp|Q9NUJ3|T11L1_HUMAN	R.VQRPHS#SPPR.F	R.VQRPHS#SPPR.F	VQRPHSSPPR	1	10	55	17.009	0	0	0	0	234.2	Jurkat_TiO2_1mg_3_f09350	Jurkat	TiO2	3	f09350
sp|Q13427|PPIG_HUMAN	K.IRSS#VEK.E	K.IRSS#VEK.E	IRSSVEK	1	7	717	9.34	0	0	0	0	13094.5	Jurkat_TiO2_1mg_3_f09350	Jurkat	TiO2	3	f09350
sp|Q9BRD0|BUD13_HUMAN	R.HGT#PDPS#PRK.D	R.HGT#PDPS#PRK.D	HGTPDPSPRK	2	10	135	1000	139	1000	0	0	7966.5	Jurkat_TiO2_1mg_3_f09350	Jurkat	TiO2	3	f09350
sp|P49321|NASP_HUMAN	K.VAQGATEKS#PEDK.V	K.VAQGATEKS#PEDK.V	VAQGATEKSPEDK	1	13	451	13.38	0	0	0	0	798.2	Jurkat_TiO2_1mg_3_f09350	Jurkat	TiO2	3	f09350
sp|Q96T37|RBM15_HUMAN	R.HLDRS#PESDRPRK.R	R.HLDRSPES#DRPRK.R	HLDRSPESDRPRK	1	13	656	23.624	0	0	0	0	2636.8	Jurkat_TiO2_1mg_3_f09350	Jurkat	TiO2	3	f09350
sp|P06454|PTMA_HUMAN		K.RAAEDDEDDDVDTKK.Q	RAAEDDEDDDVDTKK	0	15	0	0	0	0	0	0	407.3	Jurkat_TiO2_1mg_3_f09350	Jurkat	TiO2	3	f09350
sp|P43243|MATR3_HUMAN	K.RSYSPDGKES#PSDKK.S	K.RSYSPDGKES#PSDKK.S	RSYSPDGKESPSDKK	1	15	604	6.591	0	0	0	0	149.4	Jurkat_TiO2_1mg_3_f09350	Jurkat	TiO2	3	f09350
sp|Q8IYB3|SRRM1_HUMAN	K.RES#PSPAPK.P	K.RES#PSPAPK.P	RESPSPAPK	1	9	450	17.009	0	0	0	0	5122.9	Jurkat_TiO2_1mg_3_f09350	Jurkat	TiO2	3	f09350
sp|Q04724|TLE1_HUMAN	K.SST#PTPR.S	K.SST#PTPR.S	SSTPTPR	1	7	319	6.591	0	0	0	0	95.8	Jurkat_TiO2_1mg_3_f09350	Jurkat	TiO2	3	f09350
sp|P62995|TRA2B_HUMAN	R.HS#HS#HS#PMSTR.R	R.HS#HS#HS#PMSTR.R	HSHSHSPMSTR	3	11	95	58.551	97	17.25	99	24.243	214.7	Jurkat_TiO2_1mg_3_f09350	Jurkat	TiO2	3	f09350
sp|Q96ST2|IWS1_HUMAN	K.KFHS#S#DS#EEEEHK.K	K.KFHS#S#DS#EEEEHK.K	KFHSSDSEEEEHK	3	13	362	1000	363	1000	365	1000	302.8	Jurkat_TiO2_1mg_3_f09350	Jurkat	TiO2	3	f09350
sp|P61604|CH10_HUMAN		R.SAAETVTK.G	SAAETVTK	0	8	0	0	0	0	0	0	100.5	Jurkat_TiO2_1mg_3_f09350	Jurkat	TiO2	3	f09350
sp|Q9UQ35|SRRM2_HUMAN	R.HSLSGS#SPGM*K.D	R.HSLSGS#SPGM*K.D	HSLSGSSPGMK	1	11	1462	0	0	0	0	0	121.5	Jurkat_TiO2_1mg_3_f09350	Jurkat	TiO2	3	f09350
sp|P25205|MCM3_HUMAN	K.KRS#EDES#ETEDEEEK.S	K.KRS#EDES#ETEDEEEK.S	KRSEDESETEDEEEK	2	15	668	34.089	672	11.015	0	0	579.8	Jurkat_TiO2_1mg_3_f09350	Jurkat	TiO2	3	f09350
sp|P25205|MCM3_HUMAN	K.KRS#EDESET#EDEEEK.S	K.KRS#EDESET#EDEEEK.S	KRSEDESETEDEEEK	2	15	668	31.275	674	6.591	0	0	336.3	Jurkat_TiO2_1mg_3_f09350	Jurkat	TiO2	3	f09350
sp|P38398|BRCA1_HUMAN	K.NKEPGVERSS#PSK.C	K.NKEPGVERSS#PSK.C	NKEPGVERSSPSK	1	13	1497	0	0	0	0	0	469.2	Jurkat_TiO2_1mg_3_f09350	Jurkat	TiO2	3	f09350
sp|Q9UIF9|BAZ2A_HUMAN	R.GRES#PAAGPR.Y	R.GRES#PAAGPR.Y	GRESPAAGPR	1	10	1770	1000	0	0	0	0	919.7	Jurkat_TiO2_1mg_3_f09350	Jurkat	TiO2	3	f09350
sp|P20020|AT2B1_HUMAN	K.RNSS#PPPS#PNK.N	K.RNS#SPPPS#PNK.N	RNSSPPPSPNK	2	11	1216	24.437	1220	81.692	0	0	404.1	Jurkat_TiO2_1mg_3_f09350	Jurkat	TiO2	3	f09350
sp|Q8IY18|SMC5_HUMAN	K.KTST#PS#PQPSK.R	K.KTST#PS#PQPSK.R	KTSTPSPQPSK	2	11	10	9.34	12	24.243	0	0	859.6	Jurkat_TiO2_1mg_3_f09350	Jurkat	TiO2	3	f09350
sp|Q9UGN5|PARP2_HUMAN	K.RVNNGNTAPEDSS#PAKK.T	K.RVNNGNTAPEDSS#PAKK.T	RVNNGNTAPEDSSPAKK	1	17	34	17.009	0	0	0	0	424.8	Jurkat_TiO2_1mg_3_f09350	Jurkat	TiO2	3	f09350
sp|Q01831|XPC_HUMAN	K.RSKPSS#S#EEDEGPGDKQEK.A	K.RSKPSS#S#EEDEGPGDKQEK.A	RSKPSSSEEDEGPGDKQEK	2	19	398	0	399	0	0	0	48.7	Jurkat_TiO2_1mg_3_f09350	Jurkat	TiO2	3	f09350
sp|Q9C0B5|ZDHC5_HUMAN	R.TSSSSDDSKRS#PLGK.T	R.TSSSSDDSKRS#PLGK.T	TSSSSDDSKRSPLGK	1	15	593	24.243	0	0	0	0	94.2	Jurkat_TiO2_1mg_3_f09350	Jurkat	TiO2	3	f09350
sp|Q9UGN5|PARP2_HUMAN	K.RVNNGNTAPEDSS#PAKK.T	K.RVNNGNTAPEDSS#PAKK.T	RVNNGNTAPEDSSPAKK	1	17	34	9.34	0	0	0	0	34.7	Jurkat_TiO2_1mg_3_f09350	Jurkat	TiO2	3	f09350
sp|Q9UQ35|SRRM2_HUMAN	R.RRPS#PQPSPR.D	R.RRPS#PQPSPR.D	RRPSPQPSPR	1	10	2702	47.045	0	0	0	0	6666.8	Jurkat_TiO2_1mg_3_f09350	Jurkat	TiO2	3	f09350
sp|Q8IYB3|SRRM1_HUMAN	K.S#RS#PS#PAPEKK.E	K.S#RS#PS#PAPEKK.E	SRSPSPAPEKK	3	11	207	1000	209	1000	211	1000	1643.3	Jurkat_TiO2_1mg_3_f09350	Jurkat	TiO2	3	f09350
sp|Q6PD62|CTR9_HUMAN	R.HPKGEEGS#DDDETENGPKPK.K	R.HPKGEEGS#DDDETENGPKPK.K	HPKGEEGSDDDETENGPKPK	1	20	970	9.394	0	0	0	0	181.1	Jurkat_TiO2_1mg_3_f09350	Jurkat	TiO2	3	f09350
sp|Q9UQ35|SRRM2_HUMAN	R.RRPS#PQPSPR.D	R.RRPS#PQPSPR.D	RRPSPQPSPR	1	10	2702	20.167	0	0	0	0	1382.1	Jurkat_TiO2_1mg_3_f09350	Jurkat	TiO2	3	f09350
sp|O75351|VPS4B_HUMAN	K.GNDS#DGEGESDDPEKK.K	K.GNDS#DGEGESDDPEKK.K	GNDSDGEGESDDPEKK	1	16	102	34.089	0	0	0	0	7871	Jurkat_TiO2_1mg_3_f09350	Jurkat	TiO2	3	f09350
sp|P58876|H2B1D_HUMAN		K.HAVSEGTKAVTK.Y	HAVSEGTKAVTK	0	12	0	0	0	0	0	0	75.2	Jurkat_TiO2_1mg_3_f09350	Jurkat	TiO2	3	f09350
sp|Q6PD62|CTR9_HUMAN	R.HPKGEEGS#DDDETENGPKPK.K	R.HPKGEEGS#DDDETENGPKPK.K	HPKGEEGSDDDETENGPKPK	1	20	970	71.949	0	0	0	0	155	Jurkat_TiO2_1mg_3_f09350	Jurkat	TiO2	3	f09350
sp|P78332|RBM6_HUMAN	K.KEES#PPPPK.V	K.KEES#PPPPK.V	KEESPPPPK	1	9	891	1000	0	0	0	0	2423.9	Jurkat_TiO2_1mg_3_f09350	Jurkat	TiO2	3	f09350
sp|Q15696|U2AFM_HUMAN	R.RNPS#PDHSYK.R	R.RNPS#PDHSYK.R	RNPSPDHSYK	1	10	384	31.275	0	0	0	0	50.5	Jurkat_TiO2_1mg_3_f09350	Jurkat	TiO2	3	f09350
sp|Q9Y5B6|PAXB1_HUMAN	R.EDENDAS#DDEDDDEK.R	R.EDENDAS#DDEDDDEK.R	EDENDASDDEDDDEK	1	15	262	1000	0	0	0	0	23.4	Jurkat_TiO2_1mg_3_f09350	Jurkat	TiO2	3	f09350
sp|Q9BVI0|PHF20_HUMAN	K.SLSSS#PDKR.E	K.SLSSS#PDKR.E	SLSSSPDKR	1	9	159	9.34	0	0	0	0	1101.6	Jurkat_TiO2_1mg_3_f09350	Jurkat	TiO2	3	f09350
sp|Q8IYB3|SRRM1_HUMAN	K.RRS#PS#LSSK.H	K.RRS#PS#LSSK.H	RRSPSLSSK	2	9	653	31.275	655	17.009	0	0	78548.8	Jurkat_TiO2_1mg_3_f09350	Jurkat	TiO2	3	f09350
sp|Q9UN37|VPS4A_HUMAN	K.ENQSEGKGS#DS#DS#EGDNPEKK.K	K.ENQS#EGKGS#DSDS#EGDNPEKK.K	ENQSEGKGSDSDSEGDNPEKK	3	21	95	1.728	97	3.3	99	12.955	15.5	Jurkat_TiO2_1mg_3_f09350	Jurkat	TiO2	3	f09350
sp|P31948|STIP1_HUMAN	R.HDS#PEDVK.R	R.HDS#PEDVK.R	HDSPEDVK	1	8	481	1000	0	0	0	0	3757.5	Jurkat_TiO2_1mg_3_f09350	Jurkat	TiO2	3	f09350
sp|O75909|CCNK_HUMAN	K.KPSPQPSS#PR.Q	K.KPSPQPSS#PR.Q	KPSPQPSSPR	1	10	329	0	0	0	0	0	6542.3	Jurkat_TiO2_1mg_3_f09350	Jurkat	TiO2	3	f09350
sp|Q16695|H31T_HUMAN	K.VARKS#APATGGVK.K	K.VARKS#APATGGVK.K	VARKSAPATGGVK	1	13	29	44.278	0	0	0	0	1206.5	Jurkat_TiO2_1mg_3_f09350	Jurkat	TiO2	3	f09350
sp|P26038|MOES_HUMAN	K.DRS#EEERTTEAEK.N	K.DRS#EEERTTEAEK.N	DRSEEERTTEAEK	1	13	504	34.089	0	0	0	0	173.1	Jurkat_TiO2_1mg_3_f09350	Jurkat	TiO2	3	f09350
sp|Q9Y5B6|PAXB1_HUMAN	R.EDENDAS#DDEDDDEK.R	R.EDENDAS#DDEDDDEK.R	EDENDASDDEDDDEK	1	15	262	1000	0	0	0	0	17.7	Jurkat_TiO2_1mg_3_f09350	Jurkat	TiO2	3	f09350
sp|P16949|STMN1_HUMAN	R.RKS#HEAEVLK.Q	R.RKS#HEAEVLK.Q	RKSHEAEVLK	1	10	63	1000	0	0	0	0	2135.9	Jurkat_TiO2_1mg_3_f09350	Jurkat	TiO2	3	f09350
sp|O75909|CCNK_HUMAN	K.KPSPQPSS#PR.Q	K.KPSPQPSS#PR.Q	KPSPQPSSPR	1	10	329	6.591	0	0	0	0	369.4	Jurkat_TiO2_1mg_3_f09350	Jurkat	TiO2	3	f09350
sp|P25205|MCM3_HUMAN	K.RSEDES#ET#EDEEEK.S	K.RSEDES#ET#EDEEEK.S	RSEDESETEDEEEK	2	14	672	48.315	674	35.777	0	0	7468	Jurkat_TiO2_1mg_3_f09350	Jurkat	TiO2	3	f09350
sp|Q1KMD3|HNRL2_HUMAN	K.AAEEQGDDQDS#EKSKPAGS#DGERR.G	K.AAEEQGDDQDS#EKSKPAGS#DGERR.G	AAEEQGDDQDSEKSKPAGSDGERR	2	24	185	23.624	193	15.381	0	0	14	Jurkat_TiO2_1mg_3_f09350	Jurkat	TiO2	3	f09350
sp|Q6GYQ0|RGPA1_HUMAN	R.SATTTGS#PGTEK.A	R.SATTTGS#PGTEK.A	SATTTGSPGTEK	1	12	740	0	0	0	0	0	296.4	Jurkat_TiO2_1mg_3_f09350	Jurkat	TiO2	3	f09350
sp|Q9HC52|CBX8_HUMAN	R.VDDKPSS#PGDSSK.K	R.VDDKPSS#PGDSSK.K	VDDKPSSPGDSSK	1	13	191	24.437	0	0	0	0	1193.2	Jurkat_TiO2_1mg_3_f09350	Jurkat	TiO2	3	f09350
sp|Q9HC52|CBX8_HUMAN	R.VDDKPSS#PGDSSK.K	R.VDDKPSS#PGDSSK.K	VDDKPSSPGDSSK	1	13	191	16.144	0	0	0	0	961.6	Jurkat_TiO2_1mg_3_f09350	Jurkat	TiO2	3	f09350
sp|Q9UQ35|SRRM2_HUMAN	R.RRPS#PQPSPR.D	R.RRPS#PQPSPR.D	RRPSPQPSPR	1	10	2702	11.015	0	0	0	0	1382.9	Jurkat_TiO2_1mg_3_f09350	Jurkat	TiO2	3	f09350
sp|P23528|COF1_HUMAN	K.SST#PEEVKK.R	K.SST#PEEVKK.R	SSTPEEVKK	1	9	25	24.437	0	0	0	0	1206.5	Jurkat_TiO2_1mg_3_f09350	Jurkat	TiO2	3	f09350
sp|Q96JM3|CHAP1_HUMAN	R.TTS#PEPR.K	R.TTS#PEPR.K	TTSPEPR	1	7	275	24.437	0	0	0	0	1392.7	Jurkat_TiO2_1mg_3_f09350	Jurkat	TiO2	3	f09350
sp|Q6GYQ0|RGPA1_HUMAN	R.SATTTGS#PGTEK.A	R.SATTTGS#PGTEK.A	SATTTGSPGTEK	1	12	740	13.38	0	0	0	0	296.4	Jurkat_TiO2_1mg_3_f09350	Jurkat	TiO2	3	f09350
sp|Q9BUQ8|DDX23_HUMAN	K.RSS#LS#PGRGK.D	K.RSS#LS#PGRGK.D	RSSLSPGRGK	2	10	107	24.437	109	37.54	0	0	26752.9	Jurkat_TiO2_1mg_3_f09350	Jurkat	TiO2	3	f09350
sp|P25205|MCM3_HUMAN	K.RSEDES#ET#EDEEEK.S	K.RSEDES#ET#EDEEEK.S	RSEDESETEDEEEK	2	14	672	6.454	674	13.378	0	0	3412.1	Jurkat_TiO2_1mg_3_f09350	Jurkat	TiO2	3	f09350
sp|Q9UHB6|LIMA1_HUMAN	K.QQS#PQEPK.S	K.QQS#PQEPK.S	QQSPQEPK	1	8	698	1000	0	0	0	0	1054.5	Jurkat_TiO2_1mg_3_f09350	Jurkat	TiO2	3	f09350
sp|Q01518|CAP1_HUMAN	K.PQTS#PSPK.R	K.PQTS#PSPK.R	PQTSPSPK	1	8	308	6.591	0	0	0	0	617.9	Jurkat_TiO2_1mg_3_f09350	Jurkat	TiO2	3	f09350
sp|Q8NDX5|PHC3_HUMAN	R.RPS#GPDGAAR.E	R.RPS#GPDGAAR.E	RPSGPDGAAR	1	10	842	1000	0	0	0	0	44.1	Jurkat_TiO2_1mg_3_f09350	Jurkat	TiO2	3	f09350
sp|P51532|SMCA4_HUMAN	K.RDSDAGSST#PTTSTR.S	K.RDSDAGSST#PTTSTR.S	RDSDAGSSTPTTSTR	1	15	1423	17.009	0	0	0	0	58.1	Jurkat_TiO2_1mg_3_f09350	Jurkat	TiO2	3	f09350
sp|Q14677|EPN4_HUMAN	K.DREDS#PERCS#DS#DEEKK.A	K.DREDS#PERCS#DS#DEEKK.A	DREDSPERCSDSDEEKK	3	17	227	1000	232	1000	234	1000	1972.6	Jurkat_TiO2_1mg_3_f09350	Jurkat	TiO2	3	f09350
sp|P50750|CDK9_HUMAN	R.RKGS#QITQQSTNQSR.N	R.RKGS#QITQQSTNQSR.N	RKGSQITQQSTNQSR	1	15	347	23.624	0	0	0	0	656.4	Jurkat_TiO2_1mg_3_f09350	Jurkat	TiO2	3	f09350
sp|Q14677|EPN4_HUMAN	K.DREDS#PERCS#DS#DEEKK.A	K.DREDS#PERCS#DS#DEEKK.A	DREDSPERCSDSDEEKK	3	17	227	1000	232	1000	234	1000	1972.6	Jurkat_TiO2_1mg_3_f09350	Jurkat	TiO2	3	f09350
sp|O75113|N4BP1_HUMAN	K.RRFS#DSEER.H	K.RRFS#DSEER.H	RRFSDSEER	1	9	288	44.278	0	0	0	0	1099.3	Jurkat_TiO2_1mg_3_f09350	Jurkat	TiO2	3	f09350
sp|O75351|VPS4B_HUMAN	K.GNDS#DGEGESDDPEKK.K	K.GNDS#DGEGESDDPEKK.K	GNDSDGEGESDDPEKK	1	16	102	42.869	0	0	0	0	7871	Jurkat_TiO2_1mg_3_f09350	Jurkat	TiO2	3	f09350
sp|P50750|CDK9_HUMAN	R.RKGS#QITQQSTNQSR.N	R.RKGS#QITQQSTNQSR.N	RKGSQITQQSTNQSR	1	15	347	5.085	0	0	0	0	82.4	Jurkat_TiO2_1mg_3_f09350	Jurkat	TiO2	3	f09350
sp|Q9UQ35|SRRM2_HUMAN	R.SRT#S#PVTR.R	R.SRT#S#PVTR.R	SRTSPVTR	2	8	1986	19.843	1987	27.055	0	0	729.1	Jurkat_TiO2_1mg_3_f09350	Jurkat	TiO2	3	f09350
sp|Q02880|TOP2B_HUMAN	K.RKAS#GSENEGDYNPGRK.T	K.RKAS#GSENEGDYNPGRK.T	RKASGSENEGDYNPGRK	1	17	1550	4.085	0	0	0	0	146.7	Jurkat_TiO2_1mg_3_f09350	Jurkat	TiO2	3	f09350
sp|Q96S59|RANB9_HUMAN	R.CLGGRS#PK.S	R.CLGGRS#PK.S	CLGGRSPK	1	8	467	1000	0	0	0	0	1163.8	Jurkat_TiO2_1mg_3_f09350	Jurkat	TiO2	3	f09350
sp|Q13185|CBX3_HUMAN	K.RKS#LS#DS#ESDDSK.S	K.RKS#LS#DS#ESDDSK.S	RKSLSDSESDDSK	3	13	93	7.971	95	4.085	97	6.591	119.4	Jurkat_TiO2_1mg_3_f09350	Jurkat	TiO2	3	f09350
sp|P61927|RL37_HUMAN	K.RAAVAASSS#S.-	K.RAAVAASSS#S.-	RAAVAASSSS	1	10	96	24.437	0	0	0	0	1235	Jurkat_TiO2_1mg_3_f09350	Jurkat	TiO2	3	f09350
sp|Q9NYF8|BCLF1_HUMAN	K.NTPSQHSHSIQHS#PER.S	K.NTPSQHSHSIQHS#PER.S	NTPSQHSHSIQHSPER	1	16	268	58.551	0	0	0	0	9597.9	Jurkat_TiO2_1mg_3_f09350	Jurkat	TiO2	3	f09350
sp|Q16537|2A5E_HUMAN	K.RSQS#SSQFR.S	K.RSQS#SSQFR.S	RSQSSSQFR	1	9	32	6.591	0	0	0	0	2021.6	Jurkat_TiO2_1mg_3_f09350	Jurkat	TiO2	3	f09350
sp|Q14669|TRIPC_HUMAN	K.RSAS#PDYNR.T	K.RSAS#PDYNR.T	RSASPDYNR	1	9	77	30.835	0	0	0	0	476.5	Jurkat_TiO2_1mg_3_f09350	Jurkat	TiO2	3	f09350
sp|Q5VTL8|PR38B_HUMAN	K.HDRRRS#QS#IEQESQEK.Q	K.HDRRRS#QS#IEQESQEK.Q	HDRRRSQSIEQESQEK	2	16	527	55.37	529	60.358	0	0	1075.3	Jurkat_TiO2_1mg_3_f09350	Jurkat	TiO2	3	f09350
sp|P16104|H2AX_HUMAN	K.KTS#ATVGPK.A	K.KTS#ATVGPK.A	KTSATVGPK	1	9	122	24.437	0	0	0	0	2874.6	Jurkat_TiO2_1mg_3_f09350	Jurkat	TiO2	3	f09350
sp|Q9NYF8|BCLF1_HUMAN	K.NTPSQHSHS#IQHSPER.S	K.NT#PSQHSHSIQHSPER.S	NTPSQHSHSIQHSPER	1	16	264	6.591	0	0	0	0	1306.3	Jurkat_TiO2_1mg_3_f09350	Jurkat	TiO2	3	f09350
sp|Q02880|TOP2B_HUMAN	K.RKAS#GSENEGDYNPGRK.T	K.RKAS#GSENEGDYNPGRK.T	RKASGSENEGDYNPGRK	1	17	1550	11.015	0	0	0	0	41.9	Jurkat_TiO2_1mg_3_f09350	Jurkat	TiO2	3	f09350
sp|O75351|VPS4B_HUMAN	K.GNDS#DGEGESDDPEKK.K	K.GNDS#DGEGESDDPEKK.K	GNDSDGEGESDDPEKK	1	16	102	45.026	0	0	0	0	9623.6	Jurkat_TiO2_1mg_3_f09350	Jurkat	TiO2	3	f09350
sp|Q8NAV1|PR38A_HUMAN	K.PRRS#PTLR.Y	K.PRRS#PTLR.Y	PRRSPTLR	1	8	226	6.591	0	0	0	0	3701.9	Jurkat_TiO2_1mg_3_f09350	Jurkat	TiO2	3	f09350
sp|Q9NYF8|BCLF1_HUMAN	K.KETQS#PEQVK.S	K.KETQS#PEQVK.S	KETQSPEQVK	1	10	496	17.009	0	0	0	0	14278.5	Jurkat_TiO2_1mg_3_f09350	Jurkat	TiO2	3	f09350
sp|Q9BTT0|AN32E_HUMAN		R.DAEDDGEEEDD.-	DAEDDGEEEDD	0	11	0	0	0	0	0	0	627.9	Jurkat_TiO2_1mg_3_f09350	Jurkat	TiO2	3	f09350
sp|P46100|ATRX_HUMAN	K.DFDS#S#EDEKHS#KK.G	K.DFDS#S#EDEKHS#KK.G	DFDSSEDEKHSKK	3	13	849	1000	850	1000	856	1000	14	Jurkat_TiO2_1mg_3_f09350	Jurkat	TiO2	3	f09350
sp|Q12906|ILF3_HUMAN	K.RPM*EEDGEEKS#PSK.K	K.RPM*EEDGEEKS#PSK.K	RPMEEDGEEKSPSK	1	14	382	12.092	0	0	0	0	526.5	Jurkat_TiO2_1mg_3_f09350	Jurkat	TiO2	3	f09350
sp|P16949|STMN1_HUMAN		K.KLEAAEER.R	KLEAAEER	0	8	0	0	0	0	0	0	131	Jurkat_TiO2_1mg_3_f09350	Jurkat	TiO2	3	f09350
sp|Q14135|VGLL4_HUMAN	K.DGASSS#PESASR.R	K.DGASSS#PESASR.R	DGASSSPESASR	1	12	262	9.34	0	0	0	0	404	Jurkat_TiO2_1mg_3_f09350	Jurkat	TiO2	3	f09350
sp|Q9NRG0|CHRC1_HUMAN	K.EEKREEDEENDNDNES#DHDEADS.-	K.EEKREEDEENDNDNES#DHDEADS.-	EEKREEDEENDNDNESDHDEADS	1	23	124	1000	0	0	0	0	4738.8	Jurkat_TiO2_1mg_3_f09350	Jurkat	TiO2	3	f09350
sp|Q14677|EPN4_HUMAN	K.DREDS#PERCSDSDEEK.K	K.DREDS#PERCSDSDEEK.K	DREDSPERCSDSDEEK	1	16	227	3.359	0	0	0	0	100	Jurkat_TiO2_1mg_3_f09350	Jurkat	TiO2	3	f09350
sp|O75494|SRS10_HUMAN	R.S#RS#HS#DNDRFK.H	R.S#RS#HS#DNDRFK.H	SRSHSDNDRFK	3	11	156	1000	158	1000	160	1000	3331.9	Jurkat_TiO2_1mg_3_f09350	Jurkat	TiO2	3	f09350
sp|Q9BRD0|BUD13_HUMAN	R.IRHDSS#DTS#PPRR.A	R.IRHDSS#DTS#PPRR.A	IRHDSSDTSPPRR	2	13	185	0	188	4.085	0	0	816.6	Jurkat_TiO2_1mg_3_f09350	Jurkat	TiO2	3	f09350
sp|Q9UQ35|SRRM2_HUMAN	R.GRSECDS#S#PEPK.A	R.GRSECDS#S#PEPK.A	GRSECDSSPEPK	2	12	1482	31.275	1483	26.927	0	0	1670.7	Jurkat_TiO2_1mg_3_f09350	Jurkat	TiO2	3	f09350
sp|O60271|JIP4_HUMAN	R.SASQSS#LDK.L	R.SASQSS#LDK.L	SASQSSLDK	1	9	733	9.34	0	0	0	0	53.7	Jurkat_TiO2_1mg_3_f09350	Jurkat	TiO2	3	f09350
sp|Q6IQ23|PKHA7_HUMAN	K.STRHPS#GGSS#PPPR.N	K.STRHPSGGS#S#PPPR.N	STRHPSGGSSPPPR	2	14	481	12.431	485	6.591	0	0	72.2	Jurkat_TiO2_1mg_3_f09350	Jurkat	TiO2	3	f09350
sp|P06400|RB_HUMAN	K.M*NDS#MDTSNKEEK.-	K.M*NDS#MDTSNKEEK.-	MNDSMDTSNKEEK	1	13	919	11.015	0	0	0	0	36.4	Jurkat_TiO2_1mg_3_f09350	Jurkat	TiO2	3	f09350
sp|Q12906|ILF3_HUMAN	K.RPM*EEDGEEKSPS#K.K	K.RPM*EEDGEEKSPS#K.K	RPMEEDGEEKSPSK	1	14	384	6.591	0	0	0	0	57.8	Jurkat_TiO2_1mg_3_f09350	Jurkat	TiO2	3	f09350
sp|Q8IYB3|SRRM1_HUMAN	K.RRAS#PS#PPPK.R	K.RRAS#PS#PPPK.R	RRASPSPPPK	2	10	626	1000	628	1000	0	0	143900	Jurkat_TiO2_1mg_3_f09350	Jurkat	TiO2	3	f09350
sp|Q8IYB3|SRRM1_HUMAN	K.RRAS#PS#PPPK.R	K.RRAS#PS#PPPK.R	RRASPSPPPK	2	10	626	1000	628	1000	0	0	74265.5	Jurkat_TiO2_1mg_3_f09350	Jurkat	TiO2	3	f09350
sp|P28715|ERCC5_HUMAN	K.RGITNTLEES#S#S#LKR.K	K.RGITNTLEES#S#S#LKR.K	RGITNTLEESSSLKR	3	15	1067	6.039	1068	19.607	1069	19.607	175.1	Jurkat_TiO2_1mg_3_f09350	Jurkat	TiO2	3	f09350
sp|O95793|STAU1_HUMAN	K.SEEKT#PIK.K	K.SEEKT#PIK.K	SEEKTPIK	1	8	372	48.315	0	0	0	0	35.3	Jurkat_TiO2_1mg_3_f09350	Jurkat	TiO2	3	f09350
sp|Q9P2N6|KANL3_HUMAN	K.RHHPS#SPLPGSK.T	K.RHHPS#SPLPGSK.T	RHHPSSPLPGSK	1	12	632	6.591	0	0	0	0	2265.6	Jurkat_TiO2_1mg_3_f09350	Jurkat	TiO2	3	f09350
sp|P43243|MATR3_HUMAN	K.RSY#SPDGKES#PSDKK.S	K.RSYS#PDGKES#PSDKK.S	RSYSPDGKESPSDKK	2	15	597	6.591	604	4.085	0	0	92649.6	Jurkat_TiO2_1mg_3_f09350	Jurkat	TiO2	3	f09350
sp|Q9UKS7|IKZF2_HUMAN	K.RKQS#PAYMK.E	K.RKQS#PAYMK.E	RKQSPAYMK	1	9	433	24.243	0	0	0	0	1894.9	Jurkat_TiO2_1mg_3_f09350	Jurkat	TiO2	3	f09350
sp|Q9P2N6|KANL3_HUMAN	K.RHHPS#SPLPGSK.T	K.RHHPS#SPLPGSK.T	RHHPSSPLPGSK	1	12	632	0	0	0	0	0	264.8	Jurkat_TiO2_1mg_3_f09350	Jurkat	TiO2	3	f09350
sp|Q13029|PRDM2_HUMAN	R.NSS#PIR.M	R.NSS#PIR.M	NSSPIR	1	6	1577	24.437	0	0	0	0	118.4	Jurkat_TiO2_1mg_3_f09350	Jurkat	TiO2	3	f09350
sp|Q9H1E3|NUCKS_HUMAN	K.NSQEDS#EDSEDKDVK.T	K.NSQEDS#EDSEDKDVK.T	NSQEDSEDSEDKDVK	1	15	58	48.315	0	0	0	0	843.1	Jurkat_TiO2_1mg_3_f09350	Jurkat	TiO2	3	f09350
sp|P43243|MATR3_HUMAN	K.RSYS#PDGKES#PSDKK.S	K.RSYS#PDGKES#PSDKK.S	RSYSPDGKESPSDKK	2	15	598	9.34	604	17.009	0	0	18514.4	Jurkat_TiO2_1mg_3_f09350	Jurkat	TiO2	3	f09350
sp|Q9UBC3|DNM3B_HUMAN	R.TRSES#PAVR.T	R.TRSES#PAVR.T	TRSESPAVR	1	9	100	30.835	0	0	0	0	118.1	Jurkat_TiO2_1mg_3_f09350	Jurkat	TiO2	3	f09350
sp|Q03164|KMT2A_HUMAN	R.SEPRS#PSHSMR.T	R.SEPRS#PSHSMR.T	SEPRSPSHSMR	1	11	750	20.167	0	0	0	0	149.2	Jurkat_TiO2_1mg_3_f09350	Jurkat	TiO2	3	f09350
sp|Q9H1E3|NUCKS_HUMAN	K.NSQEDS#EDSEDKDVK.T	K.NSQEDS#EDSEDKDVK.T	NSQEDSEDSEDKDVK	1	15	58	33.657	0	0	0	0	1175.6	Jurkat_TiO2_1mg_3_f09350	Jurkat	TiO2	3	f09350
sp|Q12906|ILF3_HUMAN	K.RPM*EEDGEEKS#PSK.K	K.RPM*EEDGEEKS#PSK.K	RPMEEDGEEKSPSK	1	14	382	4.54	0	0	0	0	526.5	Jurkat_TiO2_1mg_3_f09350	Jurkat	TiO2	3	f09350
sp|Q9UQ35|SRRM2_HUMAN	R.GRSECDS#S#PEPK.A	R.GRSECDS#S#PEPK.A	GRSECDSSPEPK	2	12	1482	36.556	1483	39.663	0	0	399.2	Jurkat_TiO2_1mg_3_f09350	Jurkat	TiO2	3	f09350
sp|P35568|IRS1_HUMAN	K.RTHSAGTS#PTITHQK.T	K.RTHSAGTS#PTITHQK.T	RTHSAGTSPTITHQK	1	15	531	6.591	0	0	0	0	42.7	Jurkat_TiO2_1mg_3_f09350	Jurkat	TiO2	3	f09350
sp|Q8NI27|THOC2_HUMAN	K.KEKT#PATTPEAR.V	K.KEKT#PATTPEAR.V	KEKTPATTPEAR	1	12	1285	23.624	0	0	0	0	34.6	Jurkat_TiO2_1mg_3_f09350	Jurkat	TiO2	3	f09350
sp|Q9NTI5|PDS5B_HUMAN	R.GRPS#KT#PS#PSQPKK.N	R.GRPS#KT#PS#PSQPKK.N	GRPSKTPSPSQPKK	3	14	1379	26.105	1381	27.121	1383	4.085	41.3	Jurkat_TiO2_1mg_3_f09350	Jurkat	TiO2	3	f09350
sp|Q13428|TCOF_HUMAN	K.RKLS#GDQPAAR.T	K.RKLS#GDQPAAR.T	RKLSGDQPAAR	1	11	1350	1000	0	0	0	0	32817.2	Jurkat_TiO2_1mg_3_f09350	Jurkat	TiO2	3	f09350
sp|Q9NRG0|CHRC1_HUMAN	K.REEDEENDNDNES#DHDEADS.-	K.REEDEENDNDNES#DHDEADS.-	REEDEENDNDNESDHDEADS	1	20	124	1000	0	0	0	0	18	Jurkat_TiO2_1mg_3_f09350	Jurkat	TiO2	3	f09350
sp|Q96T37|RBM15_HUMAN	R.GGS#REYDTGGGSSSSR.L	R.GGSREY#DTGGGSSSSR.L	GGSREYDTGGGSSSSR	1	16	109	3.065	0	0	0	0	770.3	Jurkat_TiO2_1mg_3_f09350	Jurkat	TiO2	3	f09350
sp|Q13428|TCOF_HUMAN	K.RKLS#GDQPAAR.T	K.RKLS#GDQPAAR.T	RKLSGDQPAAR	1	11	1350	1000	0	0	0	0	10137	Jurkat_TiO2_1mg_3_f09350	Jurkat	TiO2	3	f09350
sp|Q9NYZ3|GTSE1_HUMAN	K.KS#PTSLK.R	K.KS#PTSLK.R	KSPTSLK	1	7	138	24.243	0	0	0	0	368	Jurkat_TiO2_1mg_3_f09350	Jurkat	TiO2	3	f09350
sp|Q13595|TRA2A_HUMAN	R.S#RS#HS#PMSNR.R	R.S#RS#HS#PMSNR.R	SRSHSPMSNR	3	10	96	54.586	98	38.189	100	24.243	5539	Jurkat_TiO2_1mg_3_f09350	Jurkat	TiO2	3	f09350
sp|Q12906|ILF3_HUMAN	K.RPM*EEDGEEKS#PSK.K	K.RPM*EEDGEEKS#PSK.K	RPMEEDGEEKSPSK	1	14	382	22.011	0	0	0	0	526.5	Jurkat_TiO2_1mg_3_f09350	Jurkat	TiO2	3	f09350
sp|P26358|DNMT1_HUMAN		K.SDESIKEEDKDQDEK.R	SDESIKEEDKDQDEK	0	15	0	0	0	0	0	0	24.5	Jurkat_TiO2_1mg_3_f09350	Jurkat	TiO2	3	f09350
sp|Q9UKV3|ACINU_HUMAN	K.ERTST#SSSSVQAR.R	K.ERT#STSSSSVQAR.R	ERTSTSSSSVQAR	1	13	699	4.085	0	0	0	0	41.2	Jurkat_TiO2_1mg_3_f09350	Jurkat	TiO2	3	f09350
sp|Q14103|HNRPD_HUMAN	K.NEEDEGHSNS#SPRHSEAATAQR.E	K.NEEDEGHSNS#SPRHSEAATAQR.E	NEEDEGHSNSSPRHSEAATAQR	1	22	82	4.085	0	0	0	0	3925.8	Jurkat_TiO2_1mg_3_f09350	Jurkat	TiO2	3	f09350
sp|Q96ST2|IWS1_HUMAN	K.FHSS#DS#EEEEHK.K	K.FHSS#DS#EEEEHK.K	FHSSDSEEEEHK	2	12	363	24.437	365	53.534	0	0	367	Jurkat_TiO2_1mg_3_f09350	Jurkat	TiO2	3	f09350
sp|Q9H9J4|UBP42_HUMAN	R.HAPEHHPGHGDRLS#PGERR.S	R.HAPEHHPGHGDRLS#PGERR.S	HAPEHHPGHGDRLSPGERR	1	19	1007	1000	0	0	0	0	3.2732	Jurkat_TiO2_1mg_3_f09350	Jurkat	TiO2	3	f09350
sp|Q00341|VIGLN_HUMAN	K.DCDPGS#PR.R	K.DCDPGS#PR.R	DCDPGSPR	1	8	944	1000	0	0	0	0	1884.7	Jurkat_TiO2_1mg_3_f09350	Jurkat	TiO2	3	f09350
sp|Q5T200|ZC3HD_HUMAN	R.RKRT#PS#PSYQR.T	R.RKRT#PS#PSYQR.T	RKRTPSPSYQR	2	11	354	11.721	356	4.085	0	0	1705	Jurkat_TiO2_1mg_3_f09350	Jurkat	TiO2	3	f09350
sp|O75528|TADA3_HUMAN	K.ESGADGASTS#PR.N	K.ESGADGASTS#PR.N	ESGADGASTSPR	1	12	298	9.34	0	0	0	0	323.7	Jurkat_TiO2_1mg_3_f09350	Jurkat	TiO2	3	f09350
sp|Q5T8P6|RBM26_HUMAN	R.RLNHS#PPQSSSR.Y	R.RLNHS#PPQSSSR.Y	RLNHSPPQSSSR	1	12	127	20.167	0	0	0	0	2219.7	Jurkat_TiO2_1mg_3_f09350	Jurkat	TiO2	3	f09350
sp|Q5VT06|CE350_HUMAN	K.SAGESKLDS#HSDDDTK.D	K.SAGESKLDSHS#DDDTK.D	SAGESKLDSHSDDDTK	1	16	1805	11.015	0	0	0	0	41.6	Jurkat_TiO2_1mg_3_f09350	Jurkat	TiO2	3	f09350
sp|Q9H4E7|DEFI6_HUMAN	R.TPS#PNSNEQQK.S	R.TPS#PNSNEQQK.S	TPSPNSNEQQK	1	11	597	36.655	0	0	0	0	944.6	Jurkat_TiO2_1mg_3_f09350	Jurkat	TiO2	3	f09350
sp|P62753|RS6_HUMAN		K.NKEEAAEYAK.L	NKEEAAEYAK	0	10	0	0	0	0	0	0	18	Jurkat_TiO2_1mg_3_f09350	Jurkat	TiO2	3	f09350
sp|Q2PPJ7|RGPA2_HUMAN	K.RSSS#WGR.T	K.RSSS#WGR.T	RSSSWGR	1	7	480	0	0	0	0	0	276.6	Jurkat_TiO2_1mg_3_f09350	Jurkat	TiO2	3	f09350
sp|Q14103|HNRPD_HUMAN	K.NEEDEGHSNSS#PRHSEAATAQR.E	K.NEEDEGHSNSS#PRHSEAATAQR.E	NEEDEGHSNSSPRHSEAATAQR	1	22	83	2.806	0	0	0	0	2342.4	Jurkat_TiO2_1mg_3_f09350	Jurkat	TiO2	3	f09350
sp|Q6VMQ6|MCAF1_HUMAN	K.RSKS#EDMDNVQSK.R	K.RSKS#EDMDNVQSK.R	RSKSEDMDNVQSK	1	13	559	22.011	0	0	0	0	645.3	Jurkat_TiO2_1mg_3_f09350	Jurkat	TiO2	3	f09350
sp|P25205|MCM3_HUMAN	K.RSEDES#ETEDEEEK.S	K.RSEDES#ETEDEEEK.S	RSEDESETEDEEEK	1	14	672	6.591	0	0	0	0	511.3	Jurkat_TiO2_1mg_3_f09350	Jurkat	TiO2	3	f09350
sp|Q8IYB3|SRRM1_HUMAN	R.RRRT#PT#PPPR.R	R.RRRT#PT#PPPR.R	RRRTPTPPPR	2	10	572	1000	574	1000	0	0	78620.3	Jurkat_TiO2_1mg_3_f09350	Jurkat	TiO2	3	f09350
sp|Q6VMQ6|MCAF1_HUMAN	K.RSKS#EDMDNVQSK.R	K.RSKS#EDMDNVQSK.R	RSKSEDMDNVQSK	1	13	559	6.591	0	0	0	0	144.7	Jurkat_TiO2_1mg_3_f09350	Jurkat	TiO2	3	f09350
sp|Q96ST2|IWS1_HUMAN	R.RMNS#TGGQTPR.R	R.RMNS#TGGQTPR.R	RMNSTGGQTPR	1	11	720	9.34	0	0	0	0	197.7	Jurkat_TiO2_1mg_3_f09350	Jurkat	TiO2	3	f09350
sp|P25205|MCM3_HUMAN	K.RSEDES#ETEDEEEK.S	K.RSEDES#ETEDEEEK.S	RSEDESETEDEEEK	1	14	672	6.454	0	0	0	0	284.1	Jurkat_TiO2_1mg_3_f09350	Jurkat	TiO2	3	f09350
sp|P25205|MCM3_HUMAN	K.RSEDES#ET#EDEEEK.S	K.RSEDES#ET#EDEEEK.S	RSEDESETEDEEEK	2	14	672	12.092	674	8.594	0	0	30.5	Jurkat_TiO2_1mg_3_f09350	Jurkat	TiO2	3	f09350
sp|P07900|HS90A_HUMAN	K.ERDKEVS#DDEAEEK.E	K.ERDKEVS#DDEAEEK.E	ERDKEVSDDEAEEK	1	14	231	1000	0	0	0	0	225500	Jurkat_TiO2_1mg_3_f09350	Jurkat	TiO2	3	f09350
sp|P07900|HS90A_HUMAN	K.ERDKEVS#DDEAEEK.E	K.ERDKEVS#DDEAEEK.E	ERDKEVSDDEAEEK	1	14	231	1000	0	0	0	0	100700	Jurkat_TiO2_1mg_3_f09350	Jurkat	TiO2	3	f09350
sp|Q9UQ35|SRRM2_HUMAN	R.S#RS#RAS#PVSR.R	R.S#RS#RAS#PVSR.R	SRSRASPVSR	3	10	1911	49.312	1913	33.657	1916	37.54	3951.3	Jurkat_TiO2_1mg_3_f09350	Jurkat	TiO2	3	f09350
sp|Q9NRG0|CHRC1_HUMAN	K.REEDEENDNDNES#DHDEADS.-	K.REEDEENDNDNES#DHDEADS.-	REEDEENDNDNESDHDEADS	1	20	124	1000	0	0	0	0	2124.6	Jurkat_TiO2_1mg_3_f09350	Jurkat	TiO2	3	f09350
sp|Q13427|PPIG_HUMAN	R.AQSRS#RECDITK.G	R.AQSRS#RECDITK.G	AQSRSRECDITK	1	12	546	6.591	0	0	0	0	14.5	Jurkat_TiO2_1mg_3_f09350	Jurkat	TiO2	3	f09350
sp|Q01831|XPC_HUMAN	K.RSKPS#S#S#EEDEGPGDKQEK.A	K.RSKPS#S#S#EEDEGPGDKQEK.A	RSKPSSSEEDEGPGDKQEK	3	19	397	28.934	398	22.237	399	17.848	50.7	Jurkat_TiO2_1mg_3_f09350	Jurkat	TiO2	3	f09350
sp|P25205|MCM3_HUMAN	K.RSEDES#ET#EDEEEK.S	K.RSEDES#ET#EDEEEK.S	RSEDESETEDEEEK	2	14	672	34.073	674	25.174	0	0	19.1	Jurkat_TiO2_1mg_3_f09350	Jurkat	TiO2	3	f09350
sp|Q01831|XPC_HUMAN	K.RSKPS#S#S#EEDEGPGDKQEK.A	K.RSKPS#S#S#EEDEGPGDKQEK.A	RSKPSSSEEDEGPGDKQEK	3	19	397	40.978	398	31.769	399	34.892	50.7	Jurkat_TiO2_1mg_3_f09350	Jurkat	TiO2	3	f09350
sp|Q9UQ35|SRRM2_HUMAN	R.GGS#GYHS#RS#PARQESSR.T	R.GGS#GYHS#RS#PARQESSR.T	GGSGYHSRSPARQESSR	3	17	1818	5.085	1822	11.015	1824	11.721	8111.3	Jurkat_TiO2_1mg_3_f09350	Jurkat	TiO2	3	f09350
sp|Q9HC44|GPBL1_HUMAN	R.HDS#VDSGVSK.G	R.HDS#VDSGVSK.G	HDSVDSGVSK	1	10	76	24.243	0	0	0	0	131.6	Jurkat_TiO2_1mg_3_f09350	Jurkat	TiO2	3	f09350
sp|Q9BU76|MMTA2_HUMAN	R.WHDRGS#EA.-	R.WHDRGS#EA.-	WHDRGSEA	1	8	261	1000	0	0	0	0	299.2	Jurkat_TiO2_1mg_3_f09350	Jurkat	TiO2	3	f09350
sp|Q6PD62|CTR9_HUMAN	R.HPKGEEGS#DDDETENGPKPK.K	R.HPKGEEGS#DDDETENGPKPK.K	HPKGEEGSDDDETENGPKPK	1	20	970	49.59	0	0	0	0	4392.6	Jurkat_TiO2_1mg_3_f09350	Jurkat	TiO2	3	f09350
sp|P07900|HS90A_HUMAN	K.ERDKEVS#DDEAEEK.E	K.ERDKEVS#DDEAEEK.E	ERDKEVSDDEAEEK	1	14	231	1000	0	0	0	0	1024.3	Jurkat_TiO2_1mg_3_f09350	Jurkat	TiO2	3	f09350
sp|Q96T58|MINT_HUMAN	R.TGGS#PSVR.H	R.TGGS#PSVR.H	TGGSPSVR	1	8	1261	17.009	0	0	0	0	763.1	Jurkat_TiO2_1mg_3_f09350	Jurkat	TiO2	3	f09350
sp|Q9P270|SLAI2_HUMAN	R.NSPRPSPKQS#PRNS#PR.S	R.NSPRPS#PKQSPRNS#PR.S	NSPRPSPKQSPRNSPR	2	16	357	11.721	361	26.045	0	0	270.5	Jurkat_TiO2_1mg_3_f09350	Jurkat	TiO2	3	f09350
sp|Q8NI27|THOC2_HUMAN	K.KEKT#PAT#TPEAR.V	K.KEKT#PAT#TPEAR.V	KEKTPATTPEAR	2	12	1285	58.551	1288	17.009	0	0	1204.5	Jurkat_TiO2_1mg_3_f09350	Jurkat	TiO2	3	f09350
sp|Q9P2M4|TBC14_HUMAN	K.GS#PSLRH.-	K.GS#PSLRH.-	GSPSLRH	1	7	688	30.835	0	0	0	0	1137.2	Jurkat_TiO2_1mg_3_f09350	Jurkat	TiO2	3	f09350
sp|Q8NI27|THOC2_HUMAN	K.KEKTPAT#T#PEAR.V	K.KEKT#PATT#PEAR.V	KEKTPATTPEAR	2	12	1288	24.243	1289	31.275	0	0	496.7	Jurkat_TiO2_1mg_3_f09350	Jurkat	TiO2	3	f09350
sp|O75400|PR40A_HUMAN	R.HKS#DS#PESDAEREK.D	R.HKS#DS#PESDAEREK.D	HKSDSPESDAEREK	2	14	883	4.691	885	2.806	0	0	110.9	Jurkat_TiO2_1mg_3_f09350	Jurkat	TiO2	3	f09350
sp|Q9Y3T9|NOC2L_HUMAN	R.SPDKPGGS#PSASR.R	R.SPDKPGGS#PSASR.R	SPDKPGGSPSASR	1	13	56	20.167	0	0	0	0	1128.6	Jurkat_TiO2_1mg_3_f09350	Jurkat	TiO2	3	f09350
sp|Q5VZK9|CARL1_HUMAN	K.ERDGQSS#PQPSPR.T	K.ERDGQSS#PQPSPR.T	ERDGQSSPQPSPR	1	13	1315	6.591	0	0	0	0	95.3	Jurkat_TiO2_1mg_3_f09350	Jurkat	TiO2	3	f09350
sp|P42166|LAP2A_HUMAN	R.QNGSNDSDRYS#DNEEGK.K	R.QNGSNDSDRYS#DNEEGK.K	QNGSNDSDRYSDNEEGK	1	17	184	0	0	0	0	0	793.6	Jurkat_TiO2_1mg_3_f09350	Jurkat	TiO2	3	f09350
sp|Q9BRD0|BUD13_HUMAN	K.DRHDT#PDPS#PRR.A	K.DRHDT#PDPS#PRR.A	DRHDTPDPSPRR	2	12	147	1000	151	1000	0	0	2741.3	Jurkat_TiO2_1mg_3_f09350	Jurkat	TiO2	3	f09350
sp|Q9NYF8|BCLF1_HUMAN	K.S#PEIHR.R	K.S#PEIHR.R	SPEIHR	1	6	648	1000	0	0	0	0	43967.6	Jurkat_TiO2_1mg_3_f09350	Jurkat	TiO2	3	f09350
sp|O00425|IF2B3_HUMAN	R.GSS#RQGS#PGSVSK.Q	R.GSS#RQGS#PGSVSK.Q	GSSRQGSPGSVSK	2	13	180	0	184	37.54	0	0	5966	Jurkat_TiO2_1mg_3_f09350	Jurkat	TiO2	3	f09350
sp|Q15555|MARE2_HUMAN	K.PGSTPSRPSS#AK.R	K.PGSTPSRPSS#AK.R	PGSTPSRPSSAK	1	12	223	24.437	0	0	0	0	827.5	Jurkat_TiO2_1mg_3_f09350	Jurkat	TiO2	3	f09350
sp|P42166|LAP2A_HUMAN	R.QNGS#NDSDRYSDNEEGK.K	R.QNGS#NDSDRYSDNEEGK.K	QNGSNDSDRYSDNEEGK	1	17	177	20.985	0	0	0	0	208.1	Jurkat_TiO2_1mg_3_f09350	Jurkat	TiO2	3	f09350
sp|P23588|IF4B_HUMAN	R.SQSS#DTEQQS#PTSGGGK.V	R.SQSS#DTEQQS#PTSGGGK.V	SQSSDTEQQSPTSGGGK	2	17	498	24.437	504	17.009	0	0	1817	Jurkat_TiO2_1mg_3_f09350	Jurkat	TiO2	3	f09350
sp|Q5VTL8|PR38B_HUMAN	R.S#GS#QGRTDSVEK.S	R.S#GS#QGRTDSVEK.S	SGSQGRTDSVEK	2	12	473	16.062	475	20.167	0	0	1101.8	Jurkat_TiO2_1mg_3_f09350	Jurkat	TiO2	3	f09350
sp|Q9Y285|SYFA_HUMAN	K.RTHS#QGGYGSQGYK.Y	K.RTHS#QGGYGSQGYK.Y	RTHSQGGYGSQGYK	1	14	301	48.315	0	0	0	0	153.9	Jurkat_TiO2_1mg_3_f09350	Jurkat	TiO2	3	f09350
sp|Q86UE8|TLK2_HUMAN	K.RKAEPYETS#QGK.G	K.RKAEPYETS#QGK.G	RKAEPYETSQGK	1	12	73	9.34	0	0	0	0	198.9	Jurkat_TiO2_1mg_3_f09350	Jurkat	TiO2	3	f09350
sp|O14681|EI24_HUMAN	R.AQS#IER.K	R.AQS#IER.K	AQSIER	1	6	56	1000	0	0	0	0	673.7	Jurkat_TiO2_1mg_3_f09350	Jurkat	TiO2	3	f09350
sp|P63208|SKP1_HUMAN	K.GKT#PEEIRK.T	K.GKT#PEEIRK.T	GKTPEEIRK	1	9	131	1000	0	0	0	0	6541	Jurkat_TiO2_1mg_3_f09350	Jurkat	TiO2	3	f09350
sp|P42166|LAP2A_HUMAN	R.QNGSNDSDRYS#DNEEGK.K	R.QNGSNDSDRYS#DNEEGK.K	QNGSNDSDRYSDNEEGK	1	17	184	0	0	0	0	0	208.1	Jurkat_TiO2_1mg_3_f09350	Jurkat	TiO2	3	f09350
sp|Q9BRD0|BUD13_HUMAN	K.DRHDT#PDPS#PRR.A	K.DRHDT#PDPS#PRR.A	DRHDTPDPSPRR	2	12	147	1000	151	1000	0	0	473.1	Jurkat_TiO2_1mg_3_f09350	Jurkat	TiO2	3	f09350
sp|Q12906|ILF3_HUMAN	K.RPMEEDGEEKS#PSK.K	K.RPMEEDGEEKS#PSK.K	RPMEEDGEEKSPSK	1	14	382	12.092	0	0	0	0	63442.2	Jurkat_TiO2_1mg_3_f09350	Jurkat	TiO2	3	f09350
sp|Q9UN37|VPS4A_HUMAN	K.ENQSEGKGS#DS#DSEGDNPEK.K	K.ENQSEGKGS#DS#DSEGDNPEK.K	ENQSEGKGSDSDSEGDNPEK	2	20	95	6.039	97	0	0	0	238.3	Jurkat_TiO2_1mg_3_f09350	Jurkat	TiO2	3	f09350
sp|Q15648|MED1_HUMAN	K.HDGGS#PSIK.A	K.HDGGS#PSIK.A	HDGGSPSIK	1	9	1401	17.009	0	0	0	0	2301.6	Jurkat_TiO2_1mg_3_f09350	Jurkat	TiO2	3	f09350
sp|O60381|HBP1_HUMAN	K.NHSSGTVSATS#PNK.C	K.NHSSGTVSATS#PNK.C	NHSSGTVSATSPNK	1	14	430	24.437	0	0	0	0	87.7	Jurkat_TiO2_1mg_3_f09350	Jurkat	TiO2	3	f09350
sp|Q12906|ILF3_HUMAN	K.RPMEEDGEEKS#PSK.K	K.RPMEEDGEEKS#PSK.K	RPMEEDGEEKSPSK	1	14	382	7.71	0	0	0	0	24543.2	Jurkat_TiO2_1mg_3_f09350	Jurkat	TiO2	3	f09350
sp|Q9BRD0|BUD13_HUMAN	K.DRHDT#PDPS#PRR.A	K.DRHDT#PDPS#PRR.A	DRHDTPDPSPRR	2	12	147	1000	151	1000	0	0	473.1	Jurkat_TiO2_1mg_3_f09350	Jurkat	TiO2	3	f09350
sp|Q8IYB3|SRRM1_HUMAN	R.RRS#PS#PAPPPRR.R	R.RRS#PS#PAPPPRR.R	RRSPSPAPPPRR	2	12	560	1000	562	1000	0	0	34054.9	Jurkat_TiO2_1mg_3_f09350	Jurkat	TiO2	3	f09350
sp|Q9UQ35|SRRM2_HUMAN	R.HSCSGS#SPPRVK.S	R.HSCSGS#SPPRVK.S	HSCSGSSPPRVK	1	12	894	0	0	0	0	0	9806.9	Jurkat_TiO2_1mg_3_f09350	Jurkat	TiO2	3	f09350
sp|Q14839|CHD4_HUMAN	K.KM*S#QPGS#PSPK.T	K.KM*S#QPGS#PSPK.T	KMSQPGSPSPK	2	11	1531	33.657	1535	6.591	0	0	1752.3	Jurkat_TiO2_1mg_3_f09350	Jurkat	TiO2	3	f09350
sp|Q8TAQ2|SMRC2_HUMAN	K.RKRSPS#PS#PTPEAK.K	K.RKRS#PS#PSPTPEAK.K	RKRSPSPSPTPEAK	2	14	304	11.721	306	4.085	0	0	16258.5	Jurkat_TiO2_1mg_3_f09350	Jurkat	TiO2	3	f09350
sp|Q9UQ35|SRRM2_HUMAN	R.HSCSGS#SPPRVK.S	R.HSCSGS#SPPRVK.S	HSCSGSSPPRVK	1	12	894	0	0	0	0	0	154.5	Jurkat_TiO2_1mg_3_f09350	Jurkat	TiO2	3	f09350
sp|Q5T200|ZC3HD_HUMAN	K.RYRNEGS#PS#PRQS#PK.R	K.RYRNEGS#PS#PRQS#PK.R	RYRNEGSPSPRQSPK	3	15	831	51.004	833	51.809	837	78.616	912	Jurkat_TiO2_1mg_3_f09350	Jurkat	TiO2	3	f09350
sp|Q8TAQ2|SMRC2_HUMAN	K.RKRSPS#PS#PTPEAK.K	K.RKRSPS#PS#PTPEAK.K	RKRSPSPSPTPEAK	2	14	304	17.009	306	6.591	0	0	4183.4	Jurkat_TiO2_1mg_3_f09350	Jurkat	TiO2	3	f09350
sp|Q9UKJ3|GPTC8_HUMAN	K.DHAEEGTS#EDGTKPDEK.S	K.DHAEEGTS#EDGTKPDEK.S	DHAEEGTSEDGTKPDEK	1	17	328	6.591	0	0	0	0	63.9	Jurkat_TiO2_1mg_3_f09350	Jurkat	TiO2	3	f09350
sp|Q14978|NOLC1_HUMAN	K.VAGGAAPSKPAS#AKK.G	K.VAGGAAPSKPAS#AKK.G	VAGGAAPSKPASAKK	1	15	508	36.556	0	0	0	0	1119.5	Jurkat_TiO2_1mg_3_f09350	Jurkat	TiO2	3	f09350
sp|Q8TAQ2|SMRC2_HUMAN	K.RKRSPS#PS#PTPEAK.K	K.RKRSPS#PS#PTPEAK.K	RKRSPSPSPTPEAK	2	14	304	18.805	306	11.015	0	0	1169.3	Jurkat_TiO2_1mg_3_f09350	Jurkat	TiO2	3	f09350
sp|Q15435|PP1R7_HUMAN	R.RVES#EES#GDEEGK.K	R.RVES#EES#GDEEGK.K	RVESEESGDEEGK	2	13	24	1000	27	1000	0	0	1223.9	Jurkat_TiO2_1mg_3_f09350	Jurkat	TiO2	3	f09350
sp|Q6PD62|CTR9_HUMAN	K.GEEGS#DDDETENGPKPKK.R	K.GEEGS#DDDETENGPKPKK.R	GEEGSDDDETENGPKPKK	1	18	970	4.691	0	0	0	0	231.1	Jurkat_TiO2_1mg_3_f09350	Jurkat	TiO2	3	f09350
sp|P35579|MYH9_HUMAN		R.DLQGRDEQSEEK.K	DLQGRDEQSEEK	0	12	0	0	0	0	0	0	83.8	Jurkat_TiO2_1mg_3_f09350	Jurkat	TiO2	3	f09350
sp|Q14669|TRIPC_HUMAN	K.ALQHTES#PSETNKPHSK.S	K.ALQHTESPS#ETNKPHSK.S	ALQHTESPSETNKPHSK	1	17	100	4.085	0	0	0	0	60.4	Jurkat_TiO2_1mg_3_f09350	Jurkat	TiO2	3	f09350
sp|Q14669|TRIPC_HUMAN	R.AQTAPTKTS#PR.N	R.AQTAPTKTS#PR.N	AQTAPTKTSPR	1	11	1427	24.437	0	0	0	0	184	Jurkat_TiO2_1mg_3_f09350	Jurkat	TiO2	3	f09350
sp|Q9Y618|NCOR2_HUMAN	K.SRS#PAPPADK.E	K.SRS#PAPPADK.E	SRSPAPPADK	1	10	1025	7.71	0	0	0	0	1447.3	Jurkat_TiO2_1mg_3_f09350	Jurkat	TiO2	3	f09350
sp|Q14669|TRIPC_HUMAN	K.ALQHTES#PSETNKPHSK.S	K.ALQHTES#PSETNKPHSK.S	ALQHTESPSETNKPHSK	1	17	100	11.015	0	0	0	0	225.6	Jurkat_TiO2_1mg_3_f09350	Jurkat	TiO2	3	f09350
sp|Q9P2M4|TBC14_HUMAN	K.AGRPSKPPS#PK.Q	K.AGRPSKPPS#PK.Q	AGRPSKPPSPK	1	11	295	71.067	0	0	0	0	554.2	Jurkat_TiO2_1mg_3_f09350	Jurkat	TiO2	3	f09350
sp|Q9H1E3|NUCKS_HUMAN	R.SGKNS#QEDS#EDS#EDKDVK.T	R.SGKNS#QEDS#EDS#EDKDVK.T	SGKNSQEDSEDSEDKDVK	3	18	54	11.015	58	7.649	61	17.167	1931.7	Jurkat_TiO2_1mg_3_f09350	Jurkat	TiO2	3	f09350
sp|P08575|PTPRC_HUMAN	K.ESEHDSDESSDDDS#DSEEPSK.Y	K.ESEHDSDESSDDDS#DSEEPSK.Y	ESEHDSDESSDDDSDSEEPSK	1	21	1007	4.085	0	0	0	0	51	Jurkat_TiO2_1mg_3_f09350	Jurkat	TiO2	3	f09350
sp|Q15154|PCM1_HUMAN	R.DQHLNNSSSS#PQR.S	R.DQHLNNSSSS#PQR.S	DQHLNNSSSSPQR	1	13	431	9.34	0	0	0	0	1619.1	Jurkat_TiO2_1mg_3_f09350	Jurkat	TiO2	3	f09350
sp|P49792|RBP2_HUMAN	R.SST#PRES#PCGK.I	R.SST#PRES#PCGK.I	SSTPRESPCGK	2	11	2458	12.218	2462	38.189	0	0	319.8	Jurkat_TiO2_1mg_3_f09350	Jurkat	TiO2	3	f09350
sp|Q9UQ35|SRRM2_HUMAN	R.RRPS#PQPS#PR.D	R.RRPS#PQPS#PR.D	RRPSPQPSPR	2	10	2702	1000	2706	1000	0	0	7749.8	Jurkat_TiO2_1mg_3_f09350	Jurkat	TiO2	3	f09350
sp|Q8IYB3|SRRM1_HUMAN	K.RES#PS#PAPK.P	K.RES#PS#PAPK.P	RESPSPAPK	2	9	450	1000	452	1000	0	0	14587.3	Jurkat_TiO2_1mg_3_f09350	Jurkat	TiO2	3	f09350
sp|Q9UQ35|SRRM2_HUMAN	R.RRPS#PQPS#PR.D	R.RRPS#PQPS#PR.D	RRPSPQPSPR	2	10	2702	1000	2706	1000	0	0	13110.7	Jurkat_TiO2_1mg_3_f09350	Jurkat	TiO2	3	f09350
sp|Q12906|ILF3_HUMAN	K.GEDS#AEETEAK.P	K.GEDS#AEETEAK.P	GEDSAEETEAK	1	11	482	11.015	0	0	0	0	525.4	Jurkat_TiO2_1mg_3_f09350	Jurkat	TiO2	3	f09350
sp|Q9H1E3|NUCKS_HUMAN	R.SGKNS#QEDS#EDS#EDKDVK.T	R.SGKNS#QEDS#EDS#EDKDVK.T	SGKNSQEDSEDSEDKDVK	3	18	54	11.015	58	26.105	61	36.684	1931.7	Jurkat_TiO2_1mg_3_f09350	Jurkat	TiO2	3	f09350
sp|Q9NTI5|PDS5B_HUMAN	R.GRPSKT#PS#PSQPK.K	R.GRPSKT#PS#PSQPK.K	GRPSKTPSPSQPK	2	13	1381	11.015	1383	4.085	0	0	2191.1	Jurkat_TiO2_1mg_3_f09350	Jurkat	TiO2	3	f09350
sp|Q9UKV3|ACINU_HUMAN	K.SSSISEEKGDS#DDEKPRK.G	K.SSSISEEKGDS#DDEKPRK.G	SSSISEEKGDSDDEKPRK	1	18	216	23.624	0	0	0	0	1499.8	Jurkat_TiO2_1mg_3_f09350	Jurkat	TiO2	3	f09350
sp|Q9BRD0|BUD13_HUMAN	R.HFRHDT#PDSS#PR.R	R.HFRHDT#PDSS#PR.R	HFRHDTPDSSPR	2	12	123	45.026	127	0	0	0	4739.2	Jurkat_TiO2_1mg_3_f09350	Jurkat	TiO2	3	f09350
sp|Q9BRD0|BUD13_HUMAN	R.HFRHDT#PDSS#PR.R	R.HFRHDT#PDSS#PR.R	HFRHDTPDSSPR	2	12	123	24.243	127	24.437	0	0	1790.7	Jurkat_TiO2_1mg_3_f09350	Jurkat	TiO2	3	f09350
sp|Q9H1E3|NUCKS_HUMAN	R.SGKNS#QEDS#EDS#EDKDVK.T	R.SGKNS#QEDS#EDS#EDKDVK.T	SGKNSQEDSEDSEDKDVK	3	18	54	19.843	58	35.777	61	34.892	1015.6	Jurkat_TiO2_1mg_3_f09350	Jurkat	TiO2	3	f09350
sp|Q5VT52|RPRD2_HUMAN	R.GNEPGSDRS#PS#PSK.N	R.GNEPGSDRS#PS#PSK.N	GNEPGSDRSPSPSK	2	14	928	24.243	930	30.835	0	0	1593.3	Jurkat_TiO2_1mg_3_f09350	Jurkat	TiO2	3	f09350
sp|Q9NTI5|PDS5B_HUMAN	R.GRPSKT#PS#PSQPK.K	R.GRPSKT#PS#PSQPK.K	GRPSKTPSPSQPK	2	13	1381	17.009	1383	30.835	0	0	984.5	Jurkat_TiO2_1mg_3_f09350	Jurkat	TiO2	3	f09350
sp|Q5T200|ZC3HD_HUMAN	R.DQRPS#SPIRHQGR.N	R.DQRPS#SPIRHQGR.N	DQRPSSPIRHQGR	1	13	642	6.591	0	0	0	0	3152.6	Jurkat_TiO2_1mg_3_f09350	Jurkat	TiO2	3	f09350
sp|Q92576|PHF3_HUMAN	R.DKVEENS#VRSPRK.S	R.DKVEENS#VRSPRK.S	DKVEENSVRSPRK	1	13	122	23.624	0	0	0	0	1684.4	Jurkat_TiO2_1mg_3_f09350	Jurkat	TiO2	3	f09350
sp|Q9Y4K1|AIM1_HUMAN	R.APAKES#PPK.R	R.APAKES#PPK.R	APAKESPPK	1	9	132	1000	0	0	0	0	614.3	Jurkat_TiO2_1mg_3_f09350	Jurkat	TiO2	3	f09350
sp|Q7Z4V5|HDGR2_HUMAN	R.KRS#EGFSM*DR.K	R.KRS#EGFSM*DR.K	KRSEGFSMDR	1	10	454	58.551	0	0	0	0	150.2	Jurkat_TiO2_1mg_3_f09350	Jurkat	TiO2	3	f09350
sp|Q01082|SPTB2_HUMAN	K.RRPPSPEPS#TK.V	K.RRPPS#PEPSTK.V	RRPPSPEPSTK	1	11	2106	31.275	0	0	0	0	14396.9	Jurkat_TiO2_1mg_3_f09350	Jurkat	TiO2	3	f09350
sp|Q5VT52|RPRD2_HUMAN	R.GNEPGSDRS#PS#PSK.N	R.GNEPGSDRS#PS#PSK.N	GNEPGSDRSPSPSK	2	14	928	7.971	930	4.54	0	0	634	Jurkat_TiO2_1mg_3_f09350	Jurkat	TiO2	3	f09350
sp|Q92576|PHF3_HUMAN	R.DKVEENSVRS#PRK.S	R.DKVEENSVRS#PRK.S	DKVEENSVRSPRK	1	13	125	7.971	0	0	0	0	478.4	Jurkat_TiO2_1mg_3_f09350	Jurkat	TiO2	3	f09350
sp|P27816|MAP4_HUMAN	K.RASPS#KPASAPASR.S	K.RASPS#KPASAPASR.S	RASPSKPASAPASR	1	14	789	30.835	0	0	0	0	186.7	Jurkat_TiO2_1mg_3_f09350	Jurkat	TiO2	3	f09350
sp|P27816|MAP4_HUMAN	K.RAS#PSKPASAPASR.S	K.RAS#PSKPASAPASR.S	RASPSKPASAPASR	1	14	787	11.015	0	0	0	0	1036.5	Jurkat_TiO2_1mg_3_f09350	Jurkat	TiO2	3	f09350
sp|Q96T37|RBM15_HUMAN	K.SS#SRGGS#REYDTGGGSSSSR.L	K.SSS#RGGS#REYDTGGGSSSSR.L	SSSRGGSREYDTGGGSSSSR	2	20	104	0	109	7.971	0	0	511	Jurkat_TiO2_1mg_3_f09350	Jurkat	TiO2	3	f09350
sp|O75182|SIN3B_HUMAN	R.KKPAPGPHS#SPPEEK.G	R.KKPAPGPHS#SPPEEK.G	KKPAPGPHSSPPEEK	1	15	739	0	0	0	0	0	615.1	Jurkat_TiO2_1mg_3_f09350	Jurkat	TiO2	3	f09350
sp|Q8IYB3|SRRM1_HUMAN	R.RRS#PS#PPPTR.R	R.RRS#PS#PPPTR.R	RRSPSPPPTR	2	10	549	73.616	551	47.045	0	0	76989.8	Jurkat_TiO2_1mg_3_f09350	Jurkat	TiO2	3	f09350
sp|Q9H7N4|SFR19_HUMAN	R.RRS#AS#PPPATSSSSSSR.R	R.RRS#AS#PPPATSSSSSSR.R	RRSASPPPATSSSSSSR	2	17	612	110.807	614	97.596	0	0	1611.7	Jurkat_TiO2_1mg_3_f09350	Jurkat	TiO2	3	f09350
sp|Q9BZE4|NOG1_HUMAN	K.RKREDS#APPSSVAR.S	K.RKREDS#APPSSVAR.S	RKREDSAPPSSVAR	1	14	558	49.59	0	0	0	0	3009.1	Jurkat_TiO2_1mg_3_f09350	Jurkat	TiO2	3	f09350
sp|Q9H7N4|SFR19_HUMAN	R.RRSASPPPAT#S#SSSSSR.R	R.RRSASPPPAT#S#SSSSSR.R	RRSASPPPATSSSSSSR	2	17	619	16.964	620	16.964	0	0	496.8	Jurkat_TiO2_1mg_3_f09350	Jurkat	TiO2	3	f09350
sp|Q9UN37|VPS4A_HUMAN	K.ENQS#EGKGS#DSDSEGDNPEK.K	K.ENQSEGKGS#DS#DSEGDNPEK.K	ENQSEGKGSDSDSEGDNPEK	2	20	90	6.91	95	10.468	0	0	42.7	Jurkat_TiO2_1mg_3_f09350	Jurkat	TiO2	3	f09350
sp|Q9GZR2|REXO4_HUMAN	K.RAPSS#PVAK.P	K.RAPSS#PVAK.P	RAPSSPVAK	1	9	15	9.34	0	0	0	0	651.5	Jurkat_TiO2_1mg_3_f09350	Jurkat	TiO2	3	f09350
sp|O76021|RL1D1_HUMAN	K.AAESETPGKS#PEK.K	K.AAESETPGKS#PEK.K	AAESETPGKSPEK	1	13	427	31.275	0	0	0	0	9608	Jurkat_TiO2_1mg_3_f09350	Jurkat	TiO2	3	f09350
sp|Q1W6H9|F110C_HUMAN	R.SQS#DLSSR.Y	R.SQS#DLSSR.Y	SQSDLSSR	1	8	202	19.843	0	0	0	0	392.8	Jurkat_TiO2_1mg_3_f09350	Jurkat	TiO2	3	f09350
sp|O76021|RL1D1_HUMAN	K.AAESET#PGKSPEK.K	K.AAESETPGKS#PEK.K	AAESETPGKSPEK	1	13	423	11.721	0	0	0	0	4584.3	Jurkat_TiO2_1mg_3_f09350	Jurkat	TiO2	3	f09350
sp|Q15061|WDR43_HUMAN	R.LQAKES#PQR.K	R.LQAKES#PQR.K	LQAKESPQR	1	9	77	1000	0	0	0	0	1361.2	Jurkat_TiO2_1mg_3_f09350	Jurkat	TiO2	3	f09350
sp|O75182|SIN3B_HUMAN	R.KKPAPGPHSS#PPEEK.G	R.KKPAPGPHSS#PPEEK.G	KKPAPGPHSSPPEEK	1	15	740	30.835	0	0	0	0	226.7	Jurkat_TiO2_1mg_3_f09350	Jurkat	TiO2	3	f09350
sp|Q9BZE4|NOG1_HUMAN	K.RKREDSAPPSS#VAR.S	K.RKREDSAPPSS#VAR.S	RKREDSAPPSSVAR	1	14	563	9.34	0	0	0	0	347.8	Jurkat_TiO2_1mg_3_f09350	Jurkat	TiO2	3	f09350
sp|Q9NYF8|BCLF1_HUMAN	K.HKEEDKNS#ERITVK.K	K.HKEEDKNS#ERITVK.K	HKEEDKNSERITVK	1	14	485	27.121	0	0	0	0	394.6	Jurkat_TiO2_1mg_3_f09350	Jurkat	TiO2	3	f09350
sp|Q3V6T2|GRDN_HUMAN	K.RQTRS#S#PVLQHK.I	K.RQTRS#S#PVLQHK.I	RQTRSSPVLQHK	2	12	1652	11.015	1653	15.007	0	0	515.4	Jurkat_TiO2_1mg_3_f09350	Jurkat	TiO2	3	f09350
sp|Q8IYB3|SRRM1_HUMAN	R.RRS#PS#PPPTR.R	R.RRS#PS#PPPTR.R	RRSPSPPPTR	2	10	549	33.657	551	20.167	0	0	15003.3	Jurkat_TiO2_1mg_3_f09350	Jurkat	TiO2	3	f09350
sp|Q96T37|RBM15_HUMAN	K.HRTTAPTEGKS#PLKK.E	K.HRTTAPTEGKS#PLKK.E	HRTTAPTEGKSPLKK	1	15	741	84.609	0	0	0	0	4876.4	Jurkat_TiO2_1mg_3_f09350	Jurkat	TiO2	3	f09350
sp|Q96T37|RBM15_HUMAN	K.HRTTAPTEGKS#PLKK.E	K.HRTTAPTEGKS#PLKK.E	HRTTAPTEGKSPLKK	1	15	741	99.228	0	0	0	0	1759.7	Jurkat_TiO2_1mg_3_f09350	Jurkat	TiO2	3	f09350
sp|Q92610|ZN592_HUMAN	K.ASDSSS#PSCSSGPR.V	K.ASDSSS#PSCSSGPR.V	ASDSSSPSCSSGPR	1	14	460	9.34	0	0	0	0	120.5	Jurkat_TiO2_1mg_3_f09350	Jurkat	TiO2	3	f09350
sp|Q14103|HNRPD_HUMAN	K.NEEDEGHSNSS#PRHS#EAATAQR.E	K.NEEDEGHS#NSSPRHS#EAATAQR.E	NEEDEGHSNSSPRHSEAATAQR	2	22	83	6.591	87	15.381	0	0	40.2	Jurkat_TiO2_1mg_3_f09350	Jurkat	TiO2	3	f09350
sp|O94762|RECQ5_HUMAN	R.Y#DEGS#GGSGDEGRDEAHK.R	R.YDEGS#GGS#GDEGRDEAHK.R	YDEGSGGSGDEGRDEAHK	2	18	484	7.413	488	5.085	0	0	102.3	Jurkat_TiO2_1mg_3_f09350	Jurkat	TiO2	3	f09350
sp|Q14103|HNRPD_HUMAN	K.NEEDEGHS#NSSPRHS#EAATAQR.E	K.NEEDEGHSNS#SPRHS#EAATAQR.E	NEEDEGHSNSSPRHSEAATAQR	2	22	80	2.806	87	4.691	0	0	40.2	Jurkat_TiO2_1mg_3_f09350	Jurkat	TiO2	3	f09350
sp|P15880|RS2_HUMAN	K.THTRVS#VQR.T	K.THTRVS#VQR.T	THTRVSVQR	1	9	281	24.243	0	0	0	0	1240.3	Jurkat_TiO2_1mg_3_f09350	Jurkat	TiO2	3	f09350
sp|Q9BW71|HIRP3_HUMAN	K.AVEES#S#DEERQR.D	K.AVEES#S#DEERQR.D	AVEESSDEERQR	2	12	142	1000	143	1000	0	0	9827.1	Jurkat_TiO2_1mg_3_f09350	Jurkat	TiO2	3	f09350
sp|P23528|COF1_HUMAN		K.DRCTLAEK.L	DRCTLAEK	0	8	0	0	0	0	0	0	181.5	Jurkat_TiO2_1mg_3_f09350	Jurkat	TiO2	3	f09350
sp|O00257|CBX4_HUMAN	K.SGEVAEGEARS#PSHK.K	K.SGEVAEGEARS#PSHK.K	SGEVAEGEARSPSHK	1	15	291	11.015	0	0	0	0	637.9	Jurkat_TiO2_1mg_3_f09350	Jurkat	TiO2	3	f09350
sp|Q9BW71|HIRP3_HUMAN	K.AVEES#S#DEERQR.D	K.AVEES#S#DEERQR.D	AVEESSDEERQR	2	12	142	1000	143	1000	0	0	5876.9	Jurkat_TiO2_1mg_3_f09350	Jurkat	TiO2	3	f09350
sp|P07910|HNRPC_HUMAN	K.EAEEGEDDRDS#ANGEDDS.-	K.EAEEGEDDRDS#ANGEDDS.-	EAEEGEDDRDSANGEDDS	1	18	299	1000	0	0	0	0	449.8	Jurkat_TiO2_1mg_3_f09350	Jurkat	TiO2	3	f09350
sp|Q9BRD0|BUD13_HUMAN	R.HGSSDISS#PR.R	R.HGSSDISS#PR.R	HGSSDISSPR	1	10	240	9.34	0	0	0	0	760.5	Jurkat_TiO2_1mg_3_f09350	Jurkat	TiO2	3	f09350
sp|Q9Y4C1|KDM3A_HUMAN	K.AGVNSDS#PNNCSGK.K	K.AGVNSDS#PNNCSGK.K	AGVNSDSPNNCSGK	1	14	463	48.874	0	0	0	0	442.9	Jurkat_TiO2_1mg_3_f09350	Jurkat	TiO2	3	f09350
sp|P38159|RBMX_HUMAN	R.RGPPPPPRS#R.G	R.RGPPPPPRS#R.G	RGPPPPPRSR	1	10	102	1000	0	0	0	0	596.5	Jurkat_TiO2_1mg_3_f09350	Jurkat	TiO2	3	f09350
sp|Q12906|ILF3_HUMAN	K.RPM*EEDGEEKS#PSK.K	K.RPM*EEDGEEKS#PSK.K	RPMEEDGEEKSPSK	1	14	382	22.011	0	0	0	0	495.4	Jurkat_TiO2_1mg_3_f09350	Jurkat	TiO2	3	f09350
sp|Q8IYB3|SRRM1_HUMAN	K.RES#PSPAPKPR.K	K.RES#PSPAPKPR.K	RESPSPAPKPR	1	11	450	11.015	0	0	0	0	6936.7	Jurkat_TiO2_1mg_3_f09350	Jurkat	TiO2	3	f09350
sp|Q8NDT2|RB15B_HUMAN	R.TTHS#PYEER.S	R.TTHS#PYEER.S	TTHSPYEER	1	9	609	6.591	0	0	0	0	468.3	Jurkat_TiO2_1mg_3_f09350	Jurkat	TiO2	3	f09350
sp|Q14103|HNRPD_HUMAN	K.IDASKNEEDEGHSNS#SPR.H	K.IDASKNEEDEGHSNSS#PR.H	IDASKNEEDEGHSNSSPR	1	18	82	0	0	0	0	0	207900	Jurkat_TiO2_1mg_3_f09350	Jurkat	TiO2	3	f09350
sp|Q96F86|EDC3_HUMAN	R.HNS#WSSSSR.H	R.HNS#WSSSSR.H	HNSWSSSSR	1	9	161	17.009	0	0	0	0	852.5	Jurkat_TiO2_1mg_3_f09350	Jurkat	TiO2	3	f09350
sp|Q14677|EPN4_HUMAN	K.DREDS#PERCS#DSDEEK.K	K.DREDS#PERCS#DSDEEK.K	DREDSPERCSDSDEEK	2	16	227	20.985	232	30.835	0	0	153.7	Jurkat_TiO2_1mg_3_f09350	Jurkat	TiO2	3	f09350
sp|P14866|HNRPL_HUMAN		K.ISRPGDSDDSR.S	ISRPGDSDDSR	0	11	0	0	0	0	0	0	76.6	Jurkat_TiO2_1mg_3_f09350	Jurkat	TiO2	3	f09350
sp|Q9Y5K6|CD2AP_HUMAN	R.FNGGHS#PTHSPEK.I	R.FNGGHS#PTHSPEK.I	FNGGHSPTHSPEK	1	13	510	6.591	0	0	0	0	43.8	Jurkat_TiO2_1mg_3_f09350	Jurkat	TiO2	3	f09350
sp|Q8NDT2|RB15B_HUMAN	R.TTHS#PYEER.S	R.TTHS#PYEER.S	TTHSPYEER	1	9	609	12.092	0	0	0	0	266.6	Jurkat_TiO2_1mg_3_f09350	Jurkat	TiO2	3	f09350
sp|Q7Z4V5|HDGR2_HUMAN	K.GESAEDKEHEEGRDS#EEGPR.C	K.GESAEDKEHEEGRDS#EEGPR.C	GESAEDKEHEEGRDSEEGPR	1	20	625	17.694	0	0	0	0	570.7	Jurkat_TiO2_1mg_3_f09350	Jurkat	TiO2	3	f09350
sp|Q9NYF8|BCLF1_HUMAN	K.NT#PSQHSHSIQHS#PER.S	K.NT#PSQHSHSIQHS#PER.S	NTPSQHSHSIQHSPER	2	16	257	22.011	268	27.121	0	0	1290	Jurkat_TiO2_1mg_3_f09350	Jurkat	TiO2	3	f09350
sp|Q14677|EPN4_HUMAN	K.DREDS#PERCSDS#DEEK.K	K.DREDS#PERCSDS#DEEK.K	DREDSPERCSDSDEEK	2	16	227	15.381	234	11.015	0	0	546.2	Jurkat_TiO2_1mg_3_f09350	Jurkat	TiO2	3	f09350
sp|Q6P4R8|NFRKB_HUMAN	K.RPSPSRT#PEER.E	K.RPSPSRT#PEER.E	RPSPSRTPEER	1	11	180	0	0	0	0	0	134.2	Jurkat_TiO2_1mg_3_f09350	Jurkat	TiO2	3	f09350
sp|Q9HCG8|CWC22_HUMAN	R.RNS#FSENEK.H	R.RNS#FSENEK.H	RNSFSENEK	1	9	829	30.835	0	0	0	0	6400	Jurkat_TiO2_1mg_3_f09350	Jurkat	TiO2	3	f09350
sp|Q8IYL3|CA174_HUMAN	K.HSAGS#GAEESNSSSTVQK.Q	K.HS#AGSGAEESNSSSTVQK.Q	HSAGSGAEESNSSSTVQK	1	18	148	3.359	0	0	0	0	54.8	Jurkat_TiO2_1mg_3_f09350	Jurkat	TiO2	3	f09350
sp|P26358|DNMT1_HUMAN	R.AKS#DES#IKEEDKDQDEK.R	R.AKS#DES#IKEEDKDQDEK.R	AKSDESIKEEDKDQDEK	2	17	189	1000	192	1000	0	0	319.6	Jurkat_TiO2_1mg_3_f09350	Jurkat	TiO2	3	f09350
sp|Q7Z4V5|HDGR2_HUMAN	K.GESAEDKEHEEGRDS#EEGPR.C	K.GESAEDKEHEEGRDS#EEGPR.C	GESAEDKEHEEGRDSEEGPR	1	20	625	34.768	0	0	0	0	1227.6	Jurkat_TiO2_1mg_3_f09350	Jurkat	TiO2	3	f09350
sp|Q04637|IF4G1_HUMAN	R.TPAT#KRSFSK.E	R.TPAT#KRSFSK.E	TPATKRSFSK	1	10	1182	15.381	0	0	0	0	3175.2	Jurkat_TiO2_1mg_3_f09350	Jurkat	TiO2	3	f09350
sp|Q9NYF8|BCLF1_HUMAN	K.NTPSQHS#HSIQHS#PER.S	K.NTPS#QHSHSIQHS#PER.S	NTPSQHSHSIQHSPER	2	16	262	6.591	268	20.167	0	0	119.9	Jurkat_TiO2_1mg_3_f09350	Jurkat	TiO2	3	f09350
sp|P07900|HS90A_HUMAN	K.ERDKEVS#DDEAEEKEDK.E	K.ERDKEVS#DDEAEEKEDK.E	ERDKEVSDDEAEEKEDK	1	17	231	1000	0	0	0	0	4854.8	Jurkat_TiO2_1mg_3_f09350	Jurkat	TiO2	3	f09350
sp|Q01518|CAP1_HUMAN	R.GYADS#PSK.A	R.GYADS#PSK.A	GYADSPSK	1	8	34	6.591	0	0	0	0	1529.3	Jurkat_TiO2_1mg_3_f09350	Jurkat	TiO2	3	f09350
sp|Q9UKJ3|GPTC8_HUMAN	K.QEPGGSHGS#ETEDTGR.S	K.QEPGGSHGS#ETEDTGR.S	QEPGGSHGSETEDTGR	1	16	653	7.971	0	0	0	0	304.2	Jurkat_TiO2_1mg_3_f09350	Jurkat	TiO2	3	f09350
sp|Q8IWS0|PHF6_HUMAN	R.STSSHGTDEM*ESSSYRDRS#PHR.S	R.STSSHGTDEM*ESSSYRDRS#PHR.S	STSSHGTDEMESSSYRDRSPHR	1	22	199	14.669	0	0	0	0	2192.3	Jurkat_TiO2_1mg_3_f09350	Jurkat	TiO2	3	f09350
sp|P07900|HS90A_HUMAN	K.ERDKEVS#DDEAEEKEDK.E	K.ERDKEVS#DDEAEEKEDK.E	ERDKEVSDDEAEEKEDK	1	17	231	1000	0	0	0	0	743.3	Jurkat_TiO2_1mg_3_f09350	Jurkat	TiO2	3	f09350
sp|Q8NG08|HELB_HUMAN	K.RTCGVNDDES#PSK.I	K.RTCGVNDDES#PSK.I	RTCGVNDDESPSK	1	13	1048	4.54	0	0	0	0	39.7	Jurkat_TiO2_1mg_3_f09350	Jurkat	TiO2	3	f09350
sp|Q5T4S7|UBR4_HUMAN	R.SNT#PM*GDKDDDDDDDADEK.M	R.SNT#PM*GDKDDDDDDDADEK.M	SNTPMGDKDDDDDDDADEK	1	19	2724	7.71	0	0	0	0	19.5	Jurkat_TiO2_1mg_3_f09350	Jurkat	TiO2	3	f09350
sp|Q1KMD3|HNRL2_HUMAN	K.AAEEQGDDQDS#EKS#KPAGSDGER.R	K.AAEEQGDDQDS#EKS#KPAGSDGER.R	AAEEQGDDQDSEKSKPAGSDGER	2	23	185	26.889	188	23.523	0	0	105.9	Jurkat_TiO2_1mg_3_f09350	Jurkat	TiO2	3	f09350
sp|P07900|HS90A_HUMAN	K.ERDKEVS#DDEAEEKEDK.E	K.ERDKEVS#DDEAEEKEDK.E	ERDKEVSDDEAEEKEDK	1	17	231	1000	0	0	0	0	8032.8	Jurkat_TiO2_1mg_3_f09350	Jurkat	TiO2	3	f09350
sp|Q9BRD0|BUD13_HUMAN	R.HFRHDTPDS#SPR.R	R.HFRHDTPDS#SPR.R	HFRHDTPDSSPR	1	12	126	0	0	0	0	0	352.5	Jurkat_TiO2_1mg_3_f09350	Jurkat	TiO2	3	f09350
sp|Q9BRD0|BUD13_HUMAN	R.IRHDS#S#DTS#PPRR.A	R.IRHDS#S#DTS#PPRR.A	IRHDSSDTSPPRR	3	13	184	13.38	185	17.009	188	9.34	532.4	Jurkat_TiO2_1mg_3_f09350	Jurkat	TiO2	3	f09350
sp|O95365|ZBT7A_HUMAN	R.AGAAAGDS#DEESRADDK.G	R.AGAAAGDS#DEESRADDK.G	AGAAAGDSDEESRADDK	1	17	337	31.275	0	0	0	0	778.7	Jurkat_TiO2_1mg_3_f09350	Jurkat	TiO2	3	f09350
sp|Q9H307|PININ_HUMAN	R.ESRQES#DPEDDDVKK.P	R.ESRQES#DPEDDDVKK.P	ESRQESDPEDDDVKK	1	15	100	4.54	0	0	0	0	29.5	Jurkat_TiO2_1mg_3_f09350	Jurkat	TiO2	3	f09350
sp|Q8IWS0|PHF6_HUMAN	R.STSSHGTDEM*ESSSYRDRS#PHR.S	R.STSSHGTDEM*ESSSYRDRS#PHR.S	STSSHGTDEMESSSYRDRSPHR	1	22	199	8.913	0	0	0	0	1331.1	Jurkat_TiO2_1mg_3_f09350	Jurkat	TiO2	3	f09350
sp|P07910|HNRPC_HUMAN	K.EAEEGEDDRDS#ANGEDDS.-	K.EAEEGEDDRDS#ANGEDDS.-	EAEEGEDDRDSANGEDDS	1	18	299	1000	0	0	0	0	378.9	Jurkat_TiO2_1mg_3_f09350	Jurkat	TiO2	3	f09350
sp|P43243|MATR3_HUMAN	K.RSY#S#PDGKES#PSDKK.S	K.RS#Y#SPDGKESPS#DKK.S	RSYSPDGKESPSDKK	3	15	597	0	598	0	604	6.591	63.1	Jurkat_TiO2_1mg_3_f09350	Jurkat	TiO2	3	f09350
sp|P42167|LAP2B_HUMAN	R.QNGSNDSDRYS#DNEEDSK.I	R.QNGSNDSDRYS#DNEEDSK.I	QNGSNDSDRYSDNEEDSK	1	18	184	6.591	0	0	0	0	337.2	Jurkat_TiO2_1mg_3_f09350	Jurkat	TiO2	3	f09350
sp|Q2M2I8|AAK1_HUMAN	K.SKS#ATTT#PSGS#PR.T	K.SKS#ATTT#PSGS#PR.T	SKSATTTPSGSPR	3	13	670	19.843	674	24.437	678	30.835	505.4	Jurkat_TiO2_1mg_3_f09350	Jurkat	TiO2	3	f09350
sp|O95365|ZBT7A_HUMAN	R.AGAAAGDS#DEESRADDK.G	R.AGAAAGDS#DEESRADDK.G	AGAAAGDSDEESRADDK	1	17	337	47.045	0	0	0	0	1333.3	Jurkat_TiO2_1mg_3_f09350	Jurkat	TiO2	3	f09350
sp|Q14103|HNRPD_HUMAN	K.IDASKNEEDEGHSNS#SPR.H	K.IDASKNEEDEGHSNSS#PR.H	IDASKNEEDEGHSNSSPR	1	18	82	17.009	0	0	0	0	28620.5	Jurkat_TiO2_1mg_3_f09350	Jurkat	TiO2	3	f09350
sp|P42167|LAP2B_HUMAN	R.QNGSNDSDRYS#DNEEDSK.I	R.QNGSNDSDRY#SDNEEDSK.I	QNGSNDSDRYSDNEEDSK	1	18	184	6.591	0	0	0	0	337.2	Jurkat_TiO2_1mg_3_f09350	Jurkat	TiO2	3	f09350
sp|Q9ULR3|PPM1H_HUMAN	K.AGAVTSTPNRNS#SK.R	K.AGAVTSTPNRNS#SK.R	AGAVTSTPNRNSSK	1	14	118	24.437	0	0	0	0	57.3	Jurkat_TiO2_1mg_3_f09350	Jurkat	TiO2	3	f09350
sp|Q02539|H11_HUMAN		K.GTGASGSFK.L	GTGASGSFK	0	9	0	0	0	0	0	0	692.7	Jurkat_TiO2_1mg_3_f09350	Jurkat	TiO2	3	f09350
sp|Q14103|HNRPD_HUMAN	K.IDASKNEEDEGHSNSS#PR.H	K.IDASKNEEDEGHSNS#SPR.H	IDASKNEEDEGHSNSSPR	1	18	83	6.591	0	0	0	0	19843	Jurkat_TiO2_1mg_3_f09350	Jurkat	TiO2	3	f09350
sp|Q14677|EPN4_HUMAN	K.DREDS#PERCSDS#DEEK.K	K.DREDS#PERCSDS#DEEK.K	DREDSPERCSDSDEEK	2	16	227	9.394	234	4.085	0	0	458.2	Jurkat_TiO2_1mg_3_f09350	Jurkat	TiO2	3	f09350
sp|P42167|LAP2B_HUMAN	R.QNGSNDSDRY#SDNEEDSK.I	R.QNGSNDSDRY#SDNEEDSK.I	QNGSNDSDRYSDNEEDSK	1	18	183	0	0	0	0	0	150.3	Jurkat_TiO2_1mg_3_f09350	Jurkat	TiO2	3	f09350
sp|P07910|HNRPC_HUMAN		K.EAEEGEDDRDSANGEDDS.-	EAEEGEDDRDSANGEDDS	0	18	0	0	0	0	0	0	57.9	Jurkat_TiO2_1mg_3_f09350	Jurkat	TiO2	3	f09350
sp|P23588|IF4B_HUMAN	R.SQSS#DTEQQSPTSGGGK.V	R.SQSS#DTEQQSPTSGGGK.V	SQSSDTEQQSPTSGGGK	1	17	498	24.437	0	0	0	0	4697	Jurkat_TiO2_1mg_3_f09350	Jurkat	TiO2	3	f09350
sp|Q96ST2|IWS1_HUMAN	K.QKMDS#DEDEKEGEEEK.V	K.QKMDS#DEDEKEGEEEK.V	QKMDSDEDEKEGEEEK	1	16	377	1000	0	0	0	0	8826.8	Jurkat_TiO2_1mg_3_f09350	Jurkat	TiO2	3	f09350
sp|Q9H307|PININ_HUMAN	R.RESRQES#DPEDDDVK.K	R.RESRQES#DPEDDDVK.K	RESRQESDPEDDDVK	1	15	100	18.805	0	0	0	0	9515.3	Jurkat_TiO2_1mg_3_f09350	Jurkat	TiO2	3	f09350
sp|Q9H307|PININ_HUMAN	R.RESRQES#DPEDDDVK.K	R.RESRQES#DPEDDDVK.K	RESRQESDPEDDDVK	1	15	100	11.015	0	0	0	0	2280.5	Jurkat_TiO2_1mg_3_f09350	Jurkat	TiO2	3	f09350
sp|O75475|PSIP1_HUMAN	K.EDTDHEEKAS#NEDVTK.A	K.EDTDHEEKAS#NEDVTK.A	EDTDHEEKASNEDVTK	1	16	129	43.066	0	0	0	0	3921.8	Jurkat_TiO2_1mg_3_f09350	Jurkat	TiO2	3	f09350
sp|O75475|PSIP1_HUMAN	K.EDTDHEEKAS#NEDVTK.A	K.EDTDHEEKAS#NEDVTK.A	EDTDHEEKASNEDVTK	1	16	129	18.603	0	0	0	0	972.5	Jurkat_TiO2_1mg_3_f09350	Jurkat	TiO2	3	f09350
[truncated: 237,883+ more rows]
[truncated: 8 more columns]

## Sheet: Dataset 3
Supplemental Dataset 3
[truncated: 25,796 more rows]

[truncated: 2 more sheets: Dataset 4, Dataset 5]
